# Supplementary material
Source: PubMed Central journal article supplement (PMC6192028)

# **Palladium-Catalyzed Enantioselective Csp<sup>3</sup>–Csp<sup>3</sup> Cross-Coupling for the Synthesis of (Poly)fluorinated Chiral Building Blocks**

Yanhui Lu,<sup>†</sup> ‡ Elizabeth L. Goldstein, ‡ Brian M. Stoltz<sup>‡\*</sup>

<sup>†</sup> Graduate School of Engineering, Nagoya University, Furo-cho, Chikusa, Nagoya 464-8603, Japan

<sup>‡</sup> Warren and Katharine Schlinger Laboratory for Chemistry and Chemical Engineering, Division of Chemistry and Chemical Engineering, California Institute of Technology, MC 101-20, Pasadena, California 91125, United States

## Table of Contents

|                                                                                  |     |
|----------------------------------------------------------------------------------|-----|
| 1. Materials and Methods                                                         | S02 |
| 2. Allyl $\beta$ -Ketoester Synthesis and Characterization Data                  | S02 |
| 3. Pd(0)-Catalyzed Enantioselective Allylic Alkylation and Characterization Data | S10 |
| 4. Methods for the Determination of Enantiomeric Excess (ee) & Optical Rotation  | S16 |
| 9. Notes & References                                                            | S17 |
| 10. NMR Spectra ( <sup>1</sup> H, <sup>13</sup> C, <sup>19</sup> F)              | S18 |

## Materials and Methods

Unless stated otherwise, reactions were performed in flame-dried or oven-dried glassware under an argon or nitrogen atmosphere using dry, deoxygenated solvents (distilled or passed over a column of activated alumina).<sup>1</sup> Commercially obtained reagents were used as received with the exception of dipalladium tris(dibenzylideneacetone) ( $\text{Pd}_2(\text{dba})_3$ ), tetrakis(triphenylphosphine)palladium(0), which were stored in a nitrogen-filled glovebox. Dipalladium tris(para-methoxydibenzylideneacetone) ( $\text{Pd}_2(\text{pmdba})_3$ ),<sup>2</sup> (*S*)-*t*-BuPHOX,<sup>3</sup> (*S*)-(CF<sub>3</sub>)<sub>3</sub>-*t*BuPHOX,<sup>4</sup> were prepared by known methods. Reactions requiring external heat were modulated to the specified temperatures using an IKAmag temperature controller. Reaction progress was monitored by thin-layer chromatography (TLC), which was performed using E. Merck silica gel 60 F254 precoated glass plates (0.25 mm) and visualized by UV fluorescence quenching, potassium permanganate, or *p*-anisaldehyde staining. Silicycle SiliaFlash® P60 Academic Silica gel (particle size 40-63 nm) was used for column chromatography. <sup>1</sup>H and <sup>13</sup>C NMR spectra were recorded on a Varian Inova 500 (500 MHz and 126 MHz, respectively), and a Bruker AV III HD spectrometer equipped with a Prodigy liquid nitrogen temperature cryoprobe (400 MHz and 101 MHz, respectively) and are reported in terms of chemical shift relative to CHCl<sub>3</sub> ( $\delta$  7.26 and  $\delta$  77.16, respectively). <sup>19</sup>F NMR spectra were recorded on a Varian Inova 300 spectrometer (282 MHz) and are reported in terms of absolute chemical shift according to IUPAC standard recommendations from CFCl<sub>3</sub>. Data for <sup>1</sup>H NMR are reported as follows: chemical shift ( $\delta$  ppm) (multiplicity, coupling constant (Hz), integration). Multiplicities are reported as follows: s = singlet, d = doublet, t = triplet, m = multiplet, br s = broad singlet, app t = apparently triplet. Infrared (IR) spectra were recorded on a Perkin Elmer Paragon 1000 spectrometer using thin films deposited on NaCl plates and are reported in frequency of absorption (cm<sup>-1</sup>). Optical rotations were measured with a Jasco P-2000 polarimeter operating on the sodium D-line (589 nm), using a 100 mm path-length cell and are reported as:  $[\alpha]_D^{25}$  (concentration in g/100 mL, solvent). Analytical SFC was performed with a Mettler SFC supercritical CO<sub>2</sub> analytical chromatography system utilizing Chiralpak (AD-H, AS-H, IC) or Chiralcel (OD-H, OJ-H) columns (4.6 mm x 25 cm) obtained from Daicel Chemical Industries, Ltd. High resolution mass spectra were obtained from the Caltech Mass Spectral Facility using a JEOL JMS-600H. High Resolution Mass Spectrometer in fast atom bombardment (FAB+) ionization mode or a Agilent 6200 Series TOF with an Agilent G1978A Multimode source in electrospray ionization (ESI+), atmospheric pressure chemical ionization (APCI+), or mixed (ESI/APCI) ionization mode. Julabo Presto LH45 was used to control reaction temperatures inside the nitrogen-filled glovebox.

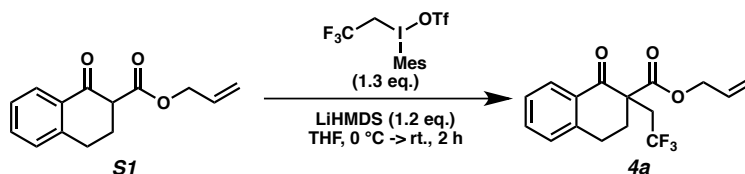

**Allyl 1-oxo-2-(2,2,2-trifluoroethyl)-1,2,3,4-tetrahydronaphthalene-2-carboxylate (**4a**):** To a solution of **S1**<sup>5</sup> (780 mg, 3.39 mmol, 1.0 equiv) in THF (10 mL) was added LiHMDS (2M solution in THF, 4.0 mmol, 1.2 equiv) at 0 °C, the resulting solution was allowed to stir at room temperature for 15 min. Then the mixture was cooled again to 0 °C, followed an addition of a THF solution (7 mL) of mesityl(2,2,2-trifluoroethyl)-λ<sup>3</sup>-iodanyl trifluoromethanesulfonate<sup>6</sup> (2.1 g, 4.4 mmol, 1.3 equiv). After 2 hours stirring at room temperature, the mixture was quenched with aqueous solution of NH<sub>4</sub>Cl, extracted with Et<sub>2</sub>O, dried over Na<sub>2</sub>SO<sub>4</sub>, filtered, and concentrated in vacuo. The crude oil was purified by column chromatography (SiO<sub>2</sub>, 5% EtOAc in hexane) to afford ketoester **4a** (570 mg, 54% yield) as a white solid; *R*<sub>f</sub> = 0.43 (10:1 Hexane:EtOAc); <sup>1</sup>H NMR (500 MHz, CDCl<sub>3</sub>)  $\delta$  8.06 (dd, *J* = 7.9, 1.4 Hz, 1H), 7.50 (app td, *J* = 7.5, 1.5 Hz, 1H), 7.33 (app t, *J* = 7.7 Hz, 1H), 7.24 (d, *J* = 7.7 Hz, 1H), 5.82 – 5.74 (m, 1H),

5.20 – 5.13 (m, 2H), 4.66 – 4.54 (m, 2H), 3.26 – 3.16 (m, 1H), 3.10 – 3.00 (m, 1H), 2.98 – 2.91 (m, 2H), 2.74 (dt,  $J = 14.0, 4.3$  Hz, 1H), 2.35 – 2.30 (m, 1H).  $^{13}\text{C}$  NMR (101 MHz,  $\text{CDCl}_3$ )  $\delta$  192.29, 169.54, 143.06, 134.14, 131.25, 131.05, 128.94, 128.54, 127.08, 126.02 (q,  $J_{\text{C-F}} = 278.5$  Hz, 1C), 118.94, 66.58, 54.70 (q,  $J_{\text{C-F}} = 1.8$  Hz, 1C), 37.35 (q,  $J_{\text{C-F}} = 29.3$  Hz, 1C), 29.74 (q,  $J_{\text{C-F}} = 1.7$  Hz, 1C), 25.83.  $^{19}\text{F}$  NMR (282 MHz,  $\text{CDCl}_3$ )  $\delta$  -59.46 (t,  $J = 11.1$  Hz, 3F). IR (thin film, NaCl) 1737, 1693, 1601, 1260, 1134  $\text{cm}^{-1}$ . HRMS (APCI/ESI)  $m/z$  calc'd for  $\text{C}_{16}\text{H}_{16}\text{F}_3\text{O}_3$   $[\text{M}+\text{H}]^+$ : 313.1046, found: 313.1044.

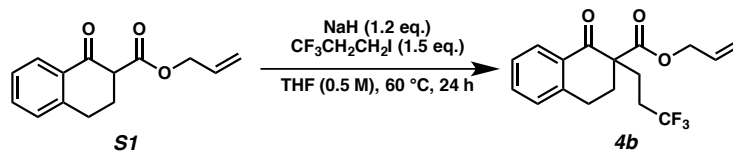

**Allyl 1-oxo-2-(3,3,3-trifluoropropyl)-1,2,3,4-tetrahydronaphthalene-2-carboxylate (4b):** To a suspension of NaH (60% in oil, 72 mg, 1.8 mmol, 1.2 equiv) in THF (2 mL) was added a THF solution of **S1** (345 mg, 1.5 mmol, 1.0 equiv), the mixture was allowed to stir at room temperature for 15 minutes followed the addition of 1,1,1-trifluoro-3-iodopropane. The resulting mixture was allowed to heat at 60 °C for 24 hours. After cooling to room temperature, quenched with aqueous solution of  $\text{NH}_4\text{Cl}$ , extracted with  $\text{Et}_2\text{O}$ , dried over  $\text{Na}_2\text{SO}_4$ , filtered, and concentrated in vacuo. The crude oil was purified by column chromatography ( $\text{SiO}_2$ , 10%  $\text{Et}_2\text{O}$  in hexane) to afford ester **4b** (148 mg, 30% yield) as a colorless oil;  $R_f = 0.43$  (10:1 Hexane: $\text{EtOAc}$ );  $^1\text{H}$  NMR (500 MHz,  $\text{CDCl}_3$ )  $\delta$  8.05 (dd,  $J = 7.9, 1.4$  Hz, 1H), 7.49 (app td,  $J = 7.5, 1.5$  Hz, 1H), 7.33 (dd,  $J = 7.9$  Hz, 1H), 7.23 (d,  $J = 7.6$  Hz, 1H), 5.79 (ddt,  $J = 17.6, 10.1, 5.6$  Hz, 1H), 5.26 – 5.09 (m, 2H), 4.70 – 4.51 (m, 2H), 3.14 – 3.05 (m, 1H), 2.96 (dt,  $J = 17.4, 5.0$  Hz, 1H), 2.59 (dt,  $J = 13.6, 4.9$  Hz, 1H), 2.47 – 2.30 (m, 1H), 2.28 – 2.06 (m, 4H).  $^{13}\text{C}$  NMR (101 MHz,  $\text{CDCl}_3$ )  $\delta$  194.82, 171.10, 142.74, 133.93, 131.89, 131.25, 128.89, 128.17, 127.13, 127.09 (q,  $J_{\text{C-F}} = 277.4$  Hz, 1C), 118.87, 66.08, 56.26, 31.62, 29.80 (q,  $J_{\text{C-F}} = 29.1$  Hz, 1C), 26.67 (q,  $J_{\text{C-F}} = 3.2$  Hz, 1C), 25.90.  $^{19}\text{F}$  NMR (282 MHz,  $\text{CDCl}_3$ )  $\delta$  -66.78 (t,  $J = 11.1$  Hz, 3F). IR (thin film, NaCl) 1735, 1670, 1602, 1258, 1228  $\text{cm}^{-1}$ . HRMS (APCI/ESI)  $m/z$  calc'd for  $\text{C}_{17}\text{H}_{18}\text{F}_3\text{O}_3$   $[\text{M}+\text{H}]^+$ : 327.1203, found: 327.1204.

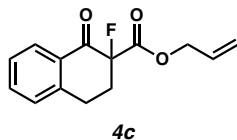

**Allyl 2-fluoro-1-oxo-1,2,3,4-tetrahydronaphthalene-2-carboxylate (4c):** The title compound **4c** was synthesized according to the known method as describe. All spectroscopic data were in agreement with the literature.<sup>7</sup>  $^1\text{H}$  NMR (500 MHz,  $\text{CDCl}_3$ )  $\delta$  8.07 (d,  $J = 7.9$  Hz, 1H), 7.55 (app td,  $J = 7.5, 1.4$  Hz, 1H), 7.36 (m, 1H), 7.28 (d,  $J = 7.8$  Hz, 1H), 5.91 – 5.82 (m, 1H), 5.30 – 5.22 (m, 2H), 4.76 – 4.68 (m, 2H), 3.19 (dt,  $J = 17.2, 5.2$  Hz, 1H), 3.08 (ddd,  $J = 17.1, 7.8, 5.0$  Hz, 1H), 2.79 – 2.70 (m, 1H), 2.60 – 2.52 (m, 1H).  $^{13}\text{C}$  NMR (101 MHz,  $\text{CDCl}_3$ )  $\delta$  188.51 (d,  $J_{\text{C-F}} = 19.0$  Hz, 1C), 167.05 (d,  $J_{\text{C-F}} = 25.9$  Hz, 1C), 143.17, 134.66, 130.81, 130.47, 128.84, 128.37 (d,  $J_{\text{C-F}} = 0.94$  Hz, 1C), 127.29, 119.12, 93.25 (d,  $J_{\text{C-F}} = 194.2$  Hz, 1C), 66.56, 31.87 (d,  $J_{\text{C-F}} = 22.6$  Hz, 1C), 24.83 (d,  $J_{\text{C-F}} = 7.24$  Hz, 1C).  $^{19}\text{F}$  NMR (282 MHz,  $\text{CDCl}_3$ )  $\delta$  -164.16 (ddd,  $J = 22.8, 11.0, 1.2$  Hz, 1F).

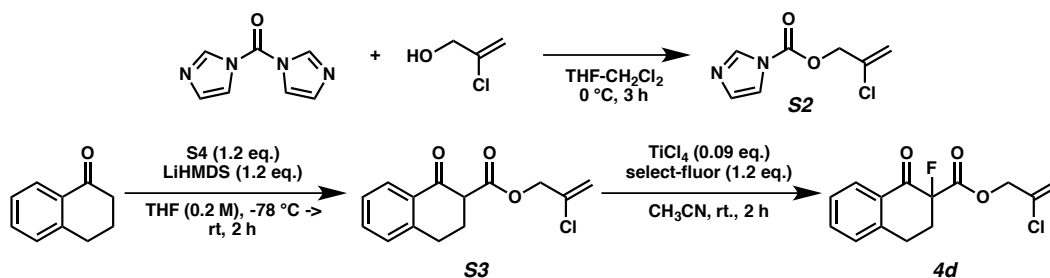

To the mixture of 1,1'-carbonyldiimidazole (**CDI**) (4.86 g, 30 mmol) and THF (15 mL) was added a solution of 2-chloro allyl alcohol (20 mmol) in 15 mL of  $\text{CH}_2\text{Cl}_2$  at 0 °C slowly, the resulting mixture was allowed to stir for 3 h at the same temperature. Most solvent was removed in vacuo and the crude product was purified by column chromatography ( $\text{SiO}_2$ , 35% EtOAc in hexane) to afford **2-chloroallyloxycarbonyl imidazole (S2)** (3.2 g, 86% yield) as a white solid;  $R_f$  = 0.15 (3:1 Hexane:EtOAc);  $^1\text{H}$  NMR (500 MHz,  $\text{CDCl}_3$ )  $\delta$  8.18 (m, 1H), 7.46 (m, 1H), 7.10 (dd,  $J$  = 1.6, 0.8 Hz, 1H), 5.61 (dt,  $J$  = 2.1, 1.0 Hz, 1H), 5.55 (d,  $J$  = 2.0 Hz, 1H), 4.97 (dd,  $J$  = 1.1, 0.4 Hz, 2H).  $^{13}\text{C}$  NMR (101 MHz,  $\text{CDCl}_3$ )  $\delta$  148.11, 137.27, 134.40, 131.05, 117.35, 117.24, 69.30. IR (thin film, NaCl) 3137, 3122, 1755, 1650, 892, 758  $\text{cm}^{-1}$ . HRMS (APCI/ESI)  $m/z$  calc'd for  $\text{C}_7\text{H}_8\text{ClN}_2\text{O}_2$   $[\text{M}+\text{H}]^+$ : 187.0269, found: 187.0265.

To a solution of Tetralone (585 mg, 4 mmol, 1.0 equiv) in THF (8 mL) was added LiHMDS (2M solution in THF, 4.4 mmol, 1.1 equiv) at -78 °C, the resulting solution was allowed to stir at the same temperature for 15 min. Then a THF solution (7 mL) of **2-chloroallyloxycarbonyl imidazole (S2)** (896 mg, 4.8 mmol, 1.2 equiv) was added. After 2 hours stirring at room temperature, the mixture was quenched with aqueous solution of  $\text{NH}_4\text{Cl}$ , extracted with  $\text{Et}_2\text{O}$ , dried over  $\text{Na}_2\text{SO}_4$ , filtered, and concentrated in vacuo. The crude oil was purified by column chromatography ( $\text{SiO}_2$ , 5% EtOAc in hexane) to afford **S3** (718 mg, 67% yield) as a light yellow oil;  $R_f$  = 0.41 (10:1 Hexane:EtOAc); Mixture of enol ketone form (3/2).  $^1\text{H}$  NMR (500 MHz,  $\text{CDCl}_3$ ): for enol form:  $\delta$  12.22 (s, 0.6H), 7.81 (dd,  $J$  = 7.6, 1.4 Hz, 0.6H), 7.36 – 7.25 (m, 1.2H), 7.20 – 7.18 (m, 0.6H), 5.70 – 5.37 (m, 1.2H), 4.77 – 4.72 (m, 1.2H), 2.85 (dd,  $J$  = 8.8, 6.7 Hz, 1.2H), 2.64 (dd,  $J$  = 8.8, 6.6 Hz, 1.2H); for ketone form  $\delta$  8.05 (dd,  $J$  = 7.9, 1.4 Hz, 0.4H), 7.51 (app td,  $J$  = 7.5, 1.5 Hz, 0.4H), 7.36 – 7.25 (m, 0.4H), 5.67 – 5.37 (m, 0.8H), 4.80 (s, 0.8H), 3.70 (dd,  $J$  = 10.8, 4.7 Hz, 0.4H), 3.29 – 2.93 (m, 0.8H), 2.55 (dddd,  $J$  = 13.4, 10.9, 9.6, 5.0 Hz, 0.4H), 2.48 – 2.36 (m, 0.4H).  $^{13}\text{C}$  NMR (101 MHz,  $\text{CDCl}_3$ ): for enol form:  $\delta$  169.44, 166.16, 139.61, 135.95, 130.94, 129.81, 128.95, 127.59, 126.73, 114.82, 96.44, 65.84, 27.78, 26.47; for ketone form:  $^{13}\text{C}$  NMR (101 MHz,  $\text{CDCl}_3$ )  $\delta$  192.86, 171.65, 143.67, 135.29, 134.13, 131.71, 127.84, 127.07, 124.57, 115.07, 66.40, 54.60, 27.75, 20.50. IR (thin film, NaCl) 1750, 1686, 1651, 1617, 1597, 1569, 1266, 1212, 1132, 1085  $\text{cm}^{-1}$ . HRMS (APCI/ESI)  $m/z$  calc'd for  $\text{C}_{14}\text{H}_{14}\text{ClO}_2$   $[\text{M}+\text{H}]^+$ : 265.0626, found: 265.0627.

Neat  $\text{TiCl}_4$  (10  $\mu\text{L}$ , 0.09 mmol, 0.09 equiv) was added to a solution of **S3** (265 mg, 1.0 mmol, 1.0 equiv) in  $\text{CH}_3\text{CN}$  (5 mL), resulting in an immediate color change from pale yellow to dark orange-brown. After 5 min, Selectfluor (425 mg, 1.2 mmol, 1.2 equiv) was added in one portion. The mixture was stirred vigorously at room temperature for 2 h, during which time the dark orange-brown color faded to yellow. The reaction was quenched by addition of  $\text{H}_2\text{O}$ , extracted with  $\text{Et}_2\text{O}$ , dried over  $\text{Na}_2\text{SO}_4$ , filtered, and concentrated in vacuo. The crude oil was purified by column chromatography ( $\text{SiO}_2$ , 10% EtOAc in hexane) to afford ester **4d** (217 mg, 77% yield) as a colorless oil;<sup>7</sup>  $R_f$  = 0.12 (10:1 Hexane:EtOAc);  $^1\text{H}$  NMR (500 MHz,  $\text{CDCl}_3$ )  $\delta$  8.08 (dd,  $J$  = 7.9, 1.4 Hz, 1H), 7.56 (app td,  $J$  = 7.5, 1.4 Hz, 1H), 7.38 (app t,  $J$  = 7.8 Hz, 1H), 7.29 (d,  $J$  = 7.7 Hz, 1H), 5.49 – 5.34 (m, 2H), 4.79 (dd,  $J$  = 13.7, 41.56 Hz, 2H), 3.22 (ddd,  $J$  = 17.2, 7.7, 5.7 Hz, 1H), 3.11 (ddd,  $J$  = 17.2, 7.4, 5.0 Hz, 1H), 2.86 – 2.69 (m, 1H), 2.67 – 2.53 (m, 1H).  $^{13}\text{C}$  NMR (101 MHz,  $\text{CDCl}_3$ )  $\delta$  188.16 (d,  $J_{\text{C-F}}$  = 18.5 Hz), 166.56 (d,  $J_{\text{C-F}}$  = 26.8 Hz, 1C), 143.18, 134.78, 134.35, 130.30, 128.88, 128.37 (d,  $J_{\text{C-F}}$  = 1.2 Hz, 1C), 127.32, 115.82, 93.22 (d,  $J_{\text{C-F}}$  = 194.0 Hz, 1C), 66.96, 31.79 (d,  $J_{\text{C-F}}$  = 22.2 Hz, 1C), 24.67 (d,  $J_{\text{C-F}}$  = 7.1 Hz, 1C).  $^{19}\text{F}$  NMR (282 MHz,  $\text{CDCl}_3$ )  $\delta$  -164.46 (dd,  $J$  = 23.7, 11.3 Hz, 1F). IR (thin film, NaCl) 1764, 1701,

1600, 1272, 1184, 1084  $\text{cm}^{-1}$ . HRMS (APCI/ESI)  $m/z$  calc'd for  $\text{C}_{14}\text{H}_{13}\text{ClFO}_3$   $[\text{M}+\text{H}]^+$ : 283.0532, found: 283.0530.

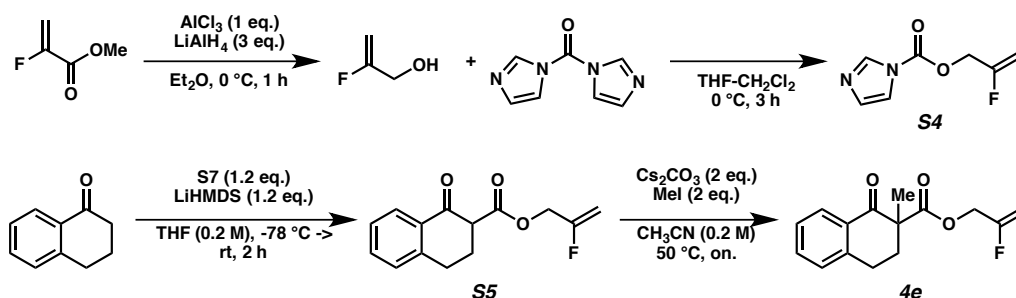

The procedure for preparation of 2-fluoroprop-2-en-1-ol was adapted from the work of Herzon and coworkers.<sup>8</sup>

Solid aluminum chloride (1.0 g, 8.78 mmol, 1.0 equiv) was added portion-wise over 10 min to a solution of lithium aluminum hydride (1.17 g, 26.3 mmol, 3.0 equiv) in  $\text{Et}_2\text{O}$  (20 mL) at 0 °C. The resulting mixture was stirred for 30 min at 0 °C. Methyl 2-fluoroacrylate (820  $\mu\text{L}$ , 8.78 mmol, 1.0 equiv) was then added dropwise via syringe to the mixture. The reaction mixture was stirred for 1 h at 0 °C at atmosphere of nitrogen. Distilled water (1.0 mL) and 15% aqueous sodium hydroxide solution (1.0 mL) were then added in sequence dropwise via syringe over 20 min (10 min addition of each reagent). A second portion of distilled water (3.0 mL) was then added dropwise via syringe over 5 min. The resulting mixture was stirred for 10 min at 0 °C. The heterogeneous mixture was filtered through a Buchner funnel, and the filter cake was rinsed with  $\text{Et}_2\text{O}$  (100 mL). The filtrates were combined and dried over anhydrous  $\text{MgSO}_4$ . The dried solution was filtered and the filtrate was concentrated (150 torr, 0 °C). The product is very volatile, therefore  $\text{Et}_2\text{O}$  was not completely removed. The solution of 2-fluoroallyl alcohol in  $\text{Et}_2\text{O}$  was used directly and immediately in the following step.

To the mixture of 1,1'-carbonyldiimidazole (CDI) (1.3 g, 8 mmol) and  $\text{CH}_2\text{Cl}_2$  (5 mL) was added a solution of 2-fluoroallyl alcohol from last step in  $\text{Et}_2\text{O}$  at 0 °C slowly, the resulting mixture was allowed to stir for 3 h at the same temperature. Most solvent was removed in vacuo and the crude product was purified by column chromatography ( $\text{SiO}_2$ , 50%  $\text{EtOAc}$  in hexane) to afford **2-fluoroallyloxycarbonyl imidazole (S4)** (1.3 g, 86% yield over two steps) as a white solid;  $R_f$  = 0.43 (1:1 Hexane: $\text{EtOAc}$ );  $^1\text{H}$  NMR (500 MHz,  $\text{CDCl}_3$ )  $\delta$  8.16 (m, 1H), 7.44 (dd,  $J$  = 2.8, 1.4 Hz, 1H), 7.09 (m, 1H), 4.96 (ddd,  $J$  = 15.1, 3.5, 1.2 Hz, 1H), 4.92 (d,  $J$  = 15.5 Hz, 2H), 4.79 (dd,  $J$  = 46.2, 3.5 Hz, 1H).  $^{13}\text{C}$  NMR (101 MHz,  $\text{CDCl}_3$ )  $\delta$  158.55 (d,  $J_{\text{C-F}}$  = 258.7 Hz, 1C), 148.26, 137.29, 131.05, 117.26, 96.83 (d,  $J_{\text{C-F}}$  = 16.9 Hz, 1C), 64.73 (d,  $J_{\text{C-F}}$  = 32.7 Hz, 1C).  $^{19}\text{F}$  NMR (282 MHz,  $\text{CDCl}_3$ )  $\delta$  -105.69 – -106.02 (m, 1F). IR (thin film, NaCl) 1766, 1682, 1408, 1384, 1316, 1295, 1242, 1168, 997  $\text{cm}^{-1}$ . HRMS (APCI/ESI)  $m/z$  calc'd for  $\text{C}_7\text{H}_7\text{FN}_2\text{O}_2$   $[\text{M}+\text{H}]^+$ : 171.0564, found: 171.0564.

To a solution of Tetralone (585 mg, 4 mmol, 1.0 equiv) in THF (8 mL) was added LiHMDS (2M solution in THF, 4.8 mmol, 1.2 equiv) at -78 °C, the resulting solution was allowed to stir at the same temperature for 15 min. Then a THF solution (7 mL) of **2-fluoroallyloxycarbonyl imidazole (S4)** (817 mg, 4.8 mmol, 1.2 equiv) was added. After 2 hours stirring at room temperature, the mixture was quenched with aqueous solution of  $\text{NH}_4\text{Cl}$ , extracted with  $\text{Et}_2\text{O}$ , dried over  $\text{Na}_2\text{SO}_4$ , filtered, and concentrated in vacuo. The crude oil was purified by column chromatography ( $\text{SiO}_2$ , 10%  $\text{Et}_2\text{O}$  in hexane) to afford **S5** (417 mg, 42% yield) as a light yellow oil;  $R_f$  = 0.43 (10:1 Hexane: $\text{EtOAc}$ ); Mixture of enol ketone form (3/2).  $^1\text{H}$  NMR (500 MHz,  $\text{CDCl}_3$ ): for enol form:  $\delta$  12.22 (s, 0.6H), 7.86 – 7.76 (m, 0.6H), 7.42 – 7.27 (m, 1.2H), 7.22 – 7.15 (m, 0.6H), 4.86 (dd,  $J$  = 16.0, 3.2 Hz, 0.6H), 4.79 – 4.69 (m, 1.8H), 2.90 – 2.78 (m, 1.2H), 2.69 – 2.57 (m, 1.2H); for ketone form:  $\delta$  8.09 – 8.00 (m, 0.4H), 7.51 (dd,  $J$  = 7.5, 1.5 Hz, 0.4H), 7.38 – 7.28 (m, 0.8H), 4.83 (dd,  $J$  = 16.3, 3.3 Hz, 0.4H), 4.74 – 4.64 (m, 1.2H), 3.69 (dd,  $J$  =

11.0, 4.7 Hz, 0.4H), 3.13 – 2.99 (m, 0.8H), 2.57 – 2.49 (m, 0.4H), 2.44 – 2.36 (m, 0.4H).  $^{13}\text{C}$  NMR (101 MHz,  $\text{CDCl}_3$ ): for enol form  $\delta$  169.69, 166.15, 160.39 (d,  $J_{\text{C-F}} = 257.9$  Hz, 0.6C), 139.69, 130.97, 129.87, 128.97, 127.63, 124.62, 96.51, 94.56 (d,  $J_{\text{C-F}} = 17.1$  Hz, 0.6C), 61.31 (d,  $J_{\text{C-F}} = 34.4$  Hz, 0.6C), 27.84, 26.48; for ketone form:  $\delta$  192.88, 171.88, 159.94 (d,  $J_{\text{C-F}} = 257.9$  Hz, 0.4C), 143.70, 134.17, 131.75, 127.93, 127.13, 126.77, 94.63 (d,  $J_{\text{C-F}} = 16.8$  Hz, 0.4C), 61.89 (d,  $J = 34.8$  Hz, 0.4C), 54.66, 27.84, 20.55.  $^{19}\text{F}$  NMR (282 MHz,  $\text{CDCl}_3$ )  $\delta$  -105.33 – -105.98 (m, 1F). IR (thin film, NaCl) 1749, 1686, 1651, 1617, 1598, 1569, 1263, 1210, 1198, 1132, 1085  $\text{cm}^{-1}$ . HRMS (APCI/ESI)  $m/z$  calc'd for  $\text{C}_{14}\text{H}_{14}\text{FO}_3$   $[\text{M}+\text{H}]^+$ : 249.0921, found: 249.0923.

The mixture of **S5** (451 mg, 1.81 mmol, 1.0 equiv), cesium carbonate (1.29 g, 3.92 mmol, 2.0 equiv) and MeI (244 mL, 3.92 mmol, 2.0 equiv) in  $\text{CH}_3\text{CN}$  was heated at 50  $^\circ\text{C}$  for 12 hours. After cooling, the solution was filtered and concentrated in vacuo. The crude product was purified by column chromatography ( $\text{SiO}_2$ , 10%  $\text{Et}_2\text{O}$  in hexane) to furnish  $\beta$ -ketoester **4e** (370 mg, 78% yield) as a colorless oil;  $R_f = 0.28$  (10:1 Hexane:EtOAc);  $^1\text{H}$  NMR (500 MHz,  $\text{CDCl}_3$ )  $\delta$  8.06 (dd,  $J = 7.8, 1.4$  Hz, 1H), 7.48 (app td,  $J = 7.5, 1.5$  Hz, 1H), 7.32 (app t,  $J = 7.8$  Hz, 1H), 7.23 (d,  $J = 7.8$  Hz, 1H), 4.72 (dd,  $J = 16.1, 3.3$  Hz, 1H), 4.69 – 4.54 (m, 2H), 4.48 (dd,  $J = 3.3, 47.7$  Hz, 1H), 3.06 (ddd,  $J = 17.4, 9.3, 4.9$  Hz, 1H), 2.97 (dt,  $J = 17.3, 5.5$  Hz, 1H), 2.70 (ddd,  $J = 13.6, 6.2, 4.8$  Hz, 1H), 2.15 (ddd,  $J = 13.9, 9.2, 4.9$  Hz, 1H), 1.54 (s, 3H).  $^{13}\text{C}$  NMR (101 MHz,  $\text{CDCl}_3$ )  $\delta$  195.79, 172.35, 159.79 (d,  $J_{\text{C-F}} = 258.7$  Hz, 1C), 143.16, 133.76, 131.59, 128.90, 128.22, 127.02, 94.15 (d,  $J_{\text{C-F}} = 16.5$  Hz, 1C), 61.72 (d,  $J_{\text{C-F}} = 35.2$  Hz, 1C), 54.07, 33.81, 25.95, 20.47.  $^{19}\text{F}$  NMR (282 MHz,  $\text{CDCl}_3$ )  $\delta$  -106.01 – -106.32 (m, 1F). IR (thin film, NaCl) 1738, 1682, 1601, 1227, 1164  $\text{cm}^{-1}$ . HRMS (APCI/ESI)  $m/z$  calc'd for  $\text{C}_{15}\text{H}_{16}\text{FO}_3$   $[\text{M}+\text{H}]^+$ : 263.1078, found: 263.1078.

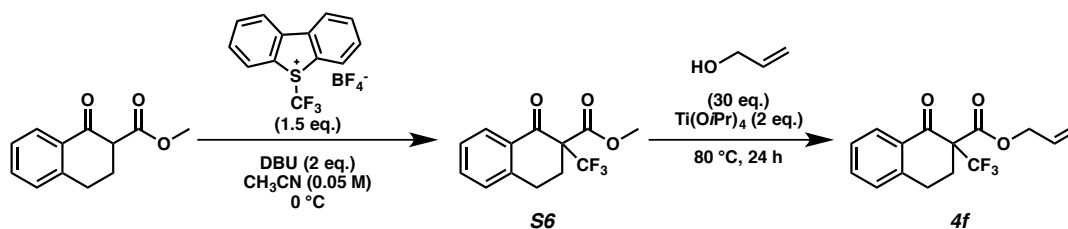

The procedure for preparation of **4f** was adapted from the work of Shibata and coworkers.<sup>9</sup>

To a stirred solution of **methyl 1-oxo-1,2,3,4-tetrahydronaphthalene-2-carboxylate**<sup>10</sup> (224 mg, 1.1 mmol, 1.0 equiv) in  $\text{CH}_3\text{CN}$  (11 mL) was added DBU (328 mL, 2.2 mmol, 2.0 equiv) at room temperature. After stirring at room temperature for 15 min, the mixture was cooled down to 0  $^\circ\text{C}$  and a solution of the trifluoromethylating reagent (561 mg, 1.65 mmol, 1.5 equiv.) in acetonitrile (11 mL) was added dropwise at the same temperature. Reaction mixture was stirred 10 min, and then warmed up to room temperature, the solvent was evaporated, and the crude product was purified by column chromatography ( $\text{SiO}_2$ , 10% EtOAc in pentane) to furnish  $\alpha$ -trifluoromethyl- $\beta$ -ketoester **S6** (281mg, 94% yield) as a colorless oil;  $R_f = 0.18$  (10:1 Hexane:EtOAc).

To a stirred solution of **S6** (281mg, 1.03 mmol, 1.0 equiv) in allyl alcohol (30.0 equiv.) was added  $\text{Ti}(\text{O}i\text{Pr})_4$  (2.0 equiv) at 80  $^\circ\text{C}$  under nitrogen atmosphere. After reaction mixture was stirred at the same temperature for 24 h, it was cooled down to room temperature and quenched with aqueous solution of  $\text{NH}_4\text{Cl}$ . Aqueous layer was extracted with  $\text{CH}_2\text{Cl}_2$  (20 mL x 4), and the combined organic layers was washed with brine, dried over  $\text{Na}_2\text{SO}_4$ , filtered, and concentrated in vacuo. The crude oil was purified by column chromatography ( $\text{SiO}_2$ , 10% EtOAc in hexane) to afford **4f** (242 mg, 74% yield) as a light yellow oil;  $R_f = 0.50$  (5:1 Hexane:EtOAc); All spectroscopic data were in agreement with the literature<sup>9</sup>  $^1\text{H}$  NMR (500 MHz,  $\text{CDCl}_3$ )  $\delta$  8.12 (dd,  $J = 7.8, 1.4$  Hz, 1H), 7.53 (app td,  $J = 7.5, 1.4$  Hz, 1H), 7.38 – 7.32 (m, 1H), 7.24 (d,  $J = 7.8$  Hz, 1H), 5.92 – 5.67 (m, 1H), 5.32 – 5.07 (m, 2H), 4.84 – 4.56 (m, 2H), 3.22 – 2.97 (m, 2H), 2.85 (dt,  $J = 13.6, 4.2$  Hz, 1H), 2.50 (ddd,  $J = 13.6, 10.3, 6.7$  Hz, 1H).  $^{13}\text{C}$  NMR (101

MHz, CDCl<sub>3</sub>)  $\delta$  187.09, 165.11 (q,  $J_{C-F}$  = 1.9 Hz, 1C), 142.14, 134.44, 131.62 (q,  $J_{C-F}$  = 1.5 Hz, 1C), 130.53, 128.82, 128.54, 127.44, 123.95 (q,  $J_{C-F}$  = 284.0 Hz, 1C), 119.28, 67.09, 62.15 (q,  $J_{C-F}$  = 24.1 Hz, 1C), 27.83 (q,  $J_{C-F}$  = 2.3 Hz, 1C), 25.19. <sup>19</sup>F NMR (282 MHz, CDCl<sub>3</sub>)  $\delta$  -68.73 (s, 3F).

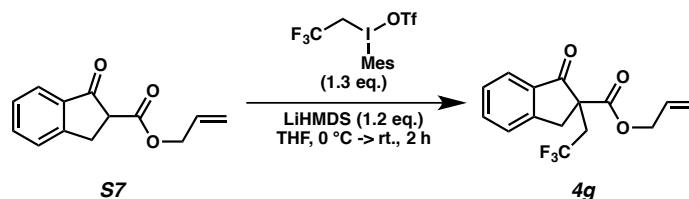

**Allyl 1-oxo-2-(2,2,2-trifluoroethyl)-2,3-dihydro-1H-indene-2-carboxylate (4g)** was synthesized using the same method with **4a** from **allyl 1-oxo-2,3-dihydro-1H-indene-2-carboxylate (S7)**<sup>11</sup>. The crude oil was purified by column chromatography (SiO<sub>2</sub>, 50% CH<sub>2</sub>Cl<sub>2</sub> in hexane) to afford **4g** (110 mg, 37% yield) as a light yellow oil;  $R_f$  = 0.38 (1:1 Hexane:CH<sub>2</sub>Cl<sub>2</sub>); <sup>1</sup>H NMR (500 MHz, CDCl<sub>3</sub>)  $\delta$  7.78 (dd,  $J$  = 7.7, 0.9 Hz, 1H), 7.66 (app td,  $J$  = 7.5, 1.2 Hz, 1H), 7.53 (app dt,  $J$  = 7.7, 1.0 Hz, 1H), 7.42 (app td,  $J$  = 7.9, 0.9 Hz, 1H), 5.81 (ddt,  $J$  = 17.2, 10.5, 5.6 Hz, 1H), 5.39 – 5.15 (m, 2H), 4.64 – 4.53 (m, 2H), 3.88 (d,  $J$  = 17.3 Hz, 1H), 3.52 – 3.15 (m, 2H), 2.66 (dq,  $J$  = 15.5, 10.5 Hz, 1H). <sup>13</sup>C NMR (101 MHz, CDCl<sub>3</sub>)  $\delta$  199.24, 168.43, 153.15, 136.10, 133.83, 131.18, 128.20, 126.50, 126.10 (q,  $J_{C-F}$  = 277.7 Hz, 1C), 125.32, 118.86, 66.91, 57.37 (q,  $J_{C-F}$  = 1.9 Hz, 1C), 37.62 (q,  $J_{C-F}$  = 29.1 Hz, 1C), 35.34 (q,  $J_{C-F}$  = 1.7 Hz, 1C). <sup>19</sup>F NMR (282 MHz, CDCl<sub>3</sub>) -60.61 (t,  $J$  = 10.5 Hz, 3F). IR (thin film, NaCl) 1745, 1719, 1608, 1257, 1169 cm<sup>-1</sup>. HRMS (APCI/ESI)  $m/z$  calc'd for C<sub>15</sub>H<sub>14</sub>F<sub>3</sub>O<sub>3</sub> [M+H]<sup>+</sup>: 299.0890, found: 299.0898.

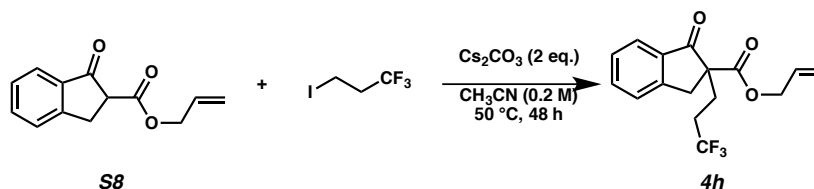

**Allyl 1-oxo-2-(3,3,3-trifluoropropyl)-2,3-dihydro-1H-indene-2-carboxylate (4h)**: The mixture of **allyl 1-oxo-2,3-dihydro-1H-indene-2-carboxylate (S8)** (216 mg, 1.0 mmol, 1.0 equiv), Cesium carbonate (652 mg, 2.0 mmol, 2.0 equiv) and 1,1,1-trifluoro-3-iodopropane (447 mL, 2.0 mmol, 2.0 equiv) in CH<sub>3</sub>CN (5 mL) was heated at 50 °C for 48 hours. After cooling, the solution was filtered and concentrated in vacuo. The crude product was purified by column chromatography (SiO<sub>2</sub>, 50% CH<sub>2</sub>Cl<sub>2</sub> in hexane) to furnish  $\beta$ -ketoester **4h** (98 mg, 31% yield) as a colorless oil;  $R_f$  = 0.37 (1:1 Hexane:CH<sub>2</sub>Cl<sub>2</sub>); <sup>1</sup>H NMR (500 MHz, CDCl<sub>3</sub>)  $\delta$  7.80 (ddd,  $J$  = 7.7, 1.3, 0.8 Hz, 1H), 7.66 (app td,  $J$  = 7.5, 1.2 Hz, 1H), 7.50 (app dt,  $J$  = 7.7, 0.9 Hz, 1H), 7.44 (ddd,  $J$  = 7.9, 7.2, 0.9 Hz, 1H), 5.83 (ddt,  $J$  = 17.1, 10.4, 5.6 Hz, 1H), 5.34 – 5.14 (m, 2H), 4.69 – 4.54 (m, 2H), 3.73 (d,  $J$  = 17.2 Hz, 1H), 3.06 (d,  $J$  = 17.2 Hz, 1H), 2.39 – 2.24 (m, 2H), 2.22 – 2.06 (m, 2H). <sup>13</sup>C NMR (101 MHz, CDCl<sub>3</sub>)  $\delta$  201.52, 170.28, 152.45, 135.93, 134.96, 131.37, 128.34, 126.89 (q,  $J_{C-F}$  = 275.9 Hz, 1C), 126.58, 125.20, 118.83, 66.36, 58.81, 37.62, 29.70 (q,  $J_{C-F}$  = 29.2 Hz, 1C), 27.16 (q,  $J_{C-F}$  = 3.3 Hz, 1C). <sup>19</sup>F NMR (282 MHz, CDCl<sub>3</sub>)  $\delta$  -66.70 (t,  $J$  = 10.1 Hz, 3F). IR (thin film, NaCl) 1741, 1711, 1255, 1141 cm<sup>-1</sup>. HRMS (APCI/ESI)  $m/z$  calc'd for C<sub>16</sub>H<sub>16</sub>F<sub>3</sub>O<sub>3</sub> [M+H]<sup>+</sup>: 313.1046, found: 313.1040.

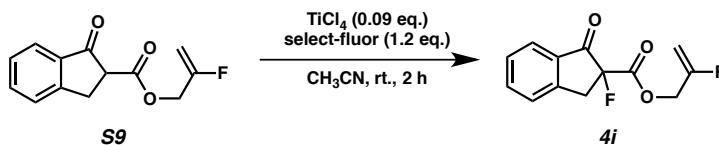

**2-Fluoroallyl 1-oxo-2,3-dihydro-1H-indene-2-carboxylate (S9)** was synthesized using the same method with **S5** from **1-Indanone** and **S4**. The crude oil was purified by column chromatography (SiO<sub>2</sub>, 20% Et<sub>2</sub>O in hexane) to afford **S9** (515 mg, 73% yield) as a colorless oil; *R<sub>f</sub>* = 0.28 (10:1 Hexane:EtOAc); Mixture of enol ketone form (1/4). <sup>1</sup>H NMR (300 MHz, CDCl<sub>3</sub>): ketone form δ 7.82 – 7.74 (m, 0.8H), 7.69 – 7.59 (m, 0.8H), 7.56 – 7.47 (m, 0.8H), 7.47 – 7.36 (m, 0.8H), 4.95 – 4.57 (m, 3.2H), 3.79 (dd, *J* = 8.3, 4.2 Hz, 0.8H), 3.70 – 3.51 (m, 0.8H), 3.49 – 3.30 (m, 0.8H). <sup>13</sup>C NMR (101 MHz, CDCl<sub>3</sub>): ketone form δ 199.00, 168.60, 159.81 (d, *J<sub>C-F</sub>* = 257.5 Hz, 0.8C), 153.54, 135.70, 135.23, 128.06, 126.70, 124.92, 94.69 (d, *J<sub>C-F</sub>* = 16.6 Hz, 0.8C), 62.20 (d, *J<sub>C-F</sub>* = 35.1 Hz, 0.8C), 53.16, 30.38. <sup>19</sup>F NMR (282 MHz, CDCl<sub>3</sub>) δ -105.40 – -105.71 (m, 0.2F), -105.72 – -106.08 (m, 0.8F). IR (thin film, NaCl) 1745, 1713, 1685, 1204, 1150, 761 cm<sup>-1</sup>; HRMS (APCI/ESI) *m/z* calc'd for C<sub>13</sub>H<sub>10</sub>FO<sub>3</sub> [M-H]<sup>-</sup>: 233.0619, found: 233.0618.

**2-Fluoroallyl 2-fluoro-1-oxo-2,3-dihydro-1H-indene-2-carboxylate (4i)** was synthesized using the same method with **4d** from **S9**. The crude oil was purified by column chromatography (SiO<sub>2</sub>, 10% EtOAc in hexane) to afford **4i** (176 mg, 70% yield) as a pale solid; *R<sub>f</sub>* = 0.28 (10:1 Hexane:EtOAc); <sup>1</sup>H NMR (500 MHz, CDCl<sub>3</sub>) δ 7.85 (dd, *J* = 7.7, 0.7 Hz, 1H), 7.72 (app td, *J* = 7.5, 1.2 Hz, 1H), 7.55 – 7.43 (m, 2H), 4.85 – 4.64 (m, 3H), 4.60 (dd, *J* = 47.0, 3.5 Hz, 1H), 3.82 (dd, *J* = 17.7, 11.7 Hz, 1H), 3.48 (dd, *J* = 23.3, 17.6 Hz, 1H). <sup>13</sup>C NMR (101 MHz, CDCl<sub>3</sub>) δ 194.81 (d, *J<sub>C-F</sub>* = 18.2 Hz, 1C), 166.79 (d, *J<sub>C-F</sub>* = 28.5 Hz, 1C), 158.91 (d, *J<sub>C-F</sub>* = 257.6 Hz, 1C), 150.85 (d, *J<sub>C-F</sub>* = 3.4 Hz, 1C), 137.02, 133.20, 128.88, 126.76 (d, *J<sub>C-F</sub>* = 1.3 Hz, 1C), 125.87 (d, *J<sub>C-F</sub>* = 1.1 Hz, 1C), 95.41 (d, *J* = 16.6 Hz, 1C), 94.57 (d, *J<sub>C-F</sub>* = 202.0 Hz, 1C), 62.67 (d, *J<sub>C-F</sub>* = 34.7 Hz, 1C), 38.33 (d, *J<sub>C-F</sub>* = 23.8 Hz, 1C). <sup>19</sup>F NMR (282 MHz, CDCl<sub>3</sub>) δ -106.19 – -106.51 (m, 1F), -164.54 (dd, *J* = 23.3, 11.9 Hz, 1F). IR (thin film, NaCl) 1771, 1724, 1600, 1282, 1184, 1071 cm<sup>-1</sup>. HRMS (APCI/ESI) *m/z* calc'd for C<sub>13</sub>H<sub>11</sub>F<sub>2</sub>O<sub>2</sub> [M+H]<sup>+</sup>: 253.0671, found: 253.0672.

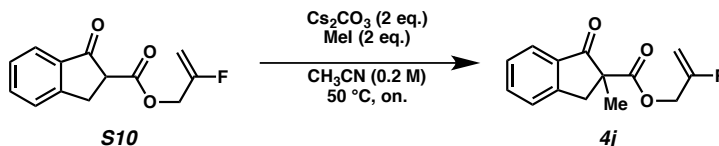

**2-Fluoroallyl 2-methyl-1-oxo-2,3-dihydro-1H-indene-2-carboxylate (4j)** was synthesized using the same method with **4e** from **S10**. The crude oil was purified by column chromatography (SiO<sub>2</sub>, 100% CH<sub>2</sub>Cl<sub>2</sub>) to afford **4j** (170 mg, 69% yield) as a colorless oil; *R<sub>f</sub>* = 0.34 (10:1 Hexane:EtOAc); <sup>1</sup>H NMR (500 MHz, CDCl<sub>3</sub>) δ 7.80 (dd, *J* = 7.7, 0.5 Hz, 1H), 7.64 (app td, *J* = 7.5, 1.2 Hz, 1H), 7.49 (app dt, *J* = 7.7, 1.0 Hz, 1H), 7.45 – 7.40 (m, 1H), 4.75 (dd, *J* = 16.1, 3.3 Hz, 1H), 4.70 – 4.47 (m, 3H), 3.74 (dd, *J* = 17.1, 0.9 Hz, 1H), 3.04 (dq, *J* = 17.0, 0.7 Hz, 1H), 1.55 (s, 3H). <sup>13</sup>C NMR (101 MHz, CDCl<sub>3</sub>) δ 203.01, 171.38, 159.77 (d, *J<sub>C-F</sub>* = 257.4 Hz, 1C), 152.58, 135.62, 134.61, 128.07, 126.63, 125.18, 94.21 (d, *J<sub>C-F</sub>* = 16.6 Hz, 1C), 61.90 (d, *J<sub>C-F</sub>* = 35.4 Hz, 1C), 56.08, 40.04, 21.13. <sup>19</sup>F NMR (282 MHz, CDCl<sub>3</sub>) δ -106.09 – -106.41 (m, 1F). IR (thin film, NaCl) 1748, 1712, 1606, 1280, 1156, 1091 cm<sup>-1</sup>; HRMS (APCI/ESI) *m/z* calc'd for C<sub>14</sub>H<sub>14</sub>FO<sub>3</sub> [M+H]<sup>+</sup>: 249.0921, found: 249.0919.

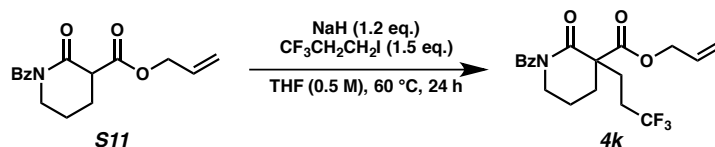

**Allyl 1-benzoyl-2-oxo-3-(3,3,3-trifluoropropyl)piperidine-3-carboxylate (4k)** was synthesized using the same method with **4b** from **allyl 1-benzoyl-2-oxopiperidine-3-carboxylate (S11)**<sup>12</sup>. The crude oil was purified by column chromatography (SiO<sub>2</sub>, 100% CH<sub>2</sub>Cl<sub>2</sub>) to afford **4k** (142 mg, 37% yield) as a colorless oil; *R<sub>f</sub>* = 0.54 (3:1 Hexane:EtOAc); <sup>1</sup>H NMR (500 MHz, CDCl<sub>3</sub>) δ 7.75 – 7.70 (m, 2H), 7.52 – 7.48 (m, 1H), 7.41 – 7.38 (m, 2H), 5.99 (ddt, *J* = 17.2, 10.4, 6.1 Hz, 1H), 5.43 (dq, *J* = 17.1, 1.4 Hz, 1H), 5.37 (dq, *J* = 10.4, 1.1 Hz, 1H), 4.76 (dq, *J* = 6.1, 1.1 Hz, 2H), 3.87 – 3.25 (m, 2H), 2.52 – 2.40 (m, 1H), 2.42 – 2.28 (m, 1H), 2.18 – 1.99 (m, 5H), 1.87 (ddd, *J* = 13.7, 9.6, 5.9 Hz, 1H). <sup>13</sup>C NMR (101 MHz, CDCl<sub>3</sub>) δ 174.99, 171.51, 171.21, 135.65, 132.12, 131.09, 128.31 (2C), 128.22 (2C), 126.89 (q, *J<sub>C-F</sub>* = 276.4 Hz, 1C), 120.47, 67.02, 55.42, 46.71, 31.71, 29.97 (q, *J<sub>C-F</sub>* = 29.0 Hz), 28.41 (q, *J<sub>C-F</sub>* = 3.3 Hz, 1C), 20.24. <sup>19</sup>F NMR (282 MHz, CDCl<sub>3</sub>) δ -66.79 (t, *J* = 10.1 Hz, 3F). IR (thin film, NaCl) 1735, 1685, 1451, 1393, 1276, 1256, 1147 cm<sup>-1</sup>. HRMS (APCI/ESI) *m/z* calc'd for C<sub>19</sub>H<sub>21</sub>F<sub>3</sub>NO<sub>4</sub> [M+H]<sup>+</sup>: 384.1417, found: 384.1414.

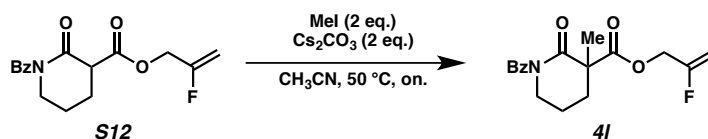

**2-Fluoroallyl 1-benzoyl-2-oxopiperidine-3-carboxylate (S12)** was synthesized using the same method with **S5** from **1-benzoylpiperidin-2-one** and **S4**. The crude oil was purified by column chromatography (SiO<sub>2</sub>, 100% CH<sub>2</sub>Cl<sub>2</sub>) to afford **S12** (482 mg, 53% yield) as a colorless oil; *R<sub>f</sub>* = 0.37 (3:1 Hexane:EtOAc); 93% purity, ketone form. <sup>1</sup>H NMR (500 MHz, CDCl<sub>3</sub>) δ 7.73 – 7.64 (m, 2H), 7.52 – 7.46 (m, 1H), 7.42 – 7.36 (m, 2H), 4.87 (ddd, *J* = 15.6, 3.4, 0.6 Hz, 1H), 4.78 – 4.64 (m, 3H), 3.95 – 3.78 (m, 2H), 3.64 (t, *J* = 6.6 Hz, 1H), 2.39 – 2.32 (m, 1H), 2.26 – 2.18 (m, 1H), 2.14 – 2.06 (m, 1H), 2.03 – 1.93 (m, 1H). <sup>13</sup>C NMR (101 MHz, CDCl<sub>3</sub>) δ 174.60, 169.34, 169.05, 159.56 (d, *J<sub>C-F</sub>* = 258.1 Hz, 1C), 135.46, 132.06, 128.33 (2C), 128.29 (2C), 95.53 (d, *J<sub>C-F</sub>* = 16.9 Hz, 1C), 62.51 (d, *J<sub>C-F</sub>* = 33.1 Hz, 1C), 51.03, 46.40, 25.59, 20.75. <sup>19</sup>F NMR (282 MHz, CDCl<sub>3</sub>) δ -105.57 (dq, *J* = 46.2, 15.1 Hz, 1F). IR (thin film, NaCl) 1744, 1682, 1449, 1394, 1283, 1257, 1151, 1114 cm<sup>-1</sup>. HRMS (APCI/ESI) *m/z* calc'd for C<sub>16</sub>H<sub>17</sub>FNO<sub>4</sub> [M+H]<sup>+</sup>: 306.1136, found: 306.1131.

**2-Fluoroallyl 1-benzoyl-3-methyl-2-oxopiperidine-3-carboxylate (4l)** was synthesized using the same method with **4e** from **S12**. The crude oil was purified by column chromatography (SiO<sub>2</sub>, 100% CH<sub>2</sub>Cl<sub>2</sub>) to afford **4l** (186 mg, 56% yield) as light yellow oil; *R<sub>f</sub>* = 0.30 (3:1 Hexane:EtOAc); <sup>1</sup>H NMR (500 MHz, CDCl<sub>3</sub>) δ 7.73 – 7.66 (m, 2H), 7.52 – 7.45 (m, 1H), 7.41 – 7.35 (m, 2H), 4.90 (dd, *J* = 15.5, 3.4 Hz, 1H), 4.82 – 4.63 (m, 3H), 3.89 (dt, *J* = 12.8, 7.1 Hz, 1H), 3.83 – 3.76 (m, 1H), 2.68 – 2.43 (m, 1H), 2.12 – 1.96 (m, 2H), 1.91 – 1.80 (m, 1H), 1.52 (s, 3H). <sup>13</sup>C NMR (101 MHz, CDCl<sub>3</sub>) δ 175.06, 172.57, 172.32, 159.58 (d, *J<sub>C-F</sub>* = 258.4 Hz, 1C), 135.91, 131.84, 128.22 (2C), 128.06 (2C), 95.76 (d, *J<sub>C-F</sub>* = 17.0 Hz, 1C), 62.63 (d, *J<sub>C-F</sub>* = 32.5 Hz, 1C), 52.99, 46.91, 33.87, 22.58, 20.25. <sup>19</sup>F NMR (282 MHz, CDCl<sub>3</sub>) δ -105.20 – -105.53 (m, 1F). IR (thin film, NaCl) 1718, 1684, 1458, 1390, 1276, 1189, 1127 cm<sup>-1</sup>; HRMS (APCI/ESI) *m/z* calc'd for C<sub>17</sub>H<sub>19</sub>FNO<sub>4</sub> [M+H]<sup>+</sup>: 320.1293, found: 320.1298.

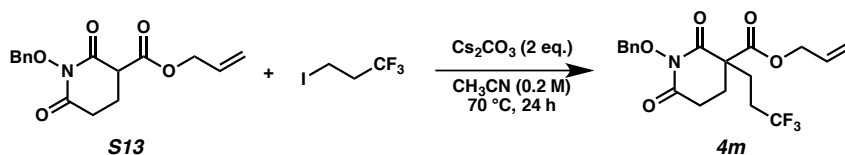

**Allyl 1-(benzyloxy)-2,6-dioxo-3-(3,3,3-trifluoropropyl)piperidine-3-carboxylate (4m)** was synthesized using the same method with **4h** from **allyl 1-(benzyloxy)-2,6-dioxopiperidine-3-carboxylate (S13)**<sup>13</sup> except that the temperature was 70 °C and reaction time was 24 hours. The crude oil was purified by column chromatography (SiO<sub>2</sub>, 50% EtOAc in hexane) to afford **4m** (120 mg, 30% yield) as a colorless oil; *R<sub>f</sub>* = 0.28 (3:1 Hexane: EtOAc); (99.7% purity determined by <sup>19</sup>F NMR). <sup>1</sup>H NMR (500 MHz, CDCl<sub>3</sub>) δ 7.53 – 7.49 (m, 2H), 7.40 – 7.34 (m, 3H), 5.87 (ddt, *J* = 16.5, 10.3, 6.0 Hz, 1H), 5.36 (dq, *J* = 17.2, 1.4 Hz, 1H), 5.32 (dq, *J* = 10.4, 1.1 Hz, 1H), 5.02 (s, 2H), 4.69 (d, *J* = 6.1 Hz, 2H), 2.81 (ddd, *J* = 18.1, 5.0, 3.3 Hz, 1H), 2.69 (ddd, *J* = 18.0, 12.6, 5.3 Hz, 1H), 2.49 – 2.30 (m, 1H), 2.29 – 1.98 (m, 4H), 1.90 (td, *J* = 13.2, 5.0 Hz, 1H). <sup>13</sup>C NMR (101 MHz, CDCl<sub>3</sub>) δ 169.37, 166.85, 166.65, 133.69, 130.52, 130.24 (2C), 129.44, 128.60 (2C), 126.64 (q, *J<sub>C-F</sub>* = 276.4 Hz, 1C), 120.74, 77.98, 67.29, 54.56, 30.21, 29.58 (q, *J<sub>C-F</sub>* = 29.5 Hz, 1C), 27.82 (q, *J<sub>C-F</sub>* = 3.3 Hz, 1C), 26.30. <sup>19</sup>F NMR (282 MHz, CDCl<sub>3</sub>) δ -66.78 (t, *J* = 10.1 Hz, 3F). IR (thin film, NaCl) 1738, 1710, 1454, 1258, 1189, 1160, 1000, 977 cm<sup>-1</sup>. HRMS (APCI/ESI) *m/z* calc'd for C<sub>19</sub>H<sub>21</sub>F<sub>3</sub>NO<sub>5</sub> [M+H]<sup>+</sup>: 400.1366, found: 400.1379.

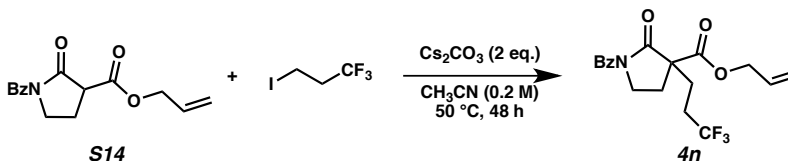

**Allyl 1-benzoyl-2-oxo-3-(3,3,3-trifluoropropyl)pyrrolidine-3-carboxylate (4n)** was synthesized using the same method with **4h** from **allyl 1-benzoyl-2-oxopyrrolidine-3-carboxylate (S14)**<sup>12</sup>. The crude oil was purified by column chromatography (SiO<sub>2</sub>, 25% EtOAc in hexane) to afford **4n** (170 mg, 46% yield) as a colorless oil; *R<sub>f</sub>* = 0.50 (3:1 Hexane: EtOAc); <sup>1</sup>H NMR (500 MHz, CDCl<sub>3</sub>) δ 7.62 – 7.59 (m, 2H), 7.57 – 7.52 (m, 1H), 7.44 – 7.39 (m, 2H), 5.92 (ddt, *J* = 17.1, 10.3, 5.8 Hz, 1H), 5.37 (dq, *J* = 17.1, 1.4 Hz, 1H), 5.32 (dq, *J* = 10.4, 1.2 Hz, 1H), 4.71 (dt, *J* = 5.8, 1.3 Hz, 2H), 4.08 (ddd, *J* = 11.4, 8.7, 3.6 Hz, 1H), 3.96 (ddd, *J* = 11.4, 8.2, 7.7 Hz, 1H), 2.63 (ddd, *J* = 13.3, 7.7, 3.7 Hz, 1H), 2.54 – 2.36 (m, 1H), 2.28 – 1.97 (m, 3H). <sup>13</sup>C NMR (101 MHz, CDCl<sub>3</sub>) δ 171.49, 170.34, 169.63, 133.73, 132.44, 130.95, 128.94 (2C), 128.05 (2C), 126.74 (q, *J<sub>C-F</sub>* = 276.0 Hz, 1C), 119.86, 66.89, 56.37, 43.49, 29.41 (q, *J<sub>C-F</sub>* = 29.4 Hz, 1C), 28.62, 26.64 (q, *J<sub>C-F</sub>* = 3.4 Hz, 1C). <sup>19</sup>F NMR (282 MHz, CDCl<sub>3</sub>) δ -66.79 (t, *J* = 9.9 Hz, 3F). IR (thin film, NaCl) 1748, 1731, 1682, 1449, 1293, 1253, 1218, 1131 cm<sup>-1</sup>. HRMS (APCI/ESI) *m/z* calc'd for C<sub>18</sub>H<sub>19</sub>F<sub>3</sub>NO<sub>4</sub> [M+H]<sup>+</sup>: 370.1261, found: 370.1254.

### Representative Procedure 1: Enantioselective Allylic Alkylation.

Oven-dried half-dram vials were charged with the palladium source (Pd<sub>2</sub>dba<sub>3</sub> or Pd<sub>2</sub>pmdba<sub>3</sub>, 0.005 mmol, 0.05 equiv) and (*S*)-(CF<sub>3</sub>)<sub>3</sub>-*t*Bu-PHOX (7.4 mg, 0.0125 mmol, 0.125 equiv) and toluene (2 mL) in a nitrogen-filled glovebox. After stirring at ambient glovebox temperature (~28 °C) for 30 min, solutions of the substrates (0.1 mmol, 1.0 equiv) in 1 mL of toluene were added. The reaction vials were tightly capped and removed from the glovebox. After 24 hours at ambient temperature or heating at the desired temperatures, the solvent was removed by vacuo. The crude mixture were separated on the preparative thin layer plate, filtered, washed with Et<sub>2</sub>O, removed solvent and analyzed for enantiomeric excess and optical rotations (see Methods for the Determination of Enantiomeric Excess).

## Representative Procedure 2: Racemic Allylic Alkylation.

Oven-dried half-dram vials were charged with the Pd(PPh<sub>3</sub>)<sub>4</sub> (0.1 equiv) and substrate (1.0 equiv) and toluene (0.1 M) in a nitrogen-filled glovebox. The reaction vials were tightly capped and removed from the glovebox. After 24 hours at ambient temperature or heating at the desired temperatures, the solvent was removed by vacuo. The crude mixture were separated on the preparative thin layer plate, filtered, washed with Et<sub>2</sub>O, removed solvent to give the desired racemic products.

## Representative Procedure 3: Racemic Allylic Alkylation.

Oven-dried half-dram vials were charged with the palladium source (Pd<sub>2</sub>dba<sub>3</sub> or Pd<sub>2</sub>pmdba<sub>3</sub>, 0.05 equiv) and Gly-PHOX (0.125 equiv) and toluene (0.1 M) in nitrogen-filled glovebox. After stirring at ambient glovebox temperature (~28 °C) for 30 min, solutions of the substrates (1.0 equiv) in toluene were added. The reaction vials were tightly capped and removed from the glovebox. After 24 hours at ambient temperature or heating at the desired temperatures, the solvent was removed by vacuo. The crude mixture were separated on the preparative thin layer plate, filtered, washed with Et<sub>2</sub>O, removed solvent to give desired racemic products.

## Representative Procedure 4: Preparatory Scale Reaction.

An oven-dried 250 mL Schlenck flask was charged with Pd<sub>2</sub>dba<sub>3</sub> (94 mg, 0.103 mmol, 0.05 equiv) and (*S*)-(CF<sub>3</sub>)<sub>3</sub>-*t*-Bu-PHOX (152 mg, 0.26 mmol, 0.125 equiv) and toluene (12 mL) in a nitrogen-filled glovebox. After stirring at ambient glovebox temperature (~28 °C) for 30 min, a solution of **4c** (512 mg, 2.06 mmol, 1.0 equiv) in 50 mL of toluene was added. The reaction vessel was sealed and removed from the glovebox. After 24 hours at ambient temperature the solvent was removed in vacuo. The product was purified by column chromatography (SiO<sub>2</sub>, 5% EtOAc in hexanes) to afford **5c** (419 mg, 99% yield, 92% ee).

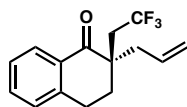

**(*S*)-2-allyl-2-(2,2,2-trifluoroethyl)-3,4-dihydronaphthalen-1(2*H*)-one (**5a**):** 26.5 mg, 99% yield; colorless oil; *R*<sub>f</sub> = 0.47 (10:1 Hexane:EtOAc); <sup>1</sup>H NMR (500 MHz, CDCl<sub>3</sub>) δ 8.07 (dd, *J* = 7.9, 1.4 Hz, 1H), 7.50 (app td, *J* = 7.5, 1.5 Hz, 1H), 7.33 (app t, *J* = 7.6 Hz, 1H), 7.24 (d, *J* = 7.8 Hz, 1H), 5.72 (ddt, *J* = 17.4, 10.1, 7.4 Hz, 1H), 5.19 (d, *J* = 10.1 Hz, 1H), 5.12 (dd, *J* = 16.9, 1.6 Hz, 1H), 3.14 (ddd, *J* = 16.9, 11.6, 4.9 Hz, 1H), 3.00 – 2.82 (m, 2H), 2.49 (dd, *J* = 14.3, 7.4 Hz, 1H), 2.41 – 2.24 (m, 3H), 2.17 (dt, *J* = 14.0, 4.4 Hz, 1H). <sup>13</sup>C NMR (101 MHz, CDCl<sub>3</sub>) δ 198.27, 142.73, 133.72, 132.15, 130.92, 128.88, 128.58, 127.08, 126.79 (q, *J*<sub>C-F</sub> = 277.8 Hz, 1C), 120.17, 45.95, 38.58, 37.54 (d, *J*<sub>C-F</sub> = 28.8 Hz, 1C), 29.60 (q, *J*<sub>C-F</sub> = 1.7 Hz, 1C), 24.88. <sup>19</sup>F NMR (282 MHz, CDCl<sub>3</sub>) δ -58.69 (t, *J* = 11.7 Hz, 3F). IR (thin film, NaCl) 1683, 1600, 1256, 1130, 740 cm<sup>-1</sup>. HRMS (FAB) *m/z* calc'd for C<sub>15</sub>H<sub>16</sub>F<sub>3</sub>O [M+H]<sup>+</sup>: 269.1148, found: 269.1159.

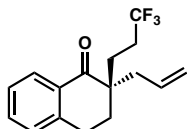

**(*R*)-2-allyl-2-(3,3,3-trifluoropropyl)-3,4-dihydronaphthalen-1(2*H*)-one (**5b**):** 27.4 mg, 97% yield; colorless oil; *R*<sub>f</sub> = 0.50 (10:1 Hexane:EtOAc); <sup>1</sup>H NMR (500 MHz, CDCl<sub>3</sub>) δ 8.04 (ddd, *J* = 7.9, 1.4, 0.5 Hz, 1H), 7.49 (app td, *J* = 7.5, 1.5 Hz, 1H), 7.32 (app t, *J* = 7.6 Hz, 1H), 7.24 (d, *J* = 7.5 Hz, 1H), 5.75 (ddt, *J* = 16.8, 10.2, 7.4 Hz, 1H), 5.23 – 5.04 (m, 2H), 3.07 (ddd, *J* = 17.5, 7.9, 5.6 Hz, 1H), 2.99 (dt, *J* = 17.5, 6.0 Hz, 1H), 2.45 (ddt, *J* = 14.2, 7.3, 1.2 Hz, 1H), 2.33 (ddt, *J* = 14.1, 7.4, 1.2 Hz, 1H), 2.24 – 2.01

(m, 4H), 1.97 (td,  $J = 13.7, 4.4$  Hz, 1H), 1.79 (td,  $J = 13.5, 4.2$  Hz, 1H).  $^{13}\text{C}$  NMR (101 MHz,  $\text{CDCl}_3$ )  $\delta$  200.39, 142.94, 133.64, 132.82, 131.53, 128.91, 128.23, 127.42 (q,  $J_{\text{C-F}} = 276.9$  Hz, 1C), 127.02, 119.27, 46.63, 38.72, 31.04, 28.93 (q,  $J_{\text{C-F}} = 28.8$  Hz, 1C), 26.54 (q,  $J_{\text{C-F}} = 3.3$  Hz, 1C), 24.99.  $^{19}\text{F}$  NMR (282 MHz,  $\text{CDCl}_3$ )  $\delta$  -66.62 (t,  $J = 10.4$  Hz, 3F). IR (thin film, NaCl) 1682, 1601, 1259, 1136, 743  $\text{cm}^{-1}$ . HRMS (APCI/ESI)  $m/z$  calc'd for  $\text{C}_{16}\text{H}_{18}\text{F}_3\text{O}$   $[\text{M}+\text{H}]^+$ : 283.1304, found: 283.1305.

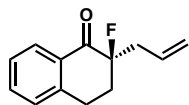

**(R)-2-allyl-2-fluoro-3,4-dihydronaphthalen-1(2H)-one (5c)**<sup>14,15</sup>: 20.3 mg, 99% yield; colorless oil;  $R_f = 0.28$  (10:1 Hexane:EtOAc);  $^1\text{H}$  NMR (500 MHz,  $\text{CDCl}_3$ )  $\delta$  8.06 (dd,  $J = 7.8, 1.4$  Hz, 1H), 7.52 (app td,  $J = 7.5, 1.5$  Hz, 1H), 7.35 (app td,  $J = 7.5, 1.1$  Hz, 1H), 7.28 – 7.24 (m, 1H), 5.95 – 5.84 (m, 1H), 5.25 – 5.07 (m, 2H), 3.19 – 3.07 (m, 1H), 3.02 (ddd,  $J = 17.3, 9.6, 5.3$  Hz, 1H), 2.77 – 2.66 (m, 1H), 2.64 – 2.49 (m, 1H), 2.48 – 2.26 (m, 2H).  $^{13}\text{C}$  NMR (101 MHz,  $\text{CDCl}_3$ )  $\delta$  194.12 (d,  $J_{\text{C-F}} = 17.6$  Hz, 1C), 142.82, 134.20, 130.97 (d,  $J_{\text{C-F}} = 4.1$  Hz, 1C), 128.87, 128.40, 128.39, 127.23, 120.01, 95.11 (d,  $J_{\text{C-F}} = 185.0$  Hz, 1C), 38.09 (d,  $J_{\text{C-F}} = 23.5$  Hz, 1C), 32.01 (d,  $J_{\text{C-F}} = 22.6$  Hz, 1C), 26.01 (d,  $J_{\text{C-F}} = 10.1$  Hz, 1C).  $^{19}\text{F}$  NMR (282 MHz,  $\text{CDCl}_3$ )  $\delta$  -159.85 – -160.09 (m, 1F). IR (thin film, NaCl) 1678, 1602, 1221, 930, 741  $\text{cm}^{-1}$ . HRMS (APCI/ESI)  $m/z$  calc'd for  $\text{C}_{13}\text{H}_{14}\text{FO}$   $[\text{M}+\text{H}]^+$ : 205.1023, found: 205.1023.

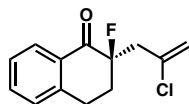

**(R)-2-(2-chloroallyl)-2-fluoro-3,4-dihydronaphthalen-1(2H)-one (5d)**: 22.9 mg, 96% yield; colorless oil;  $R_f = 0.43$  (10:1 Hexane:EtOAc);  $^1\text{H}$  NMR (500 MHz,  $\text{CDCl}_3$ )  $\delta$  8.06 (dd,  $J = 7.8, 1.3$  Hz, 1H), 7.54 (app td,  $J = 7.5, 1.5$  Hz, 1H), 7.36 (app t,  $J = 7.8$  Hz, 1H), 7.28 (d,  $J = 7.8$  Hz, 1H), 5.45 (d,  $J = 1.2$  Hz, 1H), 5.39 (d,  $J = 0.7$  Hz, 1H), 3.24 – 3.01 (m, 3H), 2.90 (dd,  $J = 27.4, 15.3$  Hz, 1H), 2.60 – 2.42 (m, 2H).  $^{13}\text{C}$  NMR (101 MHz,  $\text{CDCl}_3$ )  $\delta$  192.92 (d,  $J_{\text{C-F}} = 18.5$  Hz, 1C), 142.94, 134.78 (d,  $J_{\text{C-F}} = 2.6$  Hz, 1C), 134.41, 130.74, 128.88, 128.60 (d,  $J_{\text{C-F}} = 1.2$  Hz, 1C), 127.31, 118.62 (d,  $J_{\text{C-F}} = 1.1$  Hz, 1C), 94.03 (d,  $J_{\text{C-F}} = 185.8$  Hz, 1C), 42.67 (d,  $J_{\text{C-F}} = 24.4$  Hz, 1C), 31.69 (d,  $J_{\text{C-F}} = 22.3$  Hz, 1C), 26.00 (d,  $J_{\text{C-F}} = 9.9$  Hz, 1C).  $^{19}\text{F}$  NMR (282 MHz,  $\text{CDCl}_3$ )  $\delta$  -158.17 – -158.43 (m, 1F). IR (thin film, NaCl) 1680, 1631, 1602, 1223, 743  $\text{cm}^{-1}$ . HRMS (APCI/ESI)  $m/z$  calc'd for  $\text{C}_{13}\text{H}_{13}\text{ClFO}$   $[\text{M}+\text{H}]^+$ : 239.0633, found: 239.0633.

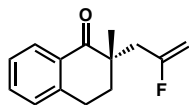

**(S)-2-(2-fluoroallyl)-2-methyl-3,4-dihydronaphthalen-1(2H)-one (5e)**: 20.0 mg, 92% yield; colorless oil;  $R_f = 0.53$  (10:1 Hexane:EtOAc);  $^1\text{H}$  NMR (500 MHz,  $\text{CDCl}_3$ )  $\delta$  8.04 (dd,  $J = 7.9, 1.4$  Hz, 1H), 7.47 (app td,  $J = 7.4, 1.5$  Hz, 1H), 7.31 (app t,  $J = 7.5$  Hz, 1H), 7.23 (d,  $J = 7.7$  Hz, 1H), 4.64 (dd,  $J = 17.2, 2.6$  Hz, 1H), 4.32 (dd,  $J = 49.5, 2.6$  Hz, 1H), 3.09 – 2.94 (m, 2H), 2.66 (dd,  $J = 20.5, 14.6$  Hz, 1H), 2.50 (dd,  $J = 25.1, 14.6$  Hz, 1H), 2.17 (dddd,  $J = 14.4, 9.1, 5.2, 1.3$  Hz, 1H), 2.04 (dddd,  $J = 13.8, 6.0, 5.0, 1.1$  Hz, 1H), 1.26 (d,  $J = 0.9$  Hz, 3H).  $^{13}\text{C}$  NMR (101 MHz,  $\text{CDCl}_3$ )  $\delta$  201.14, 164.07 (d,  $J_{\text{C-F}} = 157.8$  Hz, 1C), 143.28, 133.41, 131.34, 128.81, 128.28, 126.86, 93.85 (d,  $J_{\text{C-F}} = 20.2$  Hz, 1C), 44.26 (d,  $J_{\text{C-F}} = 3.3$  Hz, 1C), 39.39 (d,  $J_{\text{C-F}} = 25.7$  Hz, 1C), 33.30 (d,  $J_{\text{C-F}} = 1.8$  Hz, 1C), 25.48, 21.94 (d,  $J_{\text{C-F}} = 1.5$  Hz, 1C).  $^{19}\text{F}$  NMR (282 MHz,  $\text{CDCl}_3$ )  $\delta$  -88.59 – -88.99 (m, 1F). IR (thin film, NaCl) 1680, 1601, 1222, 741  $\text{cm}^{-1}$ . HRMS (APCI/ESI)  $m/z$  calc'd for  $\text{C}_{14}\text{H}_{16}\text{FO}$   $[\text{M}+\text{H}]^+$ : 219.1180, found: 219.1185.

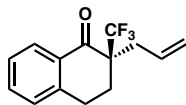

**(R)-2-allyl-2-(trifluoromethyl)-3,4-dihydronaphthalen-1(2H)-one (5f)**<sup>9</sup>: 22.8 mg, 90% yield; colorless oil;  $R_f = 0.36$  (10:1 Hexane:EtOAc);  $^1\text{H}$  NMR (500 MHz,  $\text{CDCl}_3$ )  $\delta$  8.07 (dd,  $J = 7.9, 1.4$  Hz, 1H), 7.51 (app td,  $J = 7.5, 1.5$  Hz, 1H), 7.34 (app t,  $J = 7.6$  Hz, 1H), 7.25 (d,  $J = 7.9$  Hz, 1H), 5.87 – 5.65 (m, 1H), 5.21 – 5.11 (m, 2H), 3.10 (dt,  $J = 17.5, 6.7$  Hz, 1H), 3.02 (dt,  $J = 17.3, 6.1$  Hz, 1H), 2.76 (dd,  $J = 14.3, 7.3$  Hz, 1H), 2.59 (dd,  $J = 14.3, 2.6$  Hz, 1H), 2.43 – 2.25 (m, 2H).  $^{13}\text{C}$  NMR (101 MHz,  $\text{CDCl}_3$ )  $\delta$  192.89, 143.09, 134.20, 131.84, 131.57 (d,  $J = 1.5$  Hz), 128.88, 128.50, 127.18, 126.57 (q,  $J_{\text{C-F}} = 285.3$  Hz, 1C), 120.08, 53.58 (q,  $J_{\text{C-F}} = 22.3$  Hz, 1C), 35.56 (q,  $J_{\text{C-F}} = 2.2$  Hz, 1C), 26.47 (q,  $J_{\text{C-F}} = 2.0$  Hz, 1C), 24.71.  $^{19}\text{F}$  NMR (282 MHz,  $\text{CDCl}_3$ )  $\delta$  -69.26 (s, 3F). IR (thin film, NaCl) 1688, 1601, 1161, 741  $\text{cm}^{-1}$ .

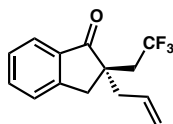

**(R)-2-allyl-2-(2,2,2-trifluoroethyl)-2,3-dihydro-1H-inden-1-one (5g)**: 21.8 mg, 86% yield; colorless oil;  $R_f = 0.40$  (10:1 Hexane:EtOAc);  $^1\text{H}$  NMR (500 MHz,  $\text{CDCl}_3$ )  $\delta$  7.77 (d,  $J = 7.7$  Hz, 1H), 7.62 (app td,  $J = 7.5, 1.2$  Hz, 1H), 7.45 (d,  $J = 7.7$  Hz, 1H), 7.40 (app t,  $J = 7.4$  Hz, 1H), 5.58 – 5.47 (m, 1H), 5.19 – 4.96 (m, 2H), 3.36 (d,  $J = 17.6$  Hz, 1H), 3.14 (d,  $J = 17.6$  Hz, 1H), 2.64 – 2.48 (m, 2H), 2.45 (dd,  $J = 13.7, 6.7$  Hz, 1H), 2.34 (dd,  $J = 13.7, 8.0$  Hz, 1H).  $^{13}\text{C}$  NMR (101 MHz,  $\text{CDCl}_3$ )  $\delta$  207.28, 152.43, 135.55, 135.38, 131.99, 127.87, 126.60 (q,  $J_{\text{C-F}} = 278.7$  Hz, 1C), 126.59, 124.51, 119.93, 49.03 (d,  $J_{\text{C-F}} = 1.7$  Hz, 1C), 42.44, 39.20 (q,  $J_{\text{C-F}} = 27.7$  Hz, 1C), 36.24 (q,  $J_{\text{C-F}} = 1.9$  Hz, 1C).  $^{19}\text{F}$  NMR (282 MHz,  $\text{CDCl}_3$ )  $\delta$  -59.71 (t,  $J = 11.3$  Hz, 3F). IR (thin film, NaCl) 1715, 1608, 1258, 1122  $\text{cm}^{-1}$ . HRMS (FAB<sup>+</sup>)  $m/z$  calc'd for  $\text{C}_{14}\text{H}_{14}\text{F}_3\text{O}$  [ $\text{M}+\text{H}^+$ ]: 255.0991, found: 255.0995.

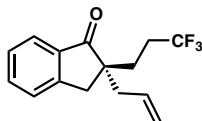

**(R)-2-allyl-2-(3,3,3-trifluoropropyl)-2,3-dihydro-1H-inden-1-one (5h)**: 24.8 mg, 92% yield; colorless oil;  $R_f = 0.41$  (10:1 Hexane:EtOAc);  $^1\text{H}$  NMR (500 MHz,  $\text{CDCl}_3$ )  $\delta$  7.75 (app dt,  $J = 7.6, 0.9$  Hz, 1H), 7.62 (app td,  $J = 7.5, 1.2$  Hz, 1H), 7.45 (app dt,  $J = 7.7, 0.9$  Hz, 1H), 7.39 (app t,  $J = 7.6$  Hz, 1H), 5.53 (dddd,  $J = 16.8, 10.1, 8.0, 6.7$  Hz, 1H), 5.12 (dq,  $J = 16.9, 1.5$  Hz, 1H), 5.03 (dd,  $J = 10.1, 1.0$  Hz, 1H), 3.17 (dd,  $J = 17.4, 0.9$  Hz, 1H), 2.91 (d,  $J = 17.4$  Hz, 1H), 2.42 (ddt,  $J = 13.7, 6.6, 1.3$  Hz, 1H), 2.34 (ddt,  $J = 13.7, 8.1, 1.0$  Hz, 1H), 2.16 – 1.90 (m, 3H), 1.86 – 1.74 (m, 1H).  $^{13}\text{C}$  NMR (101 MHz,  $\text{CDCl}_3$ )  $\delta$  209.23, 152.52, 136.37, 135.51, 132.76, 127.92, 127.09 (q,  $J_{\text{C-F}} = 276.0$  Hz, 1C), 126.67, 124.31, 119.33, 50.95, 41.37, 37.27, 31.54 – 27.19 (m, 2C).  $^{19}\text{F}$  NMR (282 MHz,  $\text{CDCl}_3$ )  $\delta$  -66.65 (t,  $J = 10.3$  Hz, 3F). IR (thin film, NaCl) 1709, 1608, 1256, 1150  $\text{cm}^{-1}$ . HRMS (APCI/ESI)  $m/z$  calc'd for  $\text{C}_{15}\text{H}_{16}\text{F}_3\text{O}$  [ $\text{M}+\text{H}^+$ ]: 269.1148, found: 269.1158.

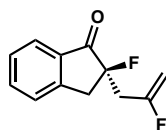

**(R)-2-fluoro-2-(2-fluoroallyl)-2,3-dihydro-1H-inden-1-one (5i):** 20.0 mg, 96% yield; colorless oil;  $R_f$  = 0.30 (5:1 Hexane:EtOAc);  $^1\text{H}$  NMR (500 MHz,  $\text{CDCl}_3$ )  $\delta$  7.82 (ddd,  $J$  = 7.7, 1.3, 0.7 Hz, 1H), 7.67 (App td,  $J$  = 7.5, 1.3 Hz, 1H), 7.50 – 7.40 (m, 2H), 4.71 (dd,  $J$  = 17.0, 3.0 Hz, 1H), 4.48 (dd,  $J$  = 49.1, 3.0 Hz, 1H), 3.61 (ddt,  $J$  = 17.8, 13.7, 0.7 Hz, 1H), 3.40 (dd,  $J$  = 23.7, 17.8 Hz, 1H), 3.00 (ddd,  $J$  = 22.5, 15.1, 10.7 Hz, 1H), 2.77 – 2.63 (m, 1H).  $^{13}\text{C}$  NMR (101 MHz,  $\text{CDCl}_3$ )  $\delta$  199.64 (d,  $J_{\text{C-F}}$  = 17.6 Hz, 1C), 160.59 (dd,  $J_{\text{C-F}}$  = 257.4, 7.6 Hz, 1C), 150.61 (d,  $J_{\text{C-F}}$  = 3.4 Hz, 1C), 136.67, 133.63 (d,  $J_{\text{C-F}}$  = 1.2 Hz, 1C), 128.49, 126.85 (d,  $J_{\text{C-F}}$  = 1.2 Hz, 1C), 125.33, 95.17 (dd,  $J_{\text{C-F}}$  = 18.7, 1.3 Hz, 1C), 94.75 (dd,  $J_{\text{C-F}}$  = 188.4, 2.4 Hz, 1C), 37.73 (dd,  $J_{\text{C-F}}$  = 24.6, 2.3 Hz, 1C), 37.28 (t,  $J_{\text{C-F}}$  = 27.1 Hz, 1C).  $^{19}\text{F}$  NMR (282 MHz,  $\text{CDCl}_3$ )  $\delta$  -92.01 – -92.40 (m, 1F), -154.37 – -154.65 (m, 1F). IR (thin film, NaCl) 1732, 1608, 1227, 730  $\text{cm}^{-1}$ . HRMS (APCI/ESI)  $m/z$  calc'd for  $\text{C}_{12}\text{H}_{11}\text{F}_2\text{O}$   $[\text{M}+\text{H}]^+$ : 209.0772, found: 209.0770.

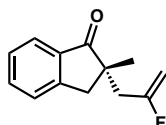

**(S)-2-(2-fluoroallyl)-2-methyl-2,3-dihydro-1H-inden-1-one (5j):** 21.8 mg, 97% yield; colorless oil;  $R_f$  = 0.33 (10:1 Hexane:EtOAc);  $^1\text{H}$  NMR (500 MHz,  $\text{CDCl}_3$ )  $\delta$  7.76 (dt,  $J$  = 7.6, 1.0 Hz, 1H), 7.60 (app td,  $J$  = 7.4, 1.2 Hz, 1H), 7.44 (dt,  $J$  = 7.7, 1.0 Hz, 1H), 7.38 (app td,  $J$  = 7.4, 0.9 Hz, 1H), 4.58 (ddd,  $J$  = 17.3, 2.8, 0.7 Hz, 1H), 4.30 (ddd,  $J$  = 49.6, 2.8, 0.7 Hz, 1H), 3.36 (d,  $J$  = 17.3 Hz, 1H), 2.93 (d,  $J$  = 17.3 Hz, 1H), 2.58 – 2.45 (m, 2H), 1.25 (s, 3H).  $^{13}\text{C}$  NMR (101 MHz,  $\text{CDCl}_3$ )  $\delta$  209.74, 164.02 (d,  $J_{\text{C-F}}$  = 258.2 Hz, 1C), 152.63, 135.20, 127.66, 126.76, 124.62, 93.46 (d,  $J_{\text{C-F}}$  = 19.9 Hz, 1C), 47.85 (d,  $J_{\text{C-F}}$  = 2.8 Hz, 1C), 43.62 – 34.74 (m, 2C), 24.19.  $^{19}\text{F}$  NMR (282 MHz,  $\text{CDCl}_3$ )  $\delta$  -91.35 – -91.74 (m, 1F). IR (thin film, NaCl) 1732, 1608, 1227, 730  $\text{cm}^{-1}$ . HRMS (APCI/ESI)  $m/z$  calc'd for  $\text{C}_{13}\text{H}_{14}\text{FO}$   $[\text{M}+\text{H}]^+$ : 205.1023, found: 205.1022.

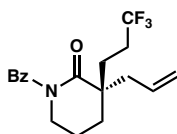

**(R)-3-allyl-1-benzoyl-3-(3,3,3-trifluoropropyl)piperidin-2-one (5k):** 27.4 mg, 94% yield; colorless oil;  $R_f$  = 0.37 (3:1 Hexane:EtOAc);  $^1\text{H}$  NMR (500 MHz,  $\text{CDCl}_3$ )  $\delta$  7.55 – 7.47 (m, 3H), 7.40 – 7.38 (m, 2H), 5.72 (ddt,  $J$  = 17.4, 10.2, 7.3 Hz, 1H), 5.22 – 5.15 (m, 2H), 3.84 – 3.71 (m, 2H), 2.55 (ddt,  $J$  = 13.9, 7.2, 1.2 Hz, 1H), 2.38 (ddt,  $J$  = 13.9, 7.5, 1.2 Hz, 1H), 2.21 – 1.93 (m, 5H), 1.93 – 1.86 (m, 2H), 1.84 – 1.77 (m, 1H).  $^{13}\text{C}$  NMR (101 MHz,  $\text{CDCl}_3$ )  $\delta$  177.21, 175.61, 136.46, 132.11, 131.79, 128.44 (2C), 127.47 (2C), 127.23 (q,  $J_{\text{C-F}}$  = 276.9 Hz, 1C), 120.09, 47.20, 46.09, 41.13, 31.62, 29.32, 29.13 (q,  $J_{\text{C-F}}$  = 28.8 Hz, 1C), 19.41.  $^{19}\text{F}$  NMR (282 MHz,  $\text{CDCl}_3$ )  $\delta$  -66.53 (t,  $J$  = 10.5 Hz, 3F). IR (thin film, NaCl) 2950, 1682, 1258, 1149  $\text{cm}^{-1}$ ; HRMS (APCI/ESI)  $m/z$  calc'd for  $\text{C}_{18}\text{H}_{21}\text{F}_3\text{NO}_2$   $[\text{M}+\text{H}]^+$ : 340.1519, found: 340.1519.

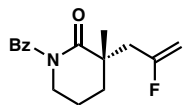

**(S)-1-benzoyl-3-(2-fluoroallyl)-3-methylpiperidin-2-one (5l):** 23.5 mg, 85% yield; colorless oil;  $R_f = 0.52$  (3:1 Hexane:EtOAc);  $^1\text{H}$  NMR (500 MHz,  $\text{CDCl}_3$ )  $\delta$  7.55 – 7.50 (m, 2H), 7.49 – 7.44 (m, 1H), 7.41 – 7.35 (m, 2H), 4.67 (ddd,  $J = 17.3, 2.7, 0.7$  Hz, 1H), 4.32 (ddd,  $J = 49.7, 2.7, 0.5$  Hz, 1H), 4.00 – 3.84 (m, 1H), 3.79 – 3.62 (m, 1H), 2.76 (dd,  $J = 19.4, 14.6$  Hz, 1H), 2.41 (ddd,  $J = 24.8, 14.6, 0.8$  Hz, 1H), 2.19 – 1.95 (m, 3H), 1.93 – 1.75 (m, 1H), 1.42 (s, 3H).  $^{13}\text{C}$  NMR (101 MHz,  $\text{CDCl}_3$ )  $\delta$  176.80 (d,  $J_{\text{C-F}} = 289.8$  Hz, 1C), 163.47 (d,  $J_{\text{C-F}} = 258.1$  Hz, 1C), 136.47, 131.55, 128.28 (2C), 127.52 (2C), 94.42 (d,  $J_{\text{C-F}} = 20.0$  Hz, 1C), 47.16, 43.60 (d,  $J_{\text{C-F}} = 3.1$  Hz, 1C), 41.10 (d,  $J_{\text{C-F}} = 25.5$  Hz, 1C), 33.28 (d,  $J_{\text{C-F}} = 1.9$  Hz, 1C), 25.83 (d,  $J_{\text{C-F}} = 1.5$  Hz, 1C), 19.72.  $^{19}\text{F}$  NMR (282 MHz,  $\text{CDCl}_3$ )  $\delta$  -89.31 – 89.70 (m, 1F). IR (thin film, NaCl) 2942, 1697, 1672, 1277, 1144  $\text{cm}^{-1}$ . HRMS (APCI/ESI)  $m/z$  calc'd for  $\text{C}_{16}\text{H}_{19}\text{FNO}_2$   $[\text{M}+\text{H}]^+$ : 276.1394, found: 276.1397.

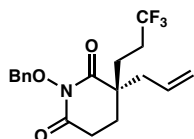

**(R)-3-allyl-1-(benzyloxy)-3-(3,3,3-trifluoropropyl)piperidine-2,6-dione (5m):** 33.0 mg, 93% yield; colorless oil;  $R_f = 0.24$  (3:1 Hexane:EtOAc);  $^1\text{H}$  NMR (500 MHz,  $\text{CDCl}_3$ )  $\delta$  7.51 – 7.46 (m, 2H), 7.40 – 7.34 (m, 3H), 5.61 (ddt,  $J = 17.4, 10.1, 7.4$  Hz, 1H), 5.25 – 5.06 (m, 2H), 5.02 (s, 2H), 2.83 – 2.70 (m, 2H), 2.39 (ddt,  $J = 14.2, 7.3, 1.2$  Hz, 1H), 2.30 (ddt,  $J = 14.2, 7.4, 1.1$  Hz, 1H), 2.09 – 1.94 (m, 2H), 1.90 – 1.80 (m, 2H), 1.78 – 1.66 (m, 2H).  $^{13}\text{C}$  NMR (101 MHz,  $\text{CDCl}_3$ )  $\delta$  171.63, 167.45, 133.67, 131.03, 130.38 (2C), 129.45, 128.54 (2C), 126.88 (q,  $J_{\text{C-F}} = 275.9$  Hz, 1C), 120.75, 78.04, 45.18, 39.76, 29.22, 28.75 (q,  $J_{\text{C-F}} = 29.2$  Hz, 1C), 27.76 (q,  $J = 3.0$  Hz, 1C), 25.35.  $^{19}\text{F}$  NMR (282 MHz,  $\text{CDCl}_3$ )  $\delta$  -66.56 (t,  $J = 10.1$  Hz, 3F). IR (thin film, NaCl) 1741, 1702, 1258, 1184  $\text{cm}^{-1}$ . HRMS (APCI/ESI)  $m/z$  calc'd for  $\text{C}_{18}\text{H}_{21}\text{F}_3\text{NO}_3$   $[\text{M}+\text{H}]^+$ : 356.1468, found: 356.1470.

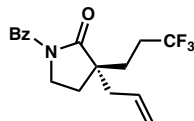

**(R)-3-allyl-1-benzoyl-3-(3,3,3-trifluoropropyl)pyrrolidin-2-one (5n):** 26.7 mg, 82% yield; colorless oil;  $R_f = 0.35$  (5:1 Hexane:EtOAc);  $^1\text{H}$  NMR (500 MHz,  $\text{CDCl}_3$ )  $\delta$  7.58 – 7.51 (m, 3H), 7.45 – 7.39 (m, 2H), 5.76 (dddd,  $J = 17.1, 10.2, 7.8, 7.0$  Hz, 1H), 5.29 – 5.16 (m, 2H), 3.96 – 3.85 (m, 2H), 2.38 (ddt,  $J = 13.8, 7.0, 1.3$  Hz, 1H), 2.34 – 2.28 (m, 1H), 2.28 – 2.06 (m, 3H), 1.95 (ddd,  $J = 13.3, 8.3, 6.4$  Hz, 1H), 1.86 – 1.81 (m, 2H).  $^{13}\text{C}$  NMR (101 MHz,  $\text{CDCl}_3$ )  $\delta$  176.93, 170.74, 134.18, 132.23, 131.91, 128.90 (2C), 128.00 (2C), 127.0 (q,  $J_{\text{C-F}} = 276.9$  Hz, 1C), 120.39, 48.44, 42.96, 39.93, 28.94 (q,  $J_{\text{C-F}} = 29.2$  Hz, 1C), 28.02 (q,  $J_{\text{C-F}} = 3.0$  Hz, 1C), 27.60.  $^{19}\text{F}$  NMR (282 MHz,  $\text{CDCl}_3$ )  $\delta$  -66.60 (t,  $J = 10.4$  Hz, 3F). IR (thin film, NaCl) 1738, 1678, 1305, 1258, 1138  $\text{cm}^{-1}$ . HRMS (APCI/ESI)  $m/z$  calc'd for  $\text{C}_{17}\text{H}_{19}\text{F}_3\text{NO}_2$   $[\text{M}+\text{H}]^+$ : 326.1362, found: 326.1352.

## Methods for the Determination of Enantiomeric Excess (ee) & Optical Rotation:

|    | products | assigned as | assay conditions                                                                             | ee (%) | $[\alpha]_D^{25}$<br>( $c = 1, \text{CHCl}_3$ ) |
|----|----------|-------------|----------------------------------------------------------------------------------------------|--------|-------------------------------------------------|
| 5a |          |             | SFC, Chiralcel OD-H<br>0% IPA isocratic, 2.5 mL/min<br>t (major) = 9.21<br>t (minor) = 8.65  | 90     | -21.307                                         |
| 5b |          |             | SFC, Chiralcel OD-H<br>1% IPA isocratic, 2.5 mL/min<br>t (major) = 5.71<br>t (minor) = 8.86  | 92     | +0.267                                          |
| 5c |          |             | SFC, Chiralcel OJ-H<br>0% IPA isocratic, 2.5 mL/min<br>t (major) = 6.38<br>t (minor) = 5.98  | 93     | -28.692                                         |
| 5d |          |             | SFC, Chiralpak AD-H<br>3% IPA isocratic, 2.5 mL/min<br>t (major) = 9.73<br>t (minor) = 11.11 | 95     | -32.885                                         |
| 5e |          |             | SFC, Chiralpak IC<br>5% IPA isocratic, 2.5 mL/min<br>t (major) = 4.78<br>t (minor) = 4.21    | 85     | -9.688                                          |
| 5f |          |             | SFC, Chiralpak AD-H<br>5% IPA isocratic, 2.5 mL/min<br>t (major) = 2.72<br>t (minor) = 3.04  | 64     | -31.191                                         |
| 5g |          |             | SFC, Chiralpak AS-H<br>0% IPA isocratic, 2.5 mL/min<br>t (major) = 2.81<br>t (minor) = 2.55  | 90     | -25.986                                         |
| 5h |          |             | SFC, Chiralpak AD-H<br>3% IPA isocratic, 2.5 mL/min<br>t (major) = 3.85<br>t (minor) = 3.16  | 87     | -28.049                                         |
| 5i |          |             | SFC, Chiralpak AD-H<br>5% IPA isocratic, 2.5 mL/min<br>t (major) = 2.98<br>t (minor) = 3.54  | 79     | -85.633                                         |
| 5j |          |             | SFC, Chiralpak IC<br>3% IPA isocratic, 2.5 mL/min<br>t (major) = 8.09<br>t (minor) = 7.23    | 74     | -58.663                                         |
| 5k |          |             | SFC, Chiralpak AD-H<br>5% IPA isocratic, 2.5 mL/min<br>t (major) = 6.15<br>t (minor) = 4.63  | 89     | -5.691                                          |
| 5l |          |             | SFC, Chiralpak AD-H<br>5% IPA isocratic, 2.5 mL/min<br>t (major) = 9.04<br>t (minor) = 11.38 | 97     | -65.009                                         |
| 5m |          |             | SFC, Chiralcel OJ-H<br>3% IPA isocratic, 2.5 mL/min<br>t (major) = 10.67<br>t (minor) = 9.86 | 89     | +3.302                                          |
| 5n |          |             | SFC, Chiralpak AD-H<br>10% IPA isocratic, 2.5 mL/min<br>t (major) = 2.28<br>t (minor) = 3.25 | 79     | -14.268                                         |

## References and Notes

1. Pangborn, A. M.; Giardello, M. A.; Grubbs, R. H.; Rosen, R. K.; Timmers, F. *J. Organometallics* **1996**, *15*, 1518–1520.
2. Firmansjah, L.; Fu, G. C. *J. Am. Chem. Soc.*, **2007**, *129*, 11340–11341.
3. Krout, M. R.; Mohr, J. T.; Stoltz, B. M. *Org. Synth.* **2009**, *86*, 181–205.
4. McDougal, N. T.; Streuff, J.; Mukherjee, H.; Virgil, S. C.; Stoltz, B. M. *Tetrahedron Lett.* **2010**, *51*, 5550–5554.
5. Rambla, M.; Durore, L.; Chabaud, L.; Guillou, C. *Eur. J. Org. Chem.* **2014**, 7716–7720.
6. Tolnai, G. L.; Szekeley, S.; Mako, Z.; Gati, T.; Daru, J.; Bihari, T.; Stirling, A.; Novak, Z. *Chem. Commun.*, **2015**, *51*, 4488–4491.
7. Mohr, J. T.; Nishimata, T.; Behenna, D. C.; Stoltz, B. M. *J. Am. Chem. Soc.* **2006**, *128*, 11348–11349.
8. King, S.; Ma, X.; Herzon, S. B. *J. Am. Chem. Soc.* **2014**, *136*, 6884–6887.
9. Shibata, N.; Suzuki, S.; Furukawa, T.; Kawai, H.; Tokunaga, E.; Yuan, Z.; Cahard, D. *Adv. Synth. Catal.* **2011**, *353*, 2037–2041.
10. Smith, A. M. R.; Rzepa, H. S.; White, A. J. P.; Billen, D.; Hii, K. K. *J. Org. Chem.* **2010**, *75*, 3085–3096.
11. Craig, R. A.; Loskot, S. A.; Mohr, J. T.; Behenna, D. C.; Harned, A. M.; Stoltz, B. M. *Org. Lett.* **2015**, *17*, 5160–5163.
12. Behenna, D. C.; Liu, Y.; Yurino, T.; Kim, J.; White, D. E.; Virgil, S. C.; Stoltz, B. M. *Nature Chem.* **2012**, *4*, 130–133.
13. Bennett, N. B.; Duquette, D. C.; Kim, J.; Liu, W.; Marziale, A. N.; Behenna, D. C.; Virgil, S. C.; Stoltz, B. M. *Chem. Eur. J.* **2013**, *19*, 4414–4418.
14. Bélanger, É.; Cantin, K.; Messe, O.; Tremblay, M.; Paquin, J.-F. *J. Am. Chem. Soc.* **2007**, *129*, 1034–1035.
15. Nakamura, M.; Hajra, A.; Endo, K.; Nakamura, E. *Angew. Chem. Int. Ed.* **2005**, *44*, 7248–7251.

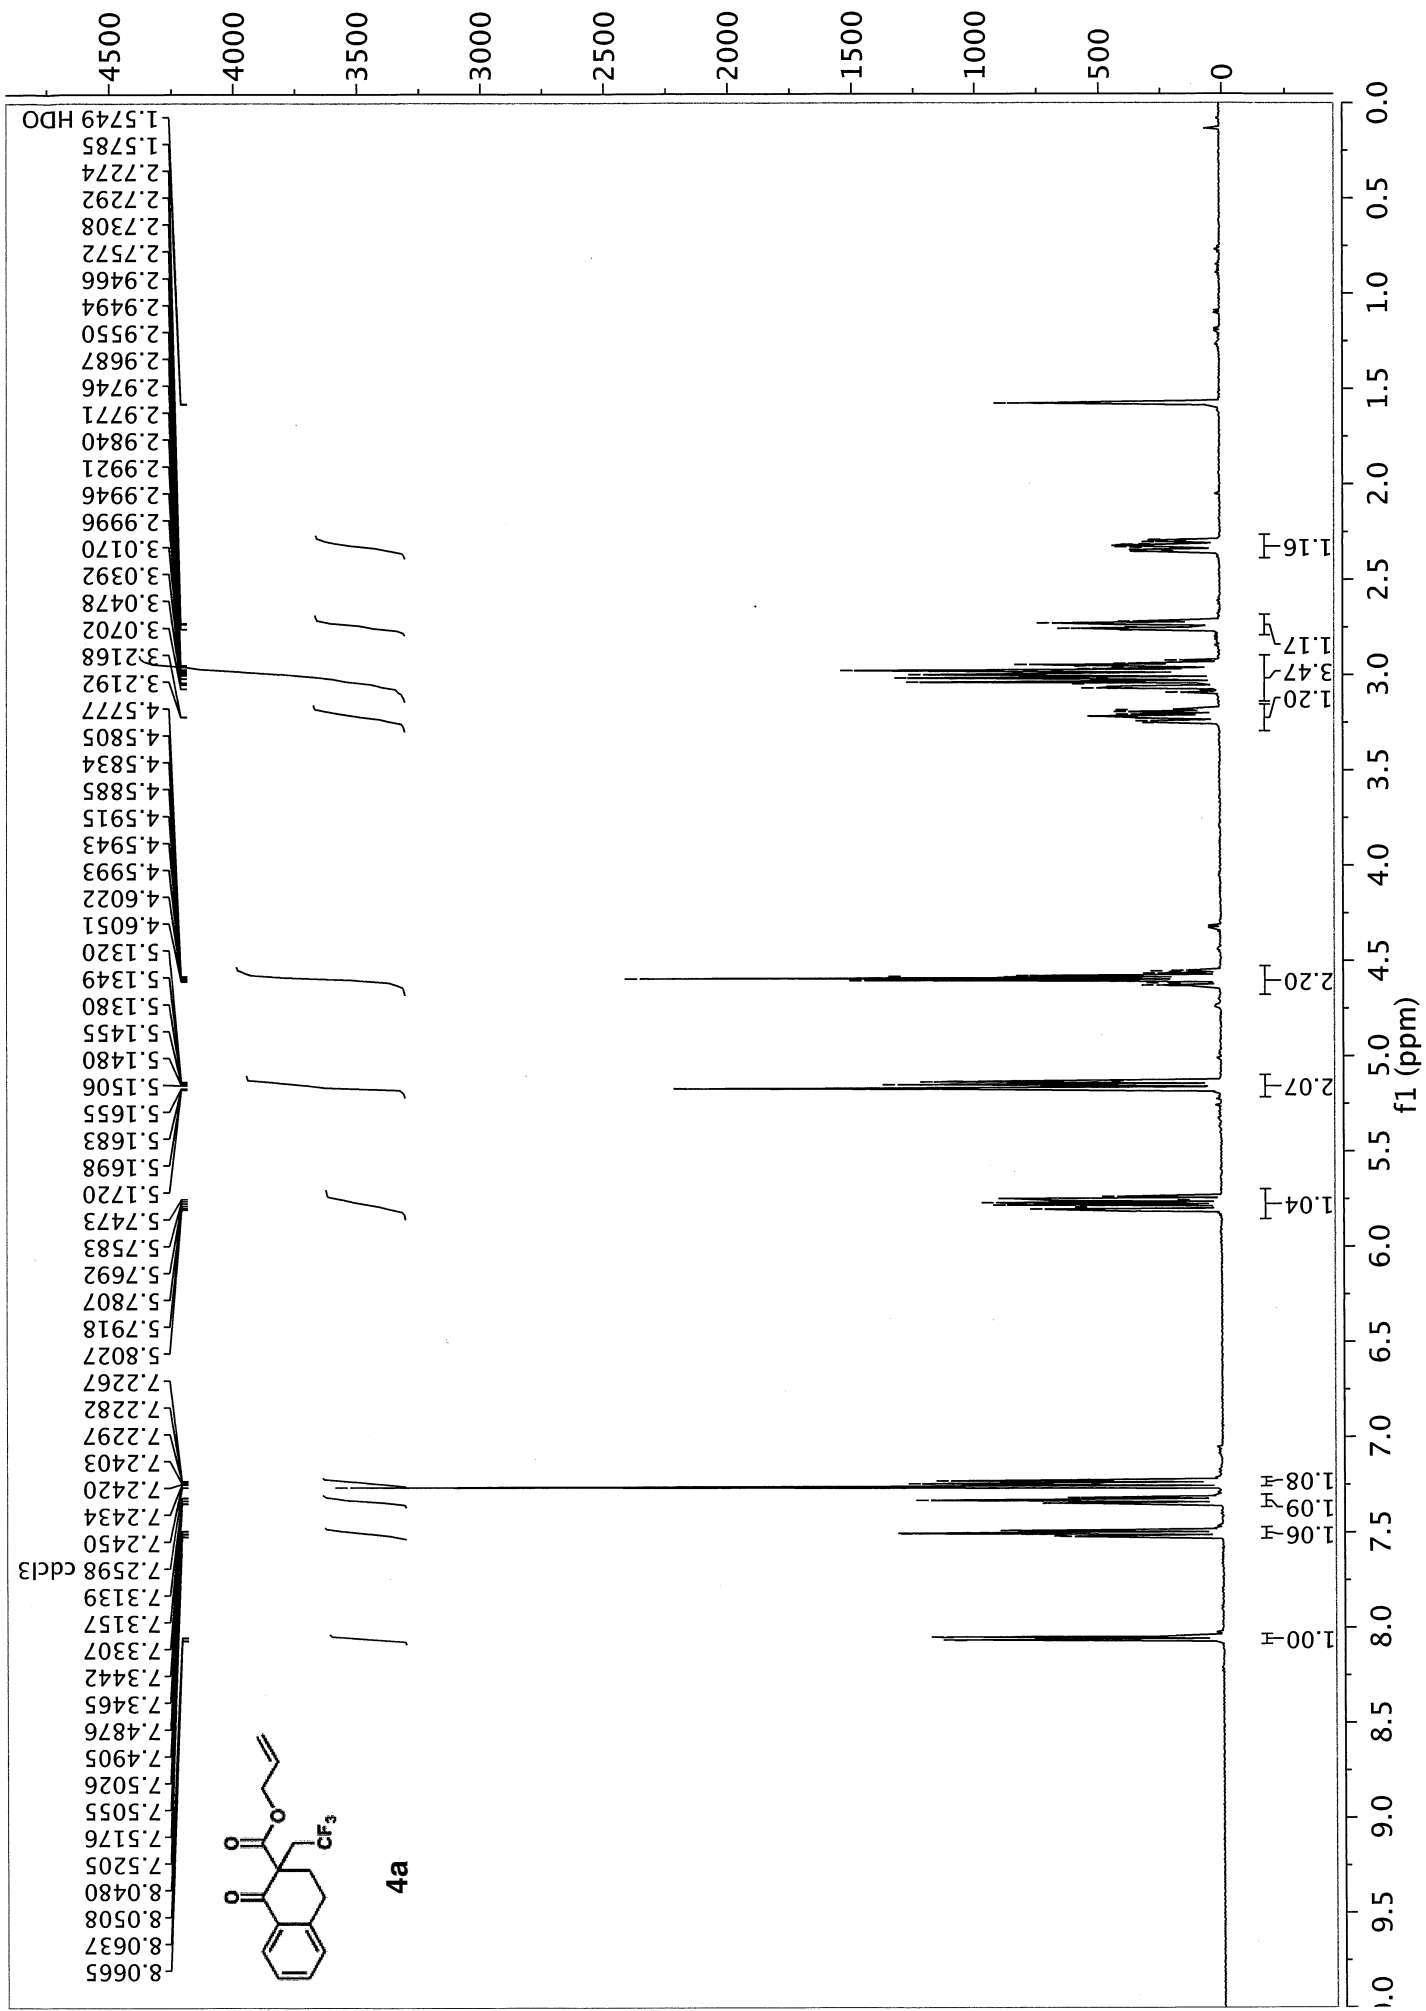

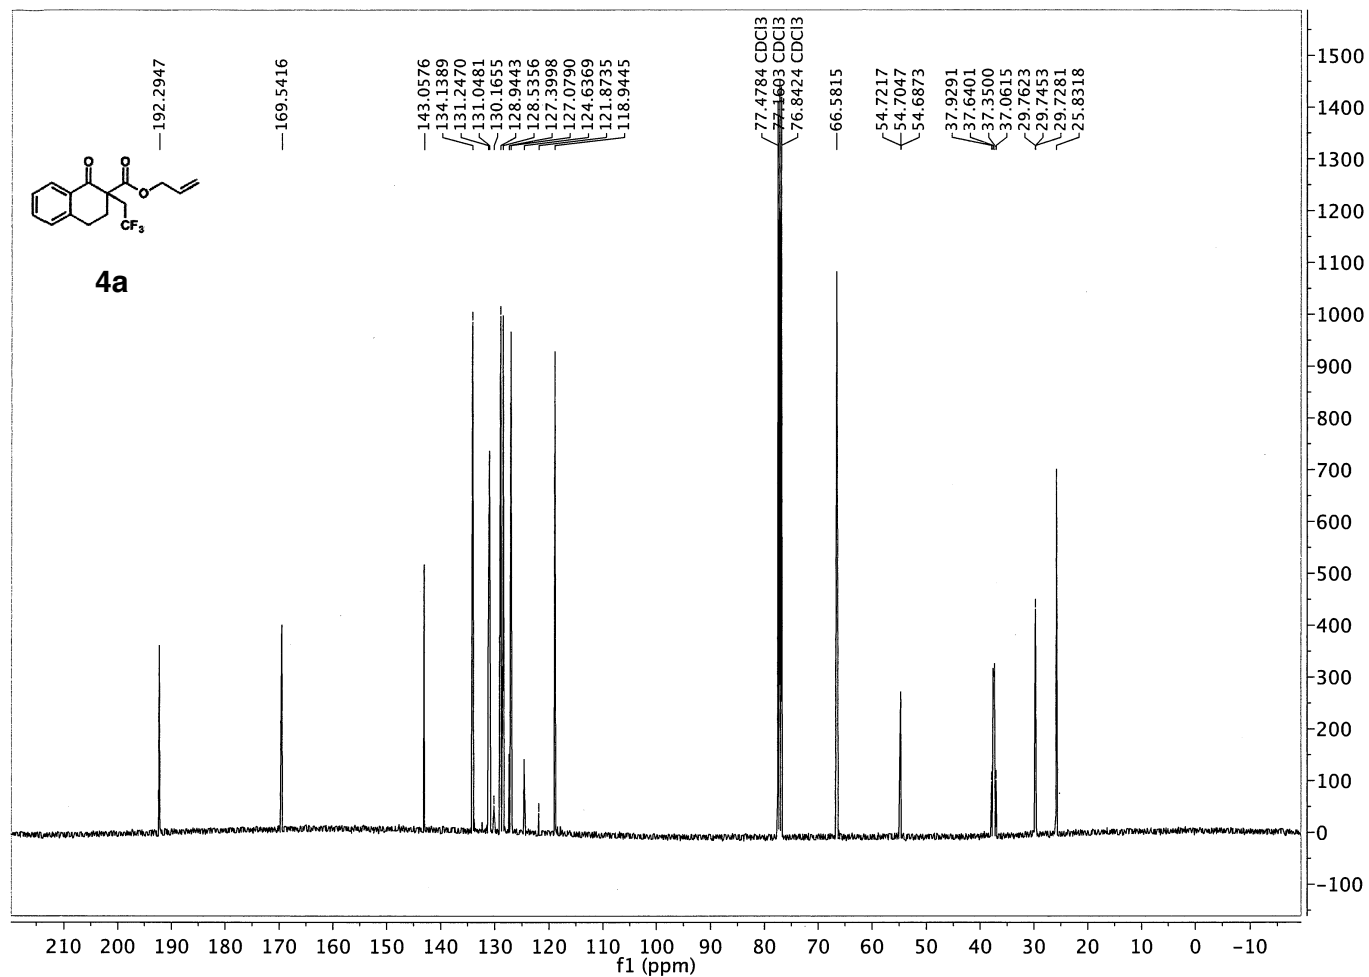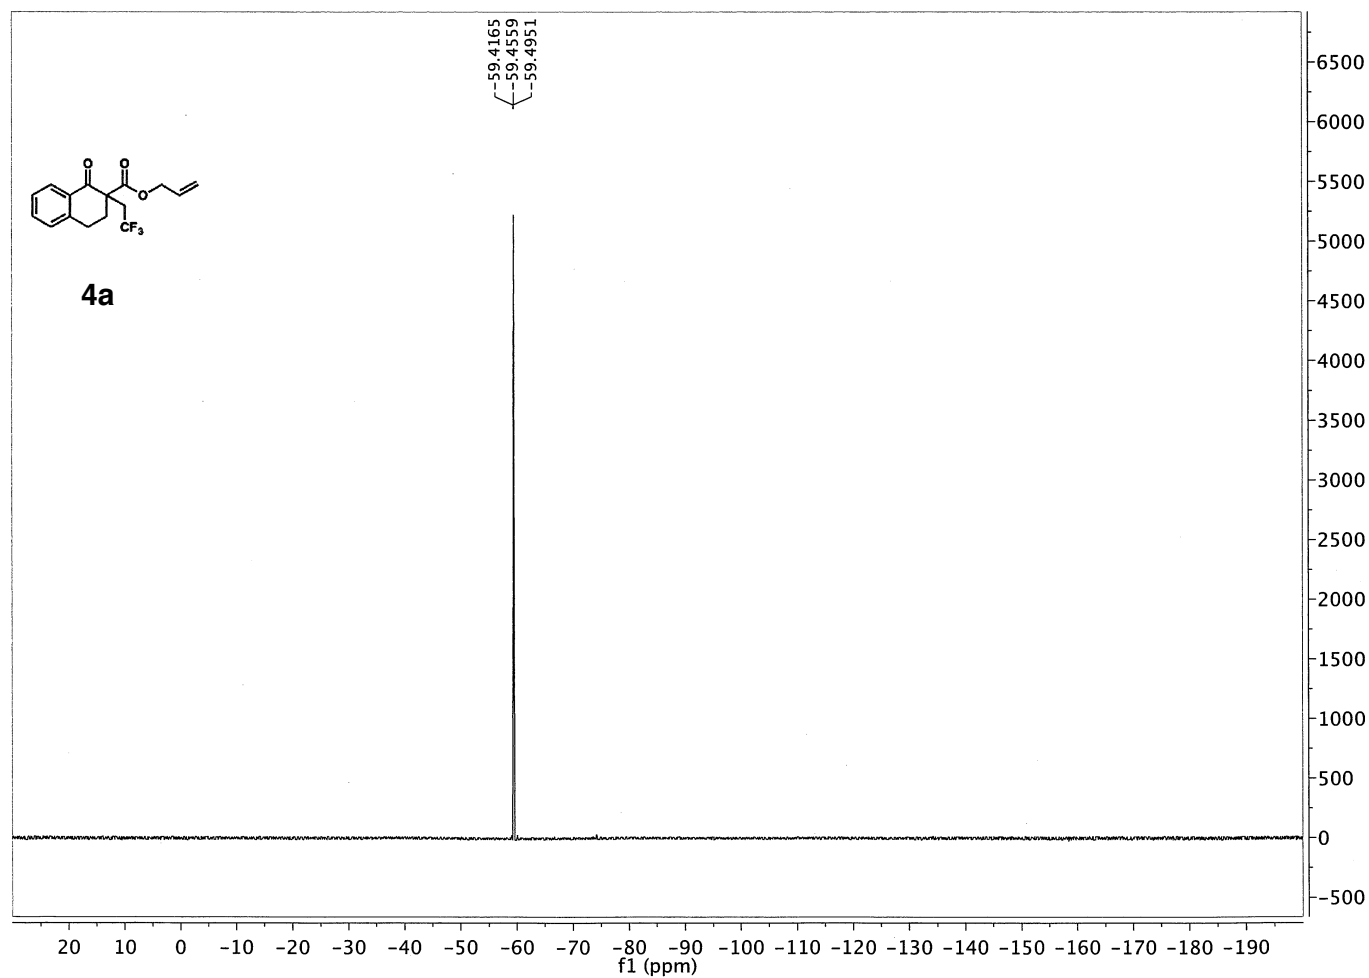

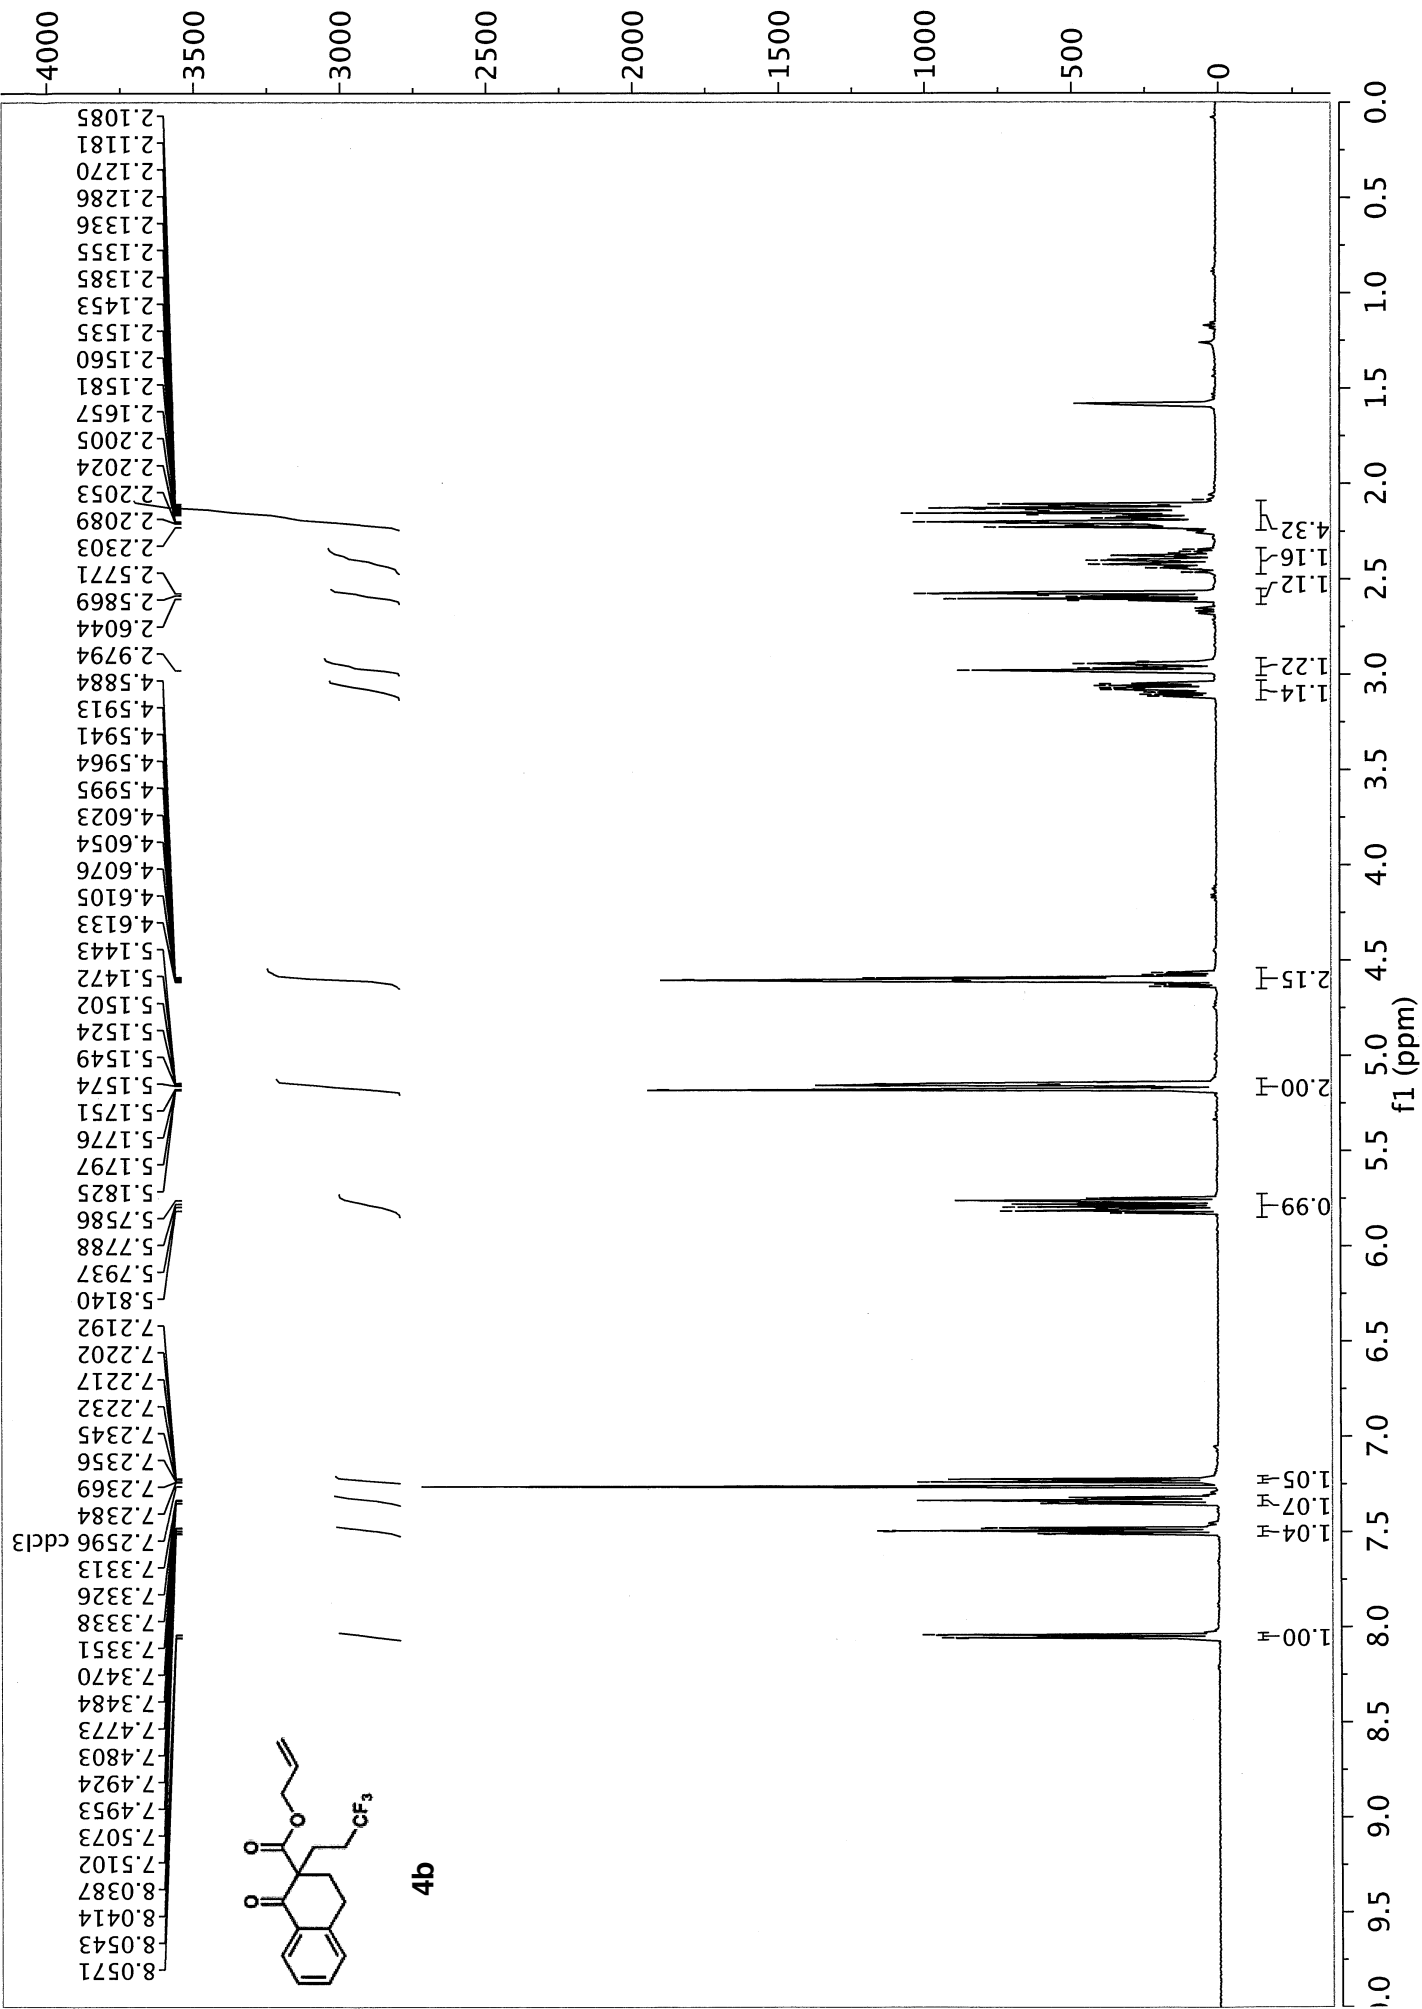

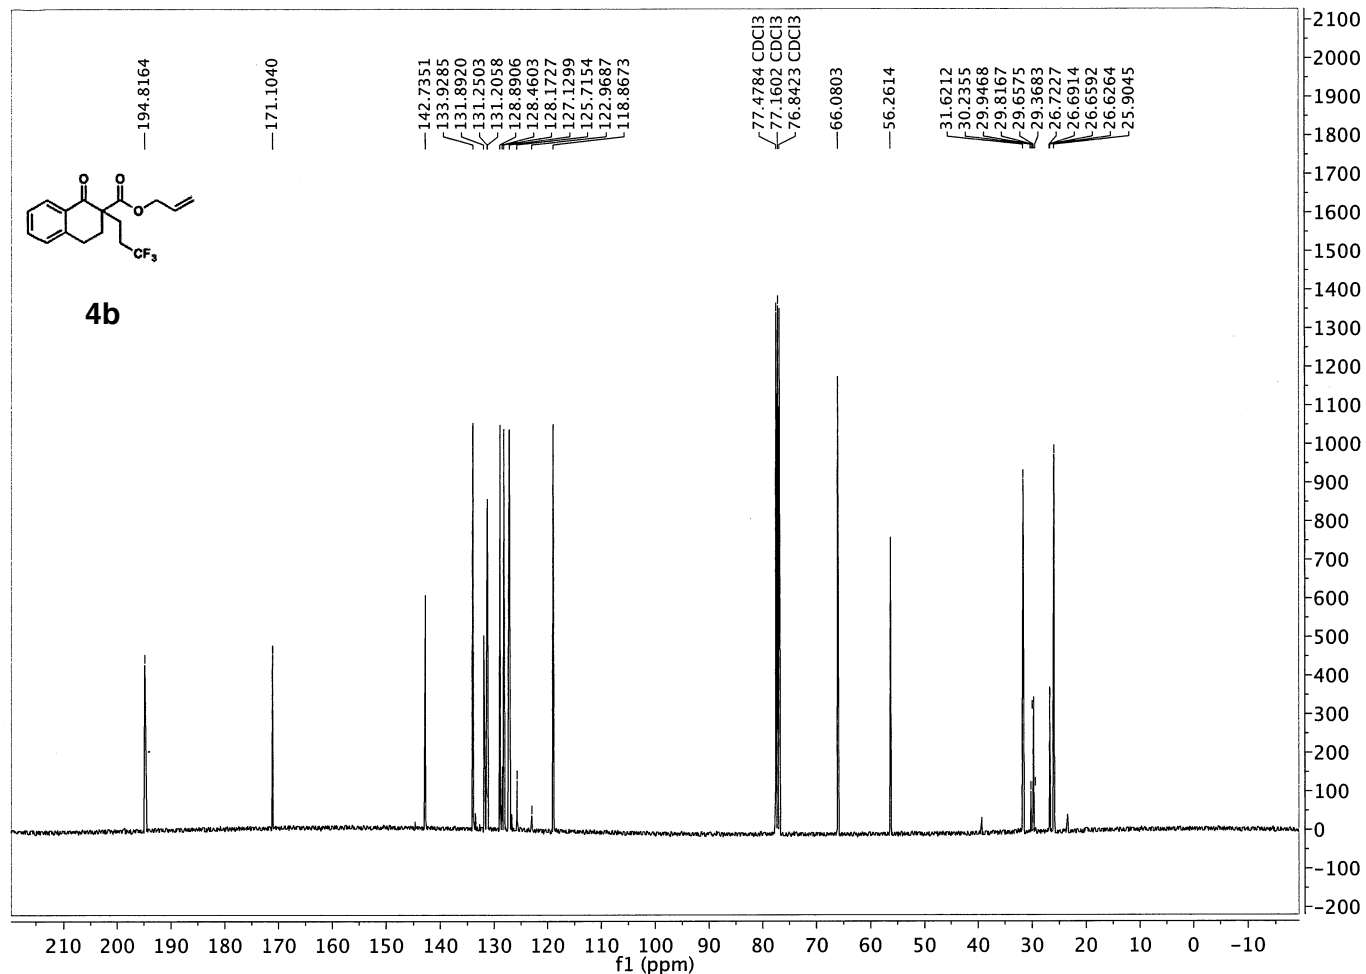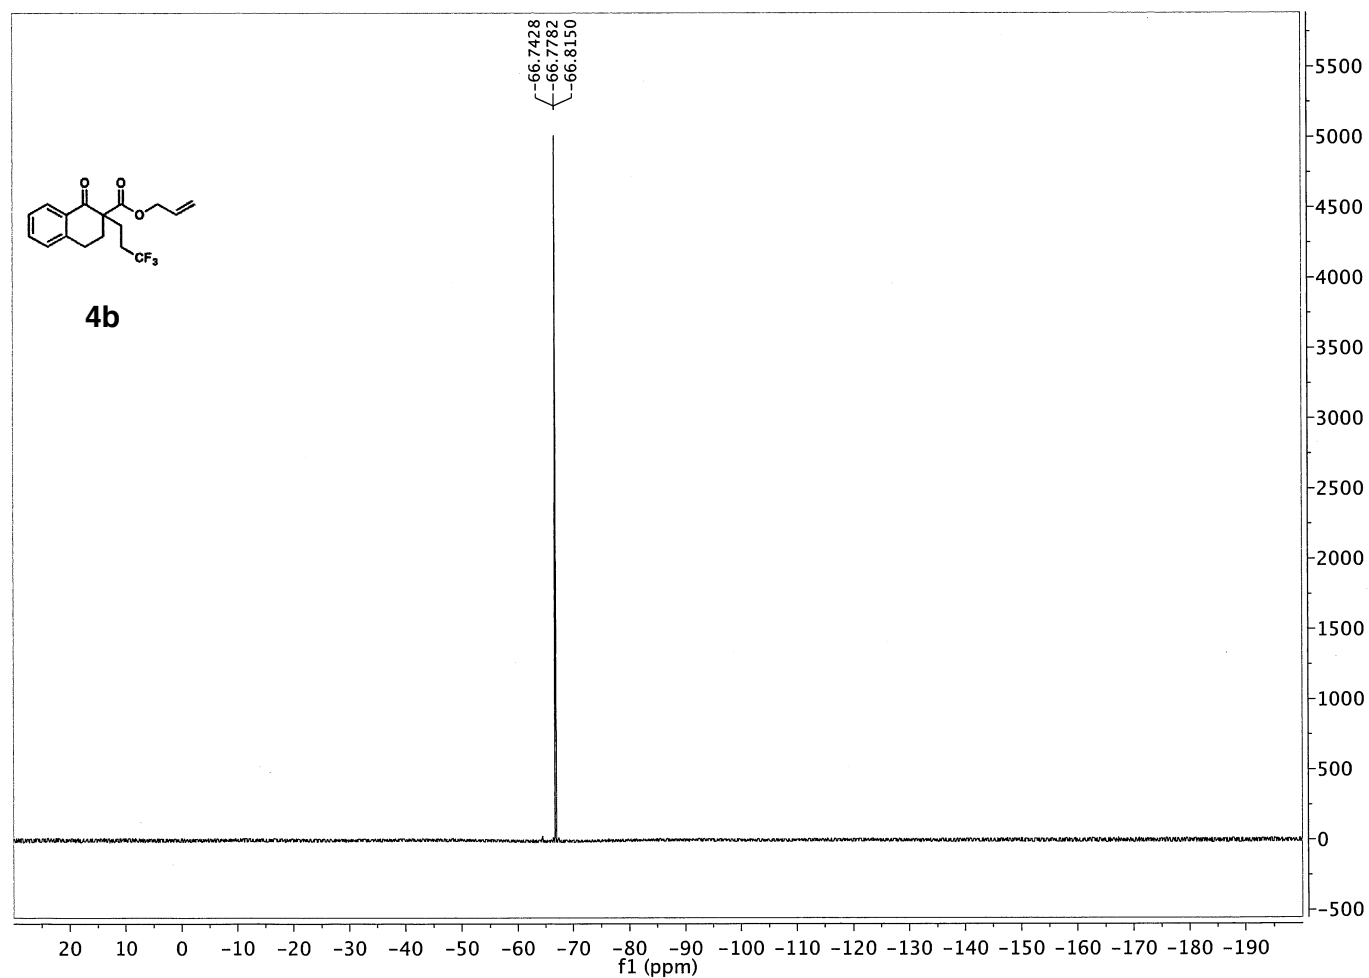

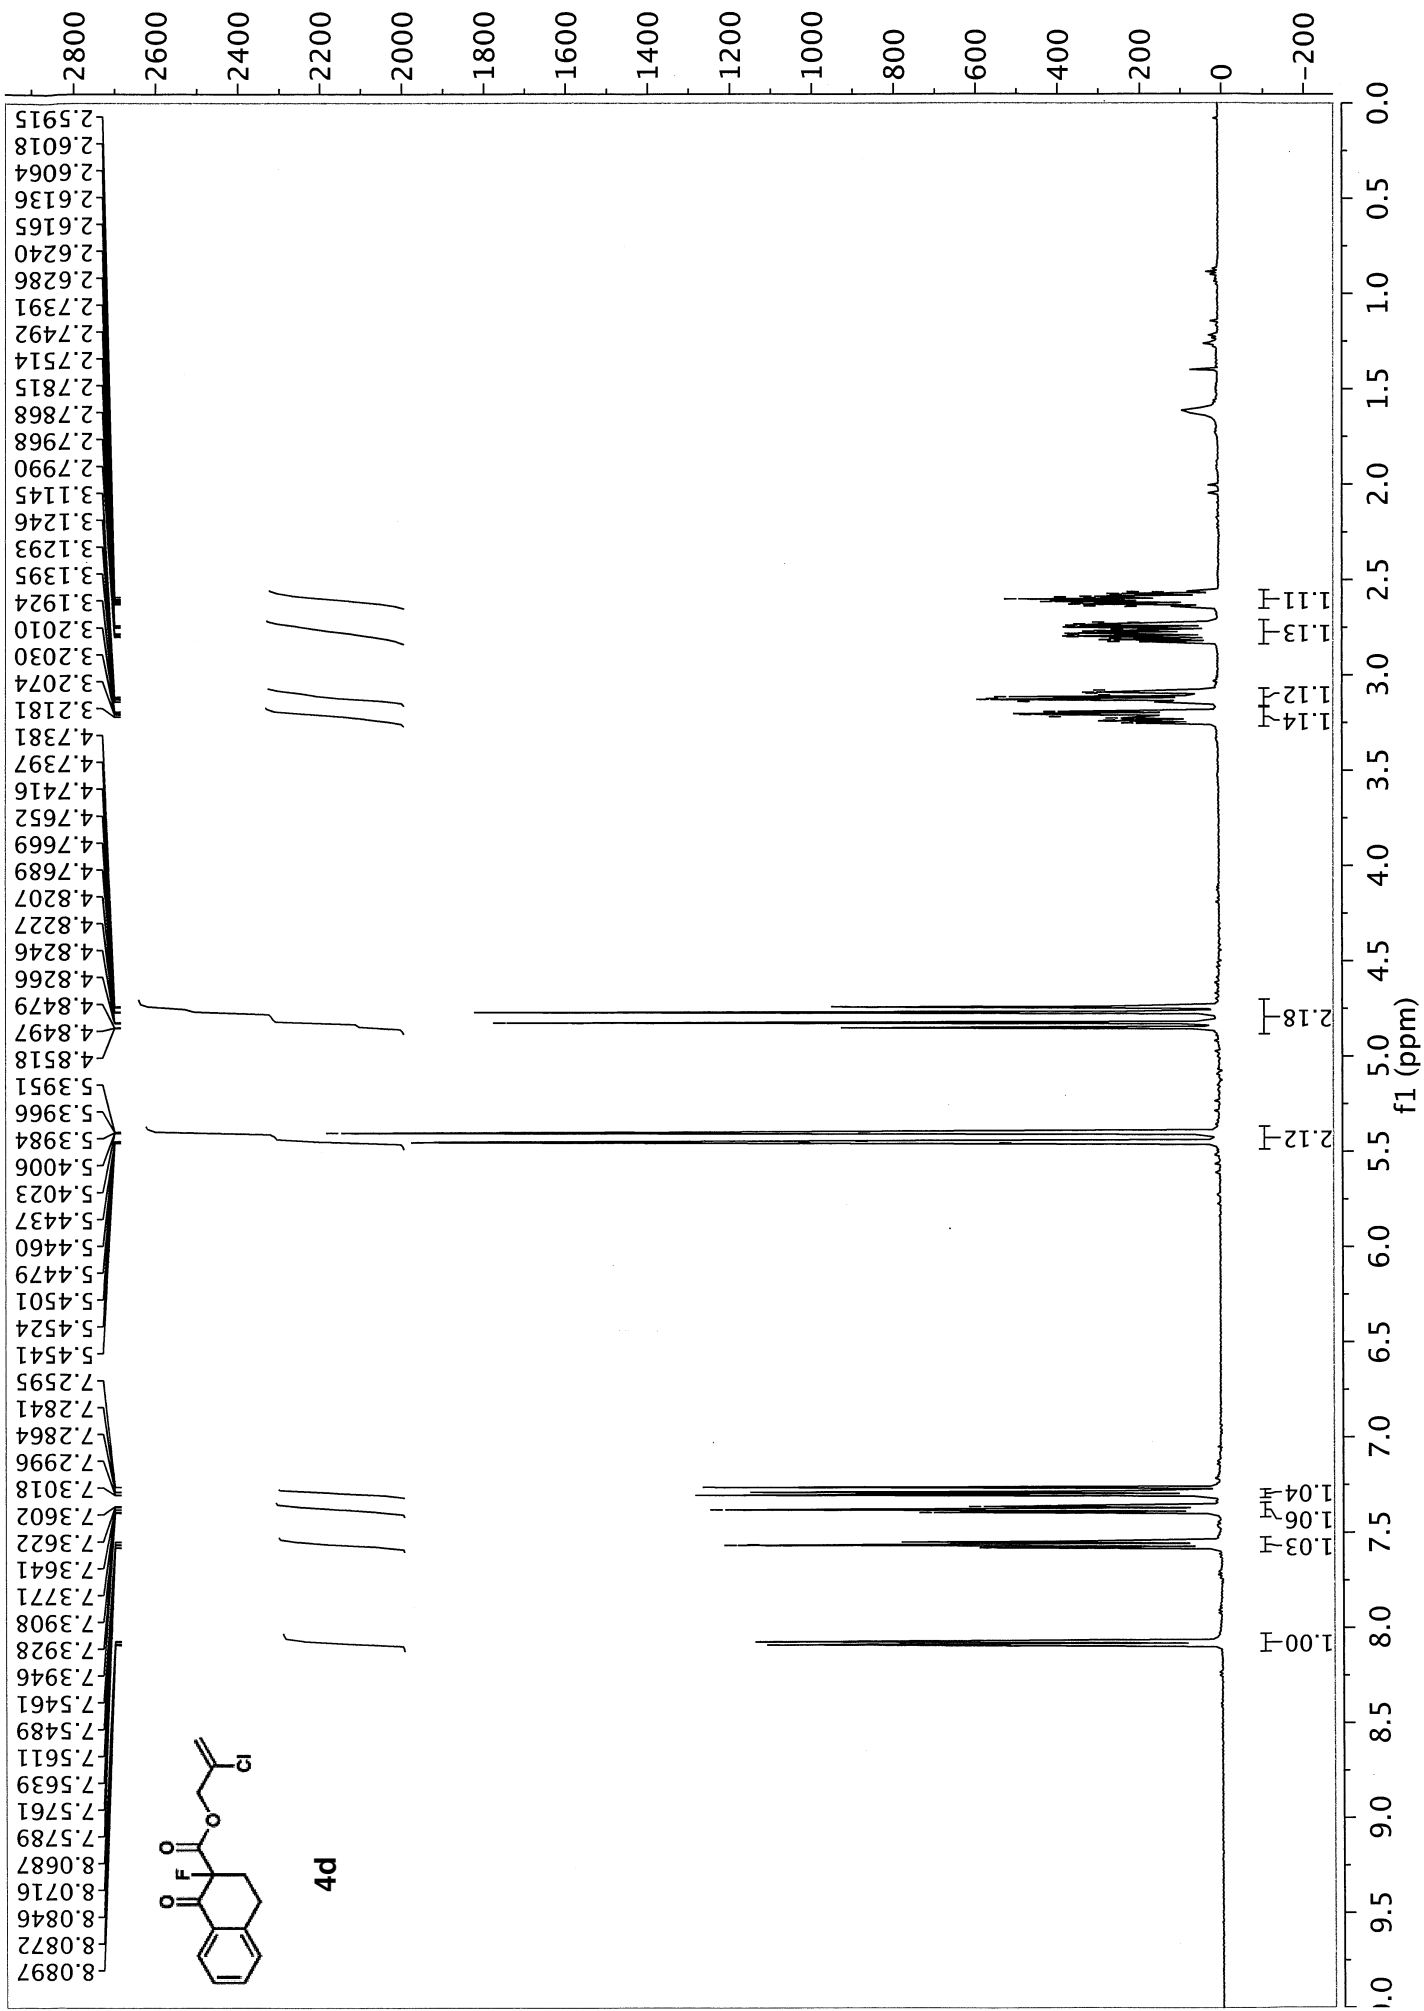

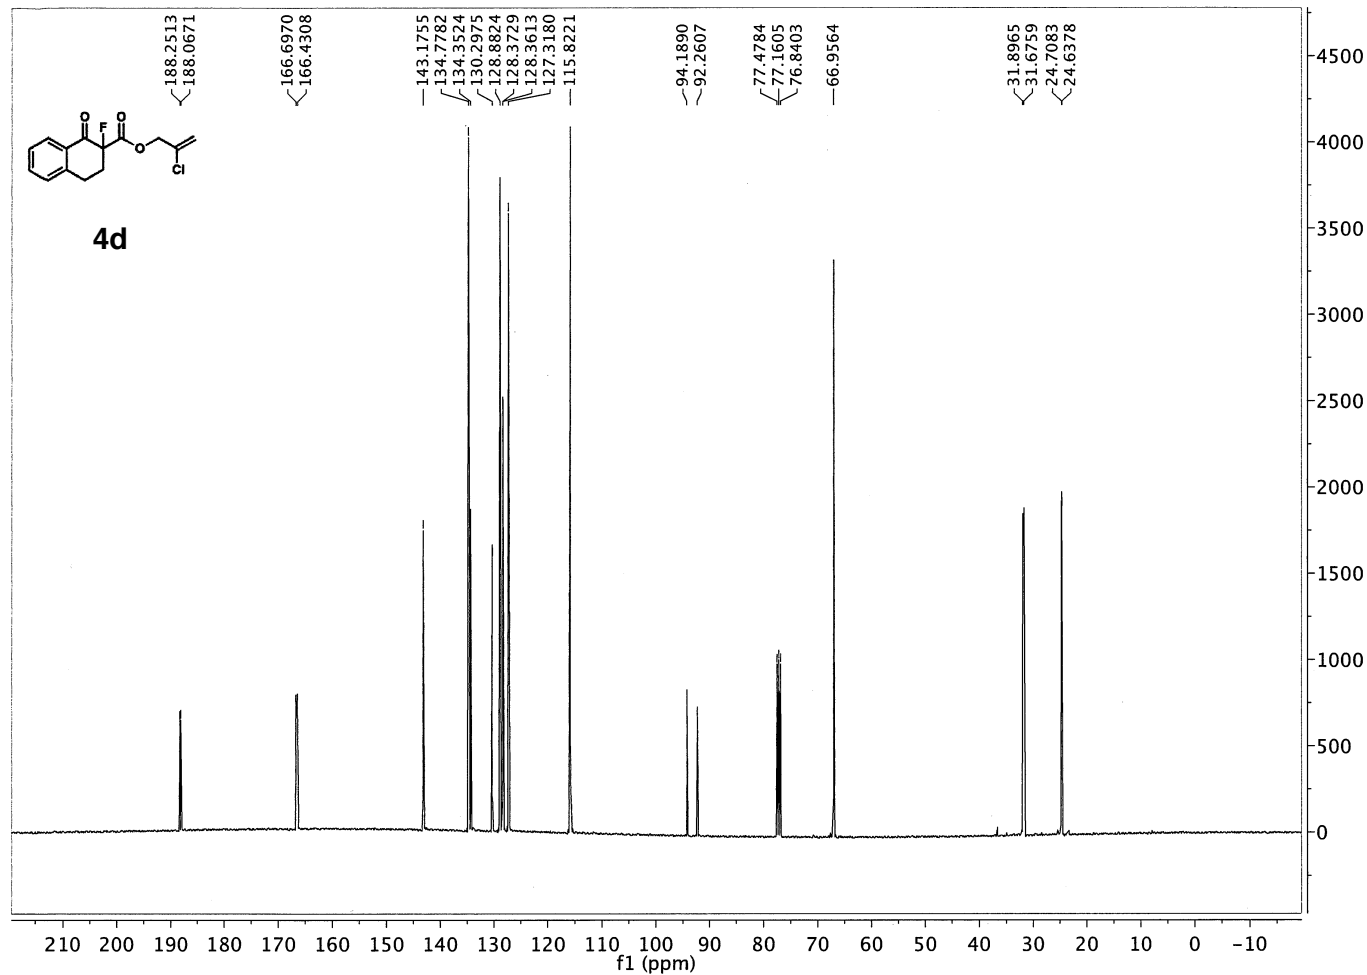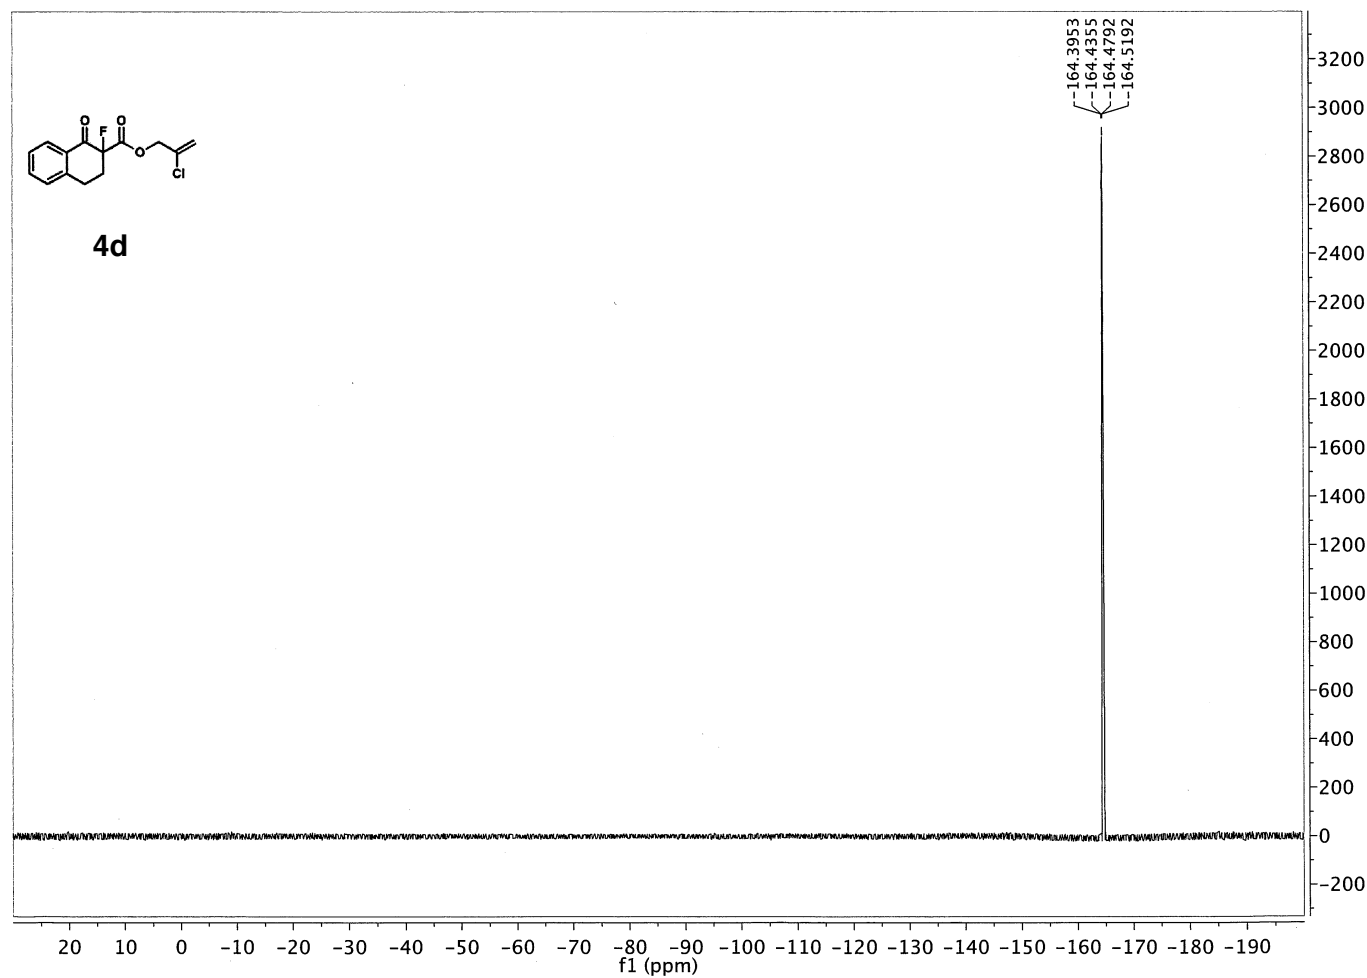

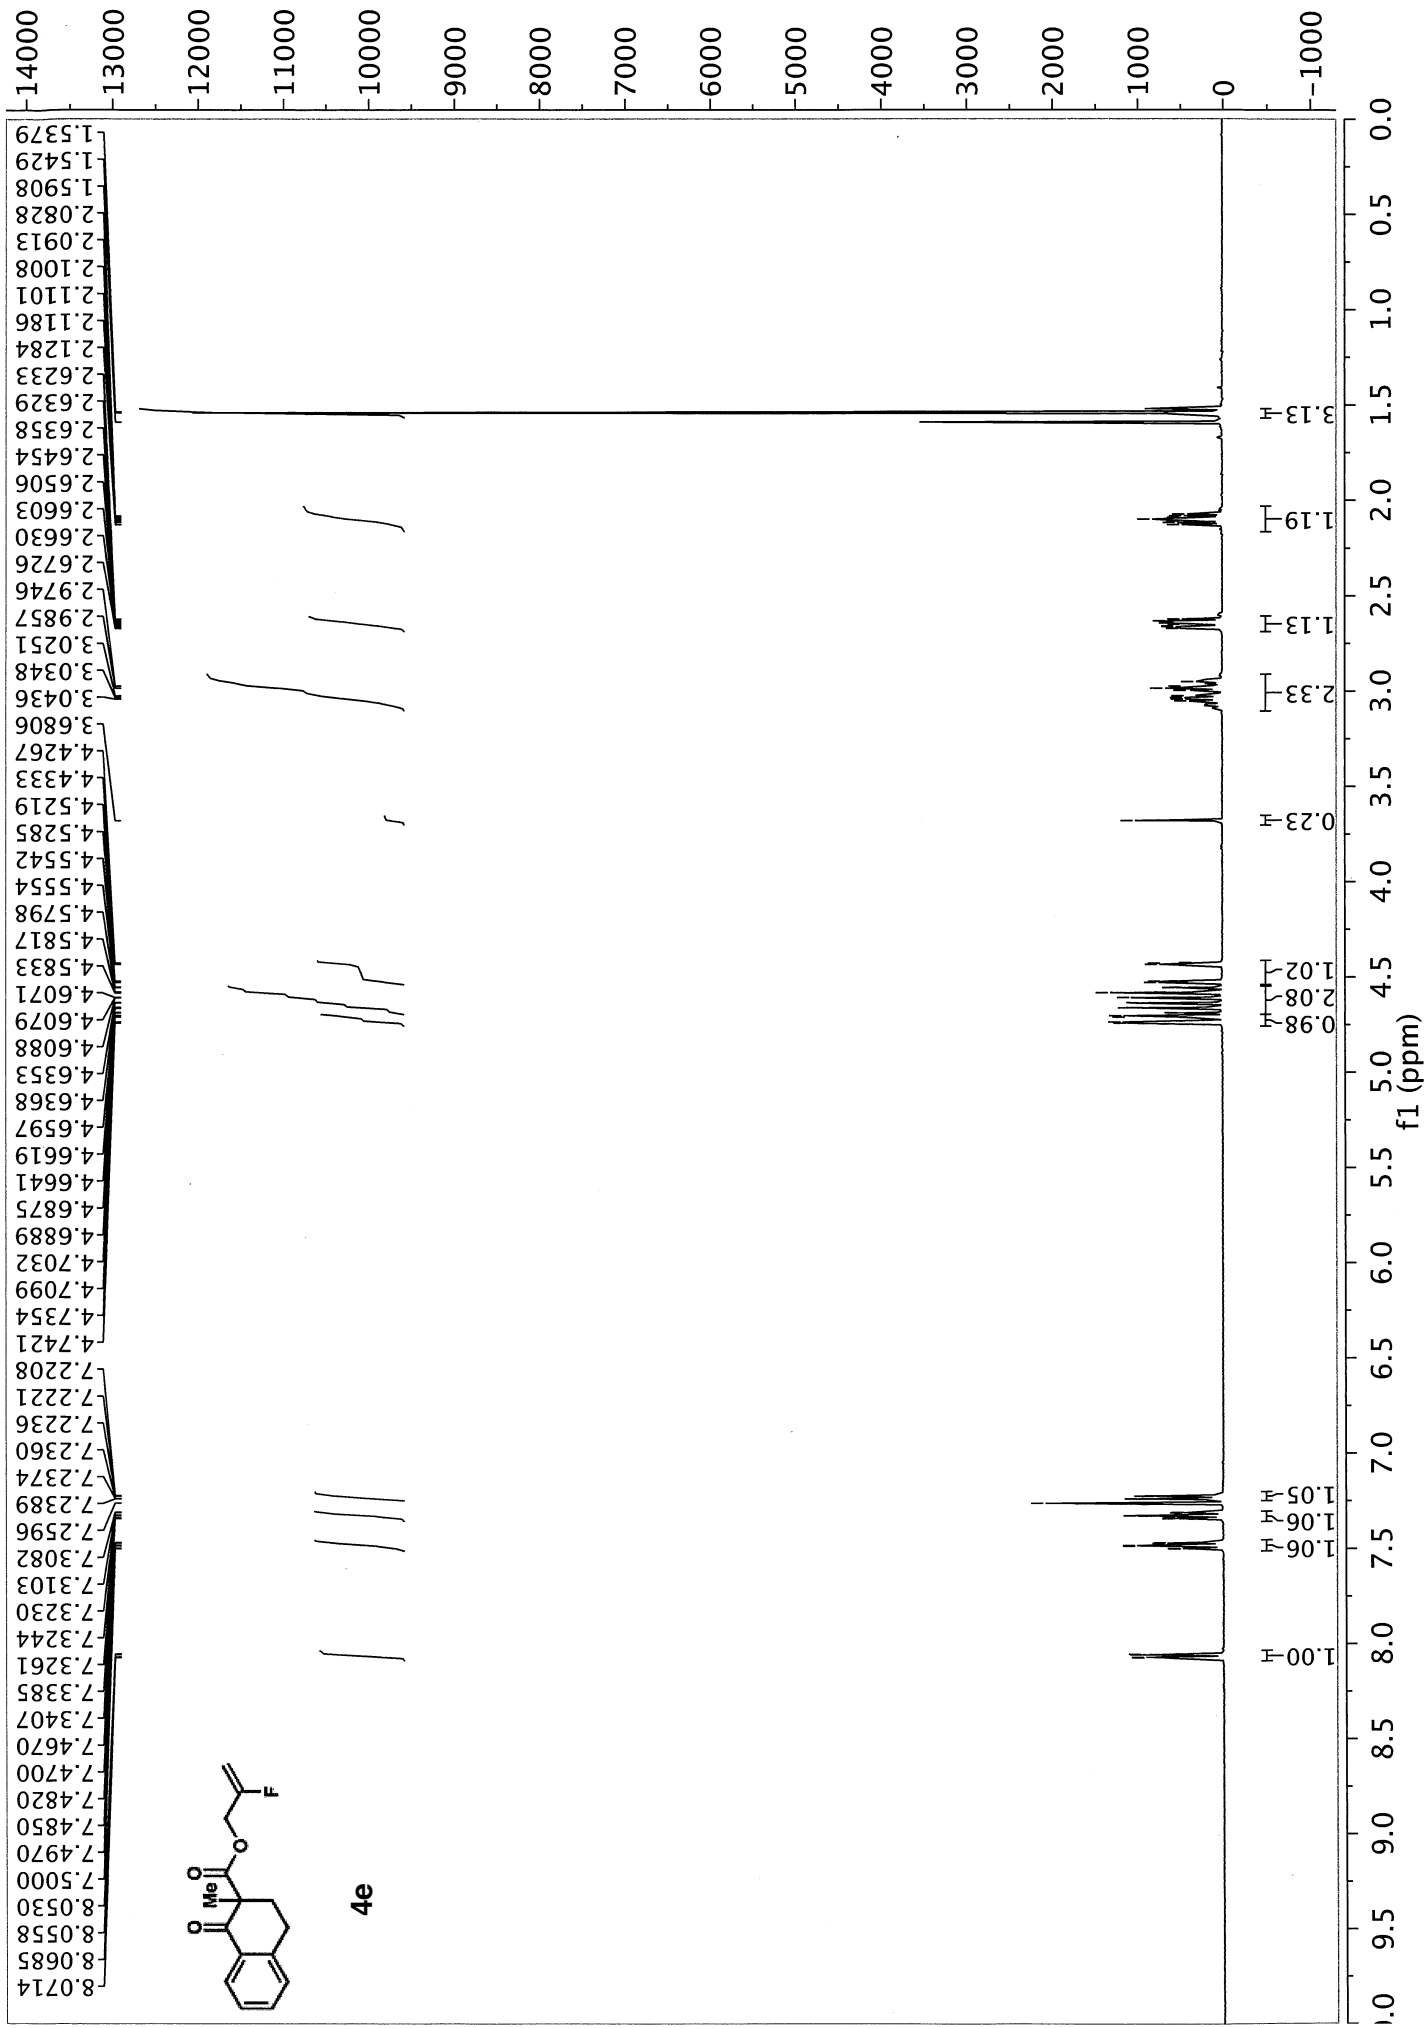

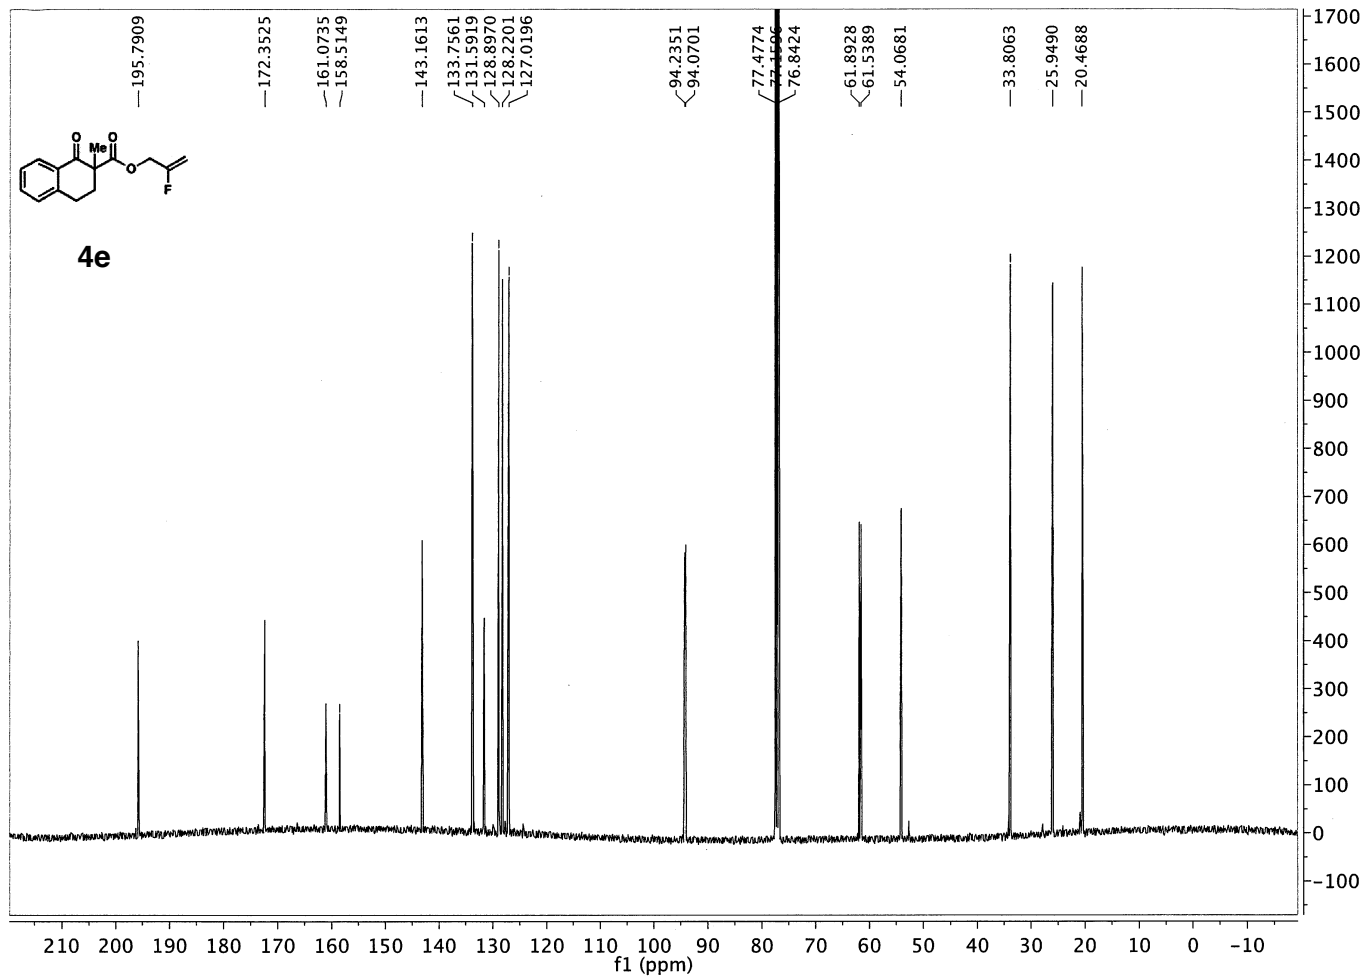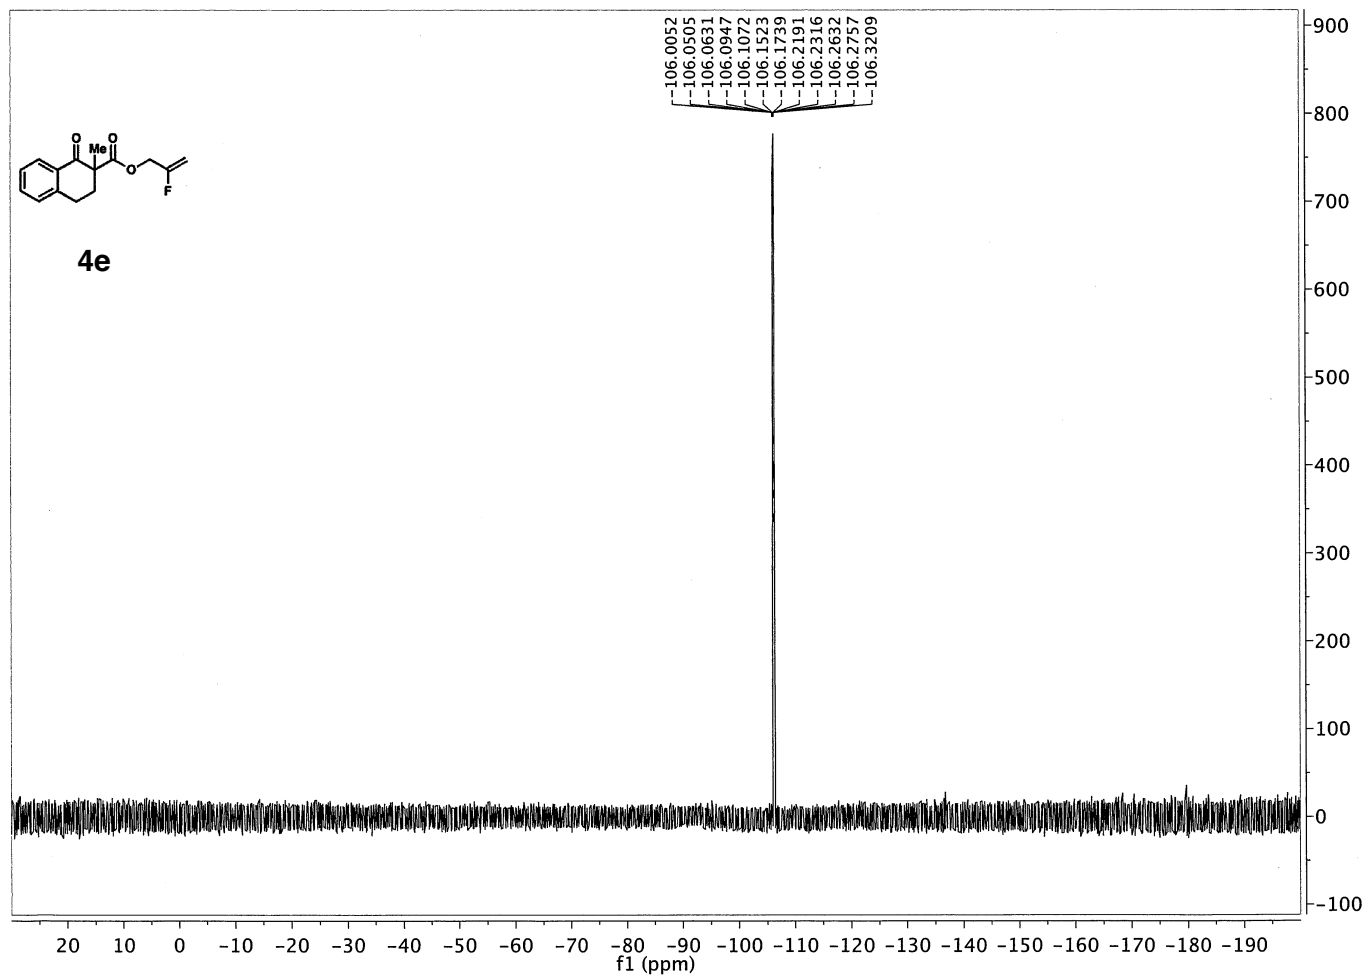

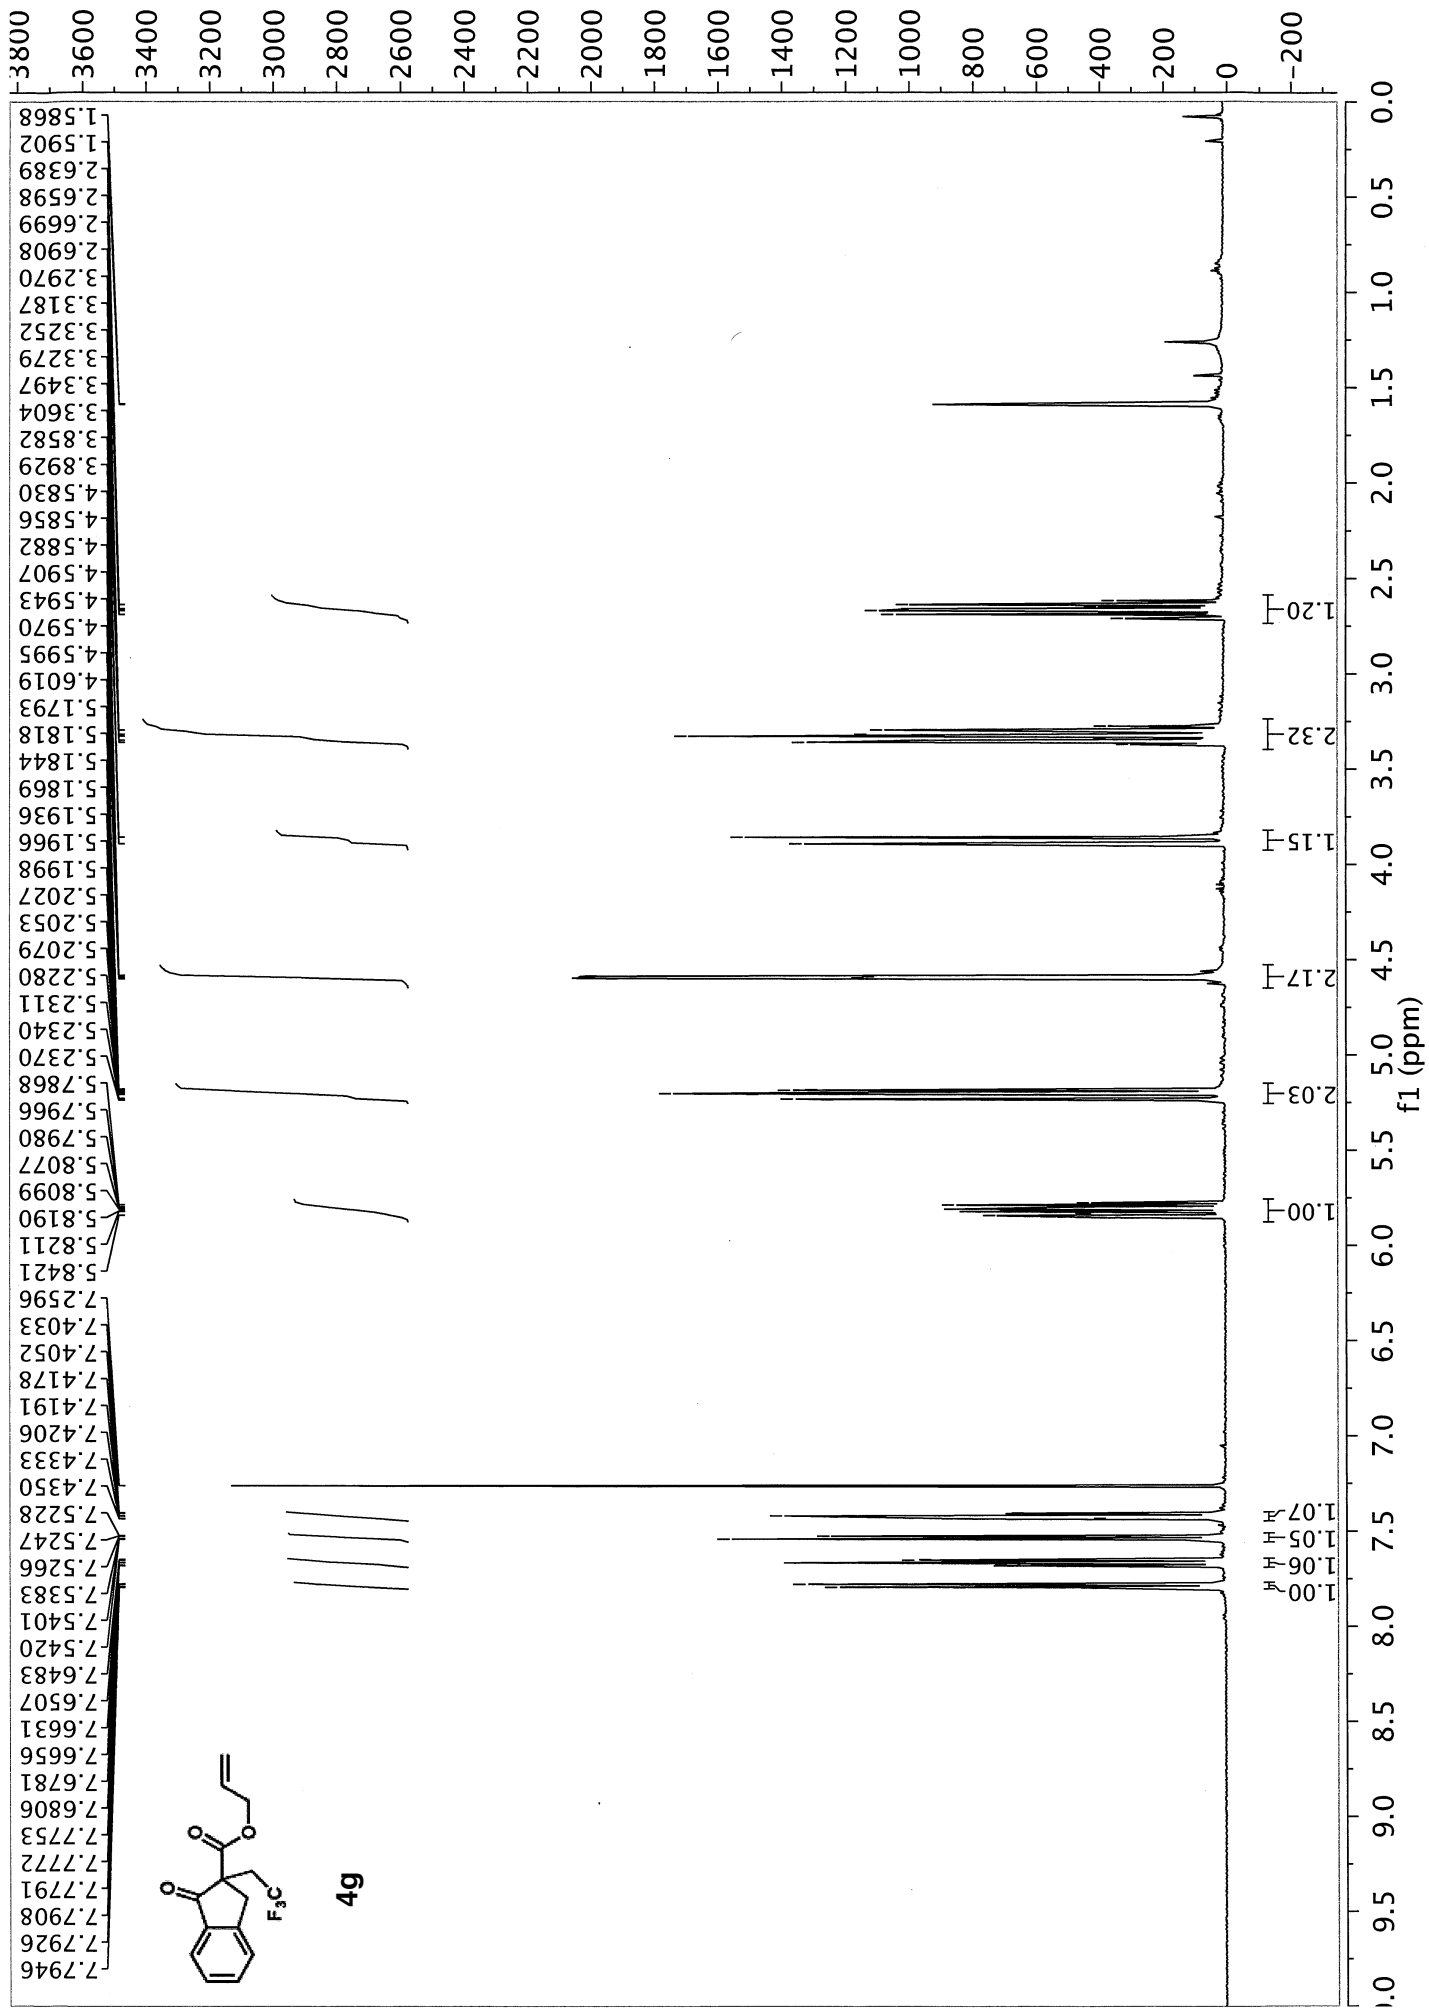

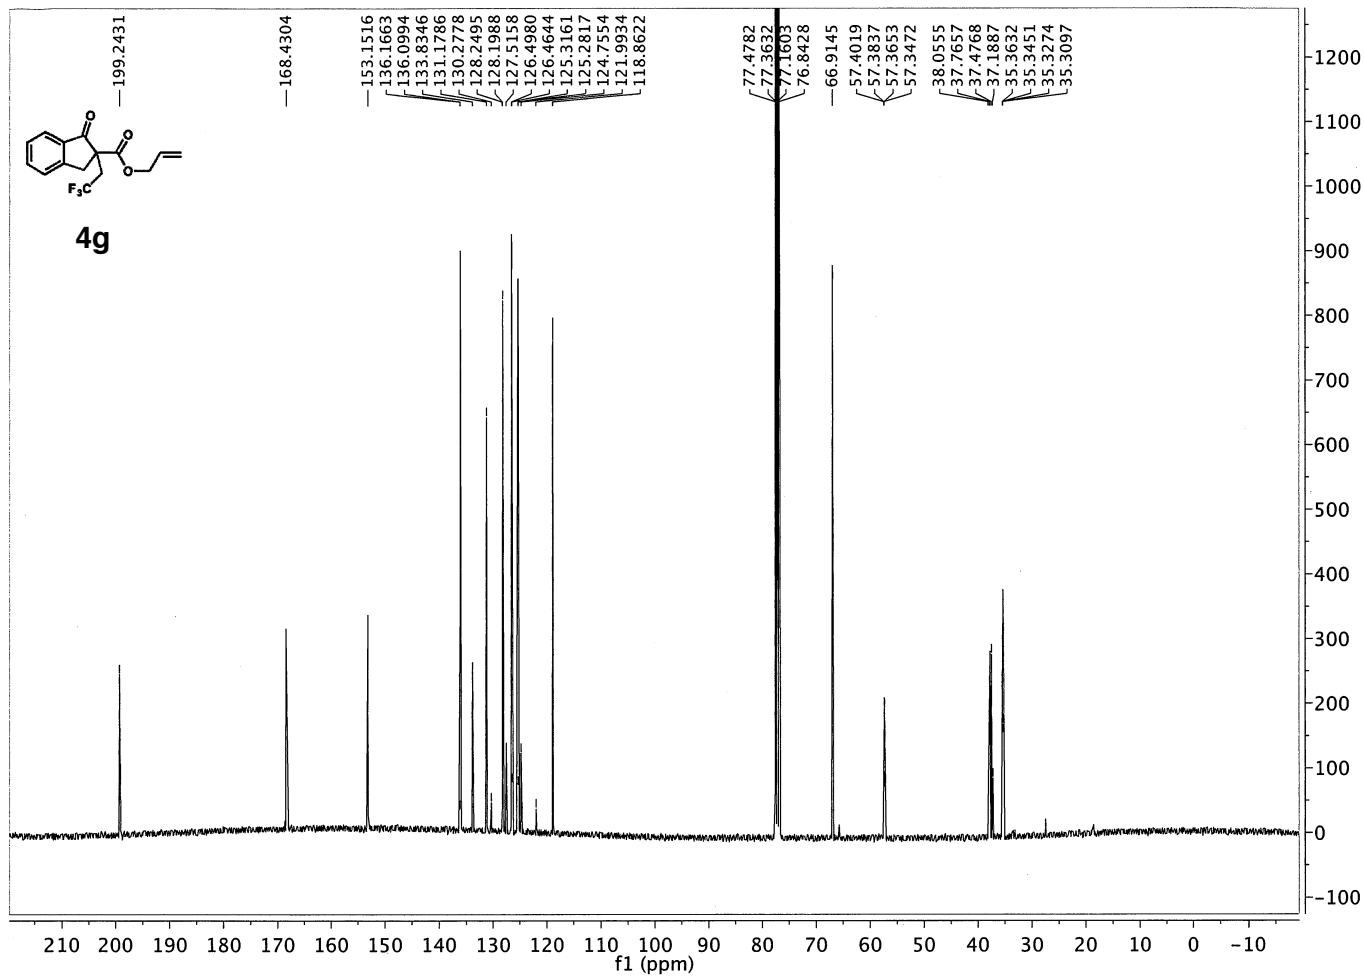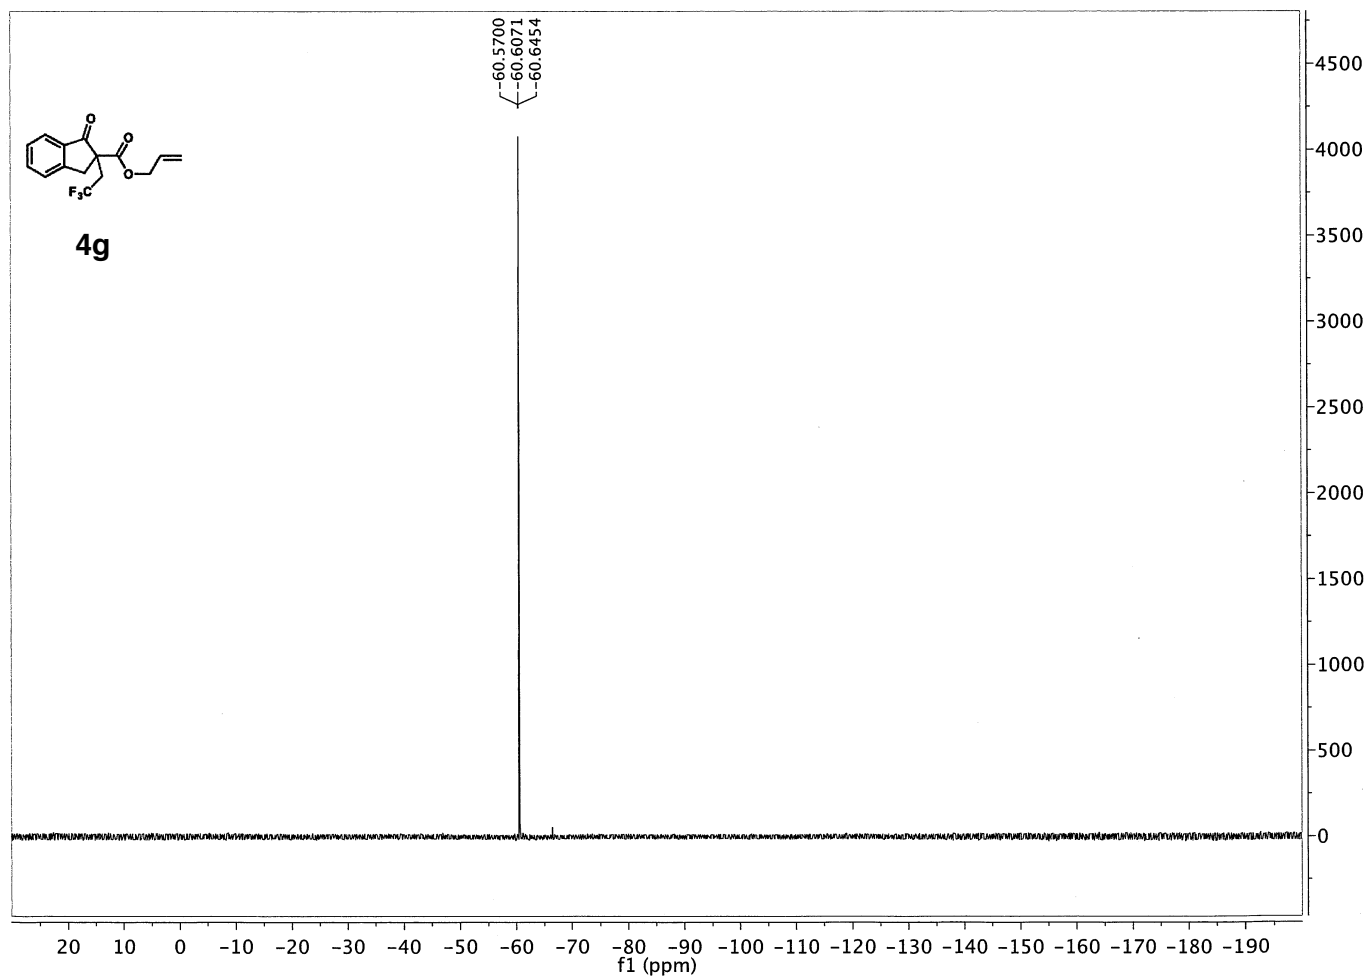

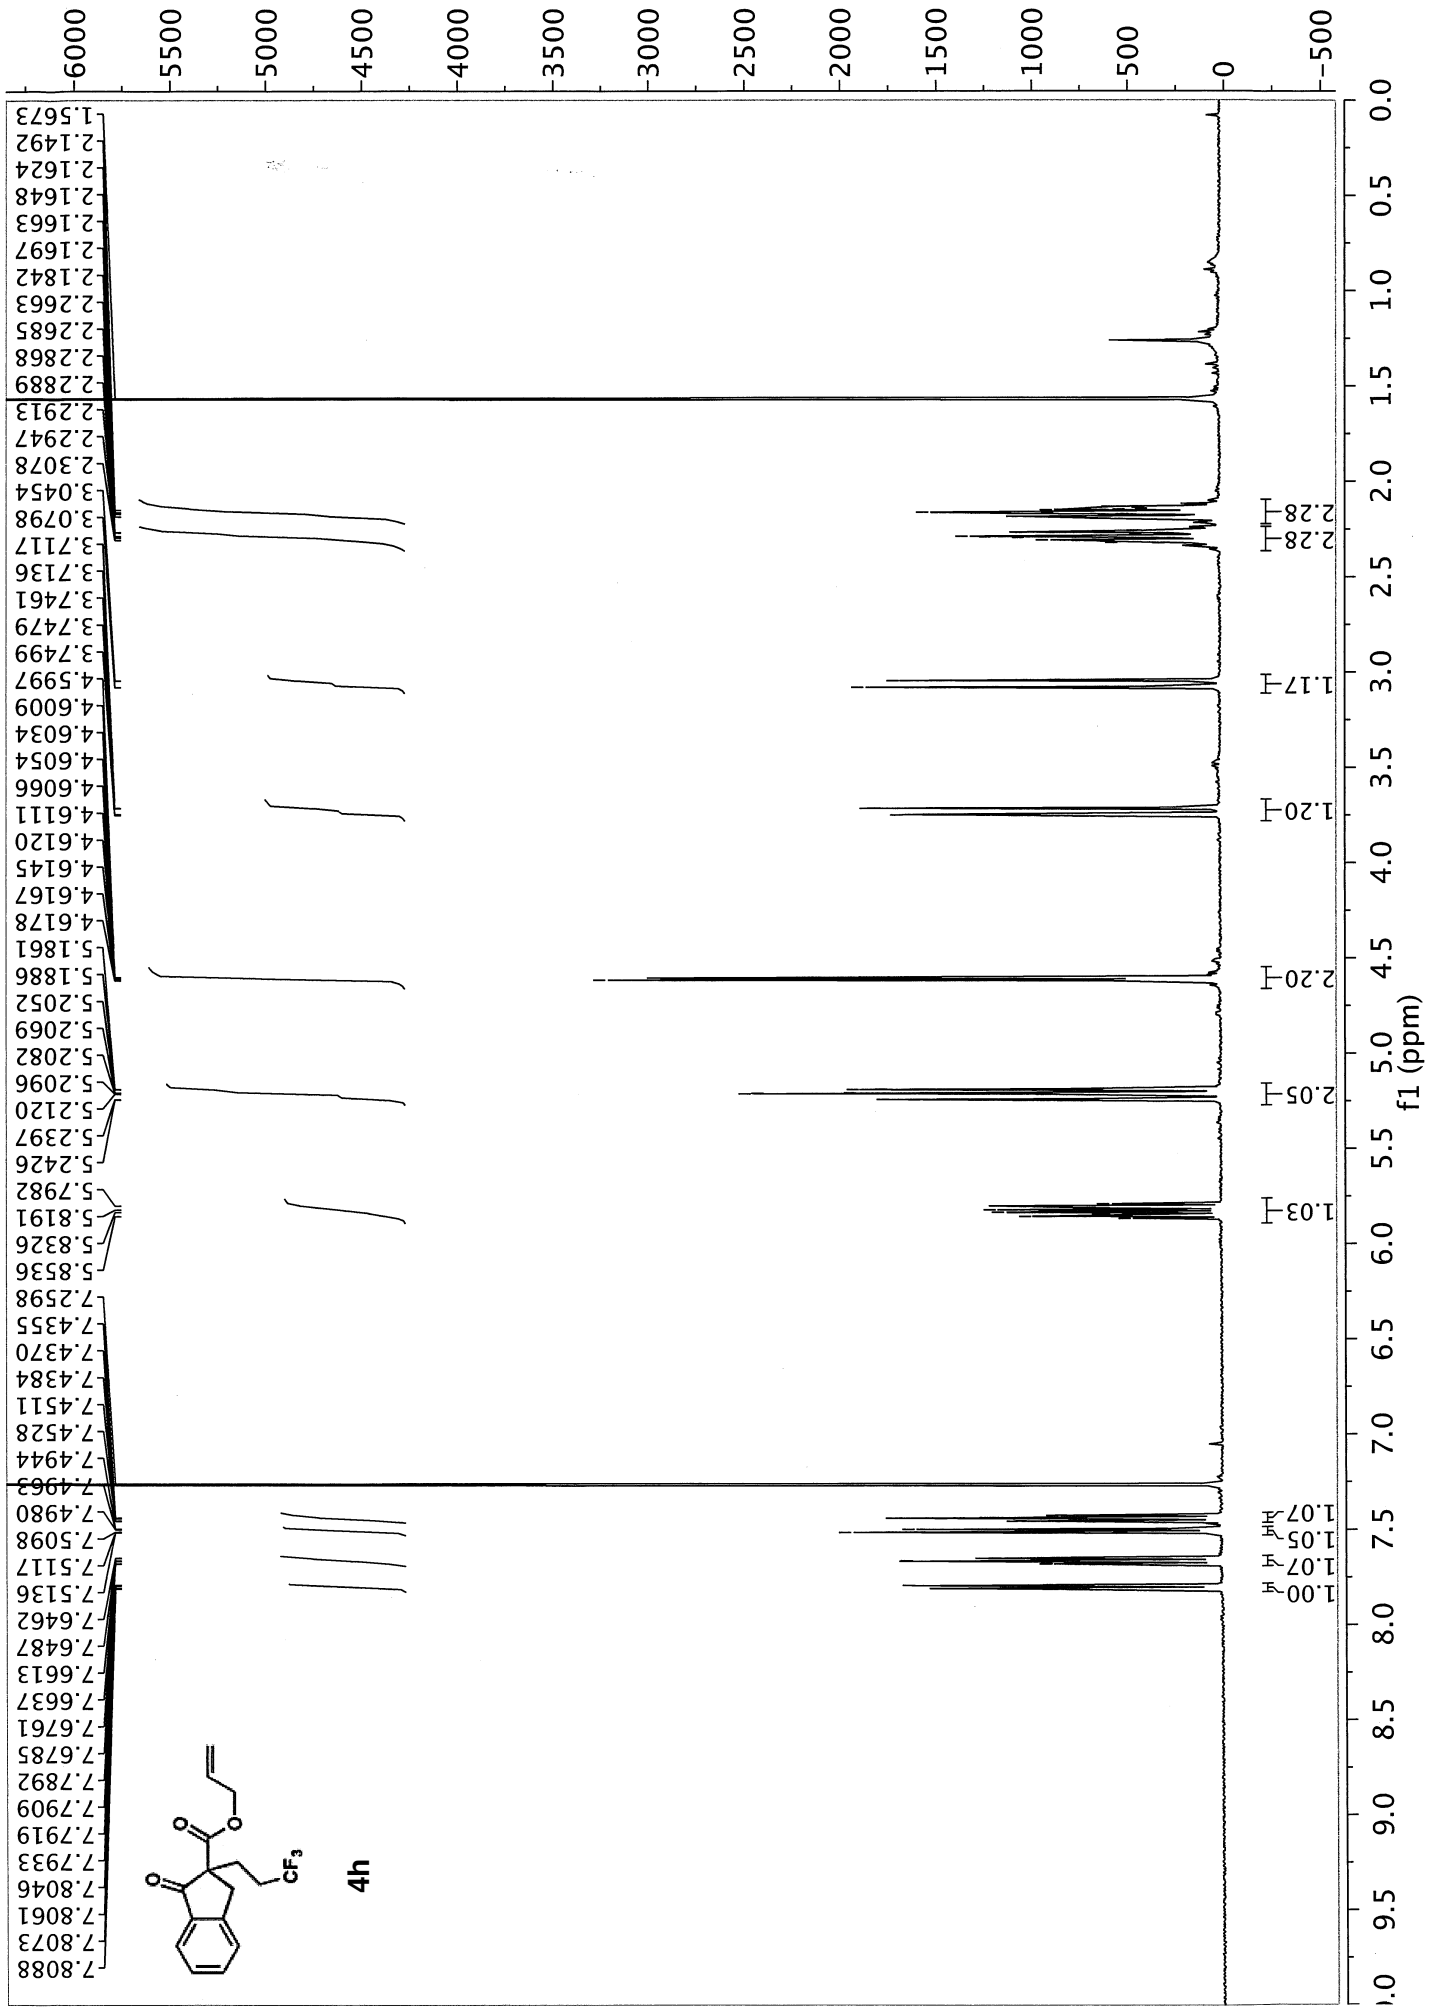

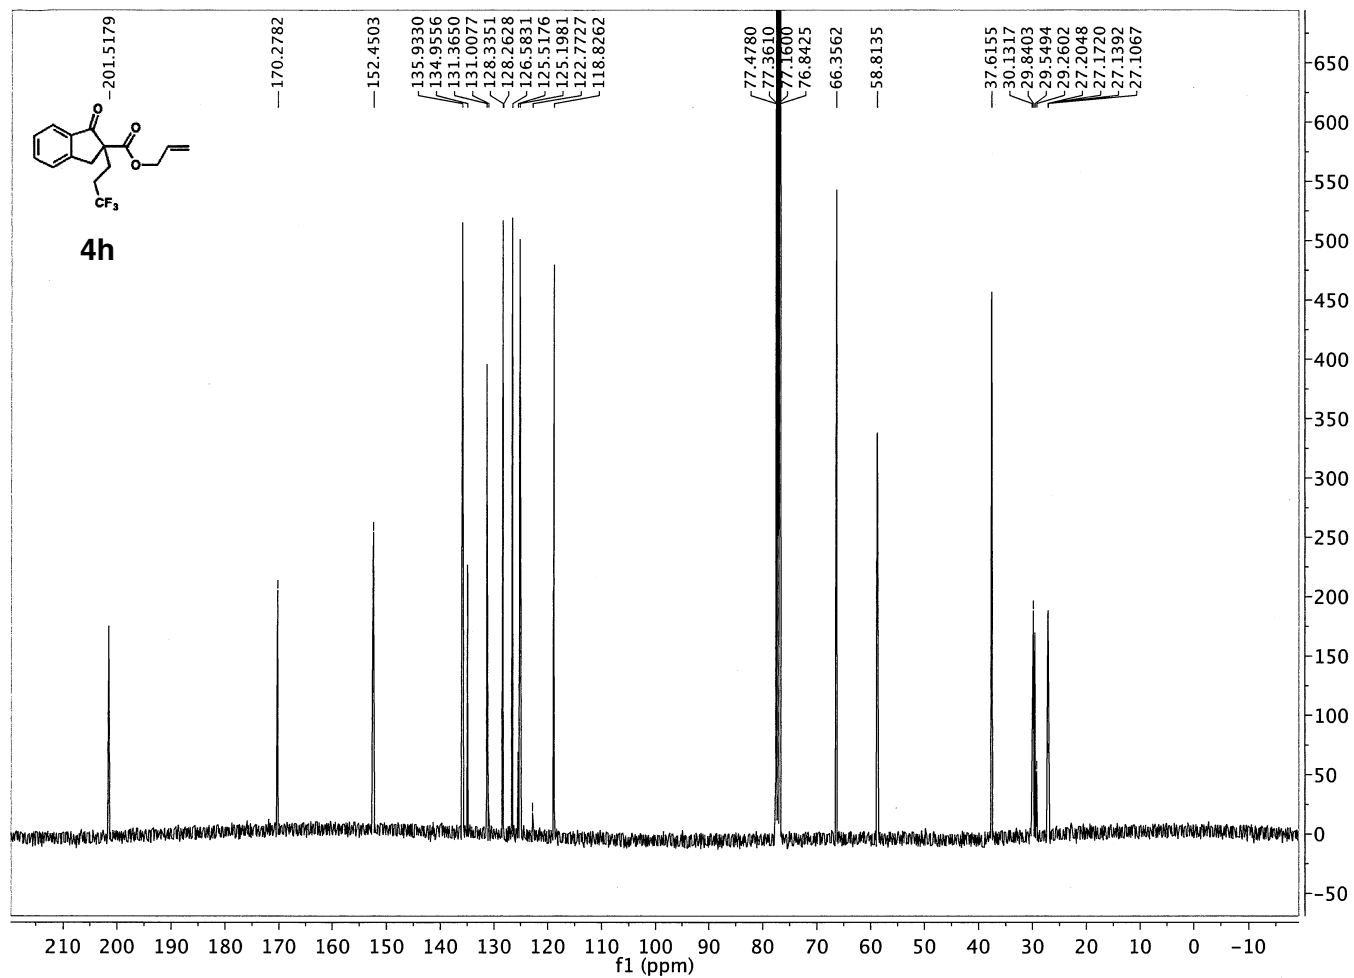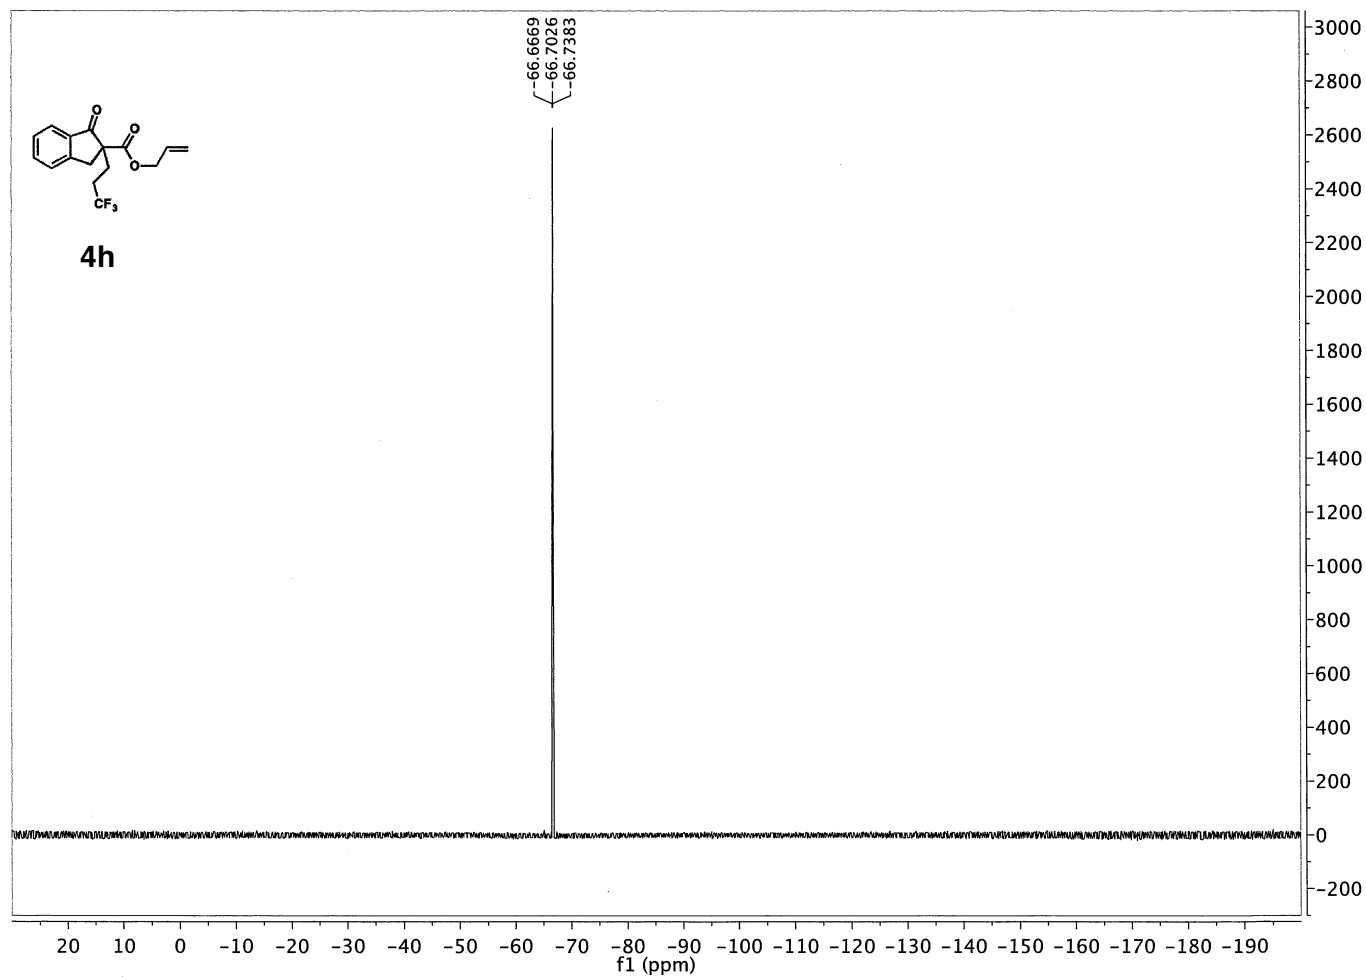

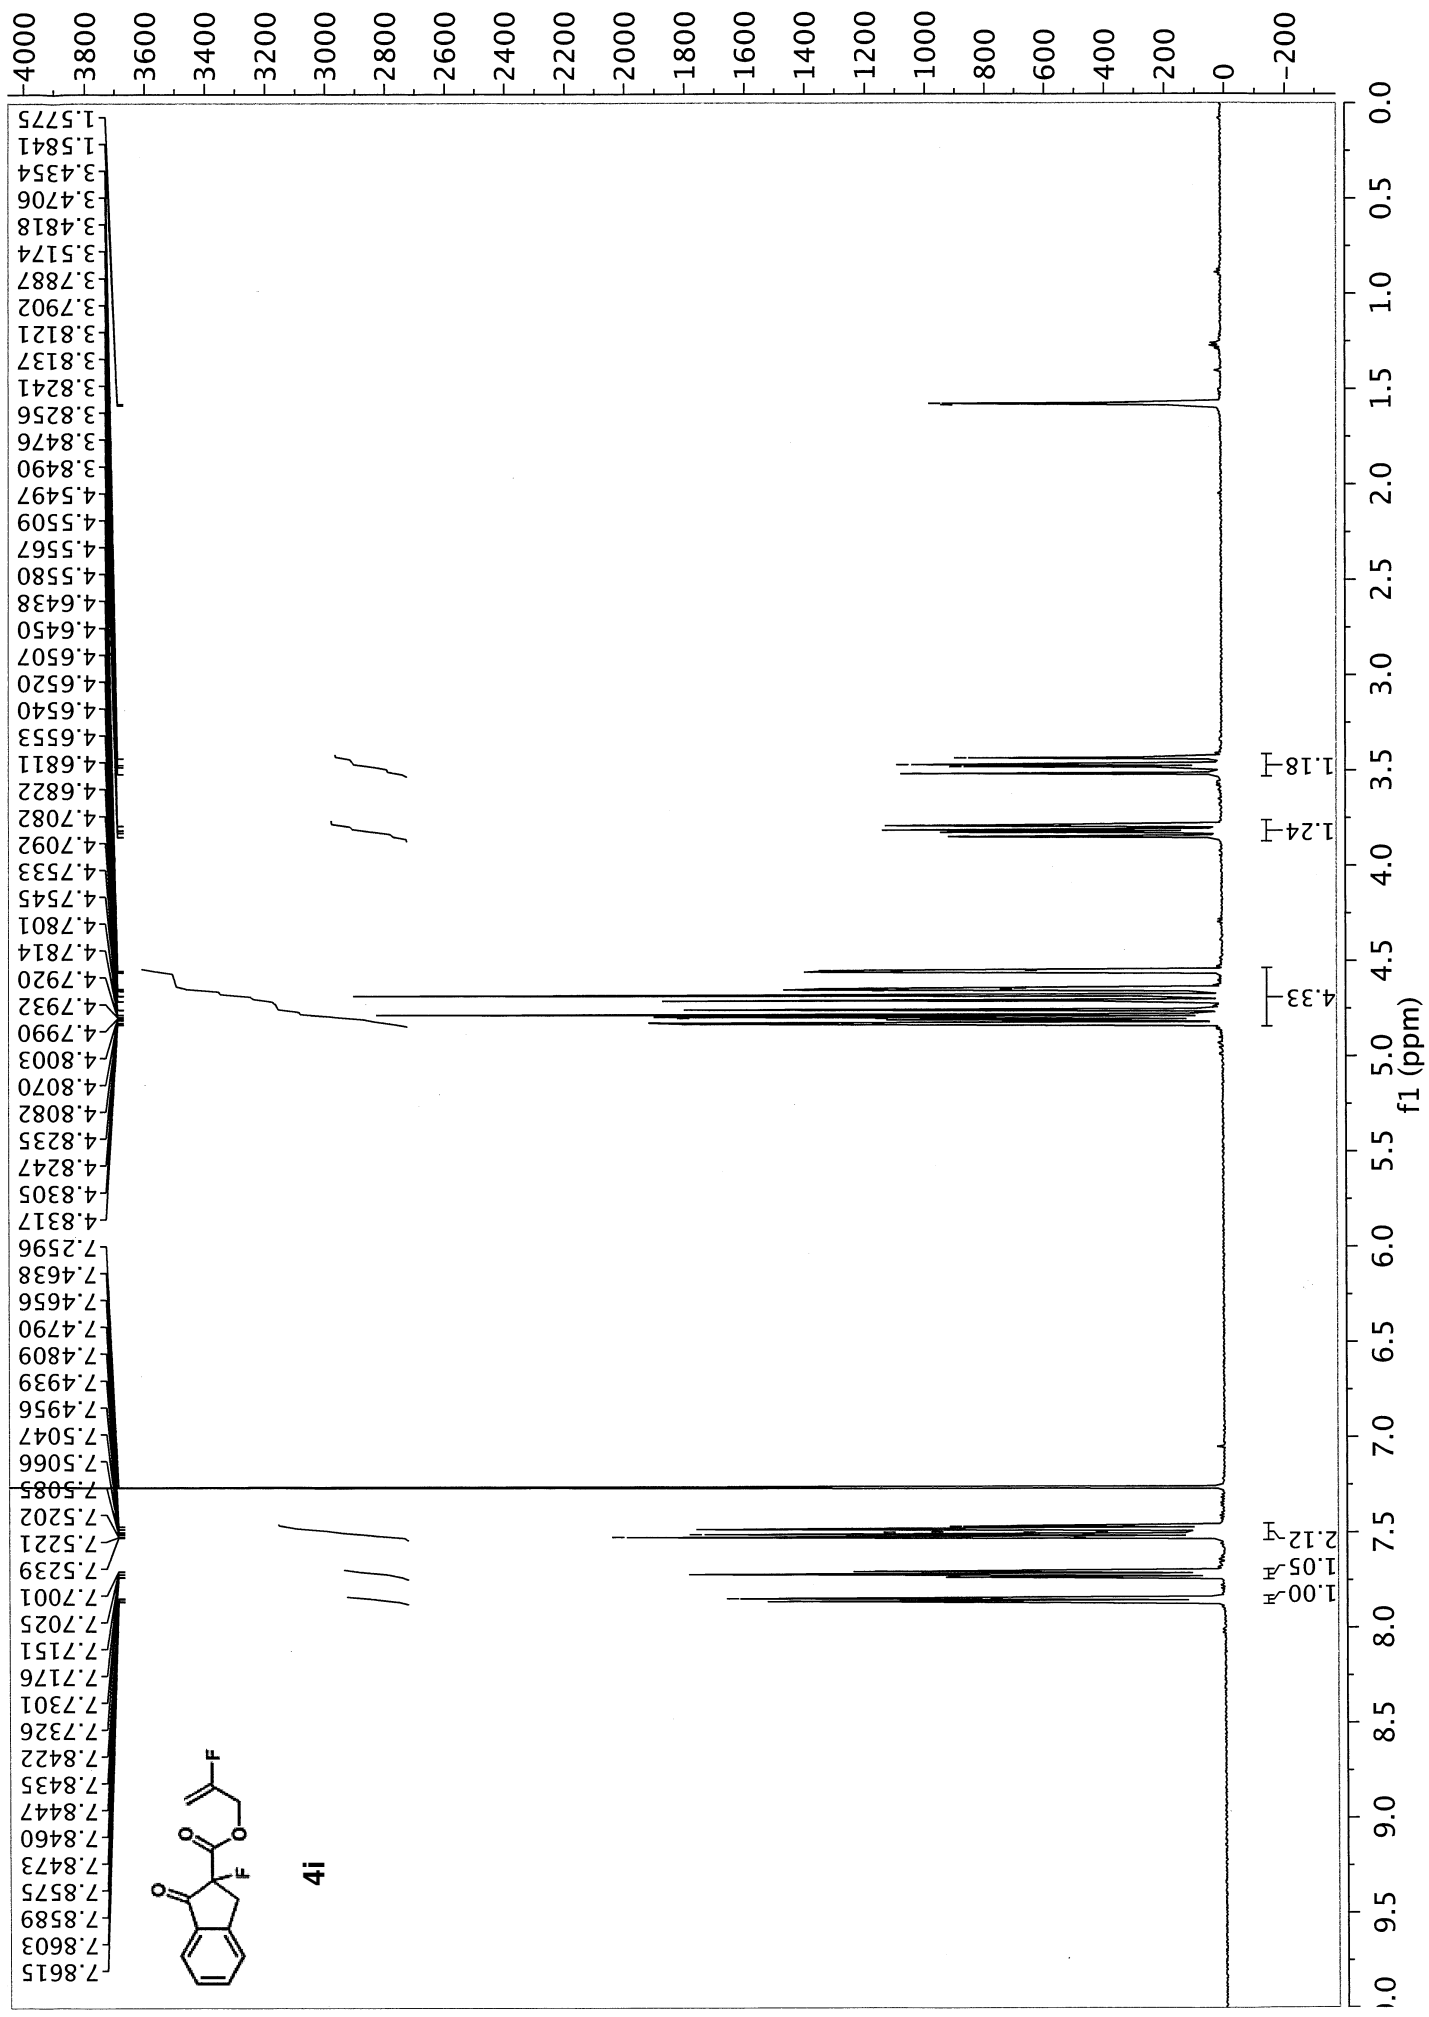

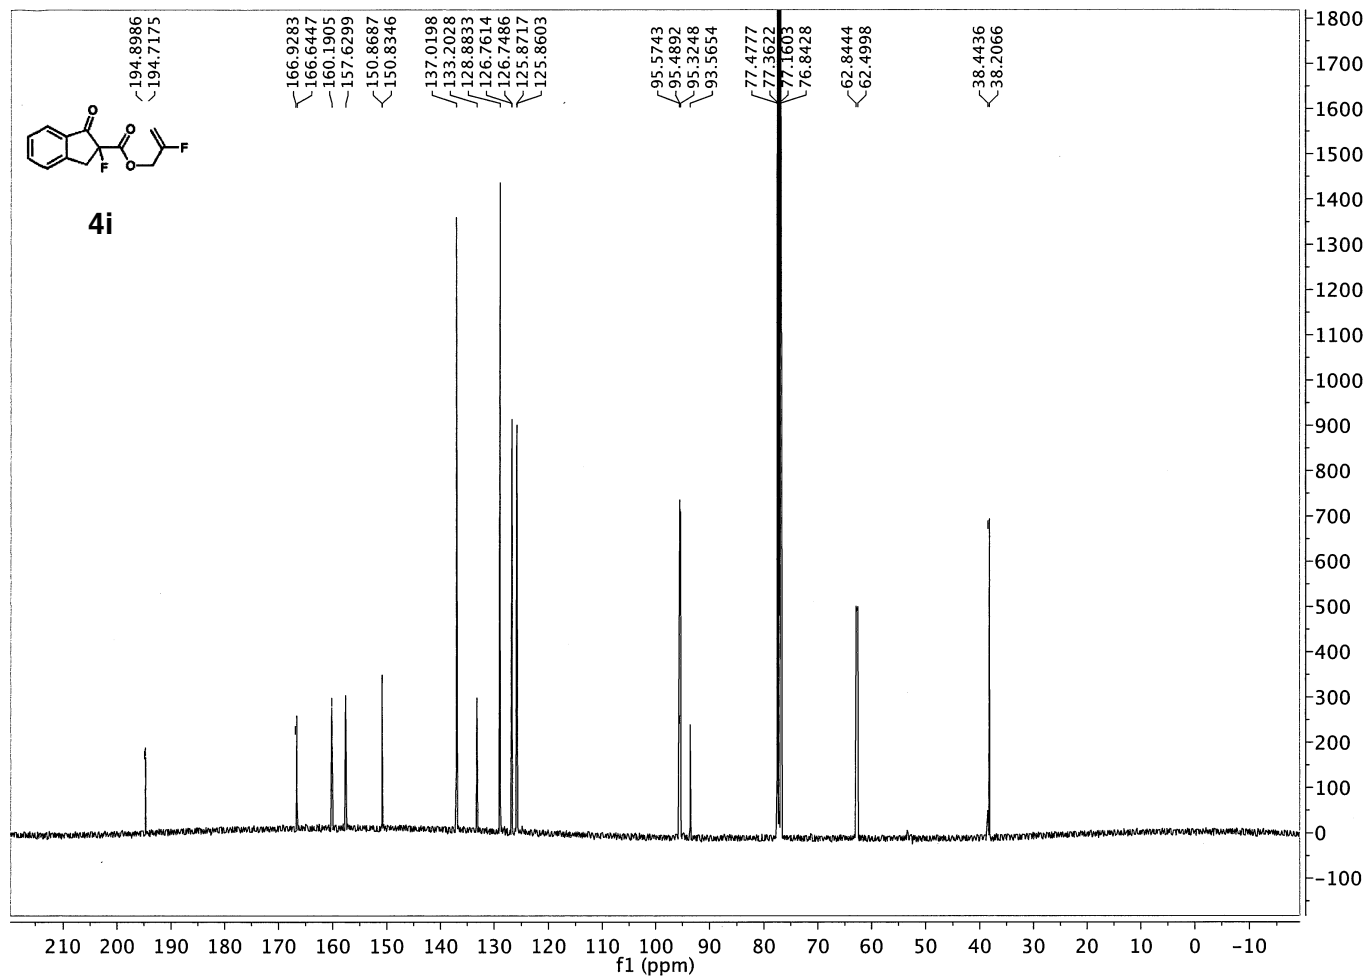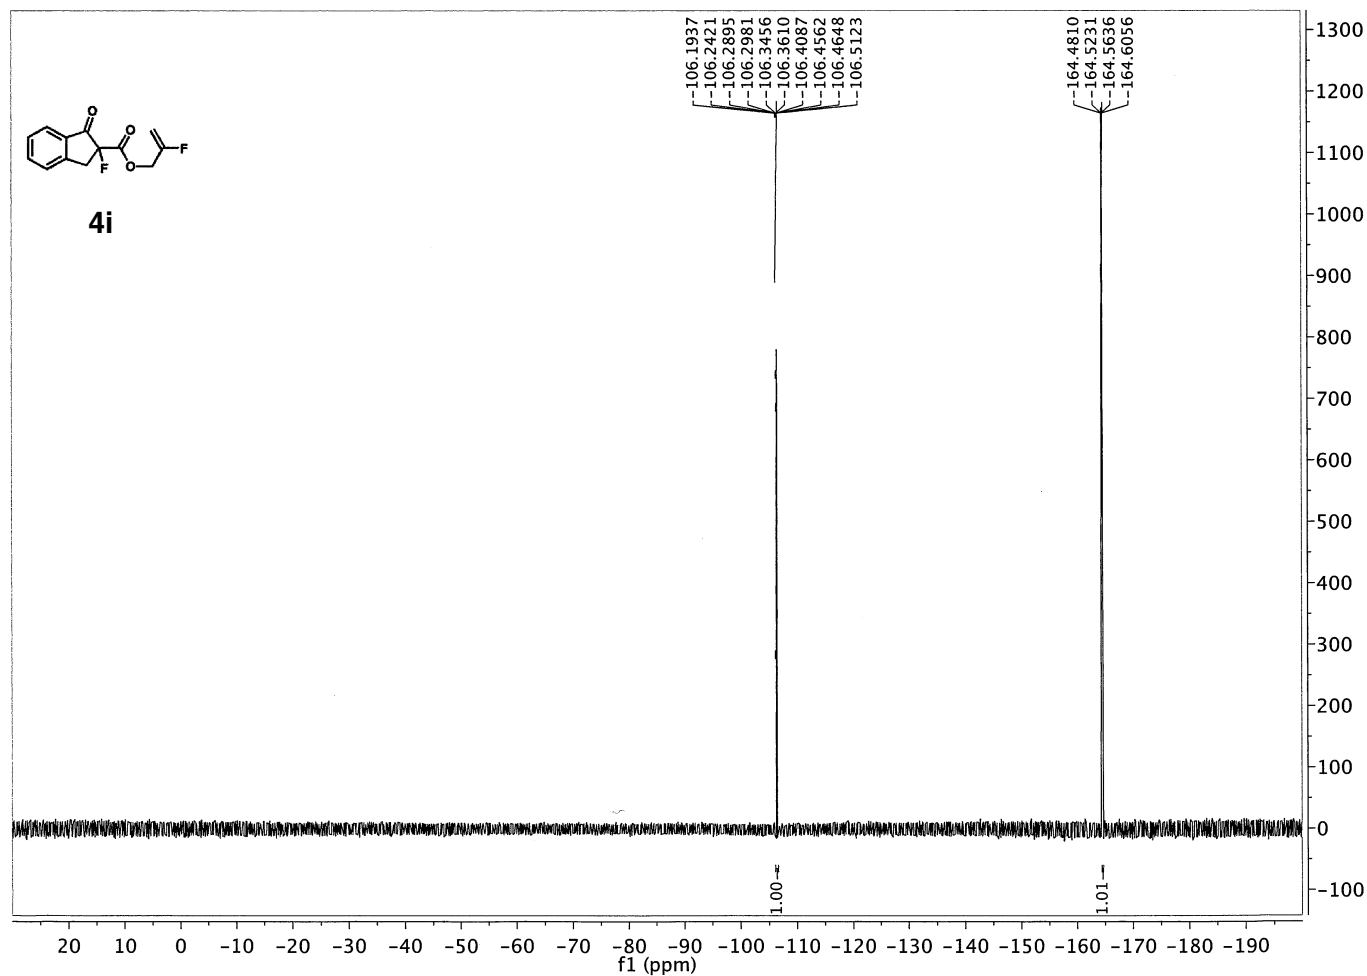

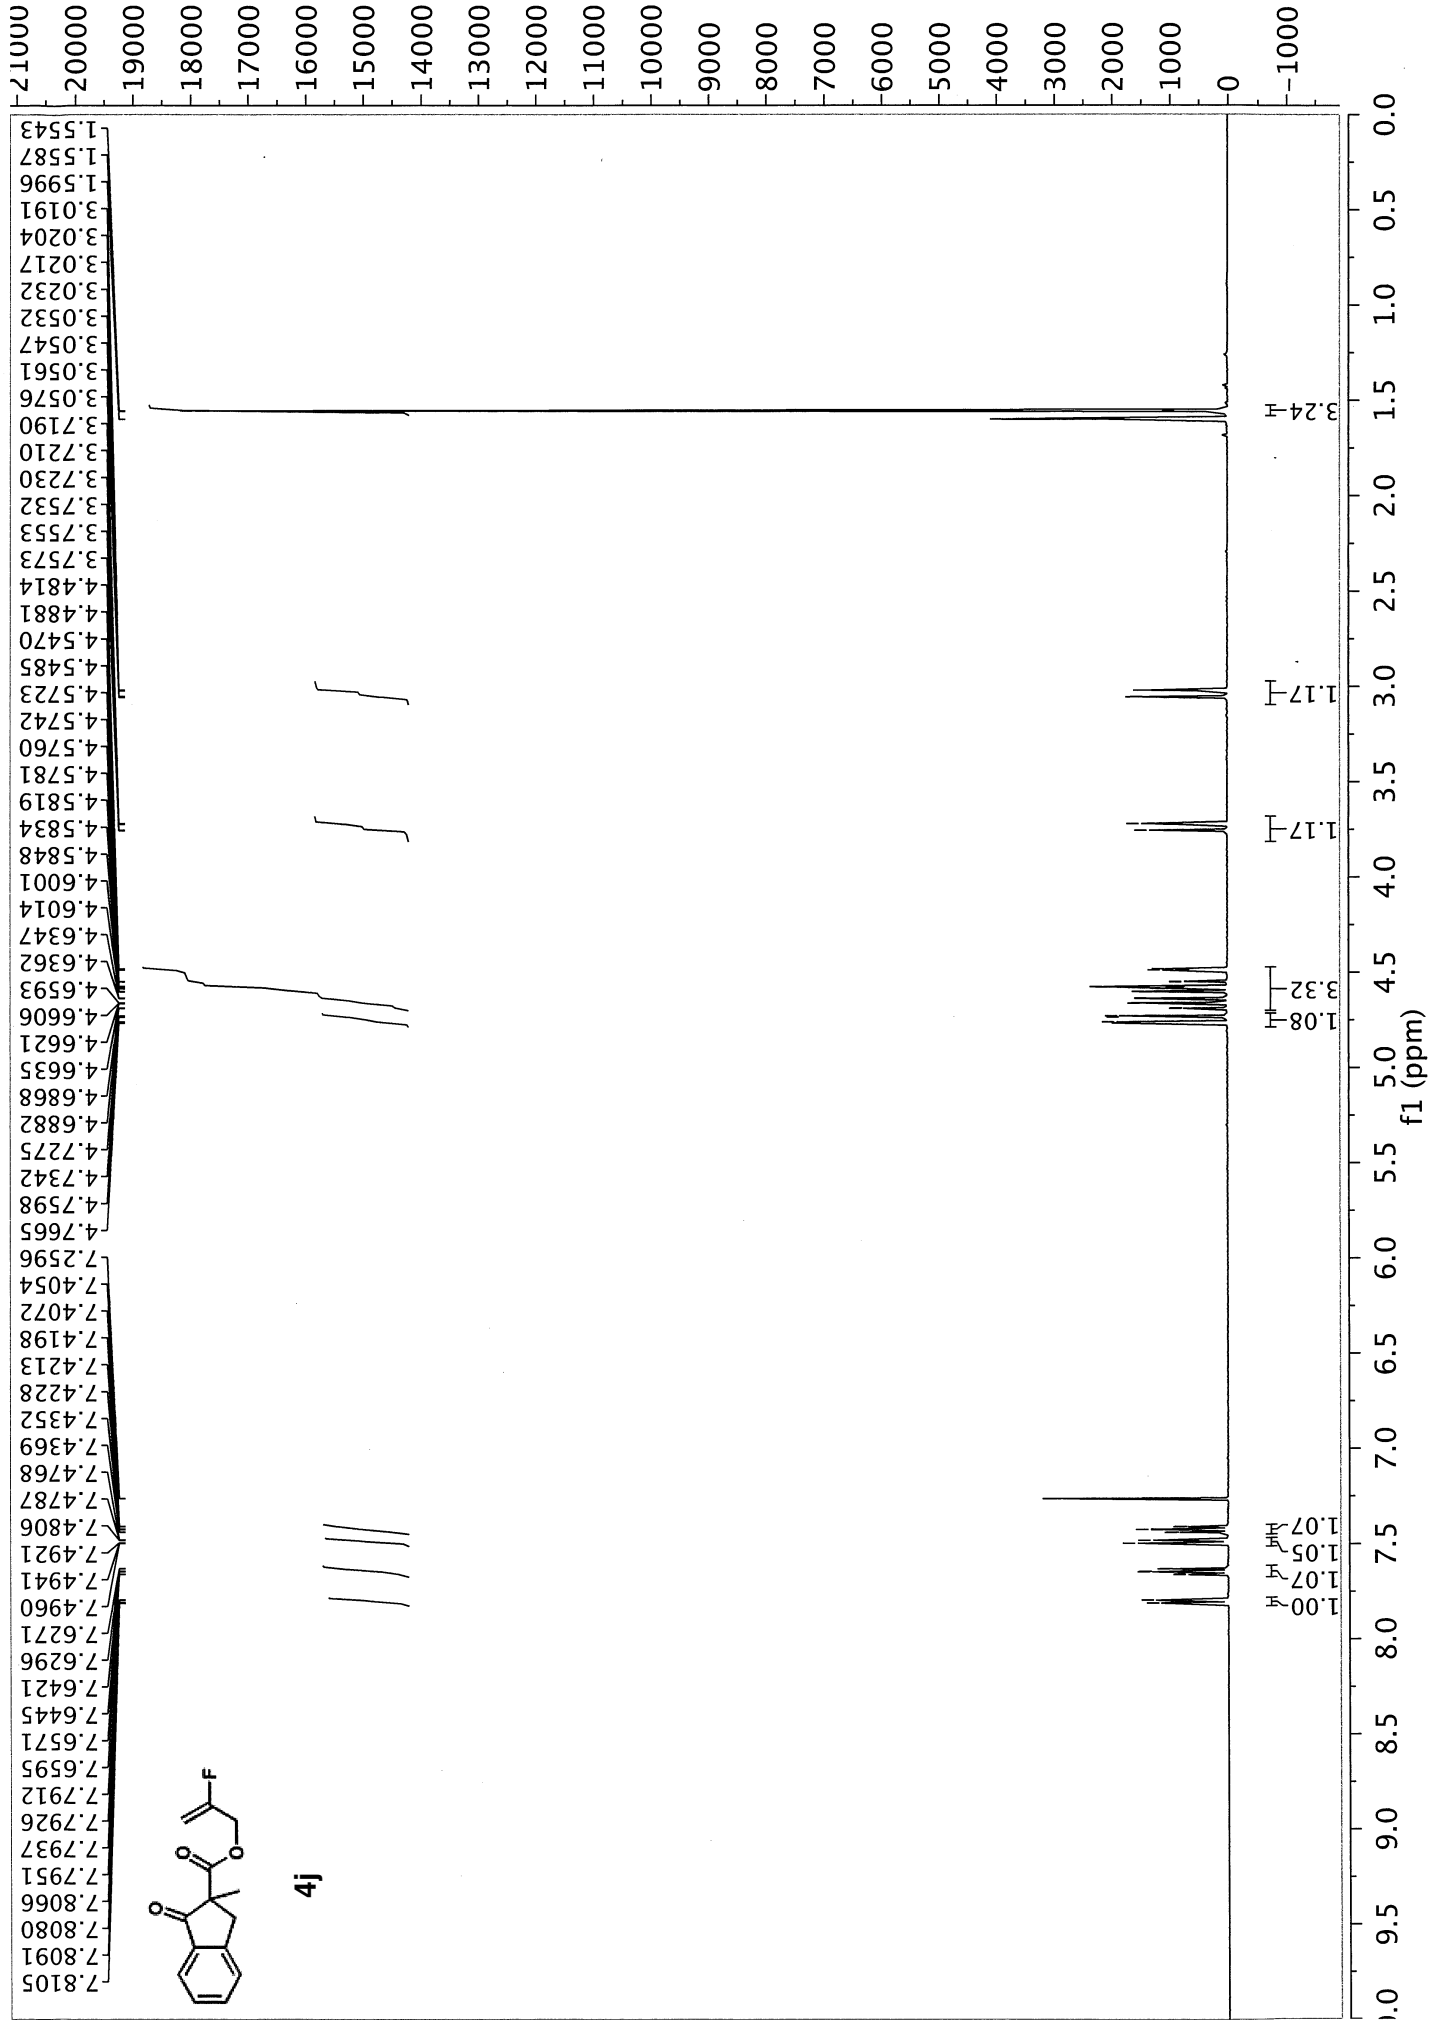

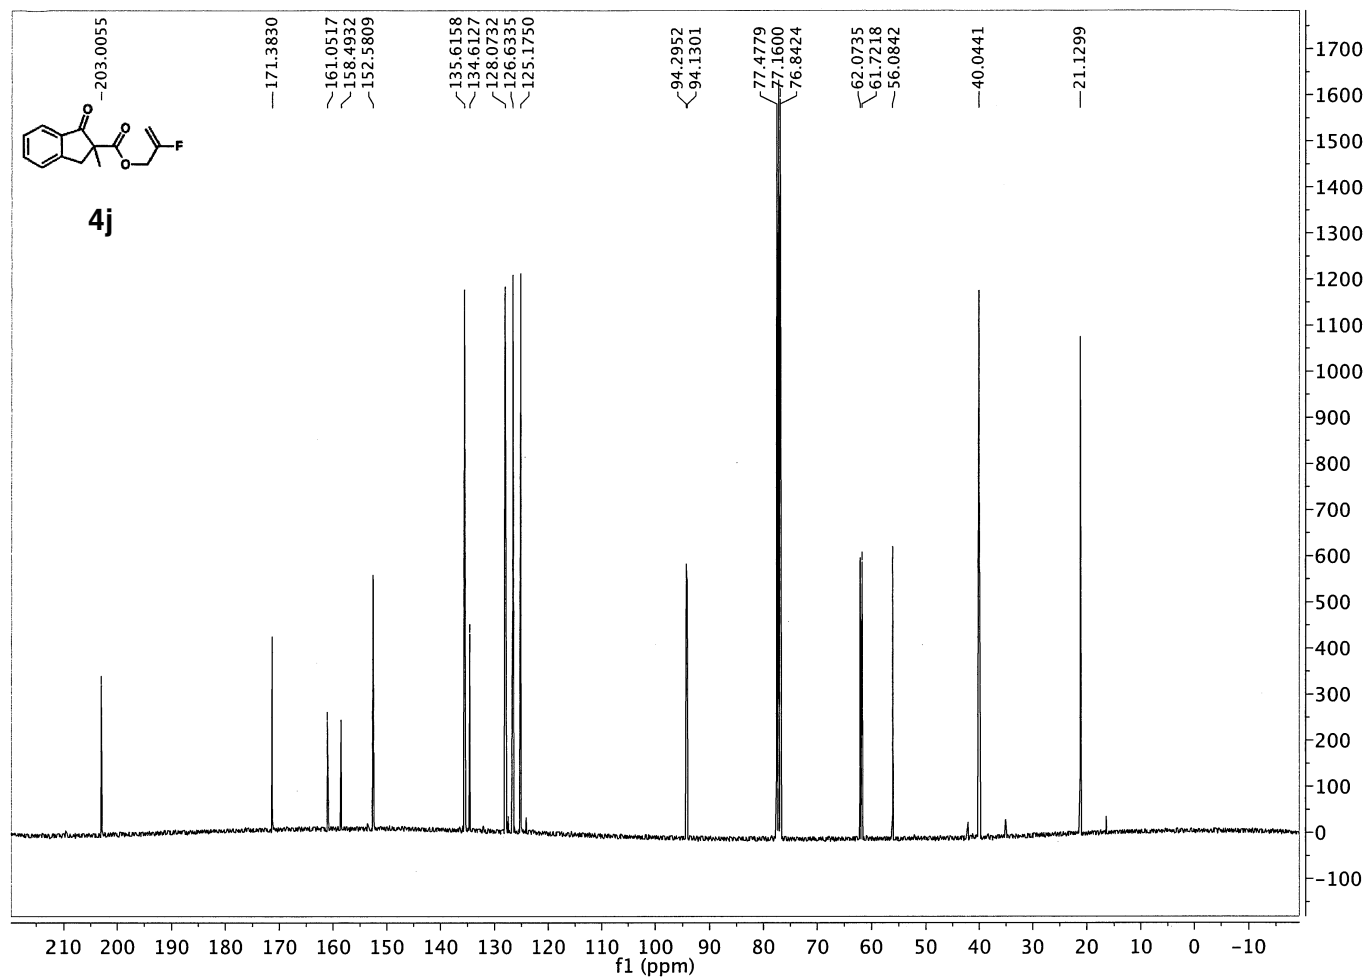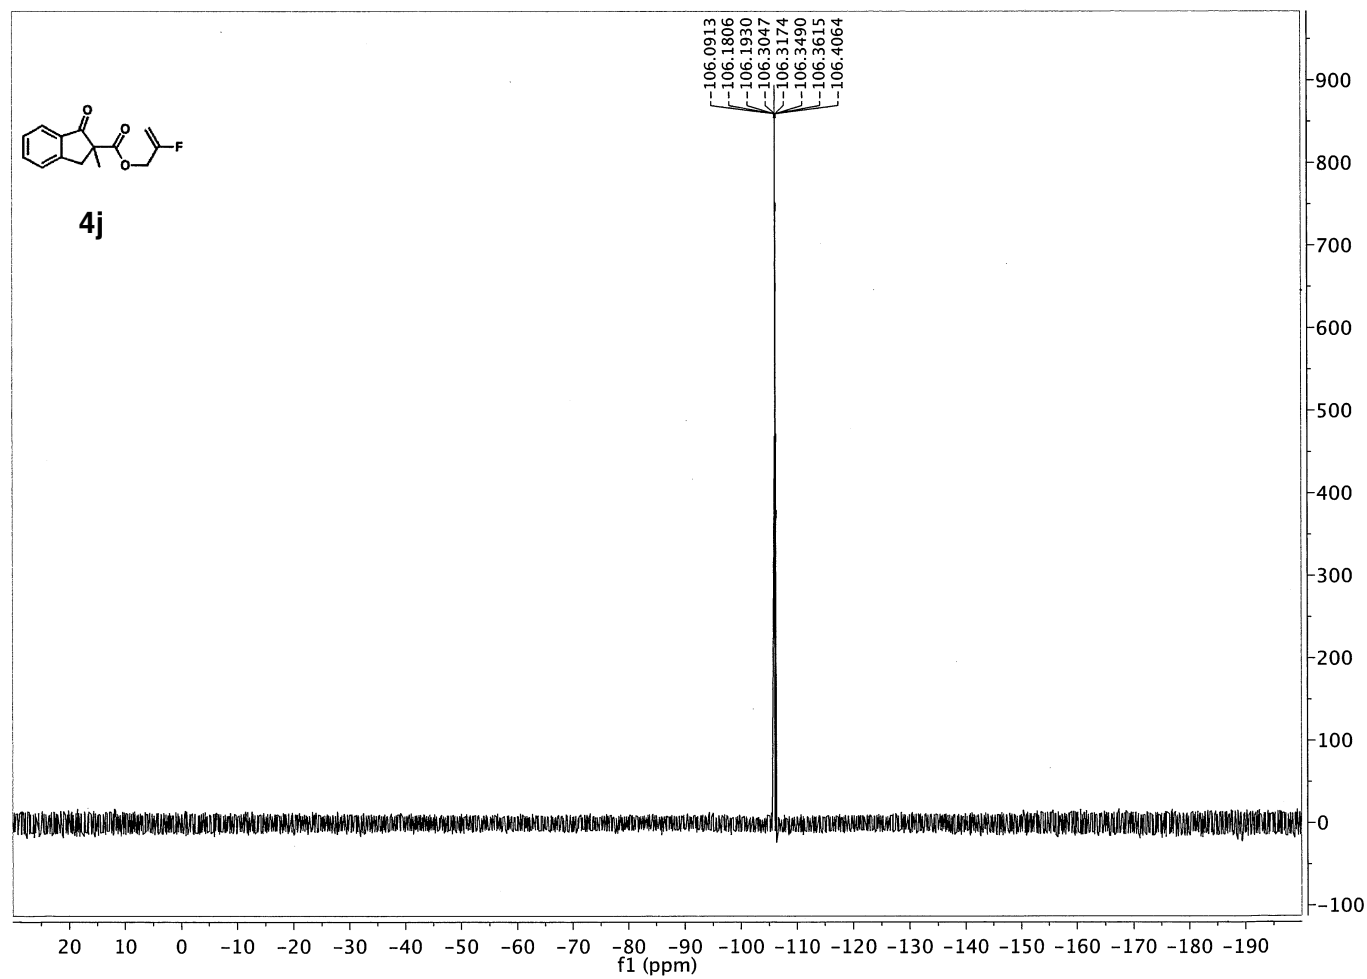

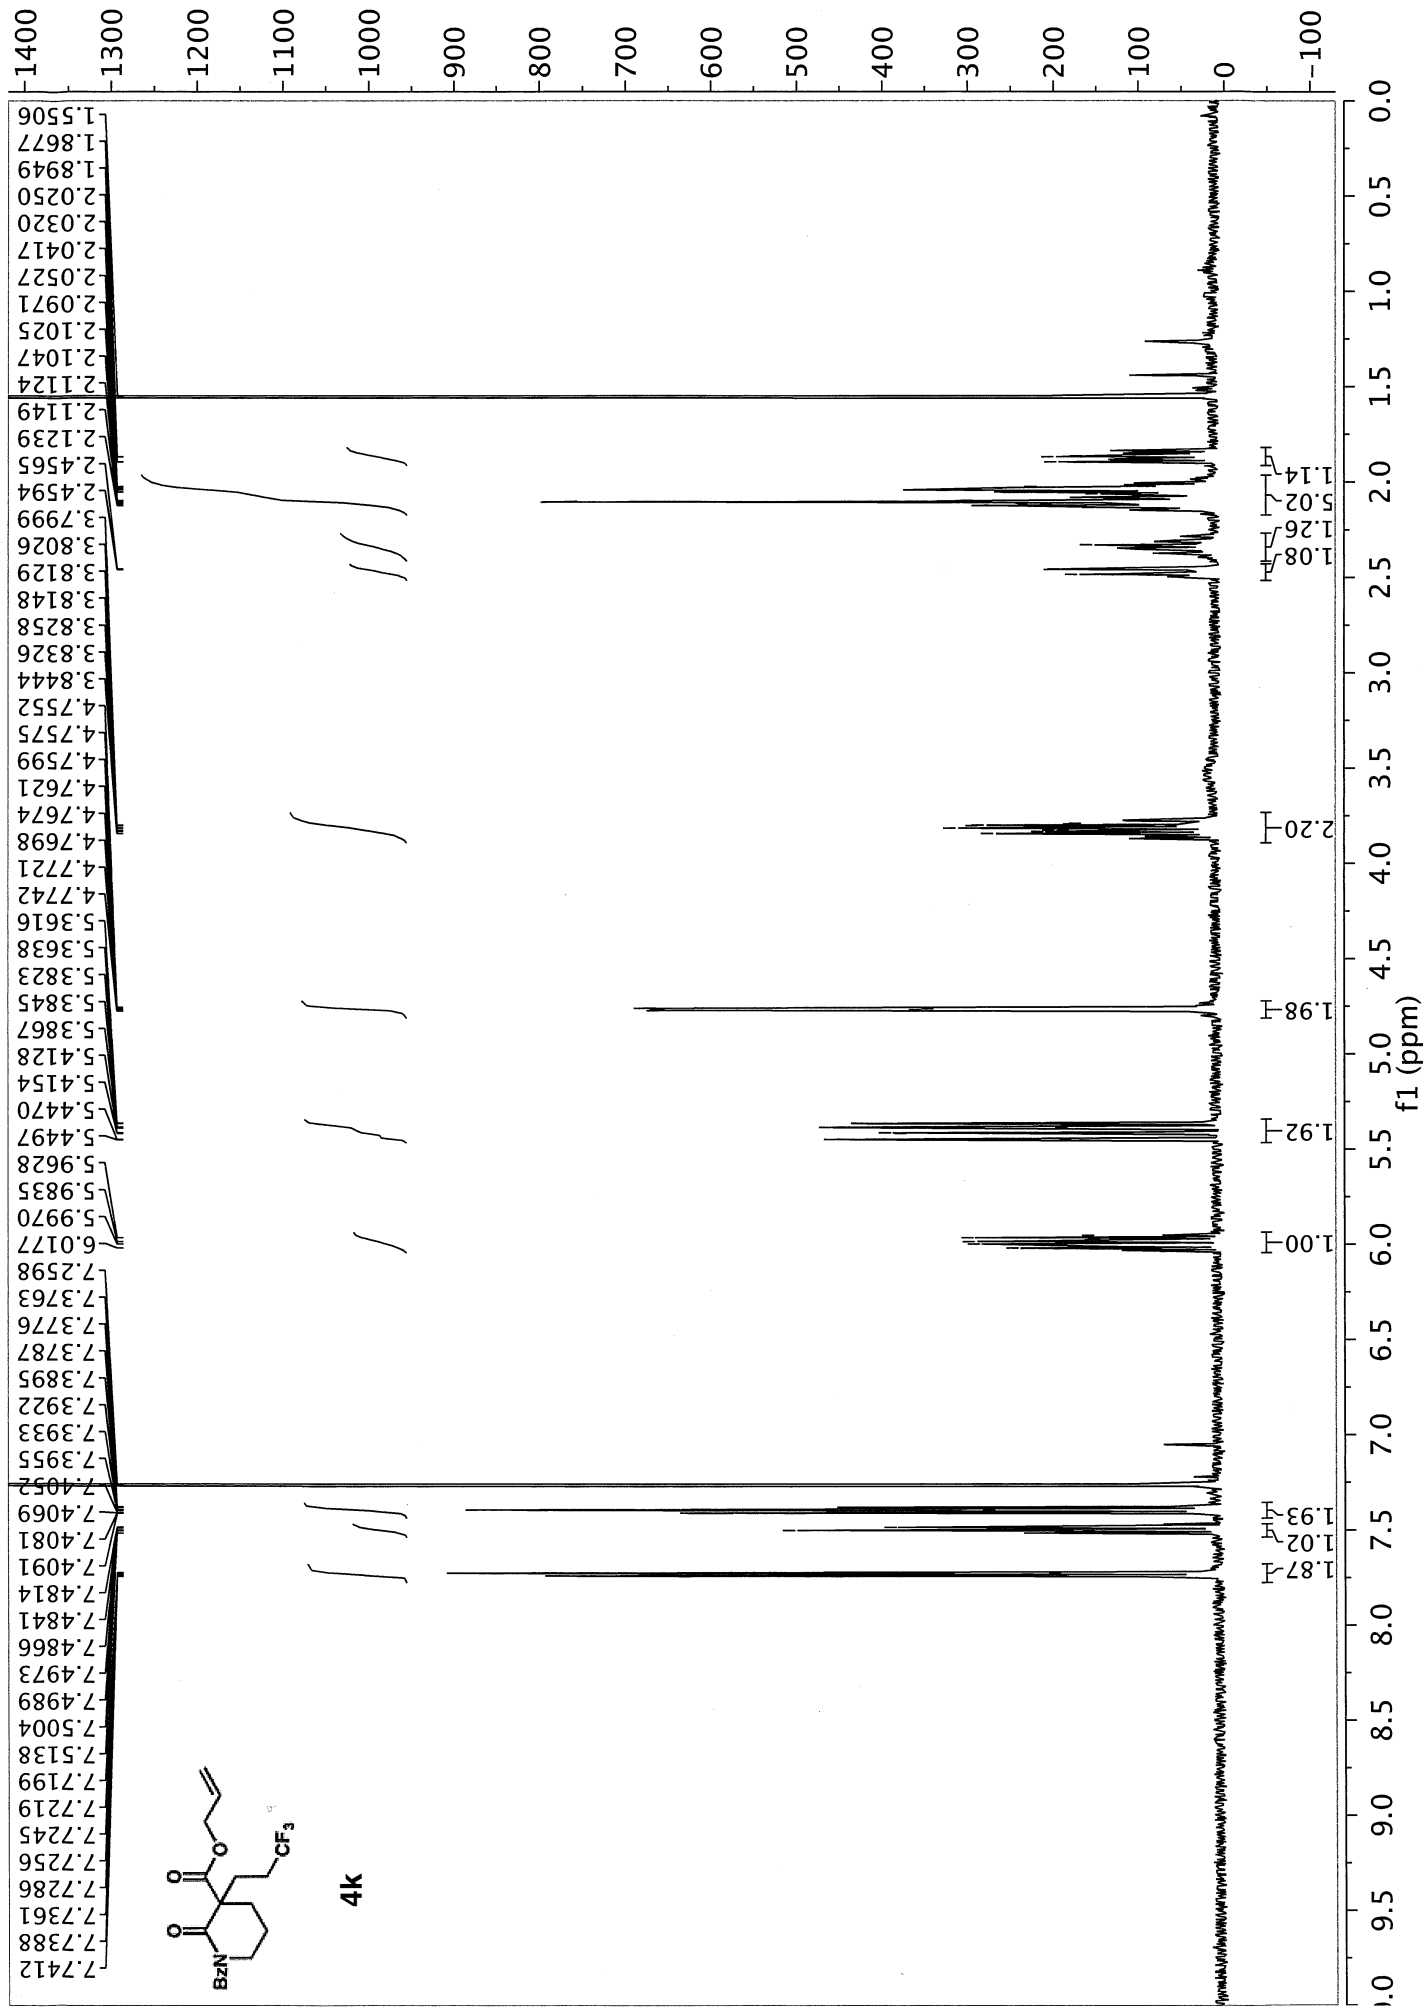

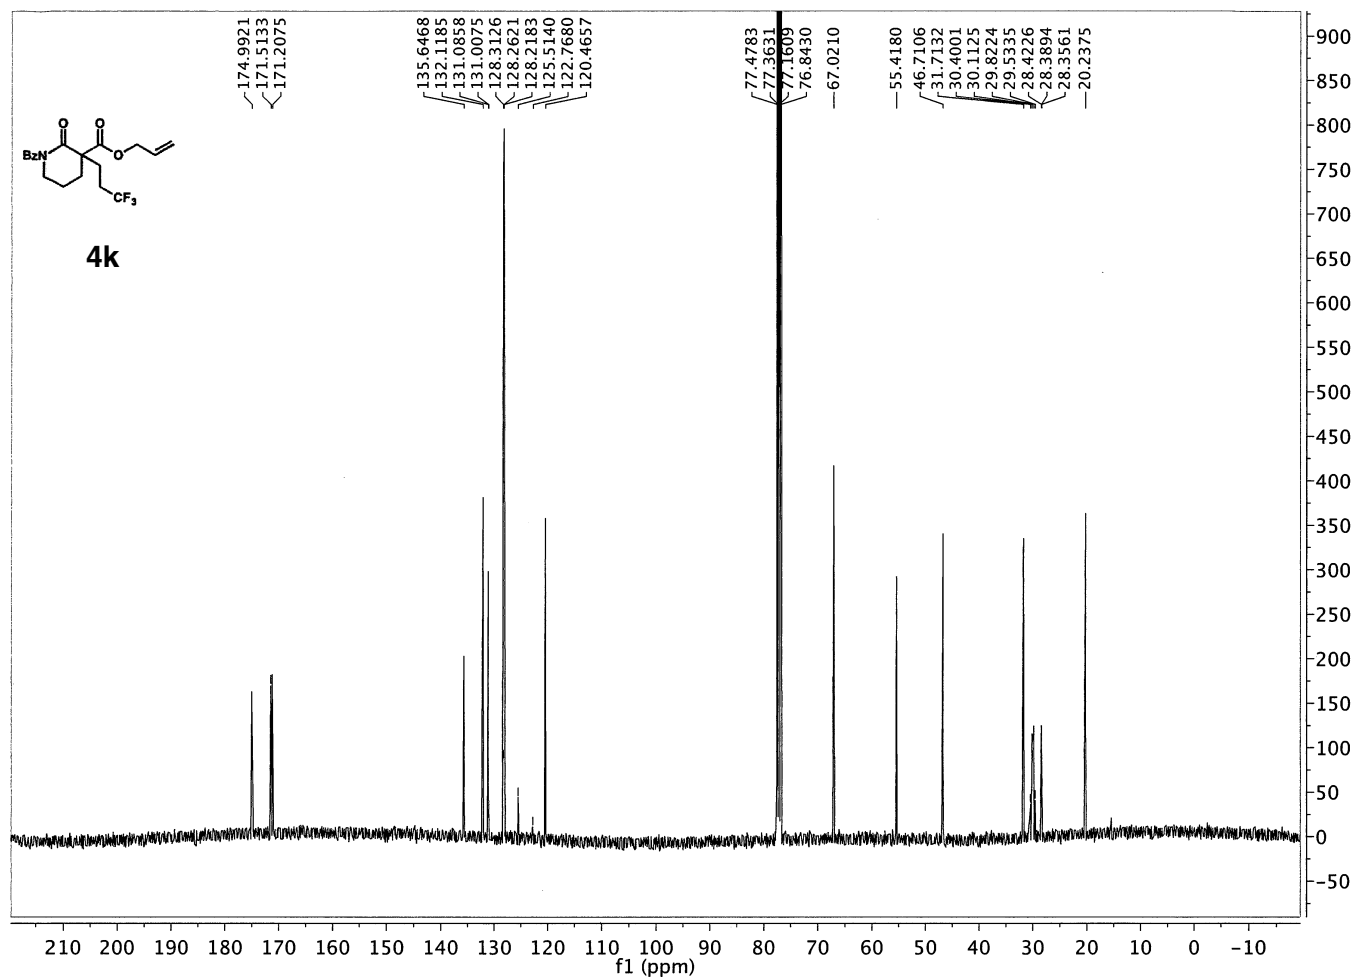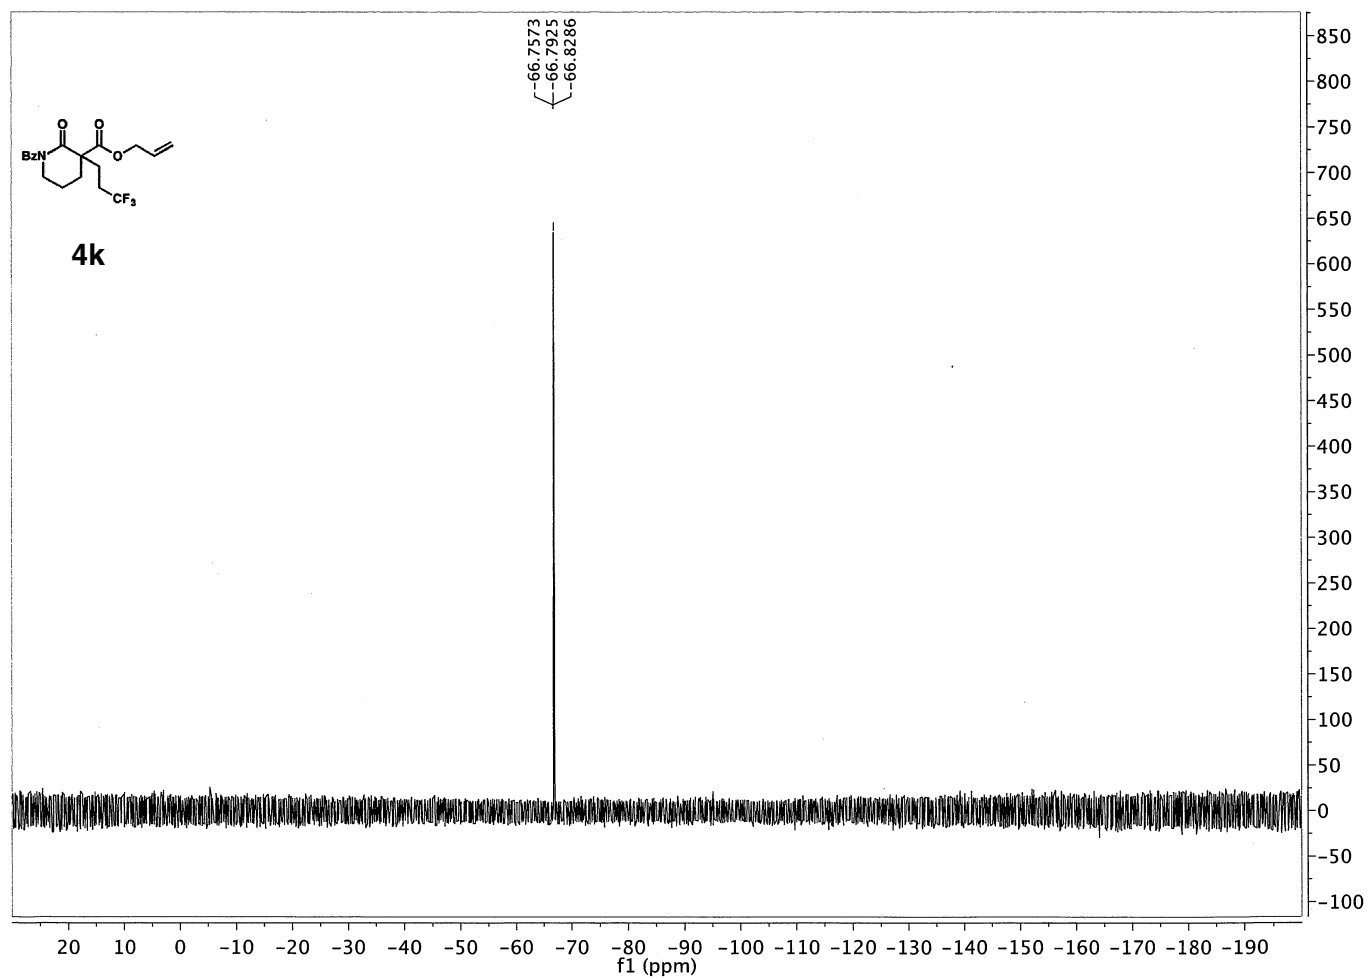

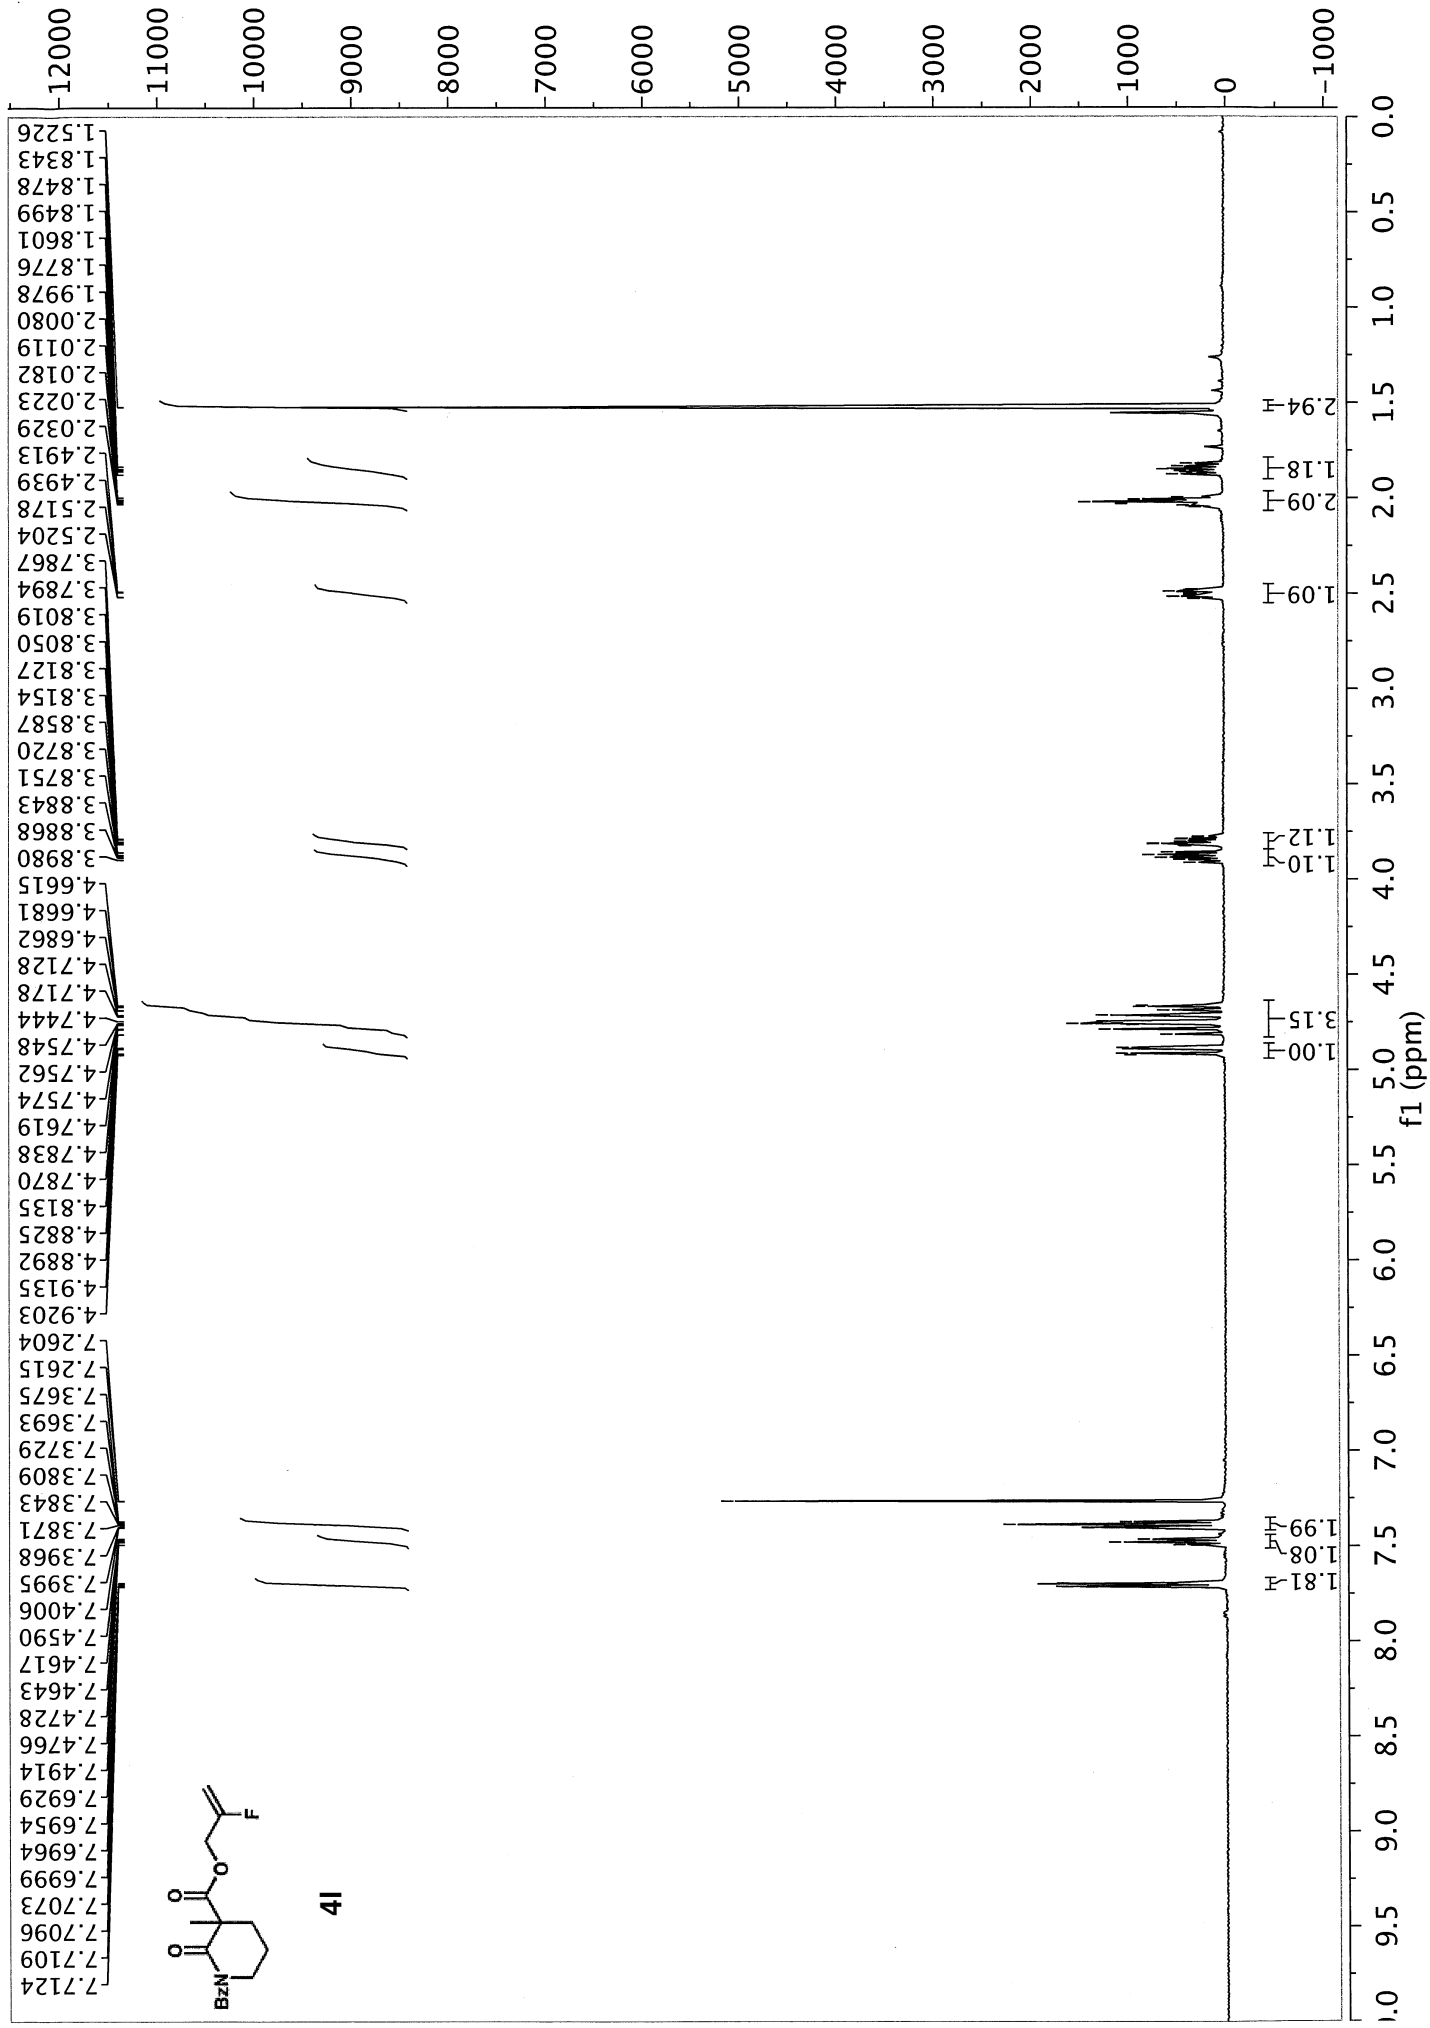

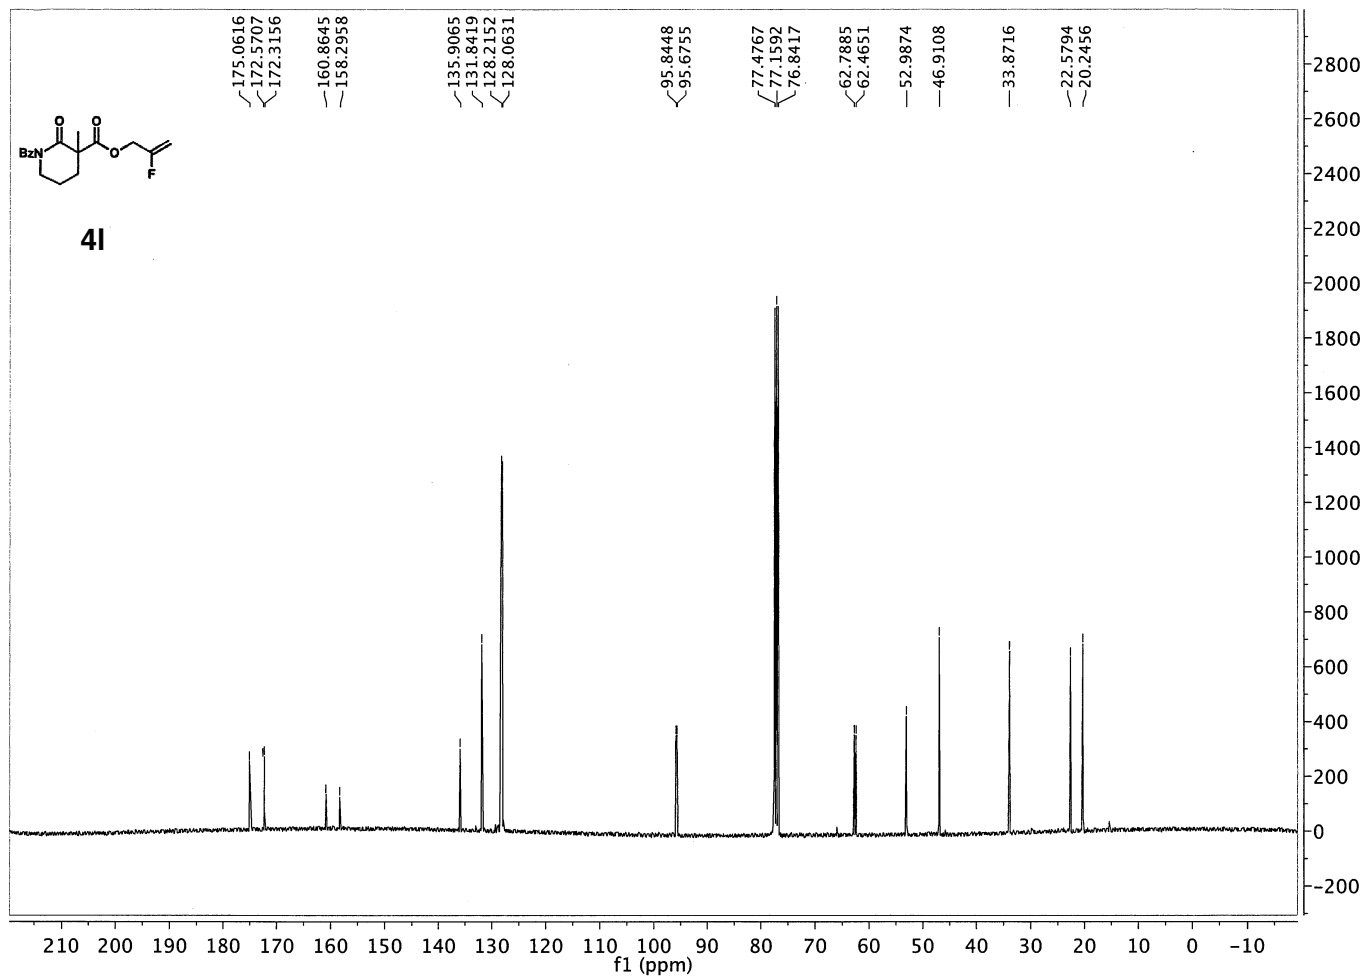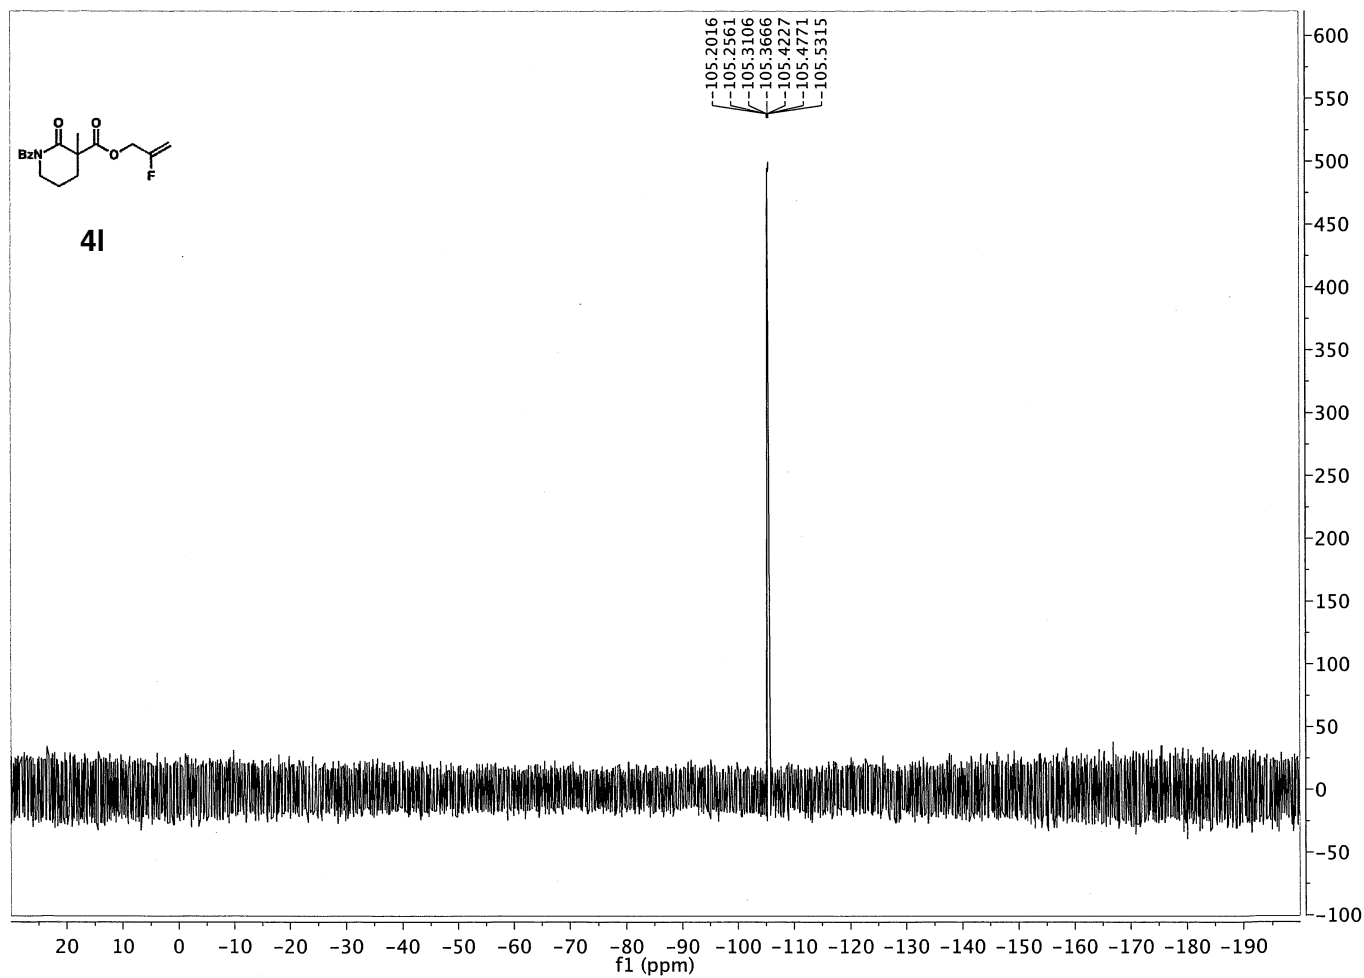

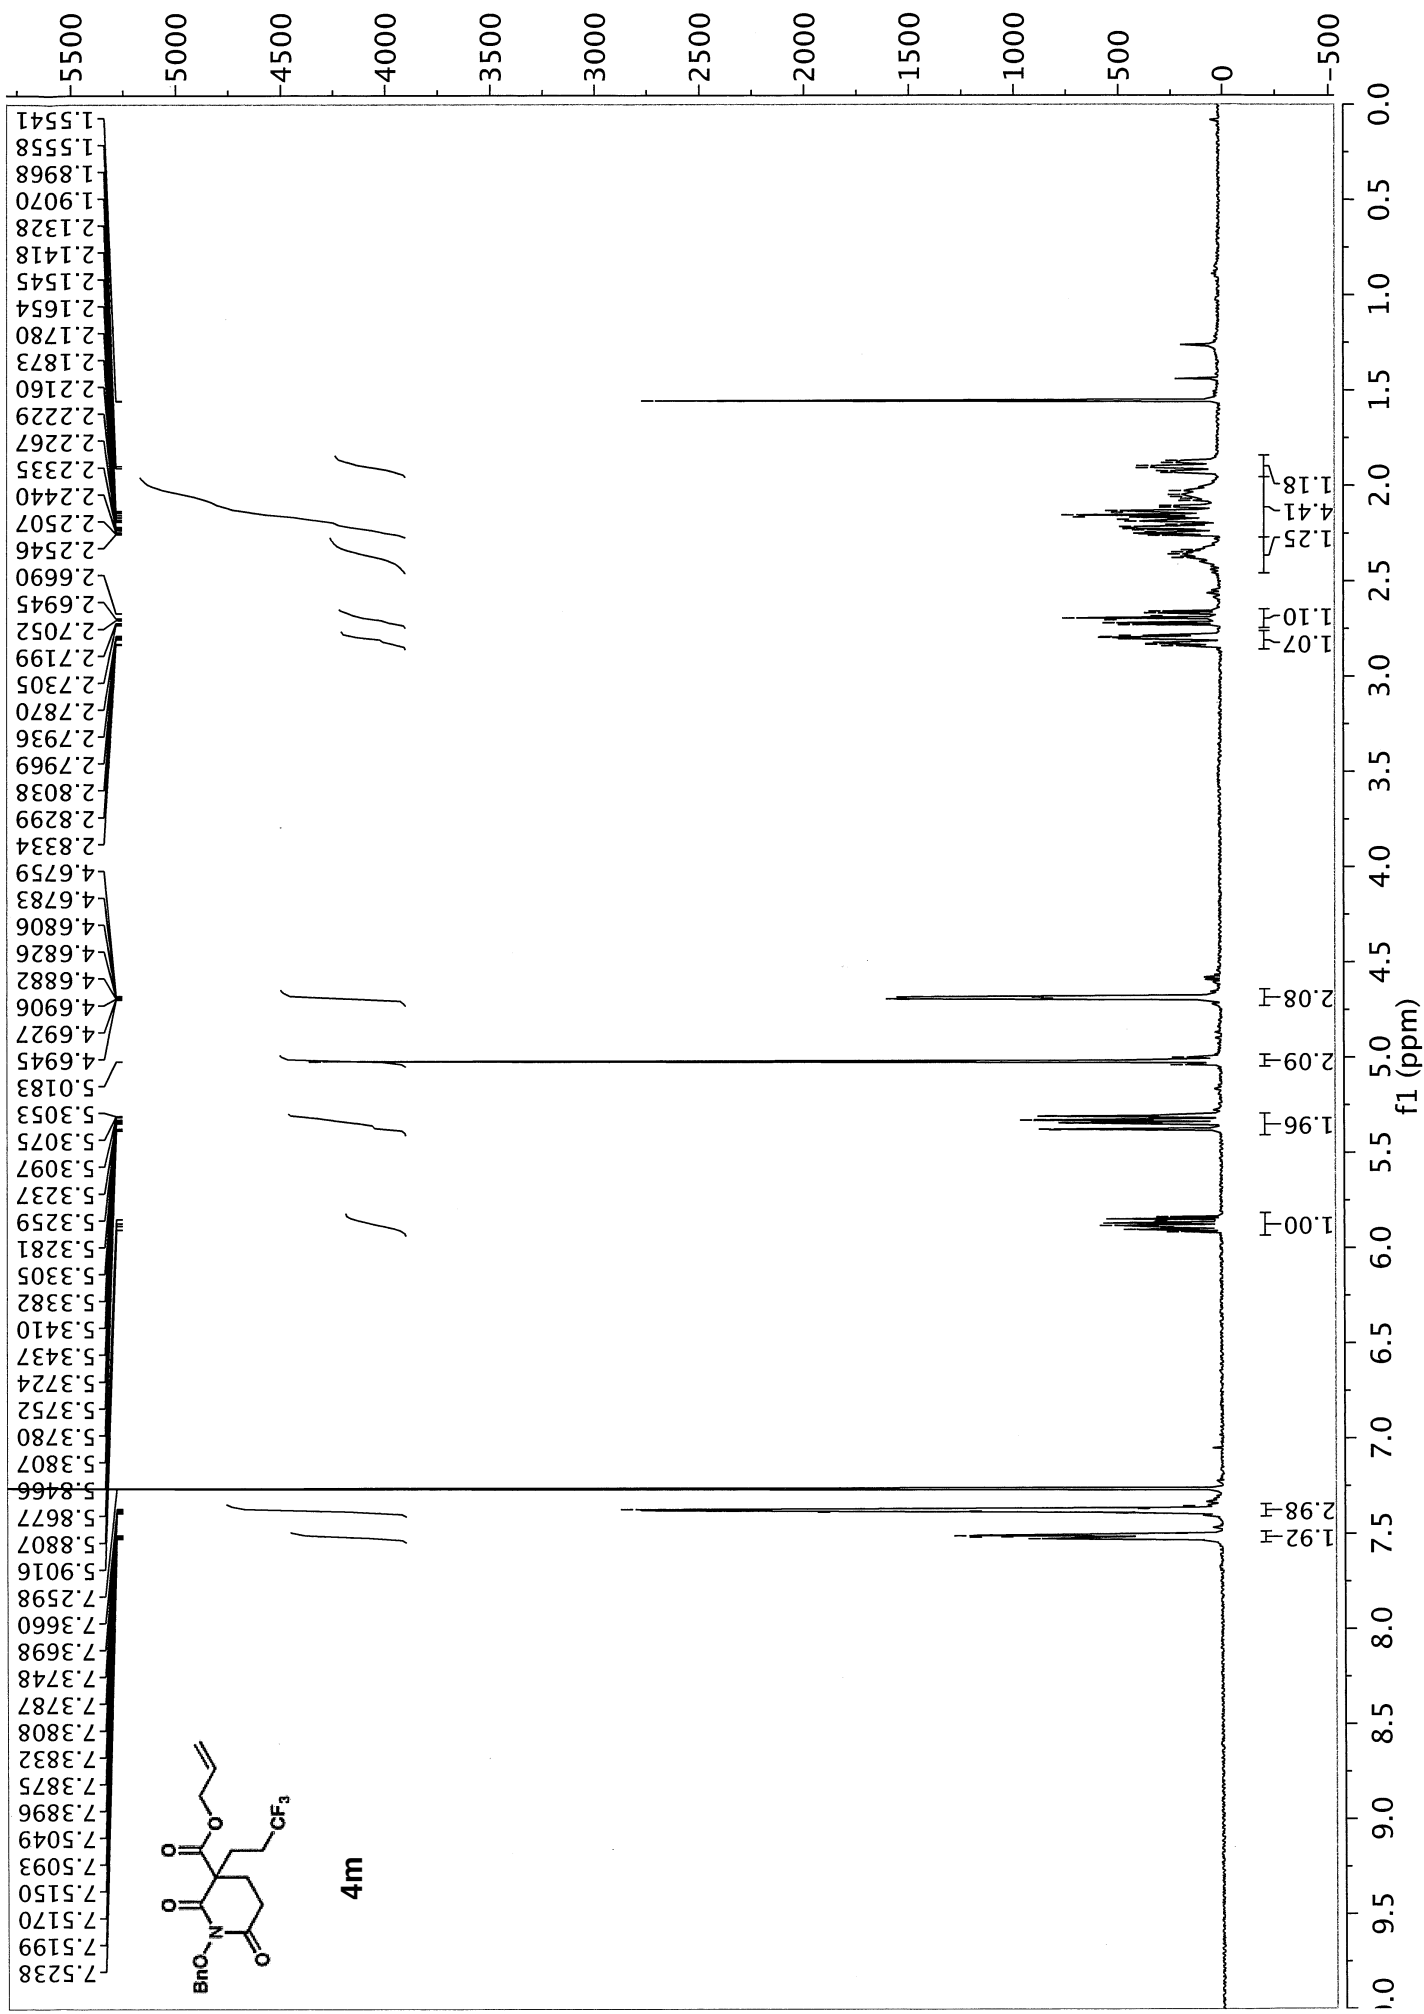

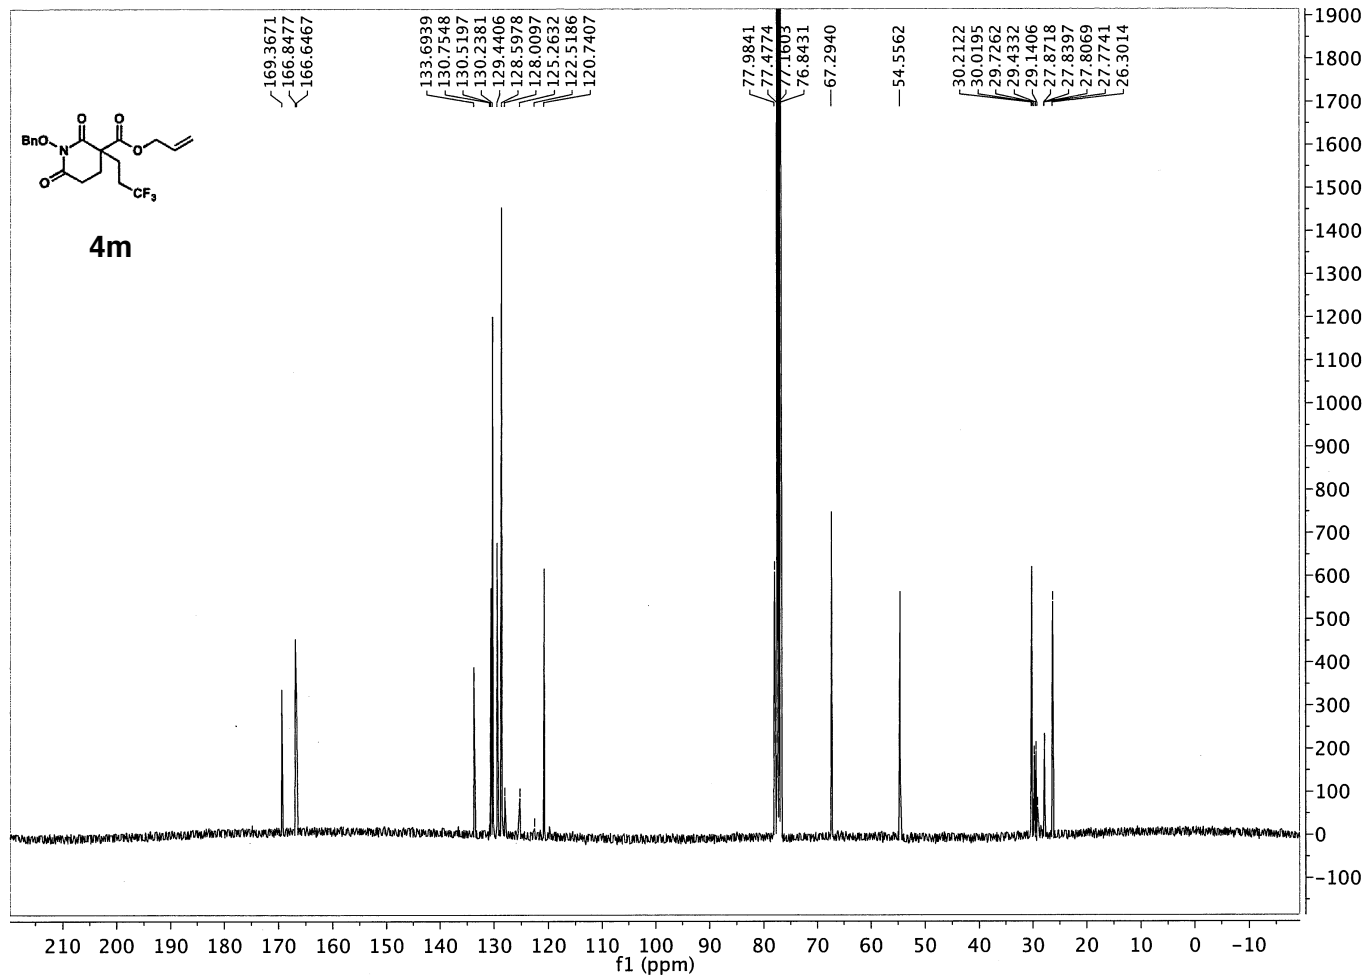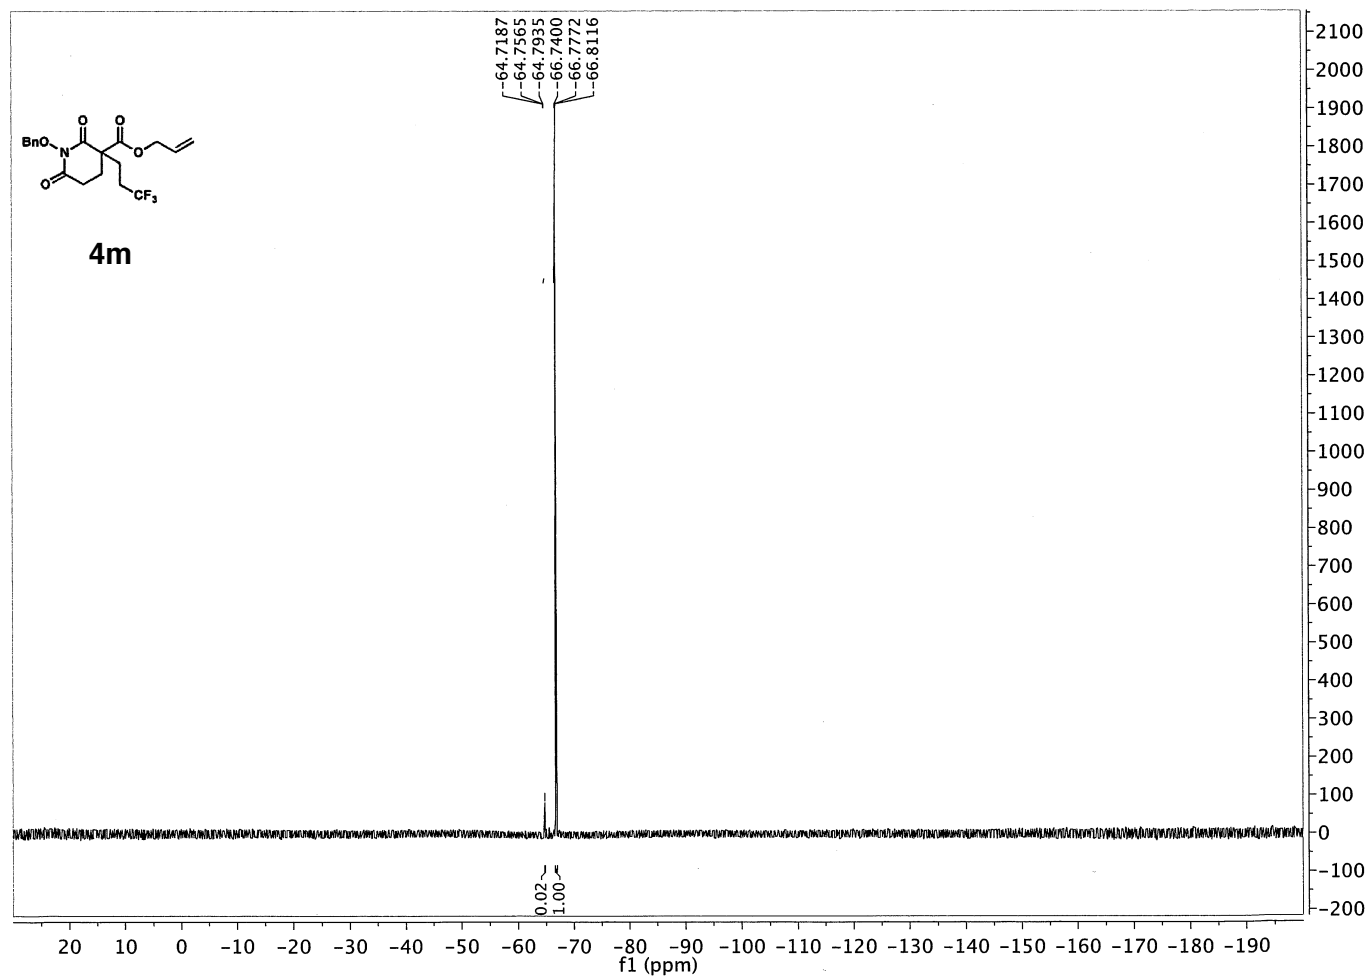

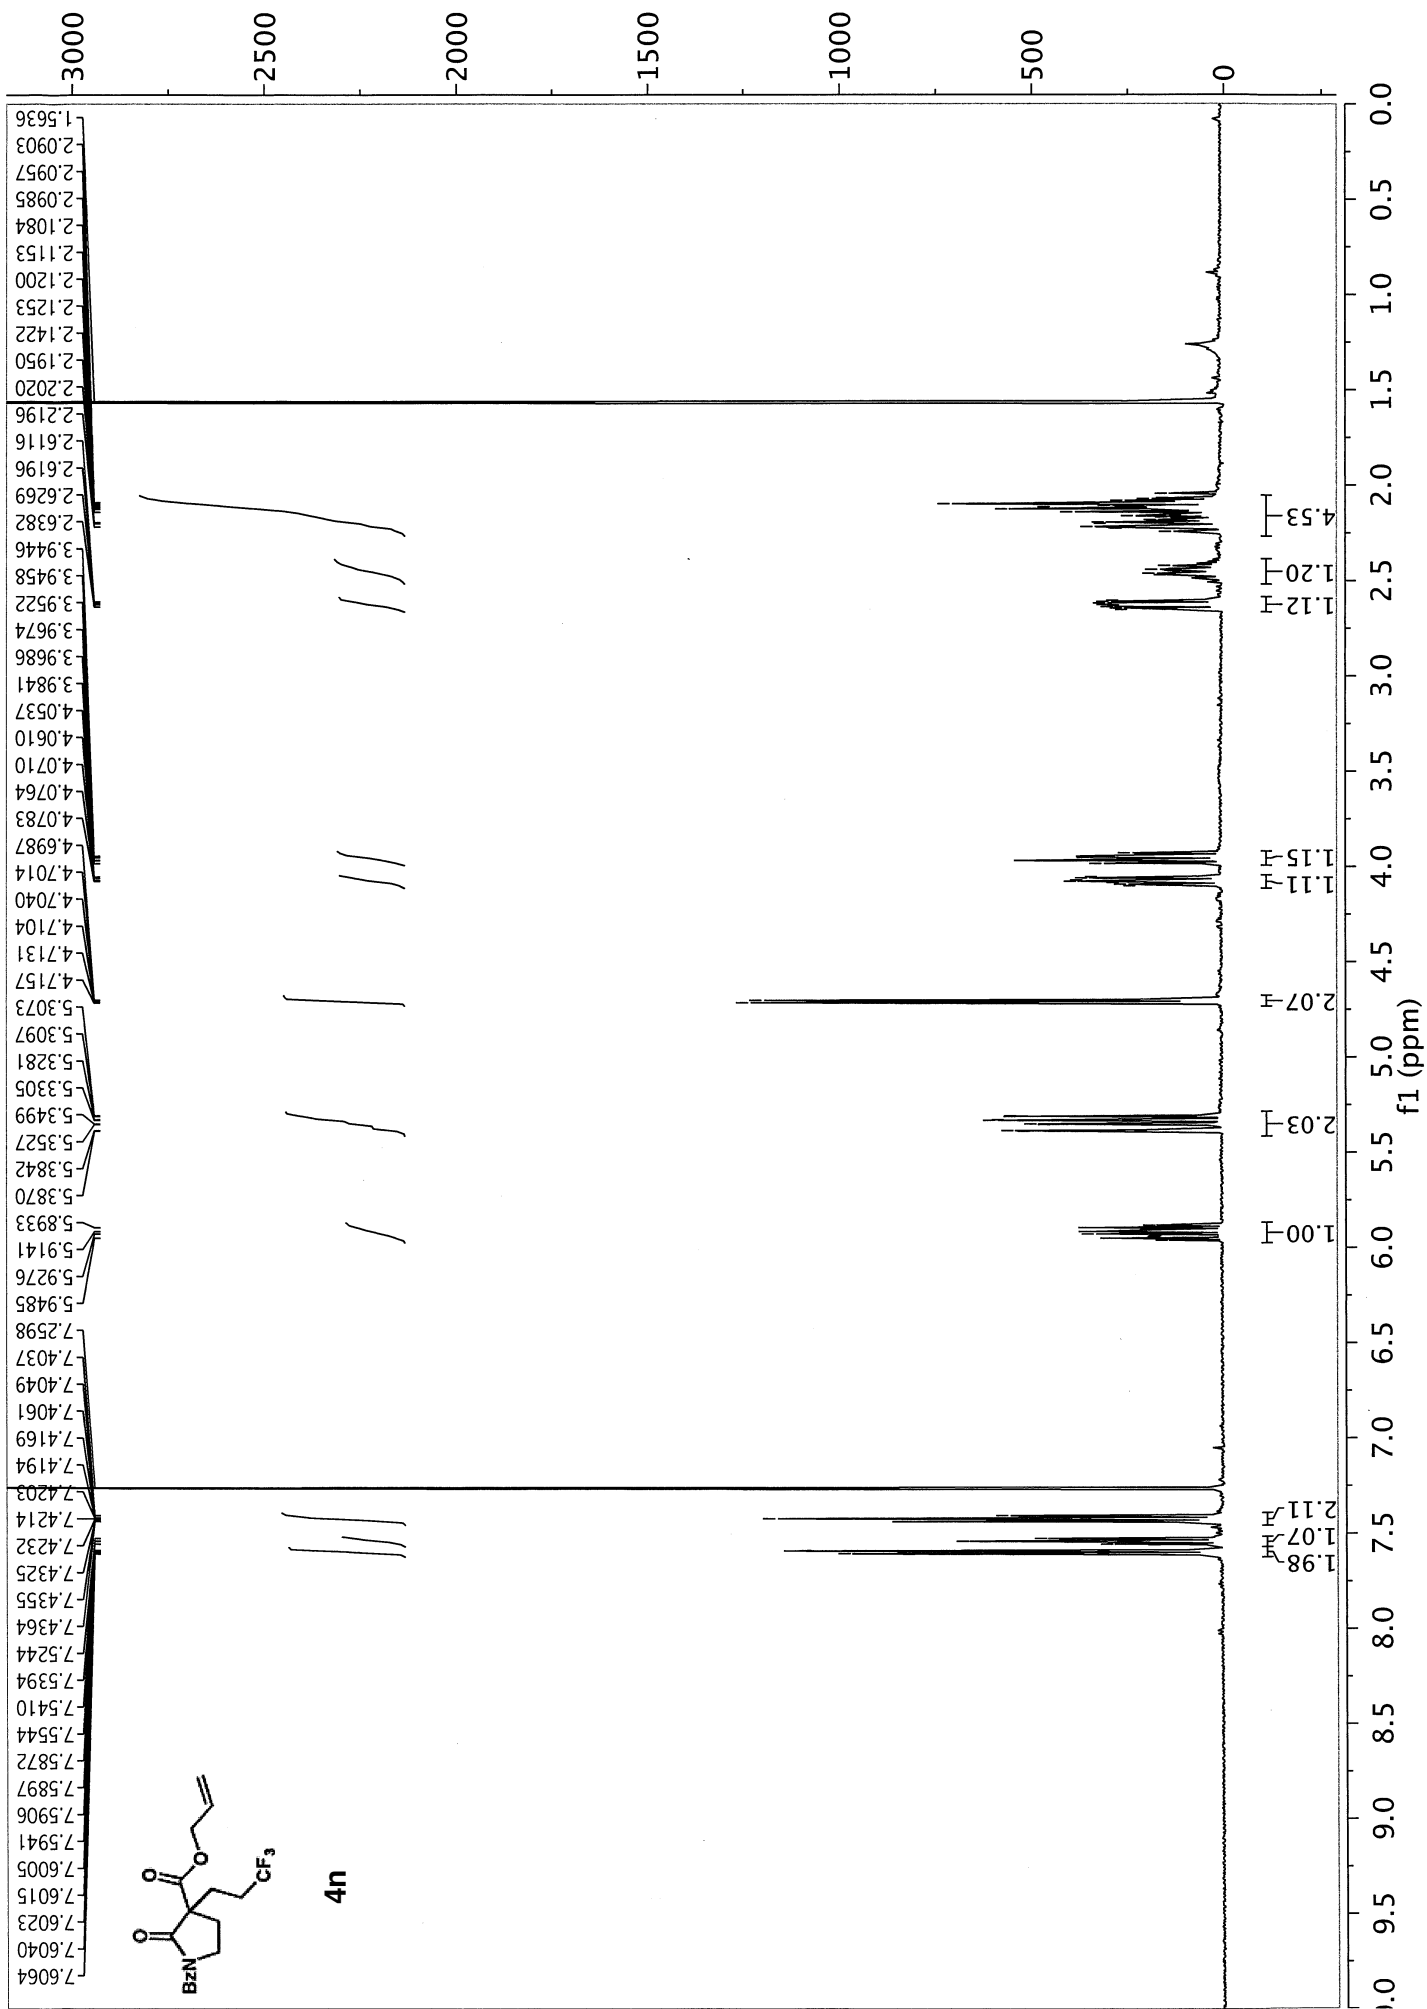

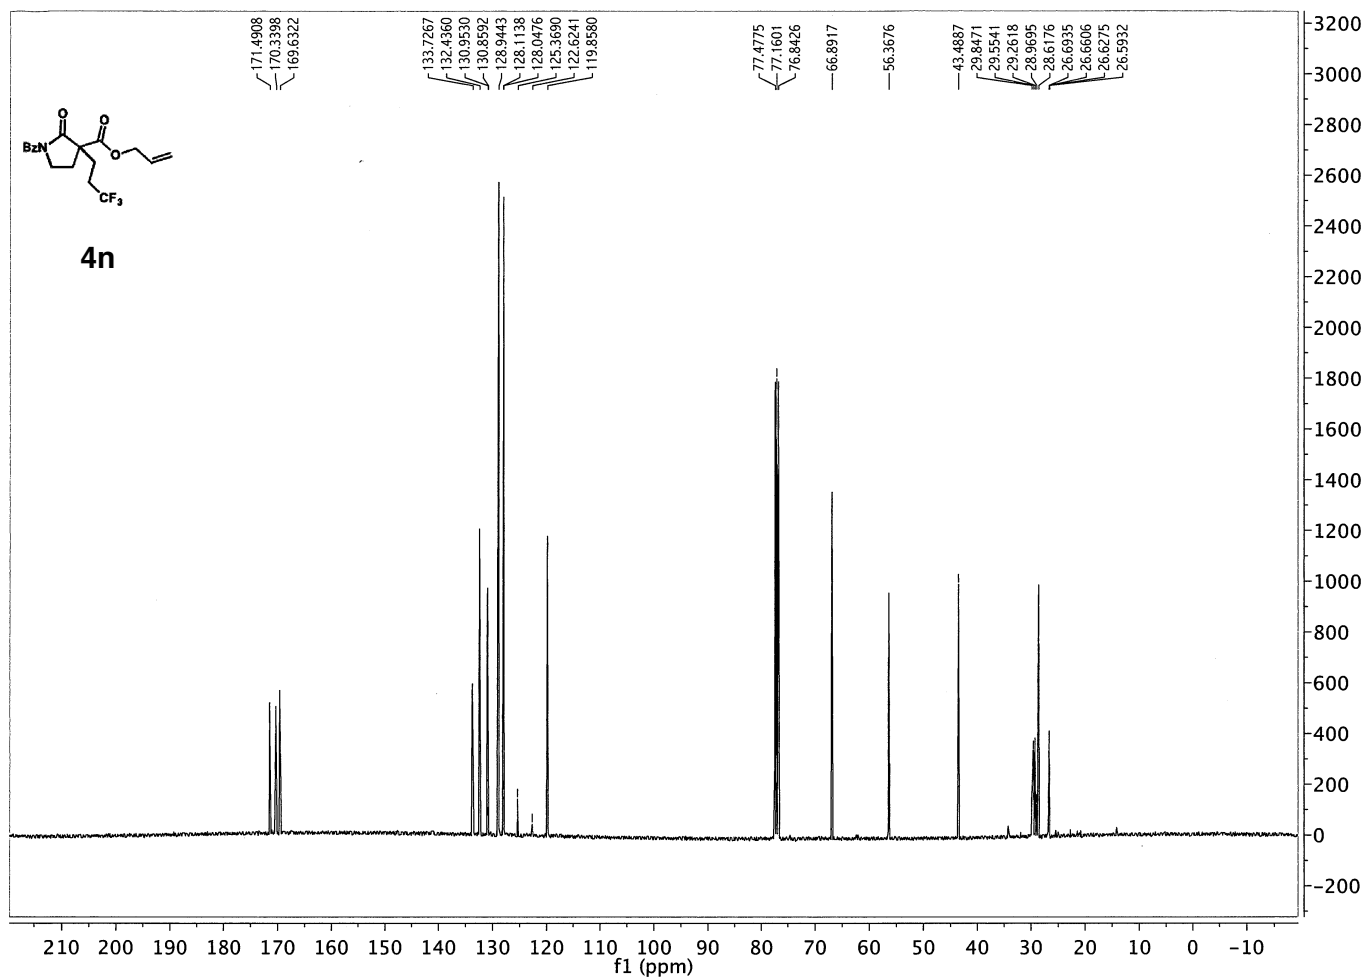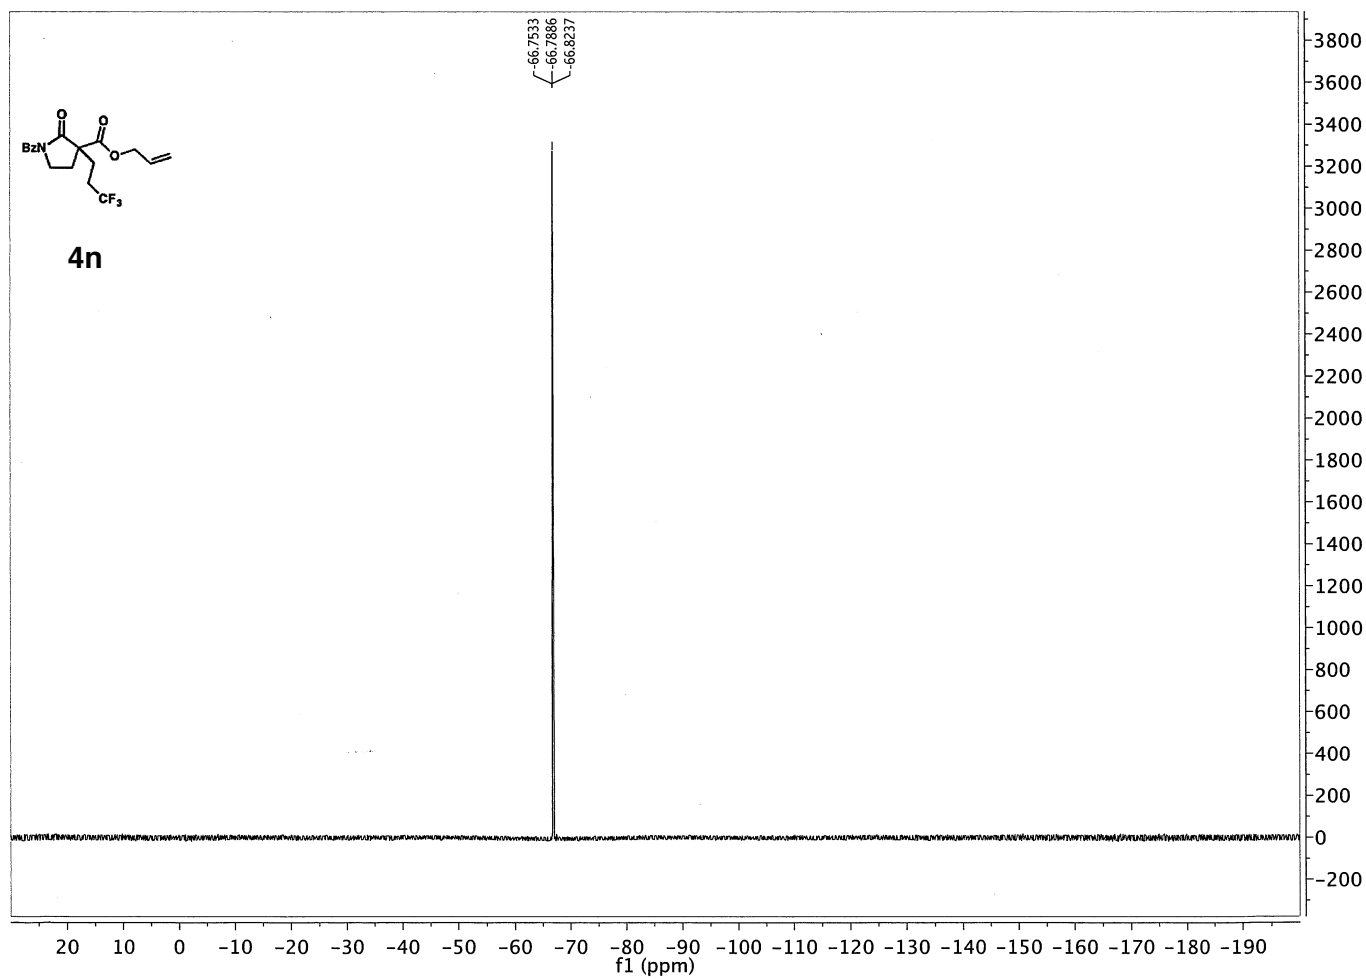

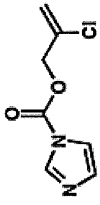

S2

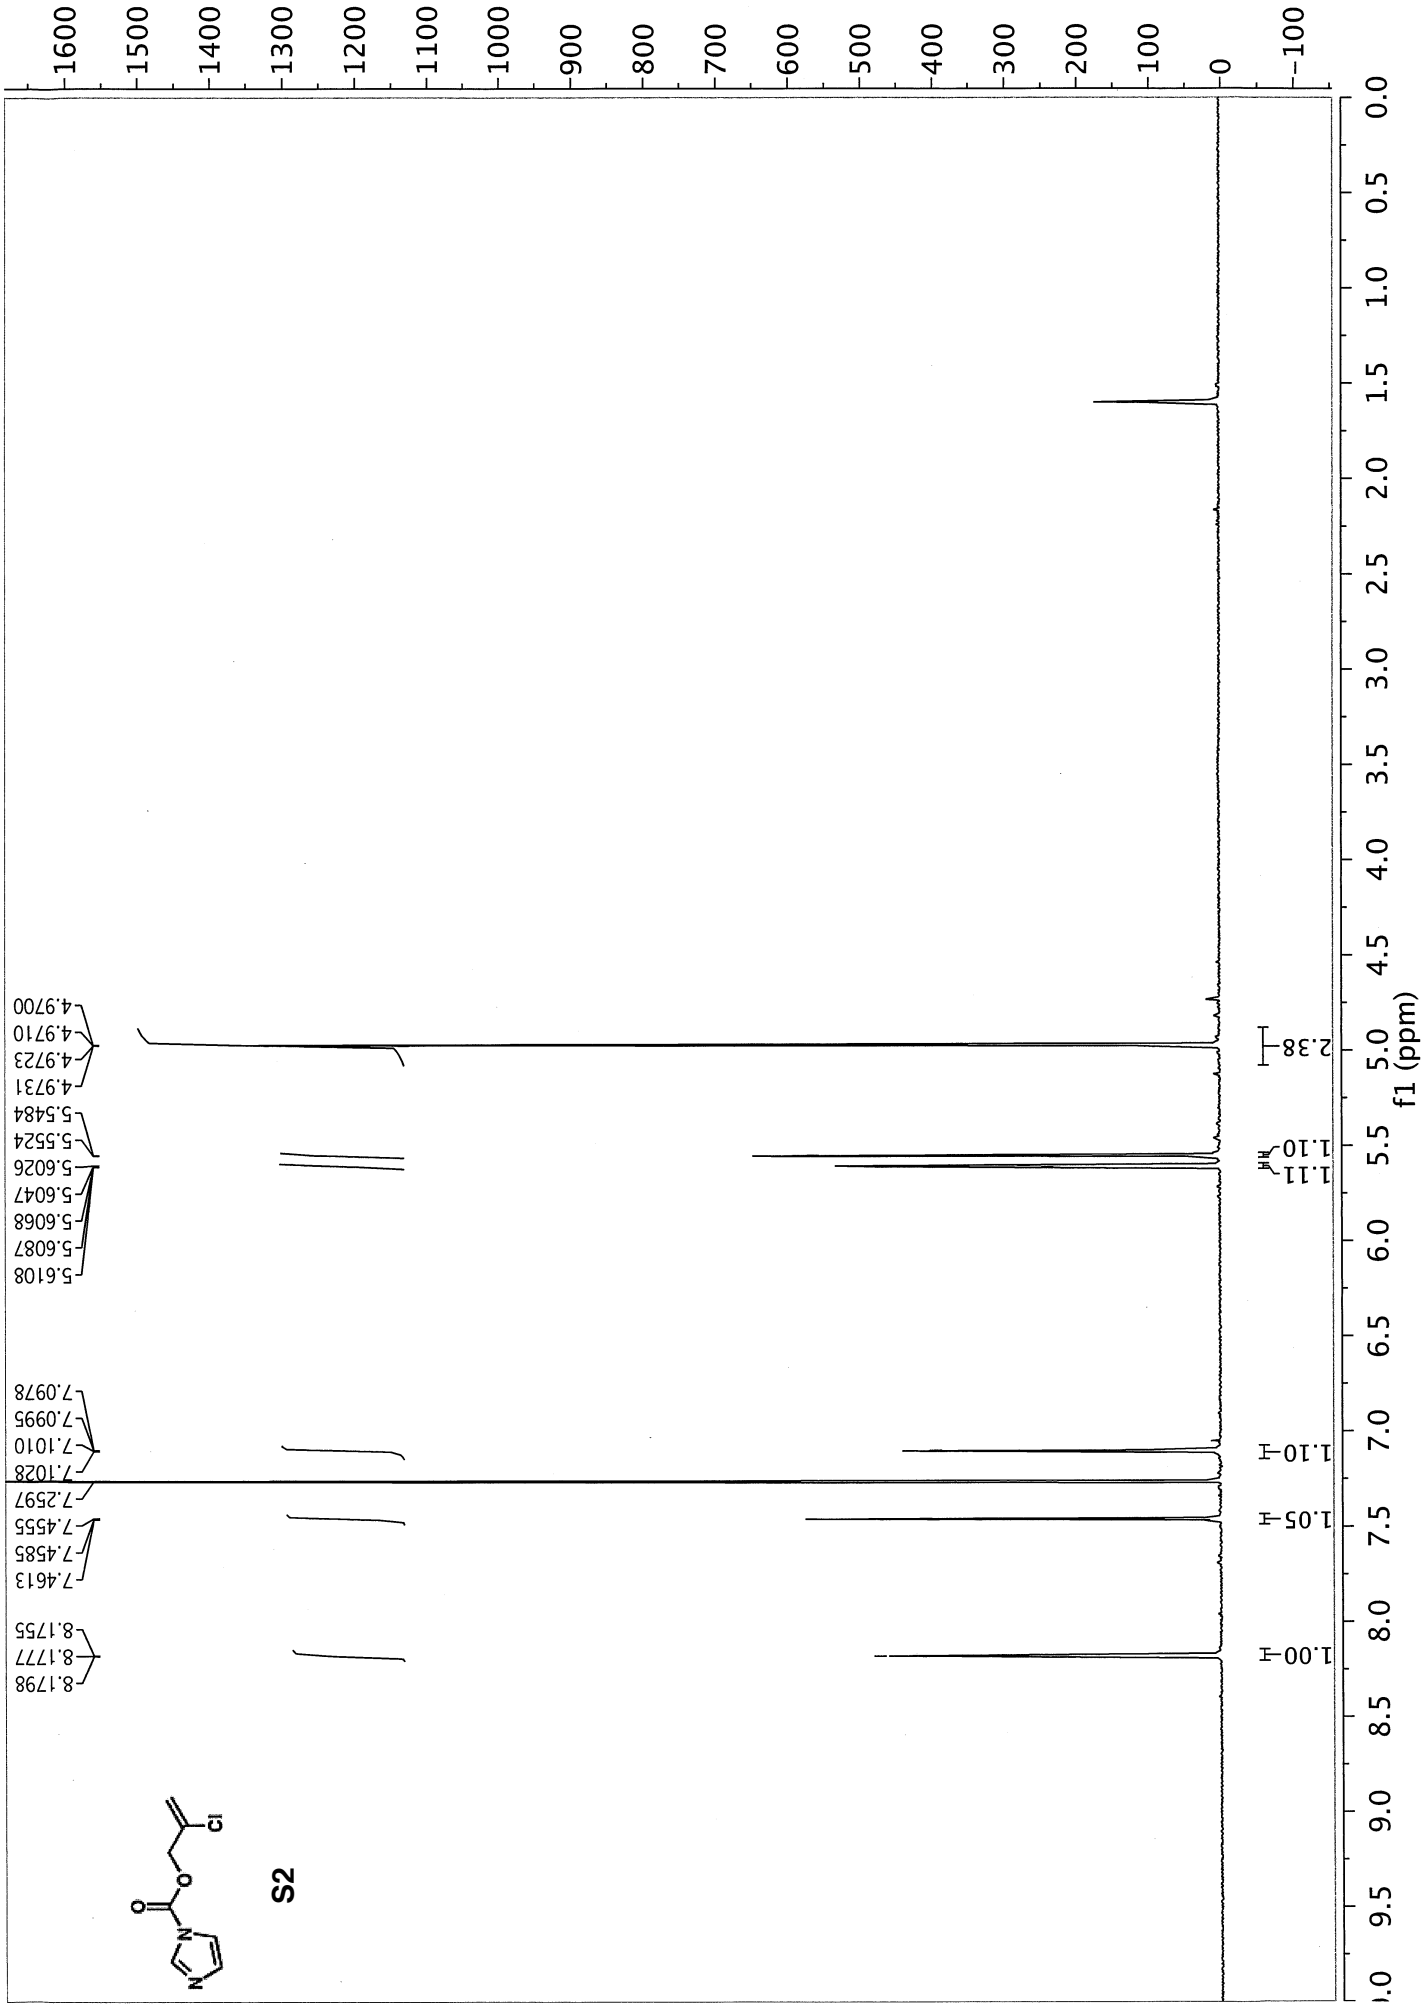

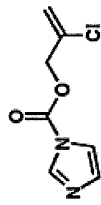

S2

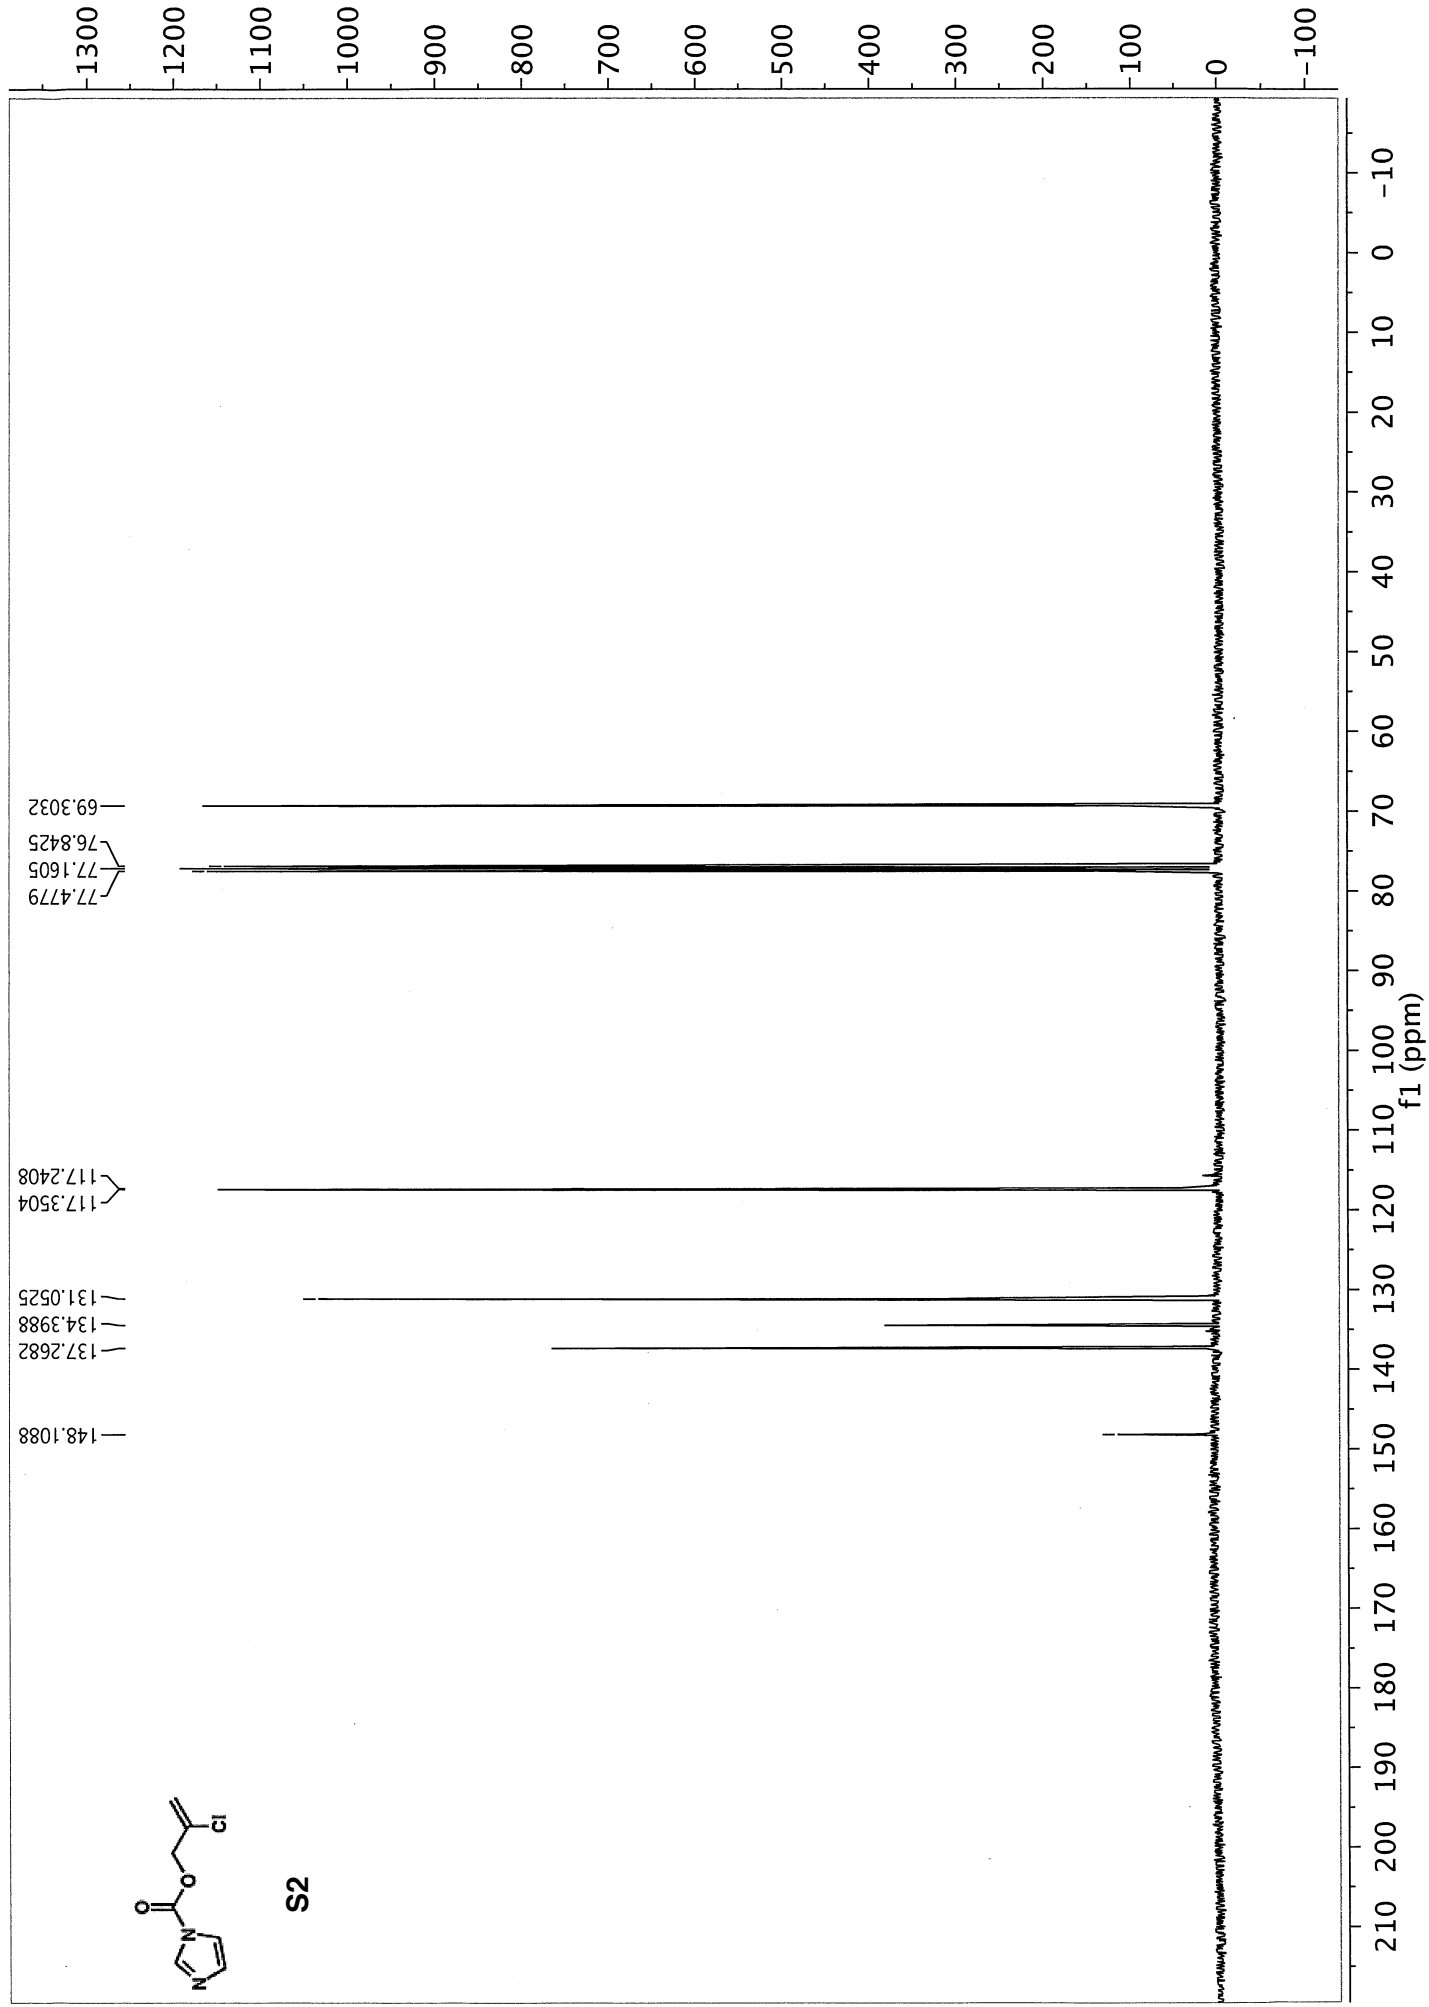

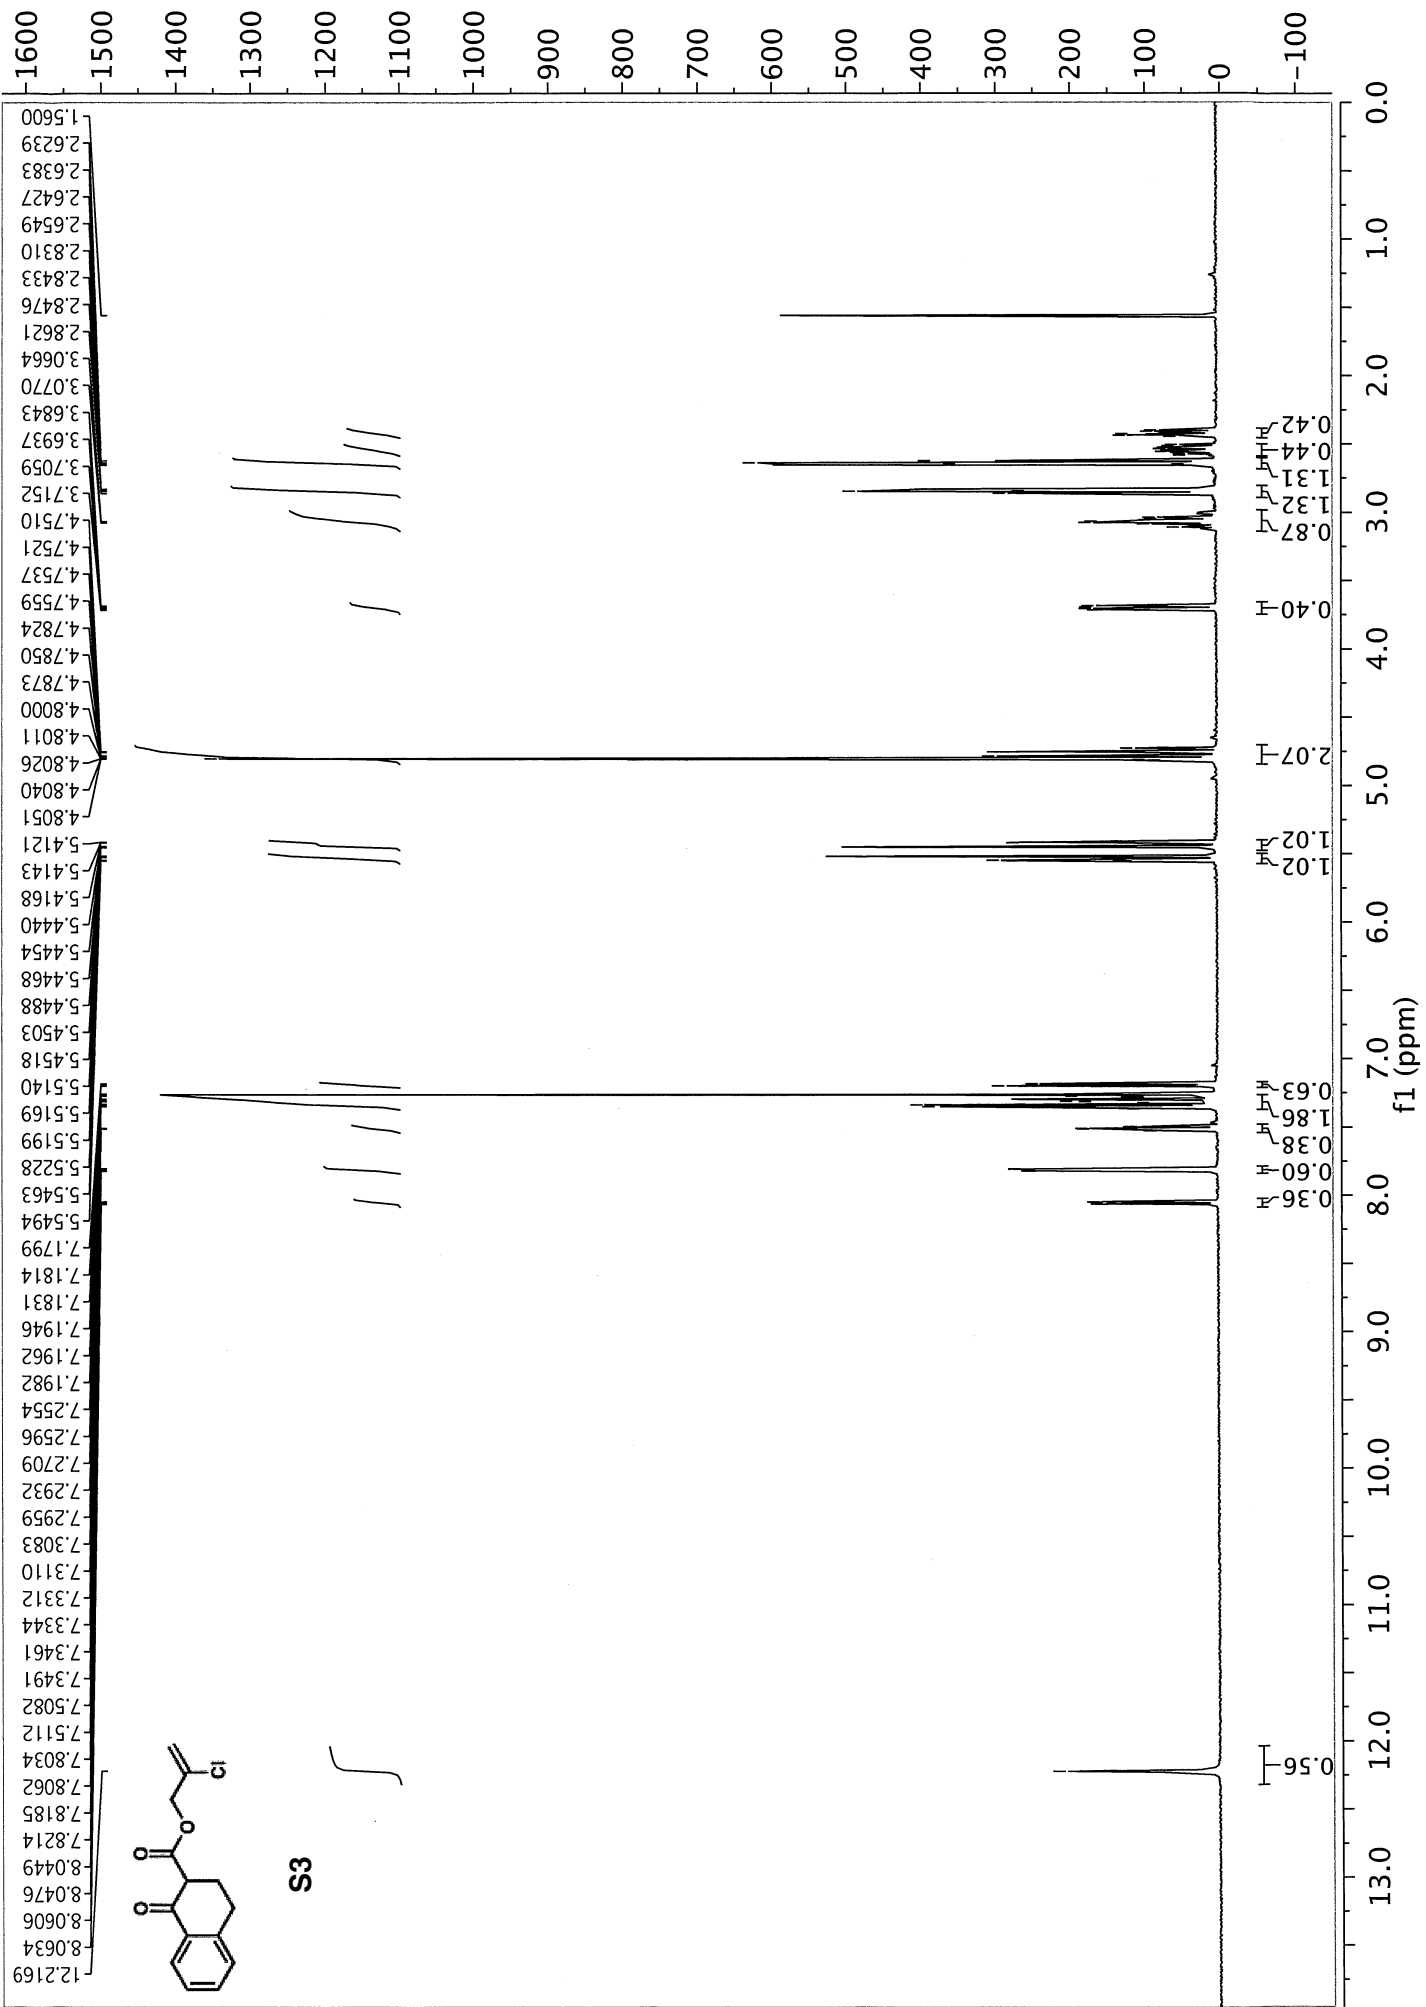

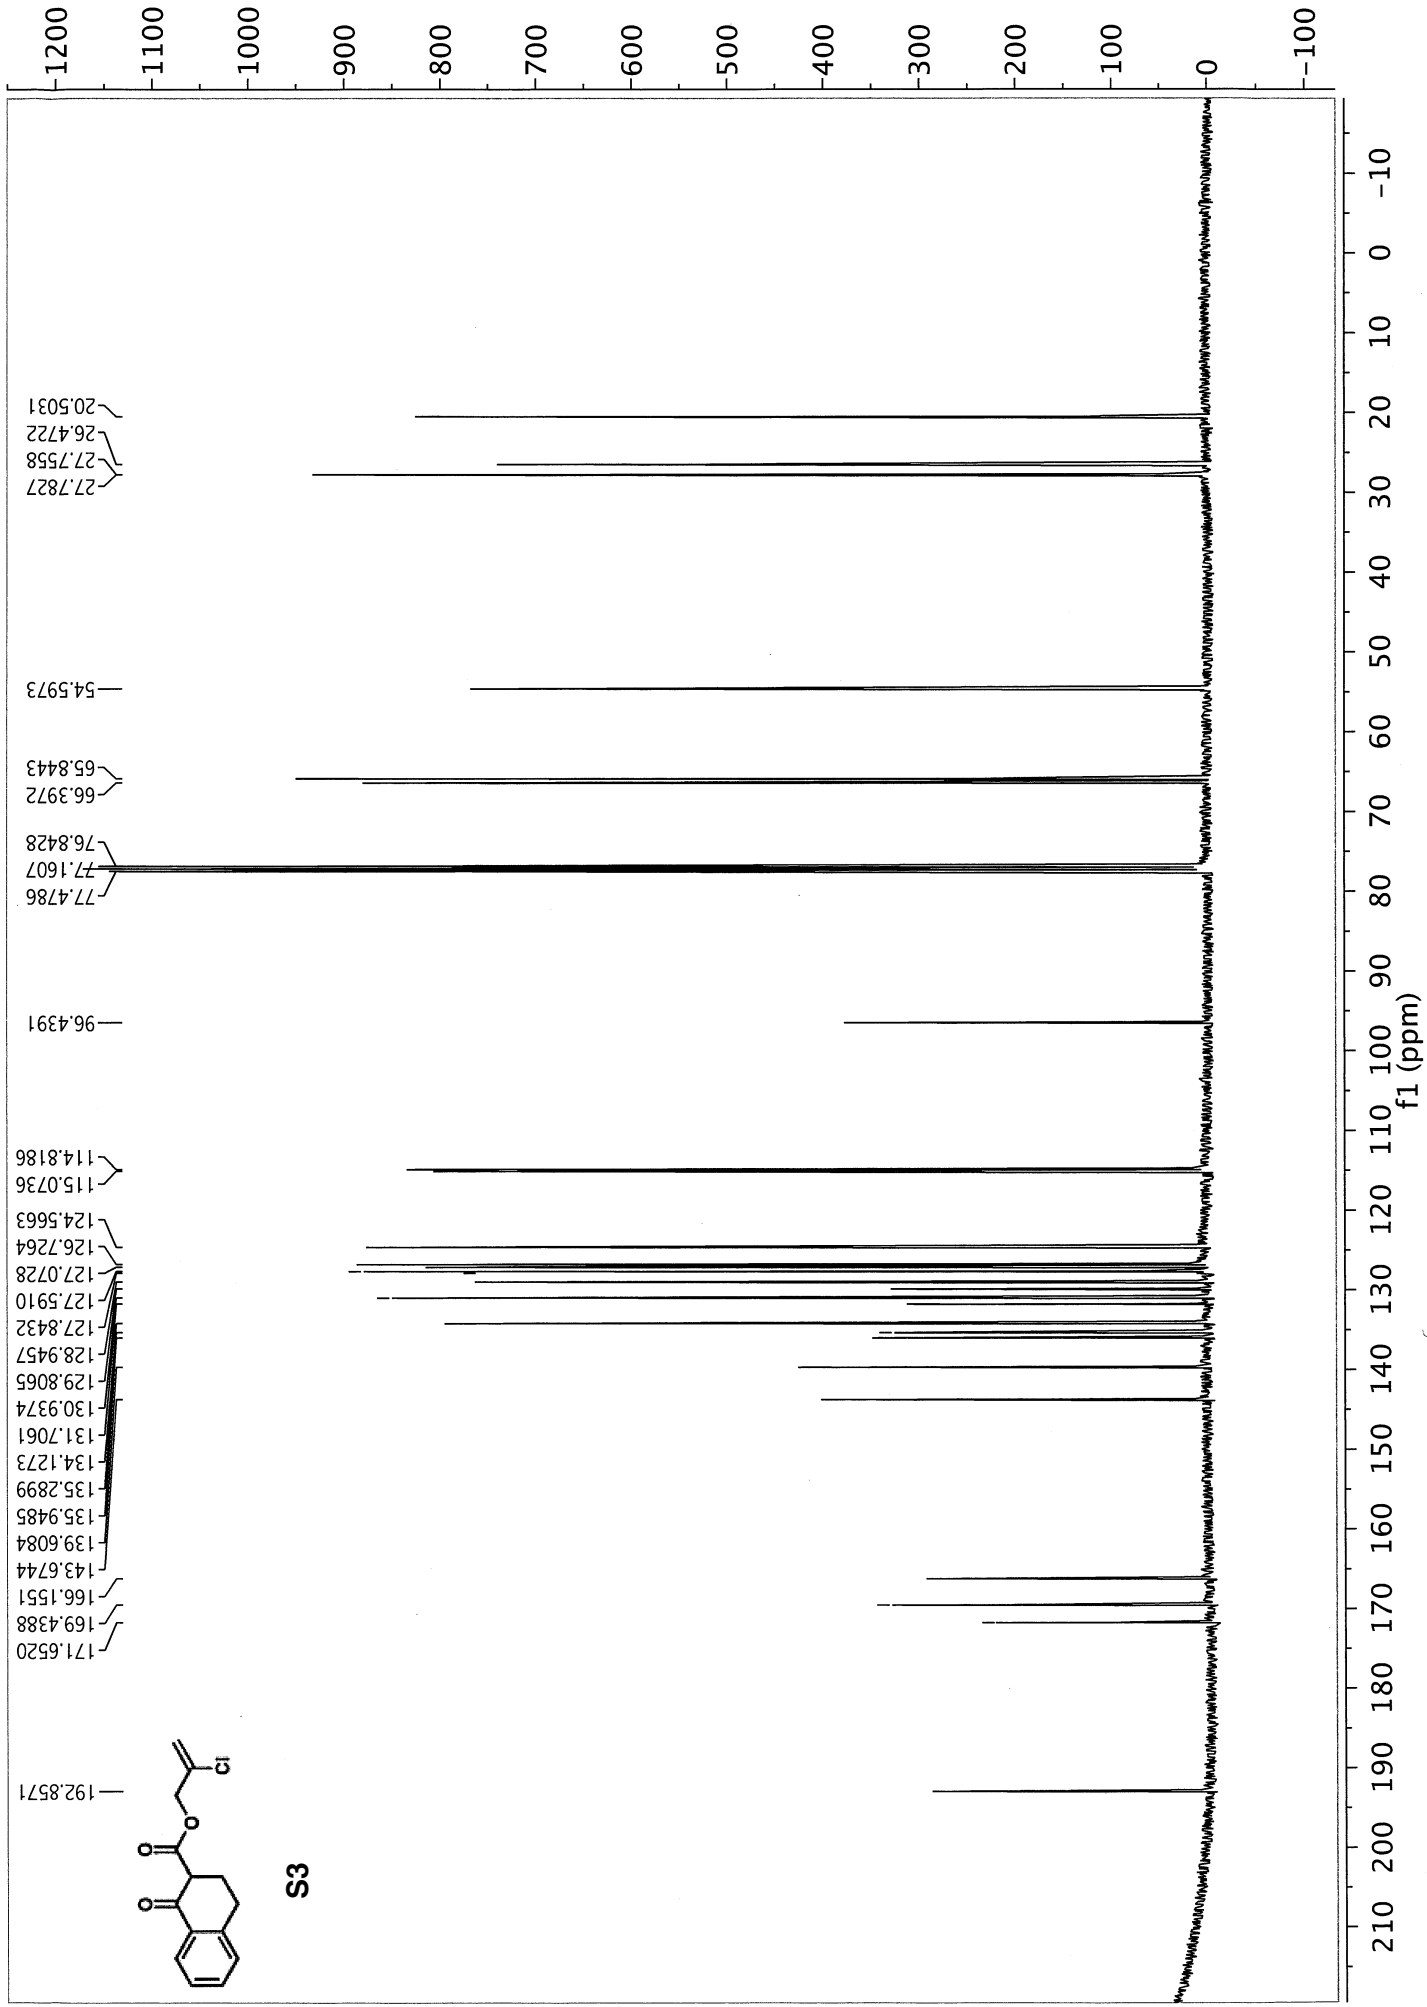

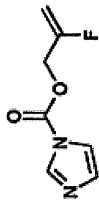

S4

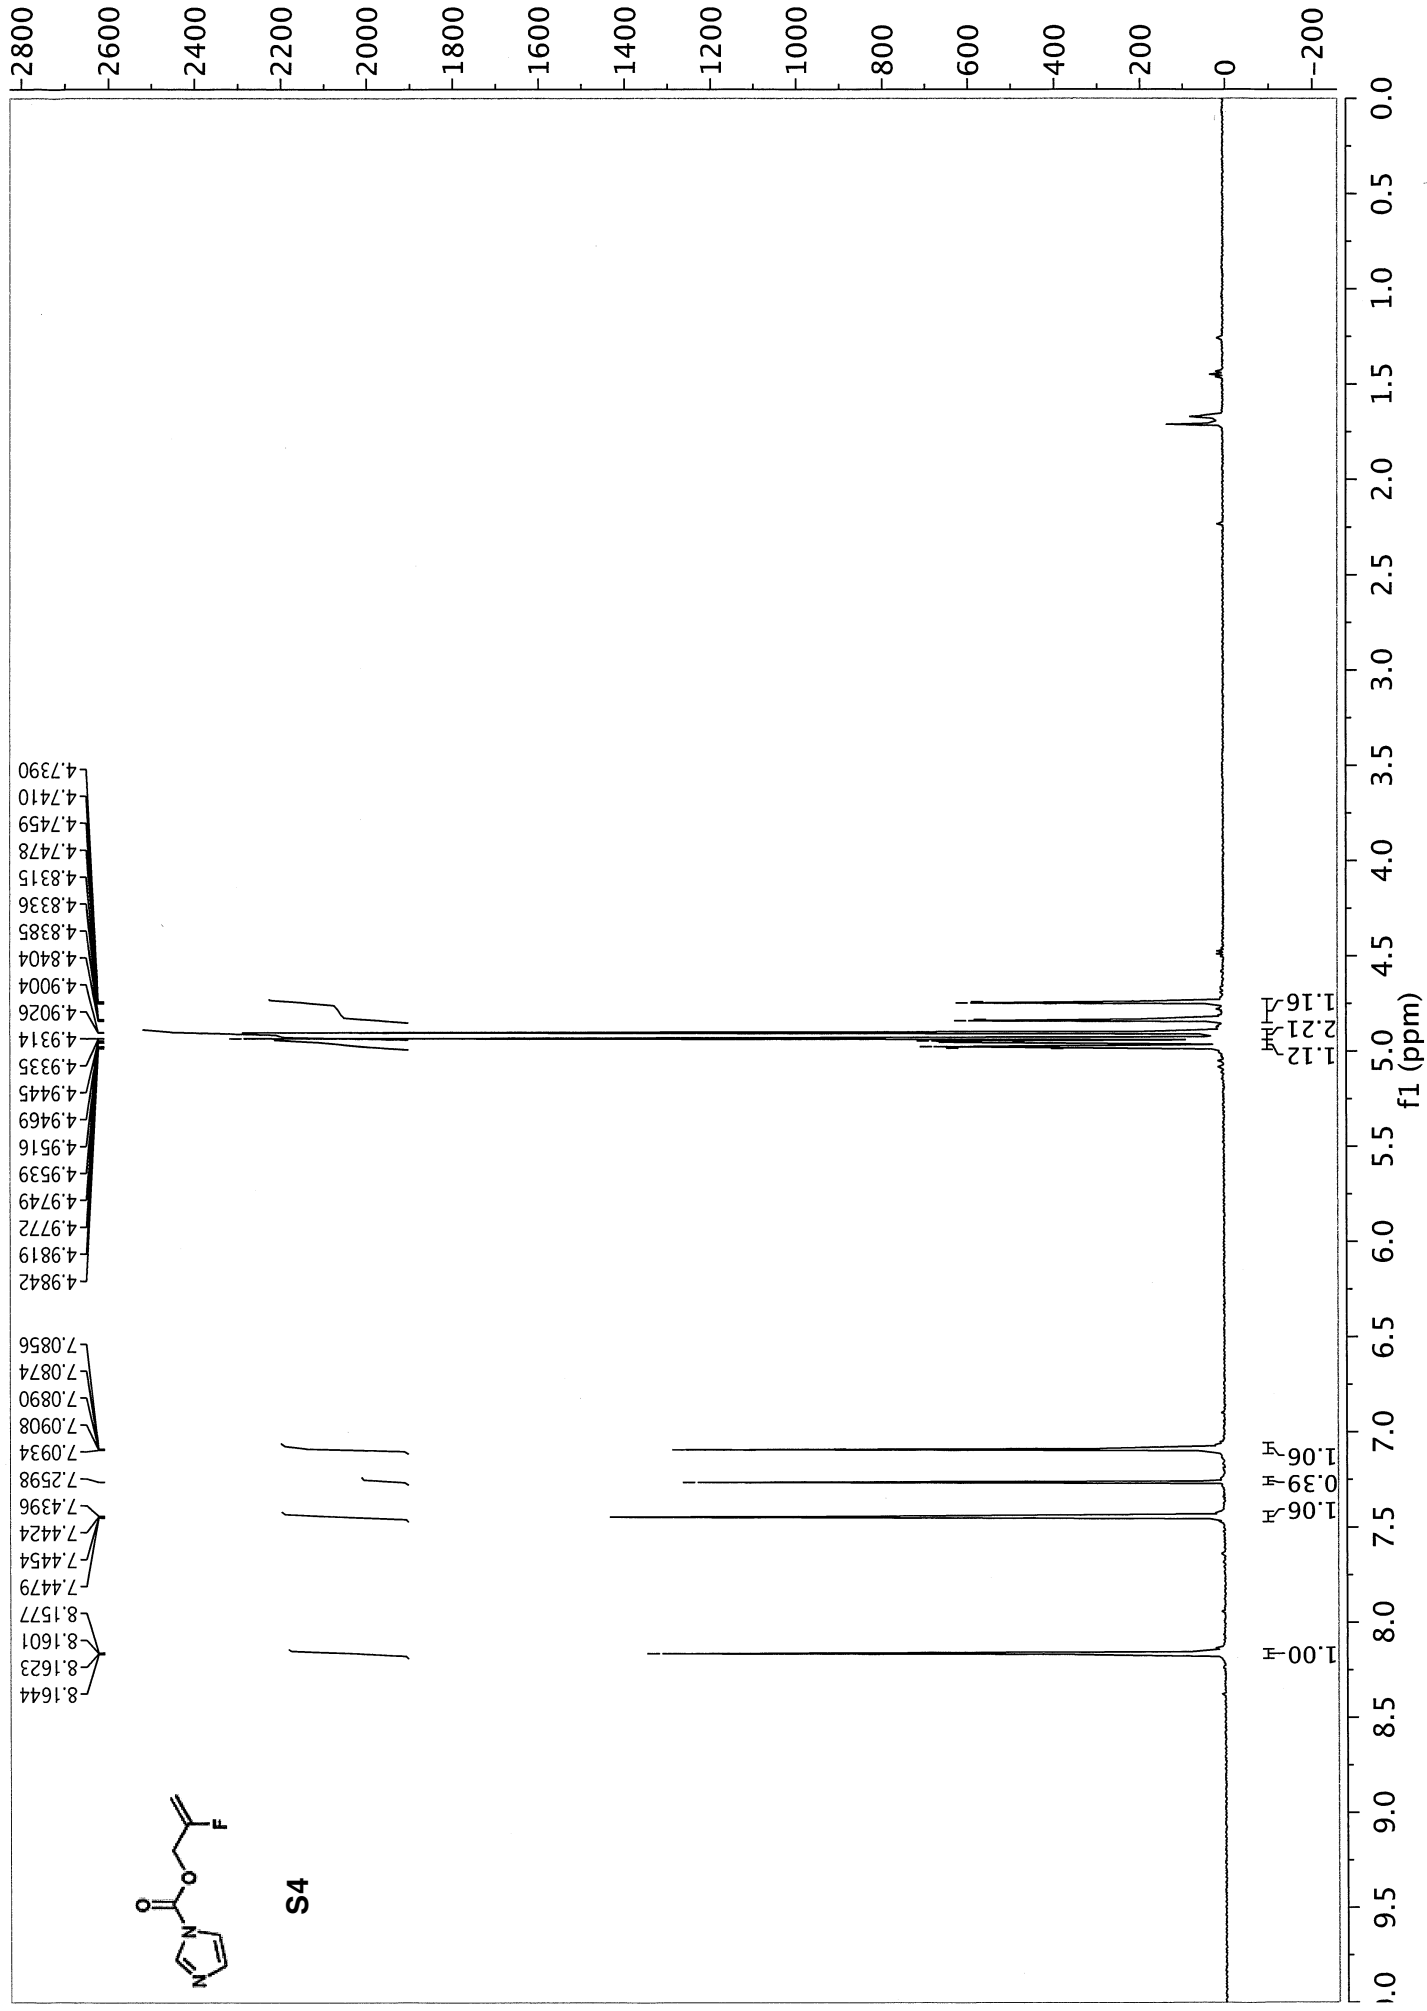

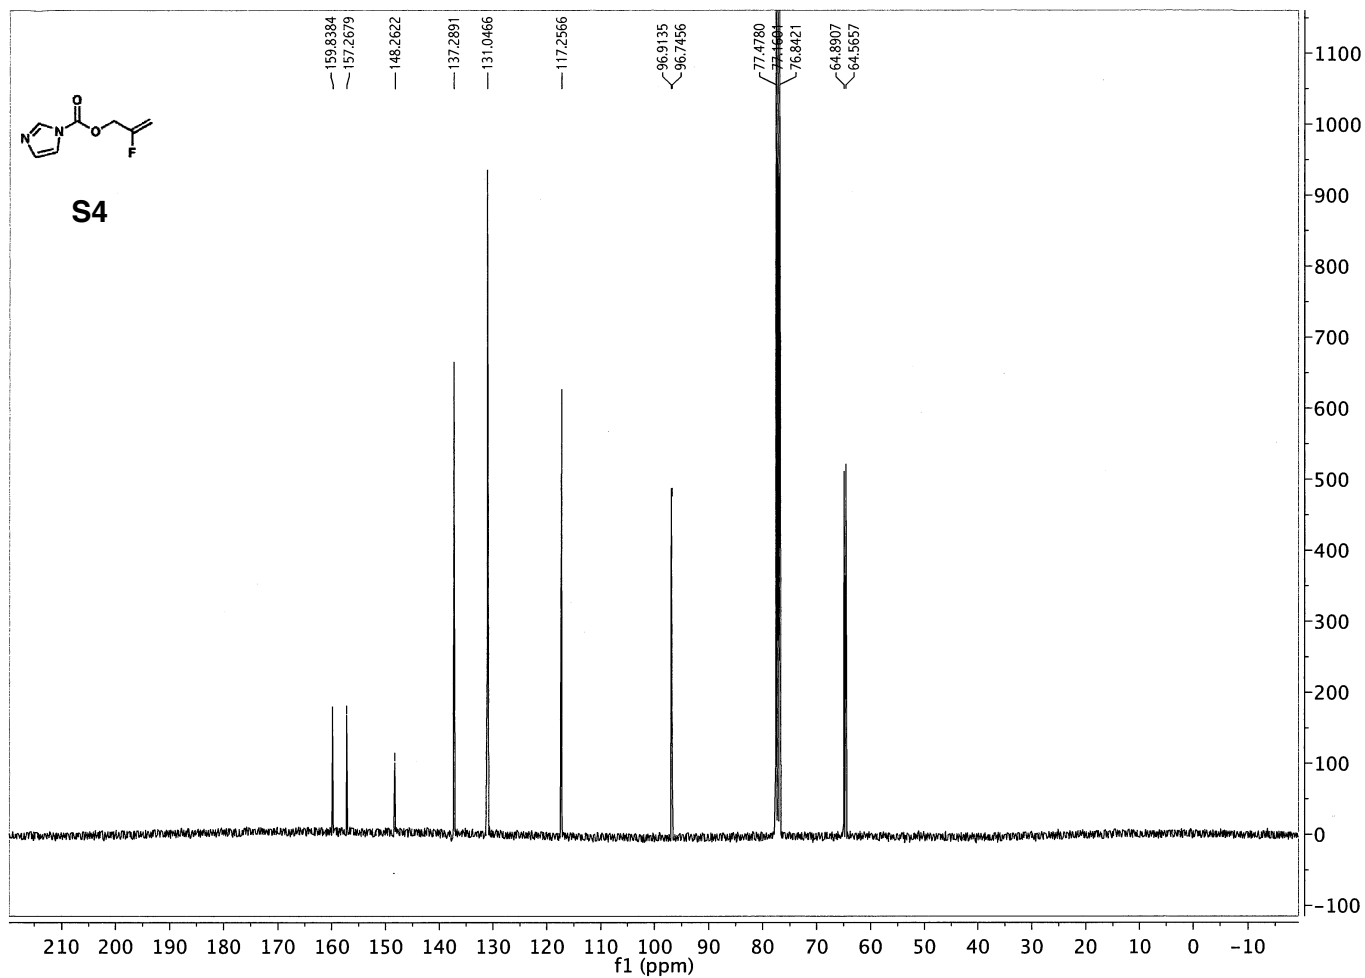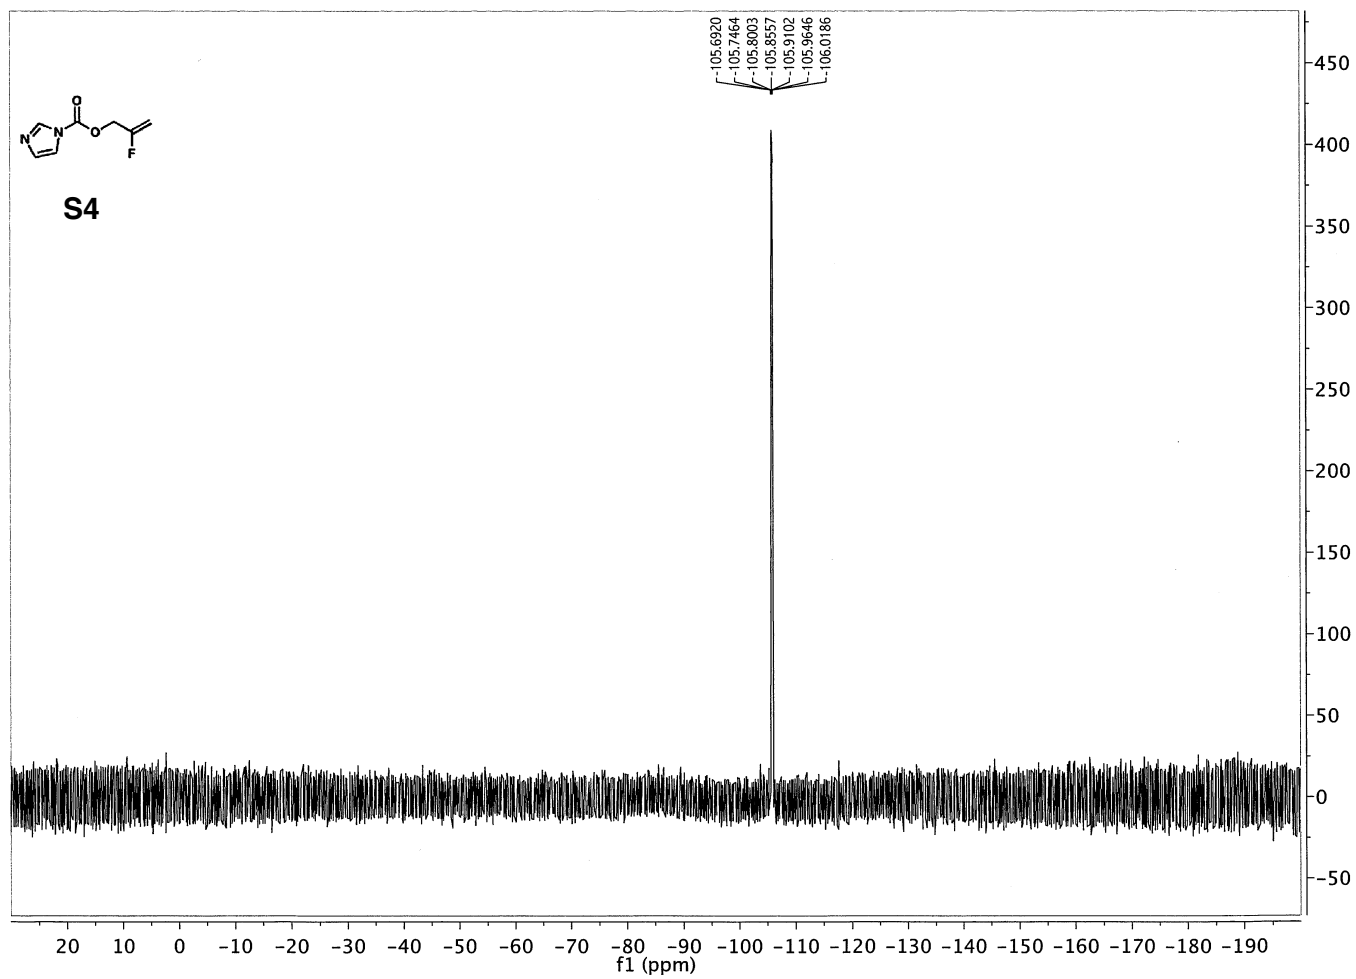

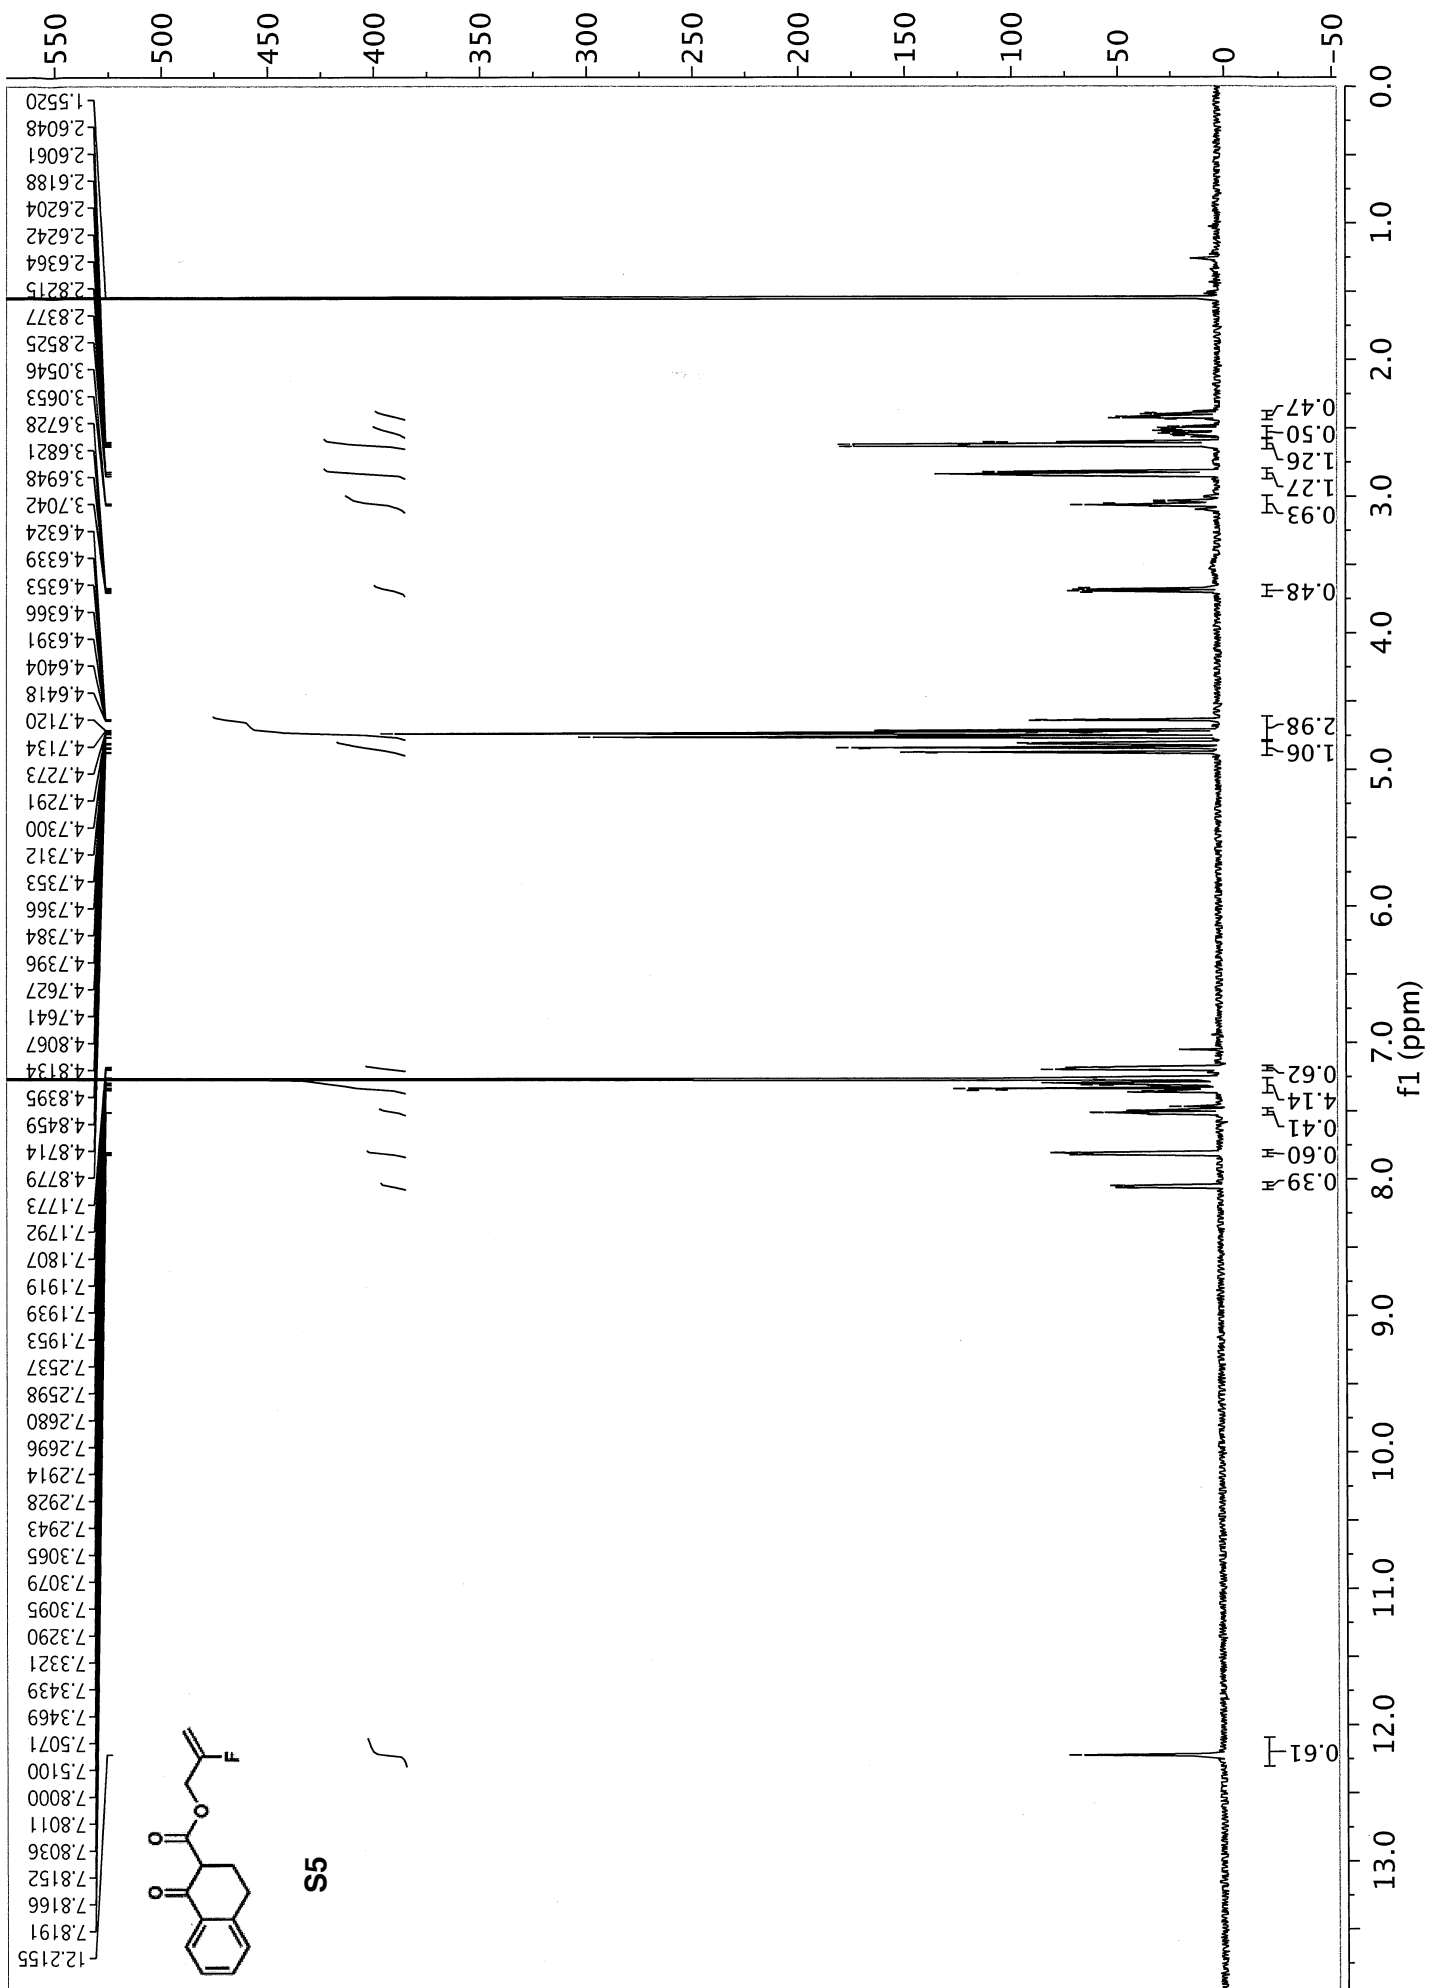

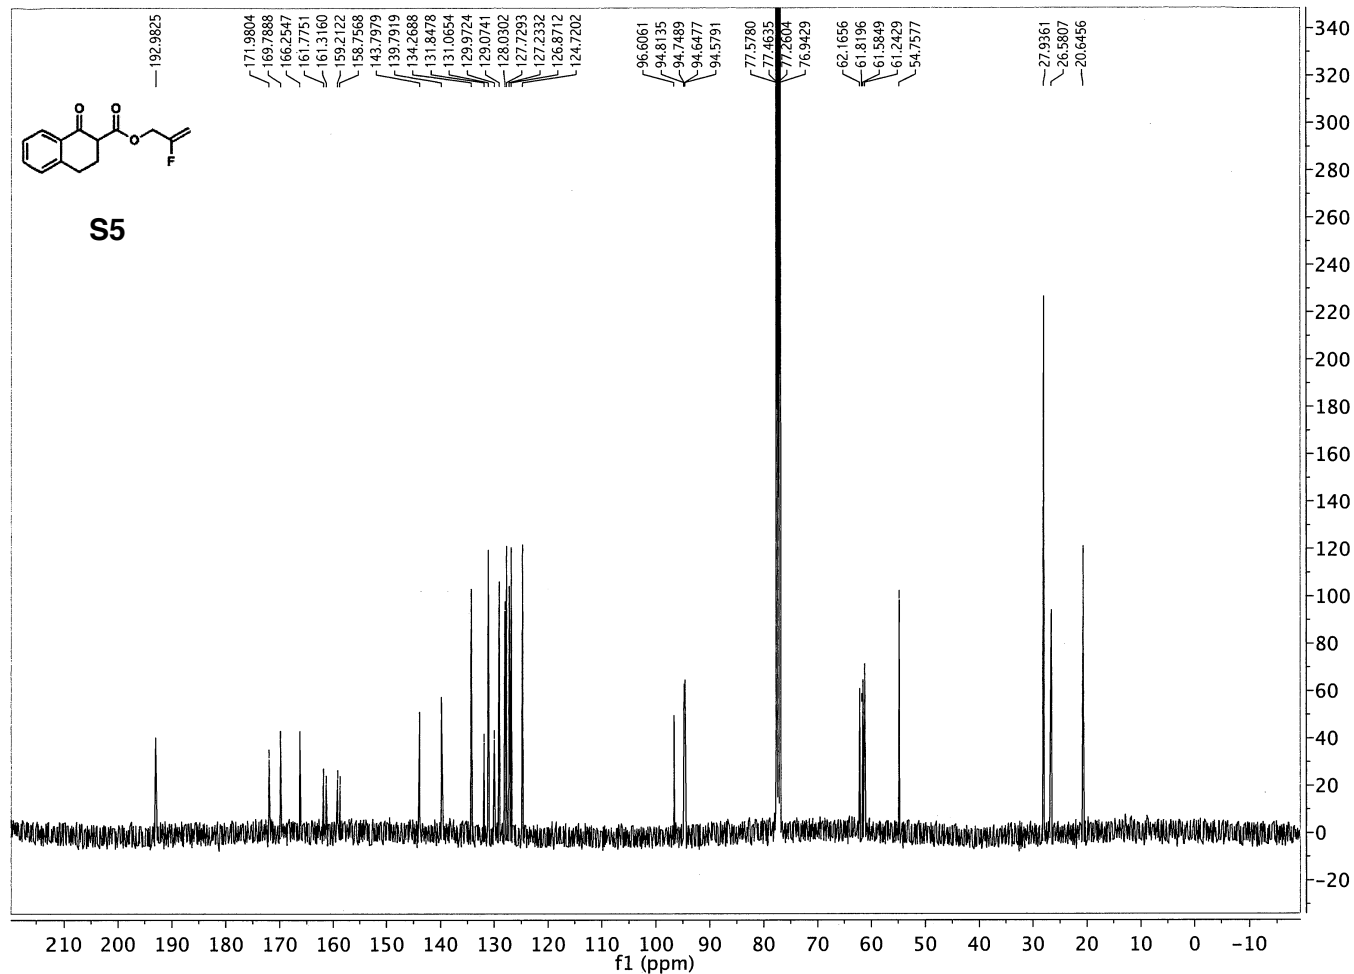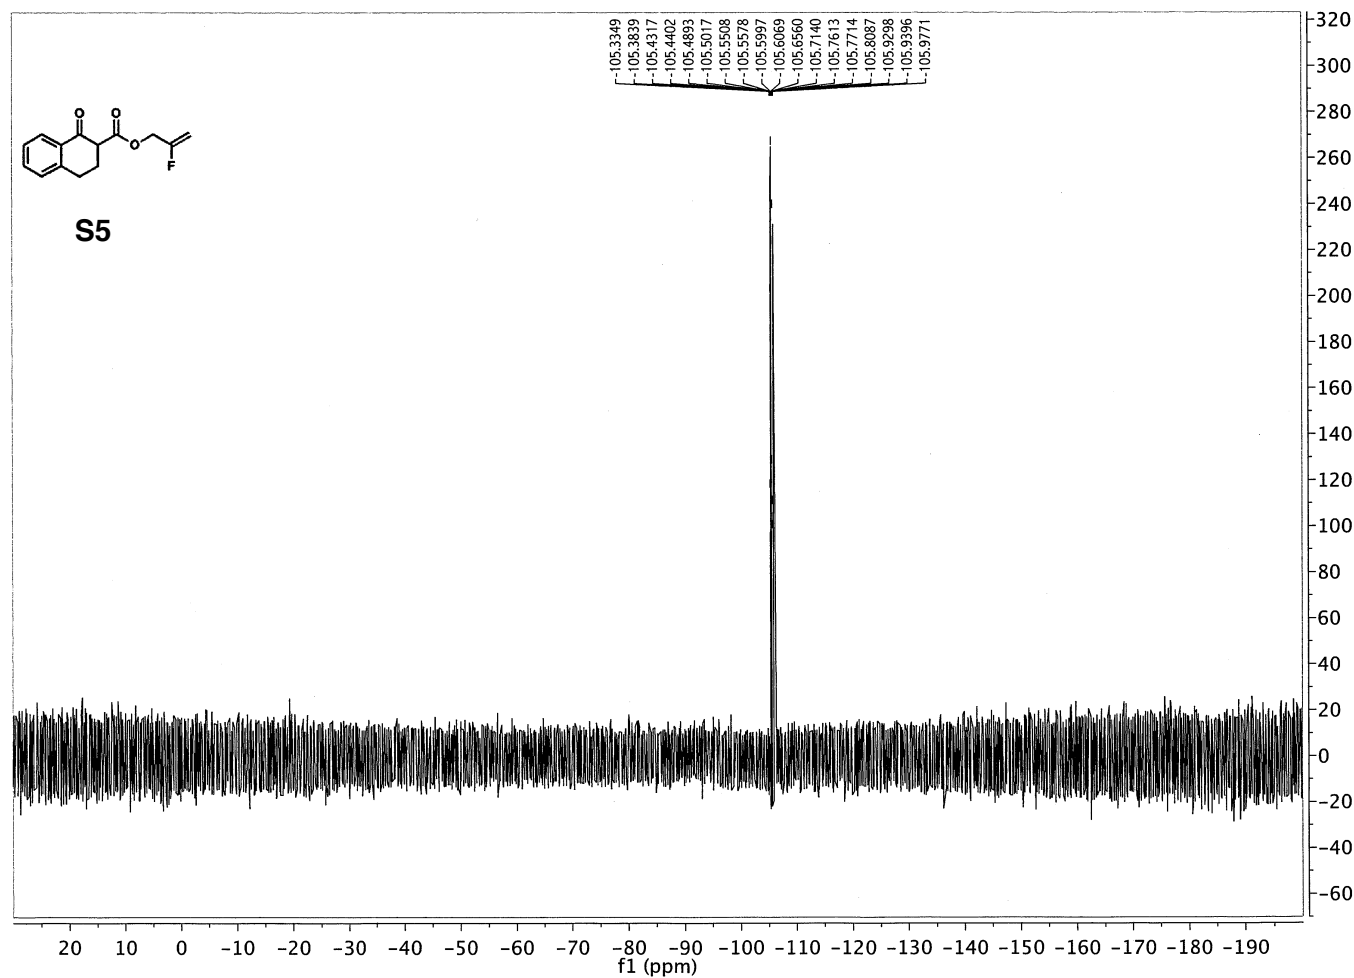

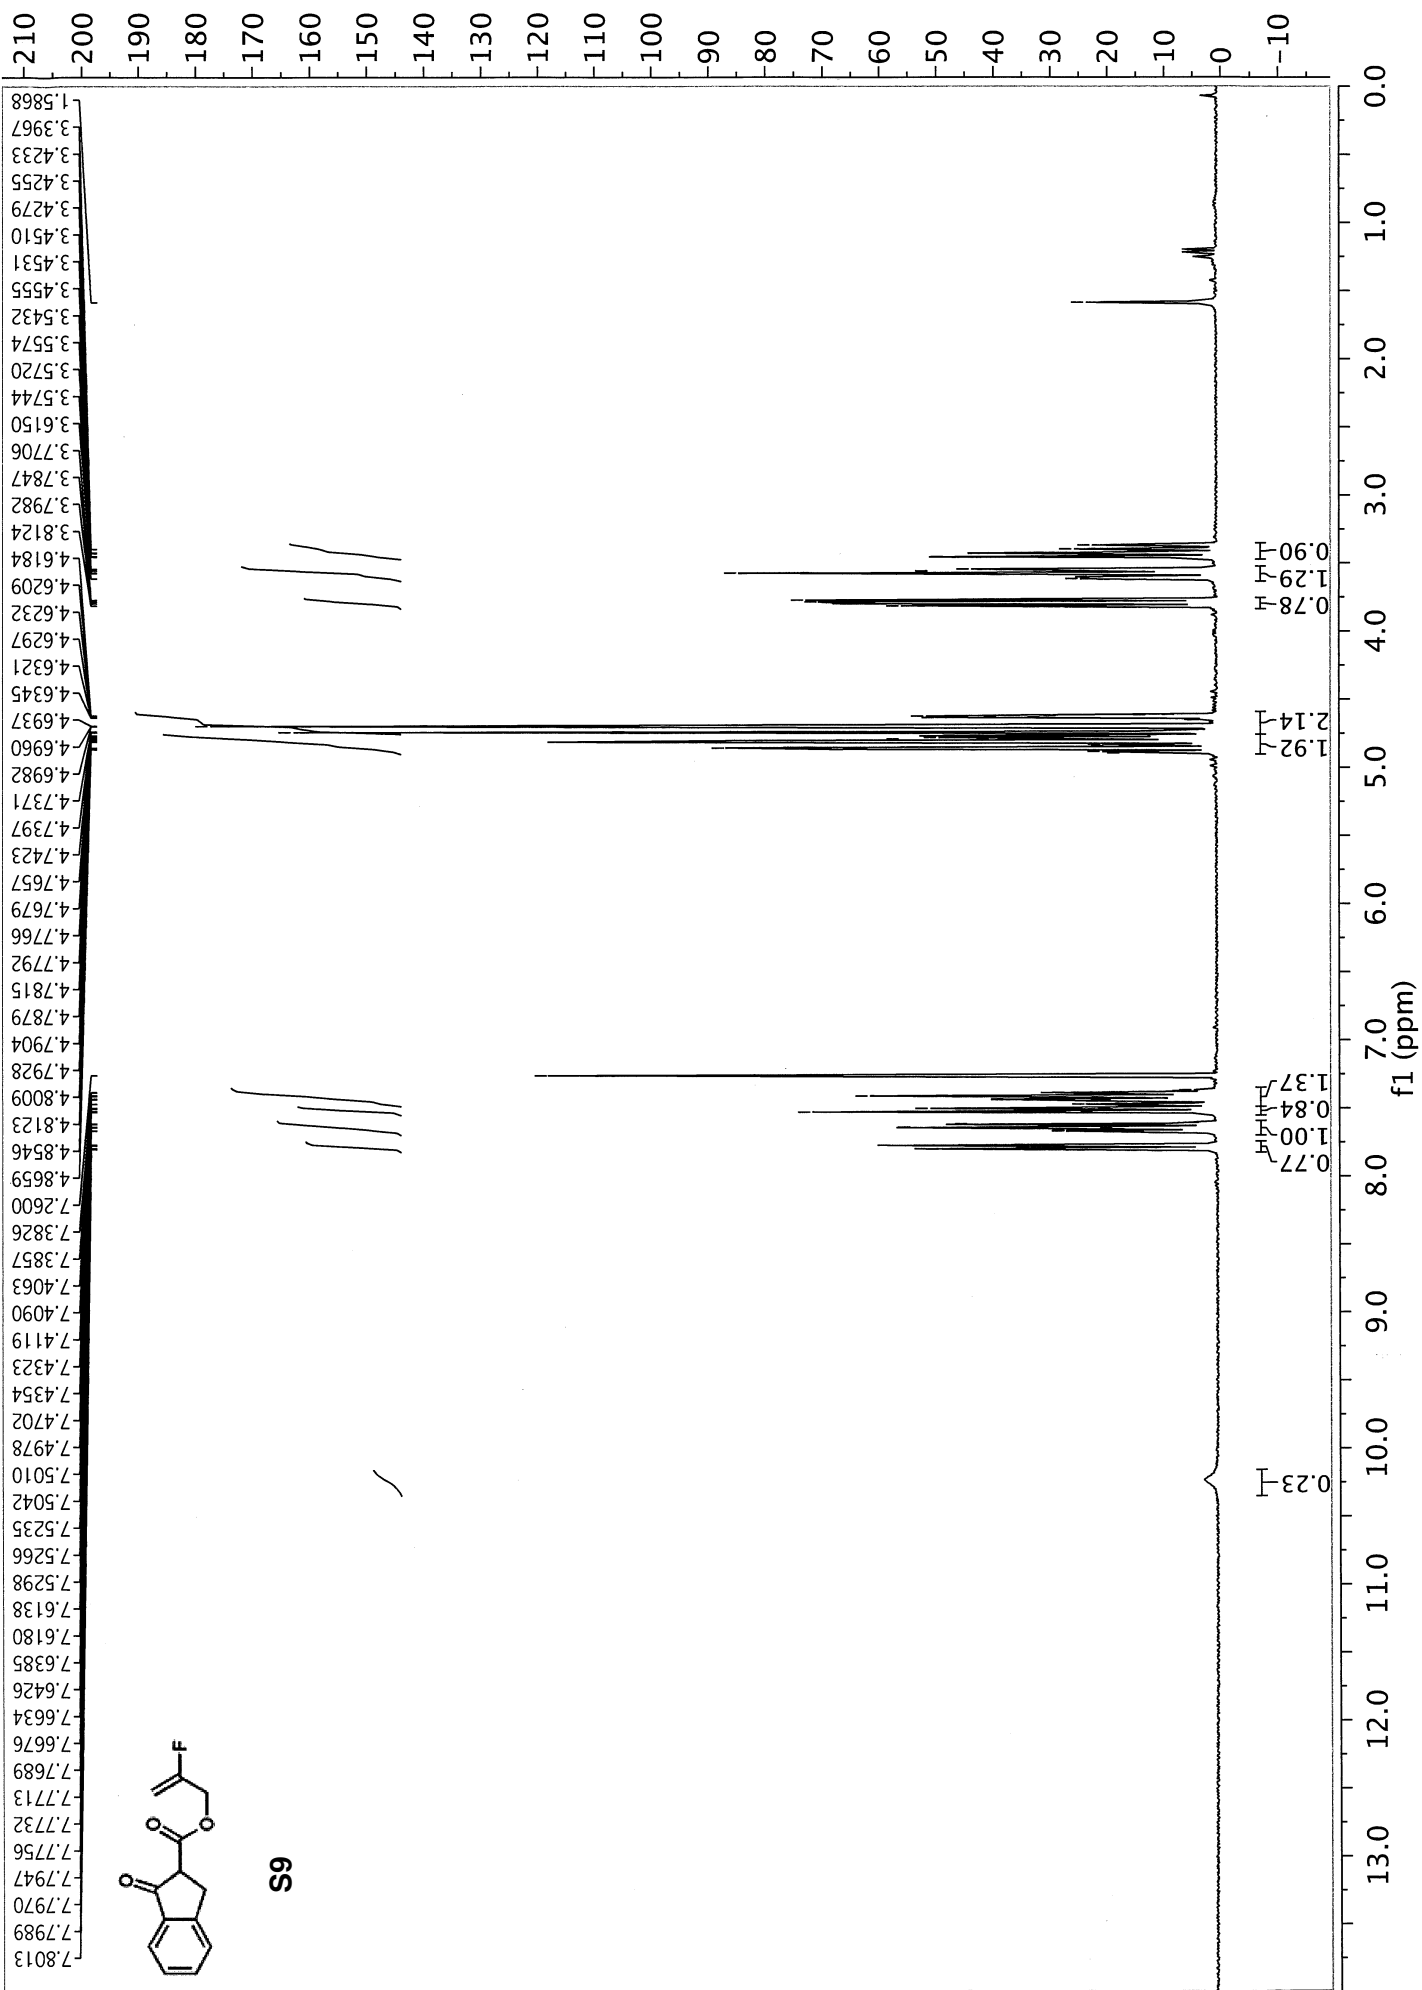

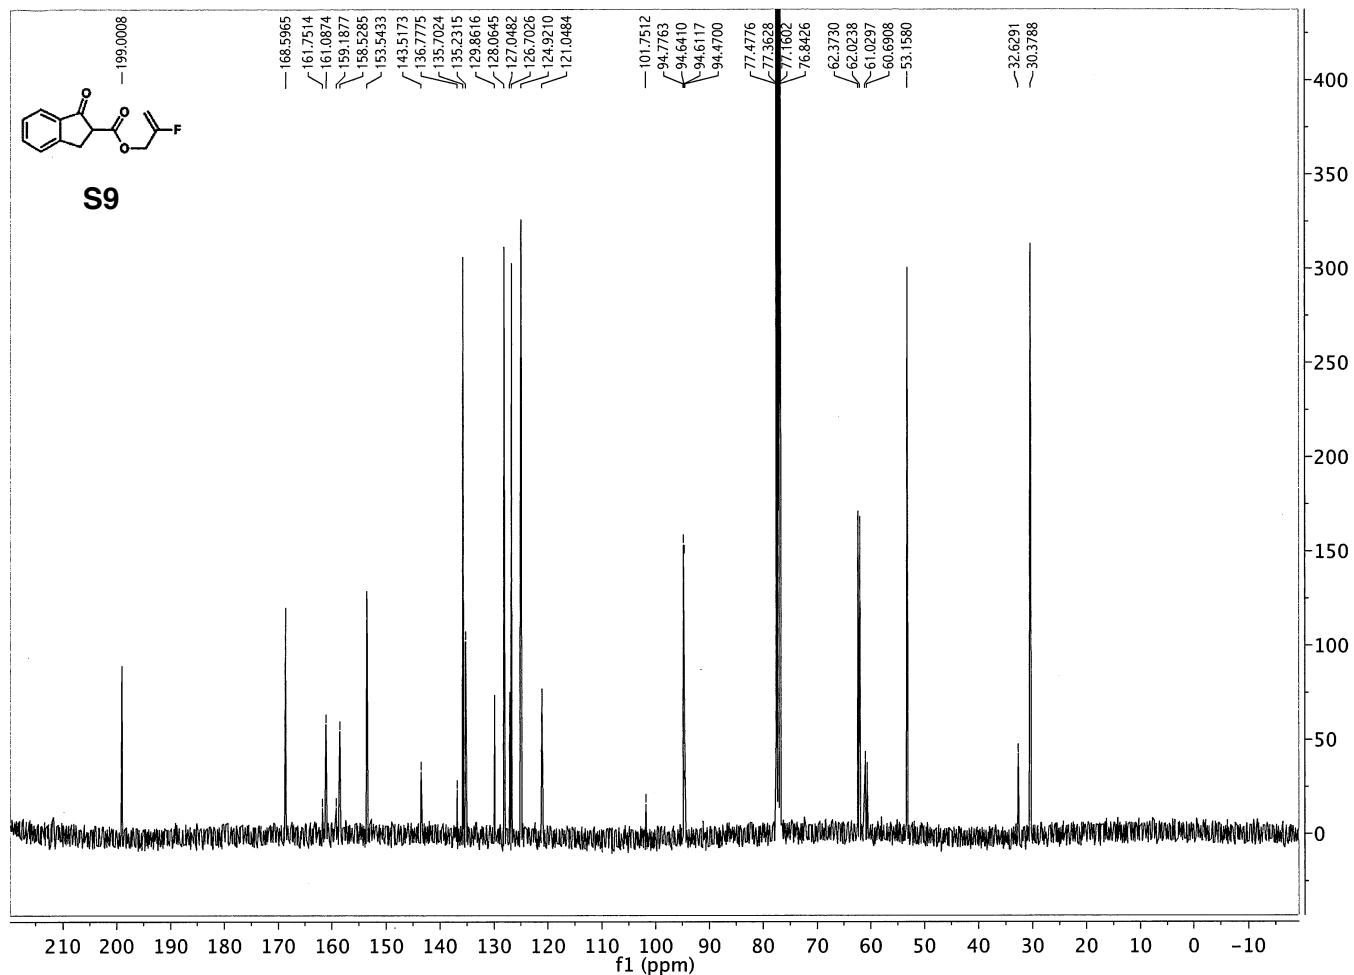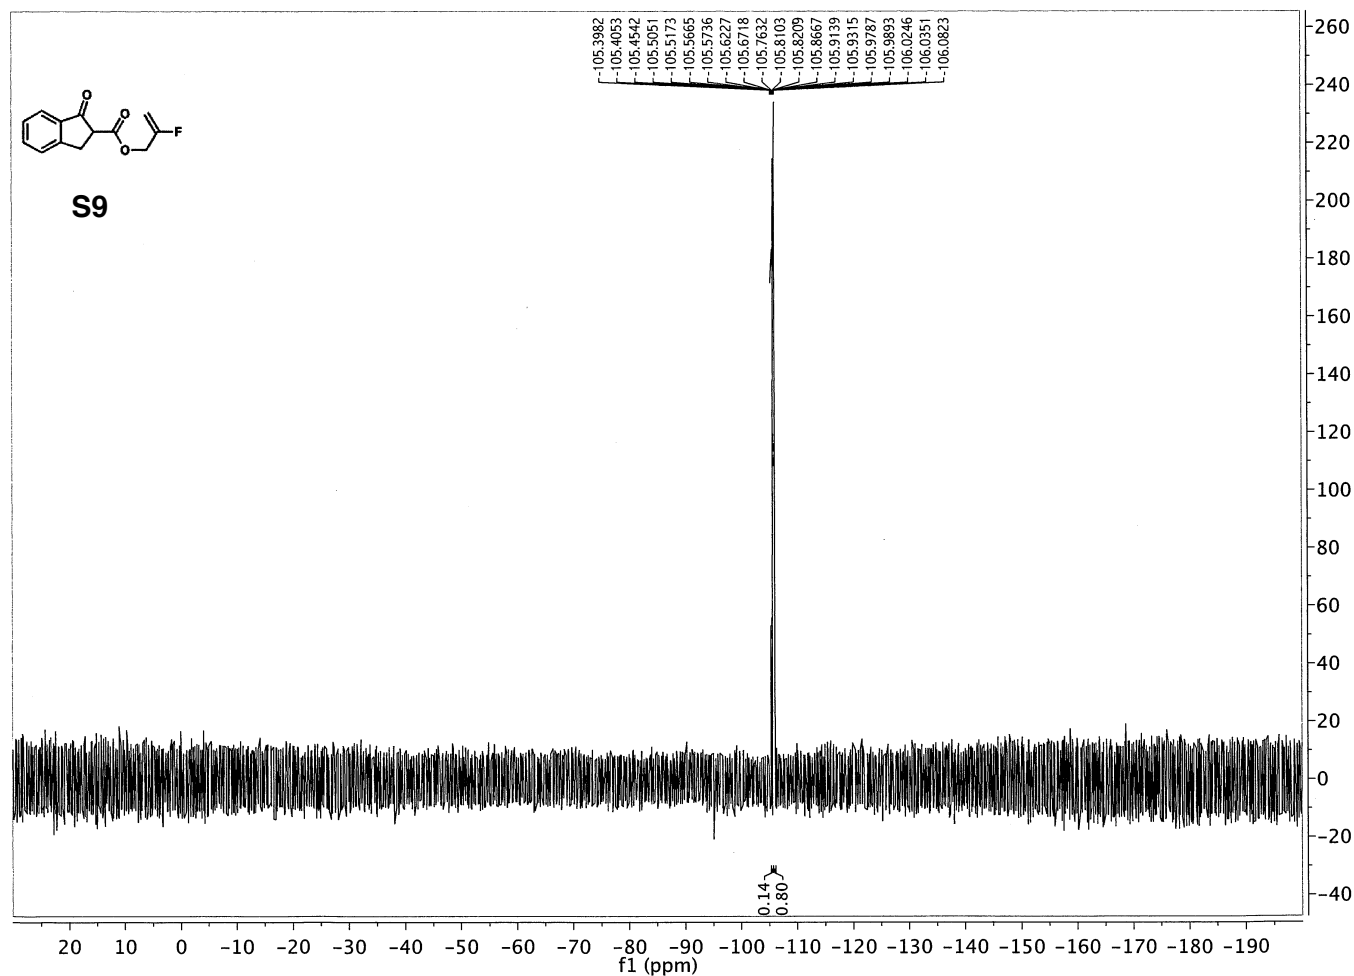

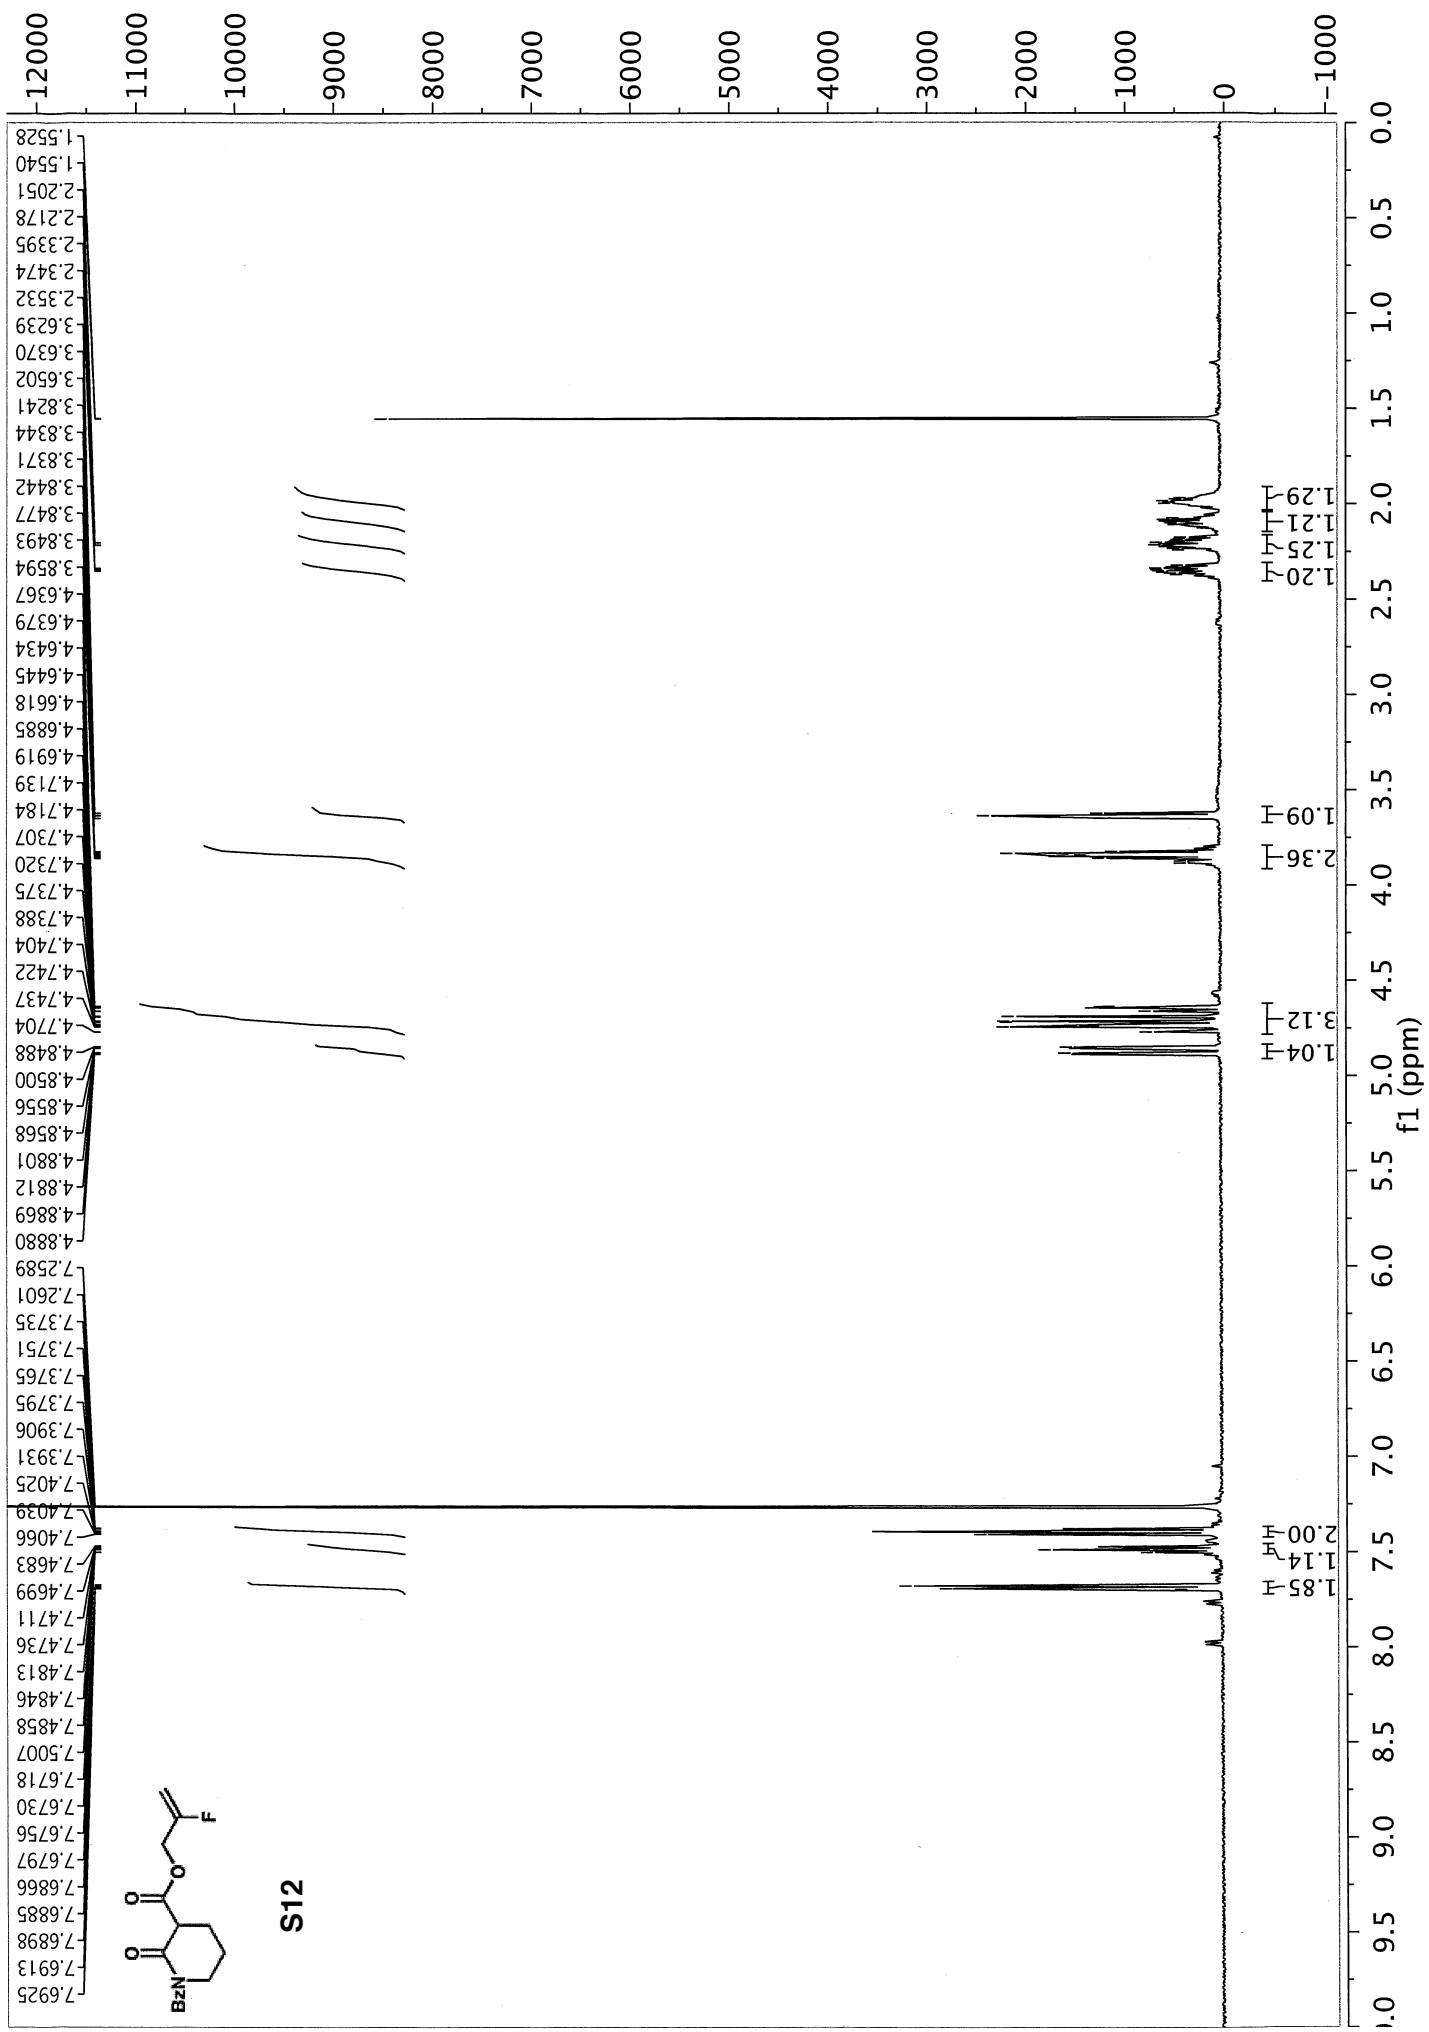

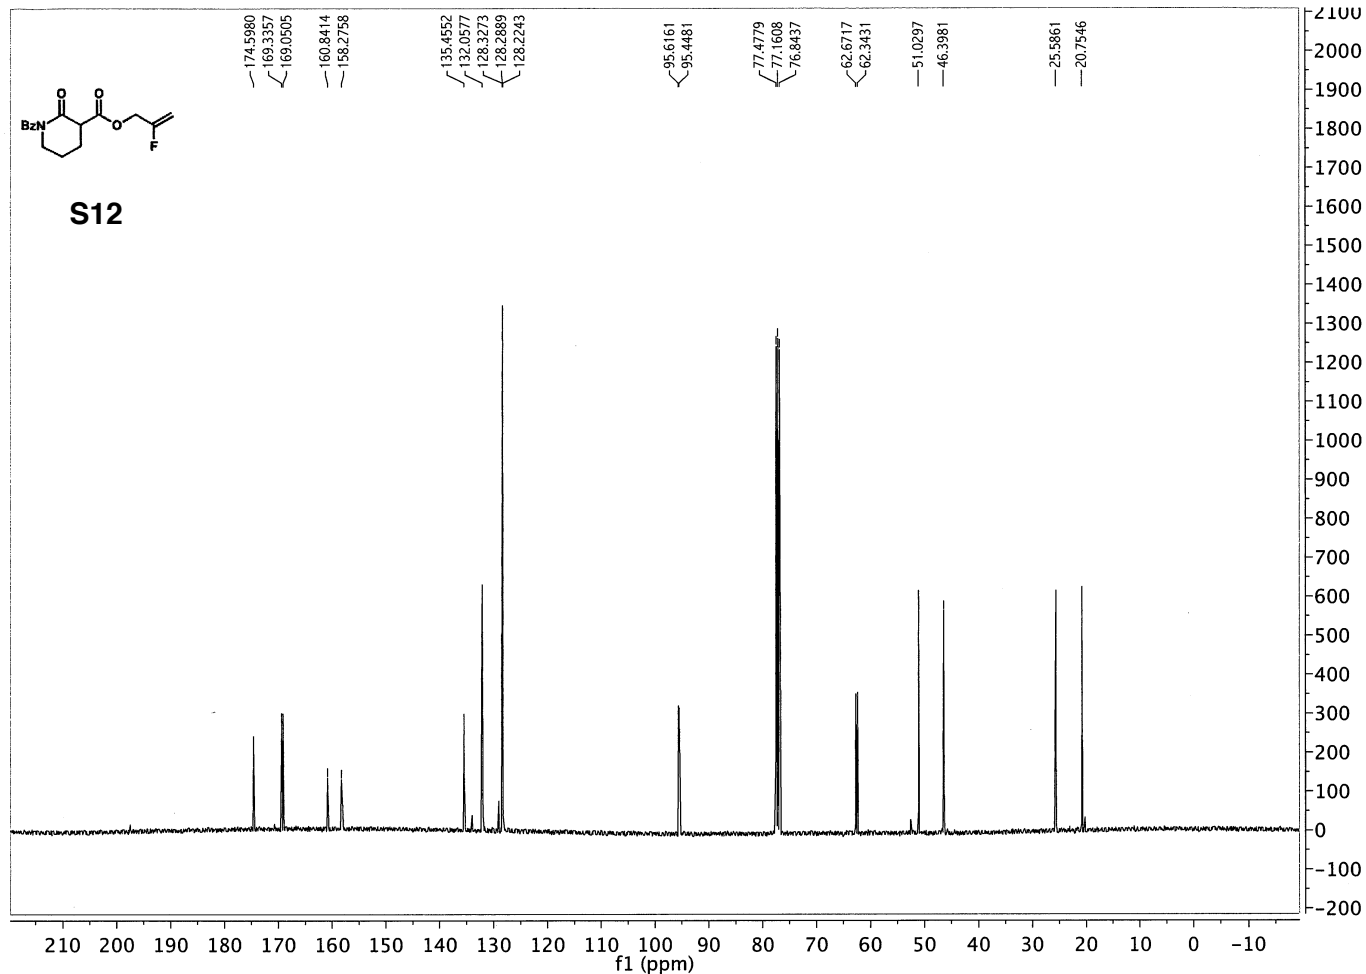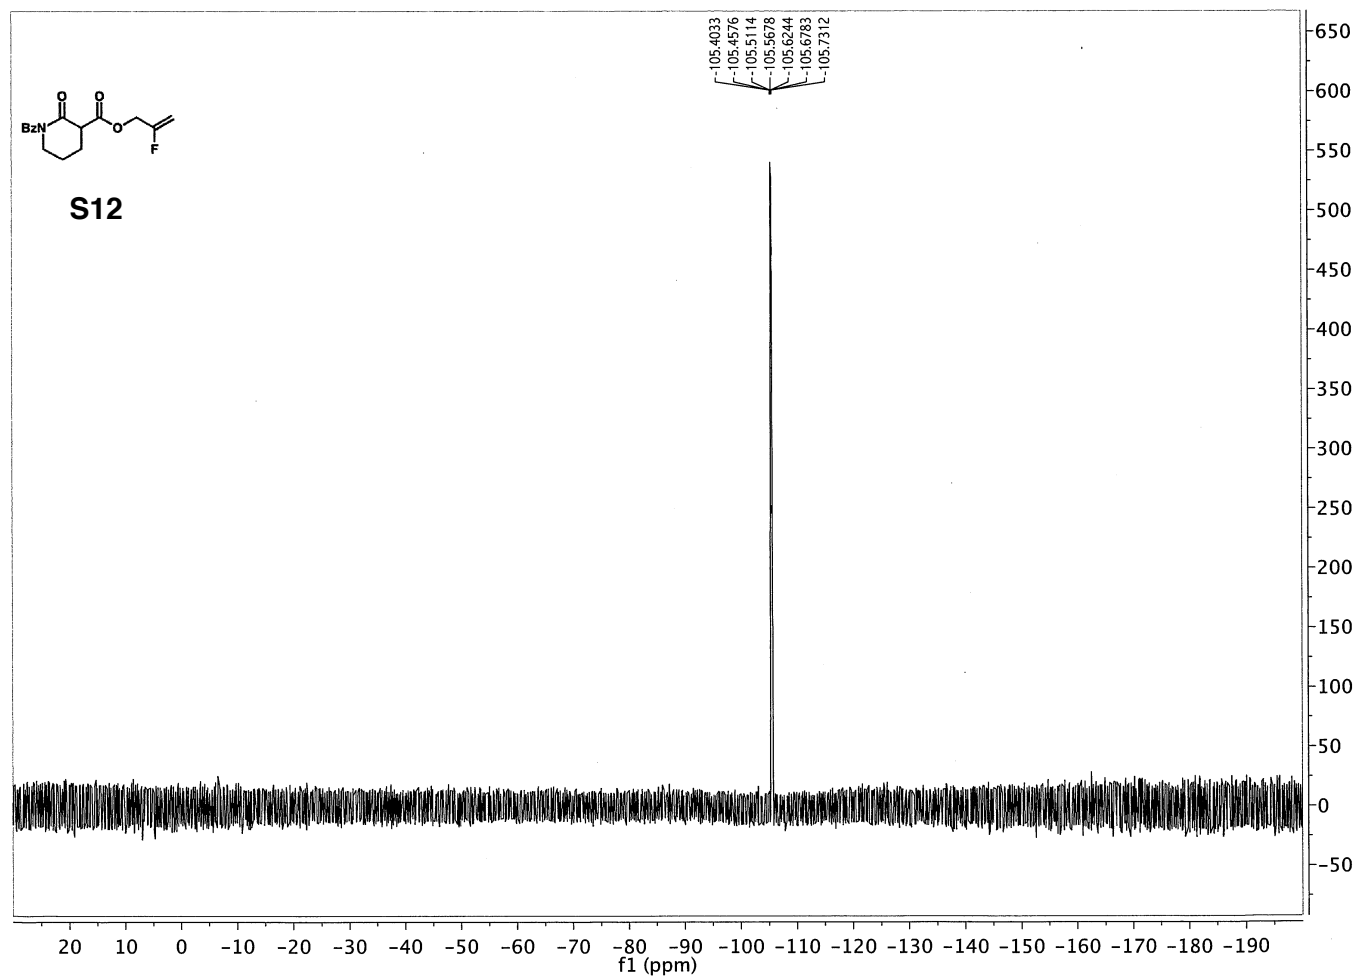

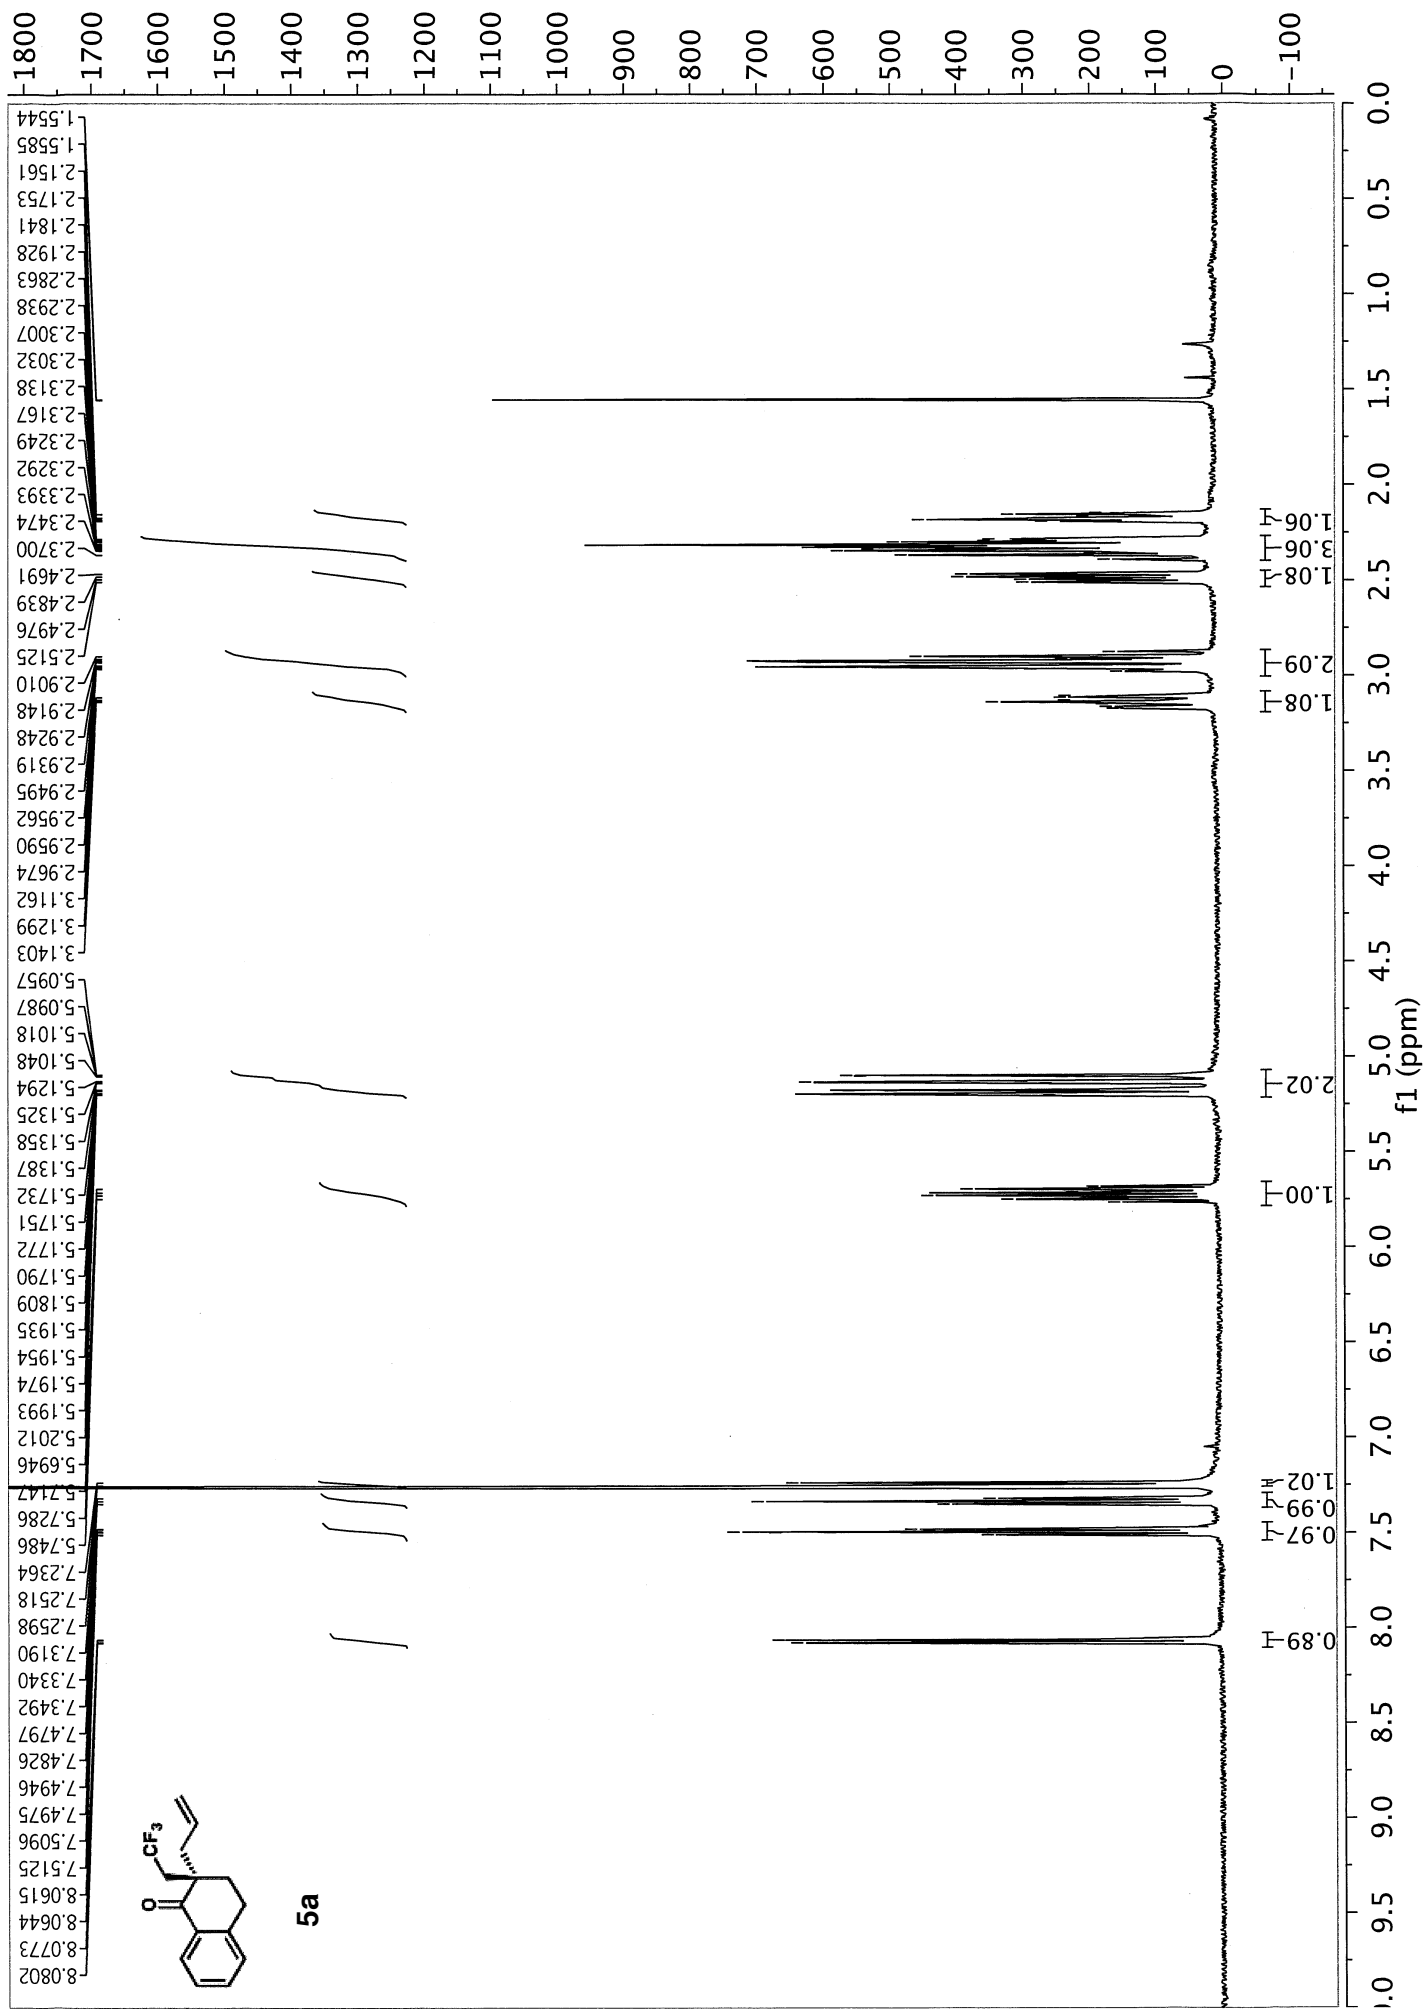

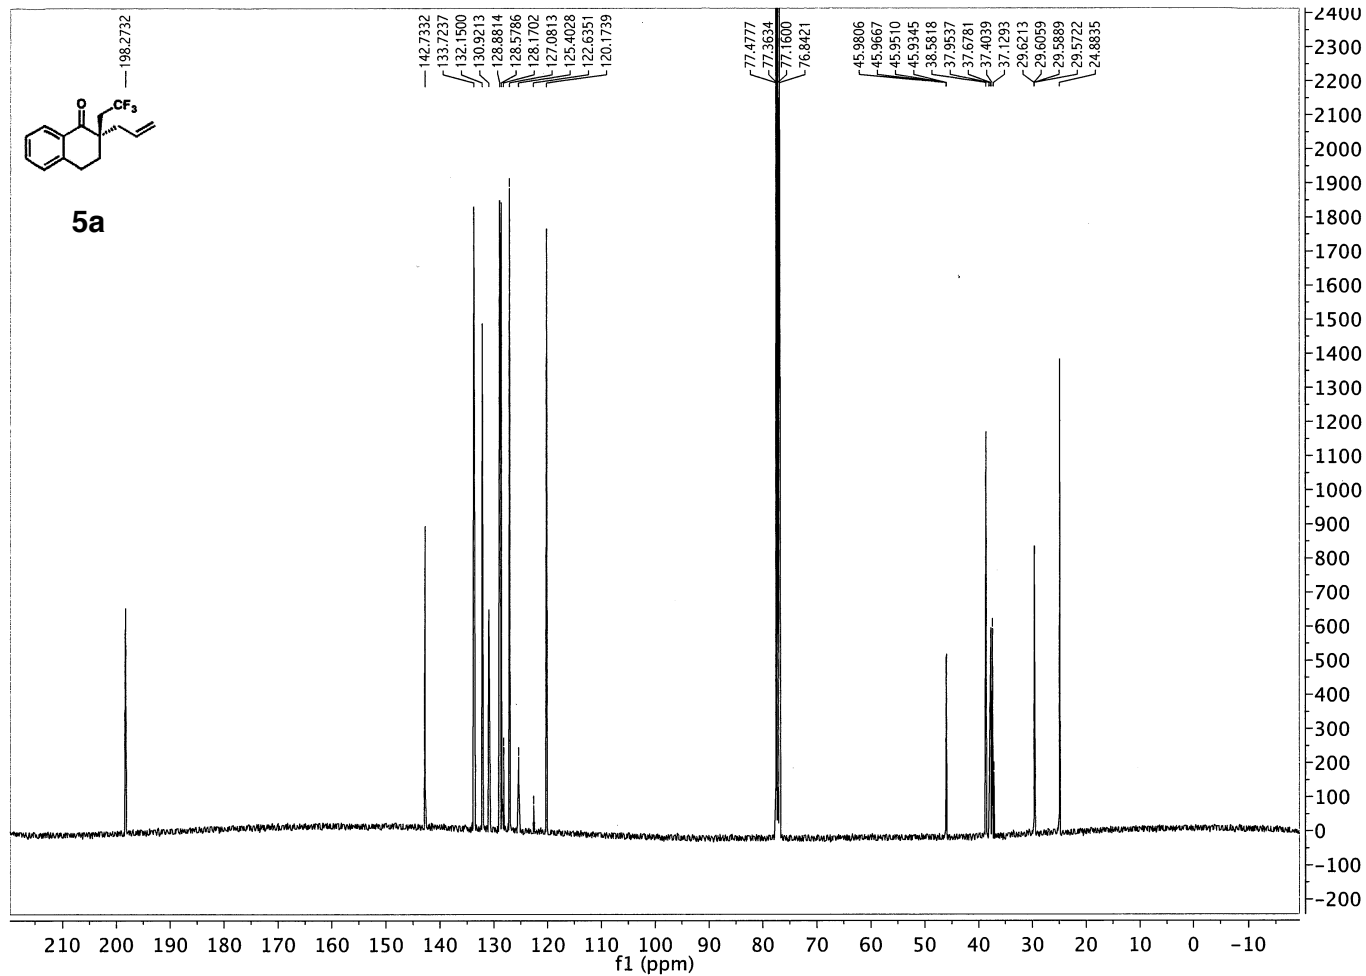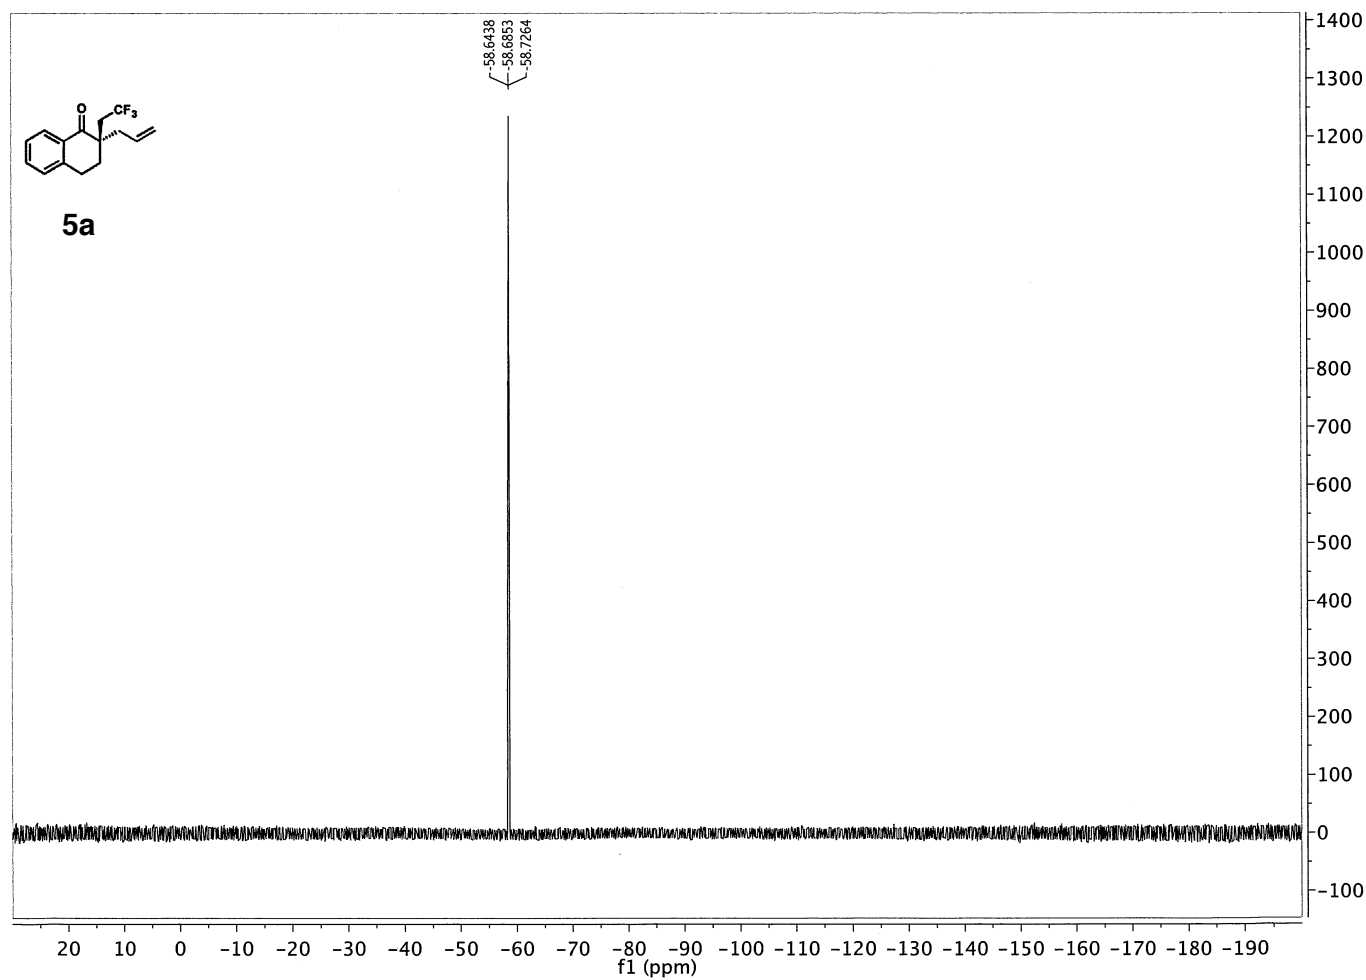

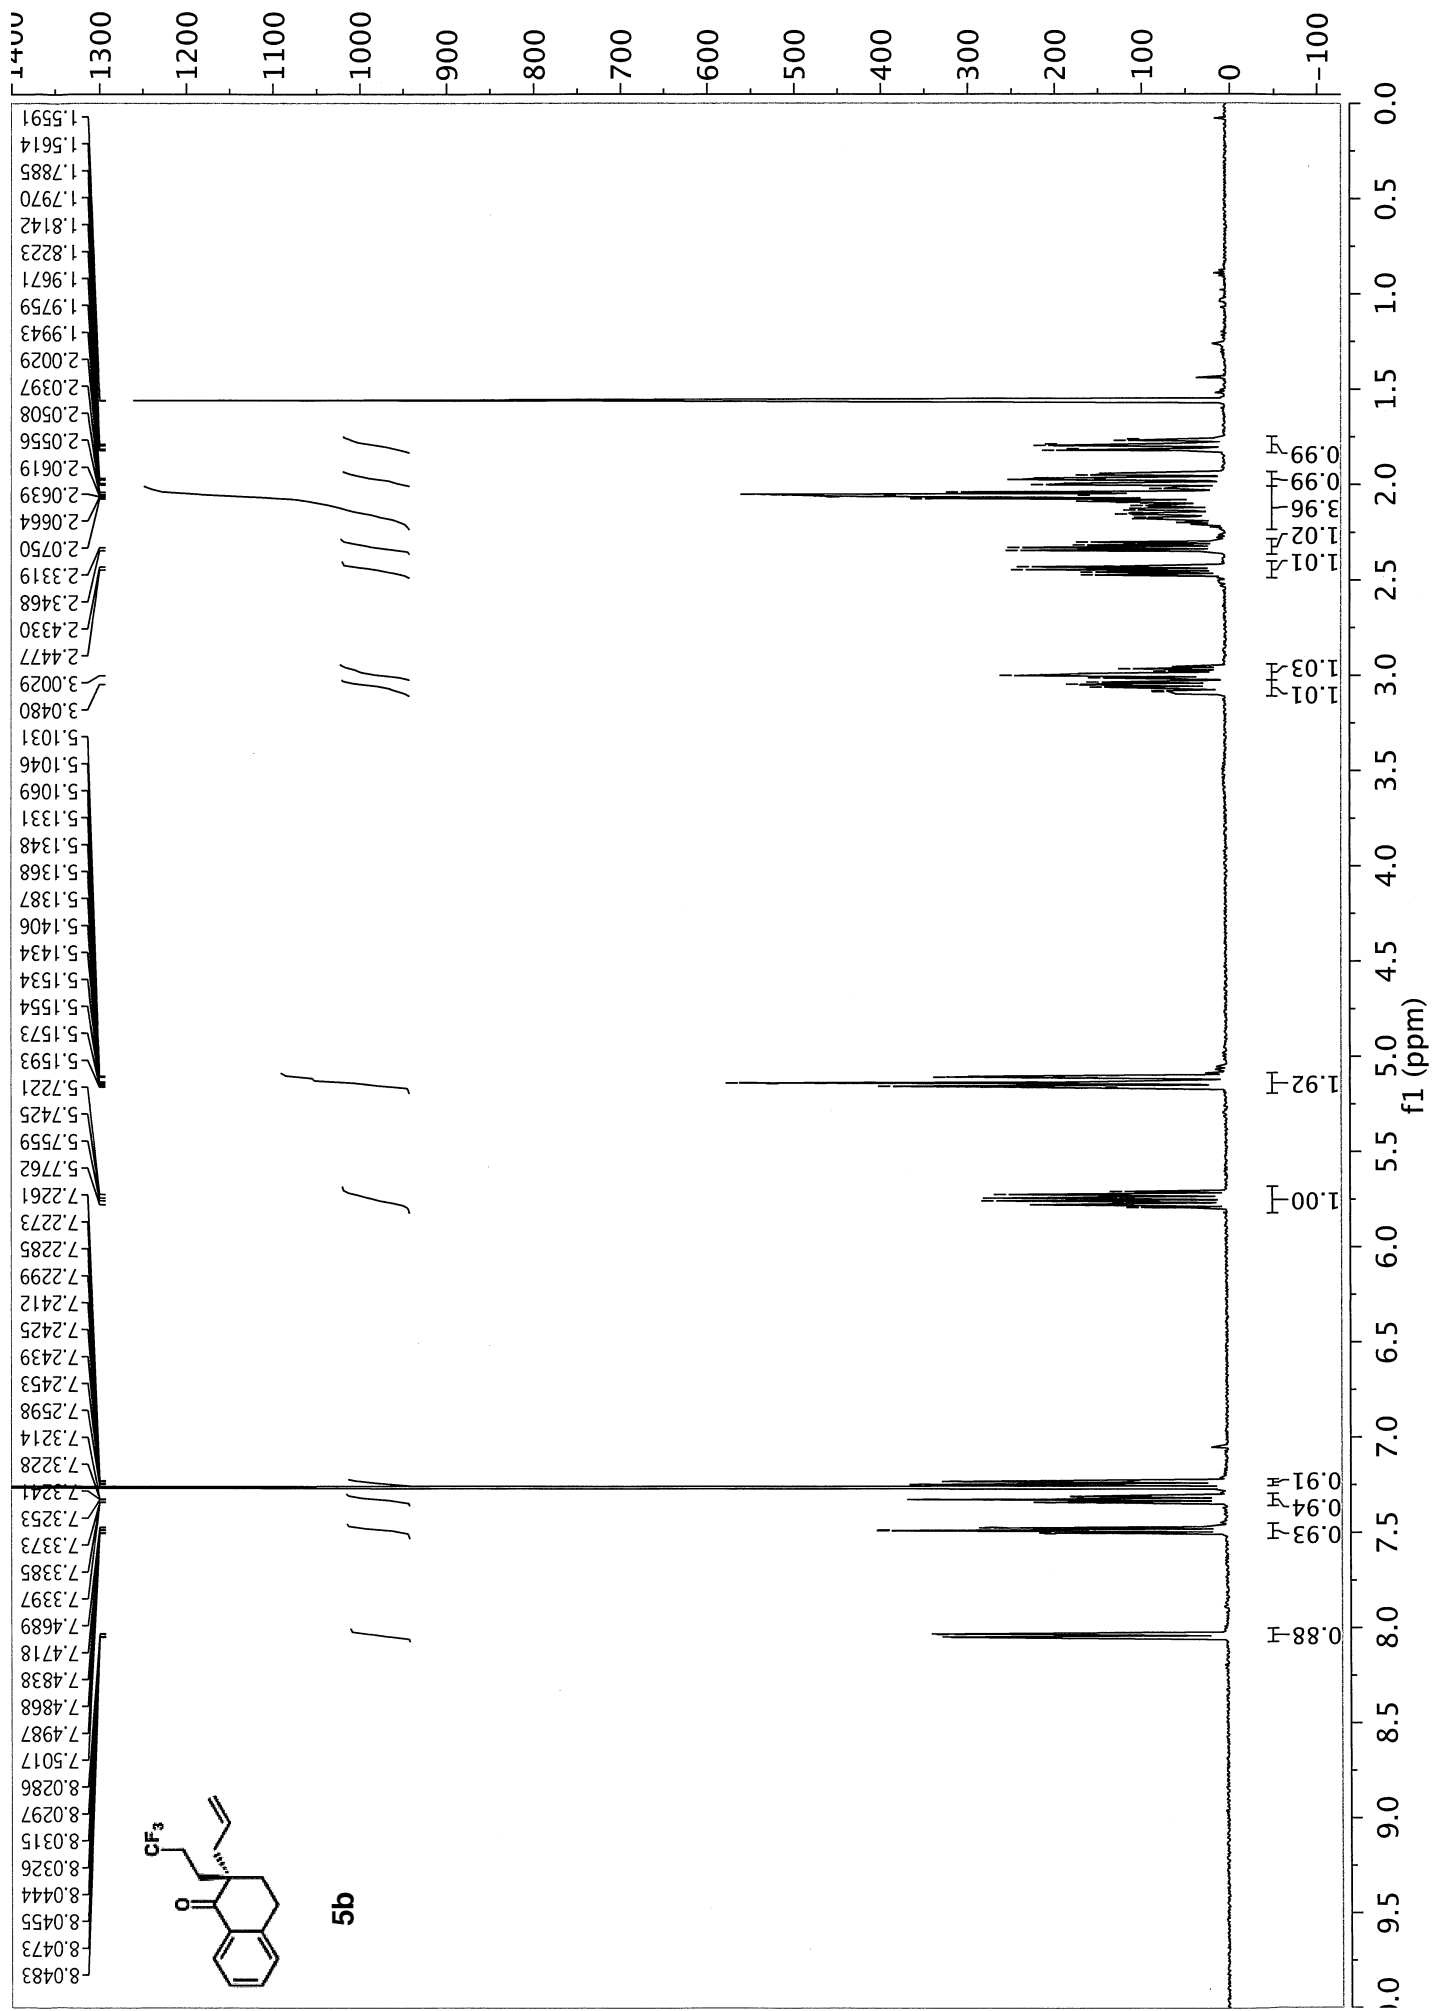

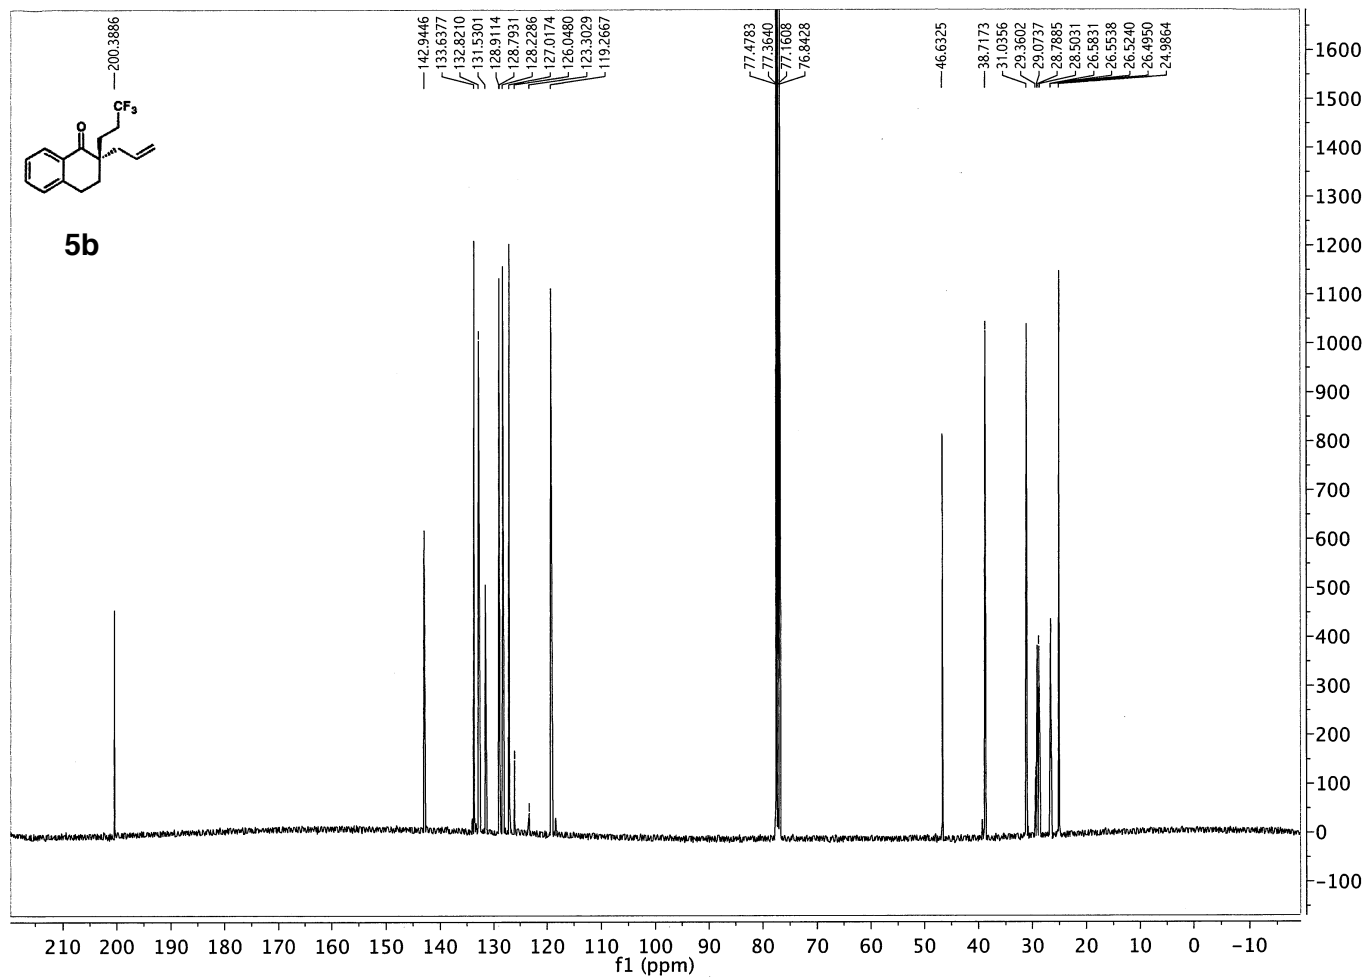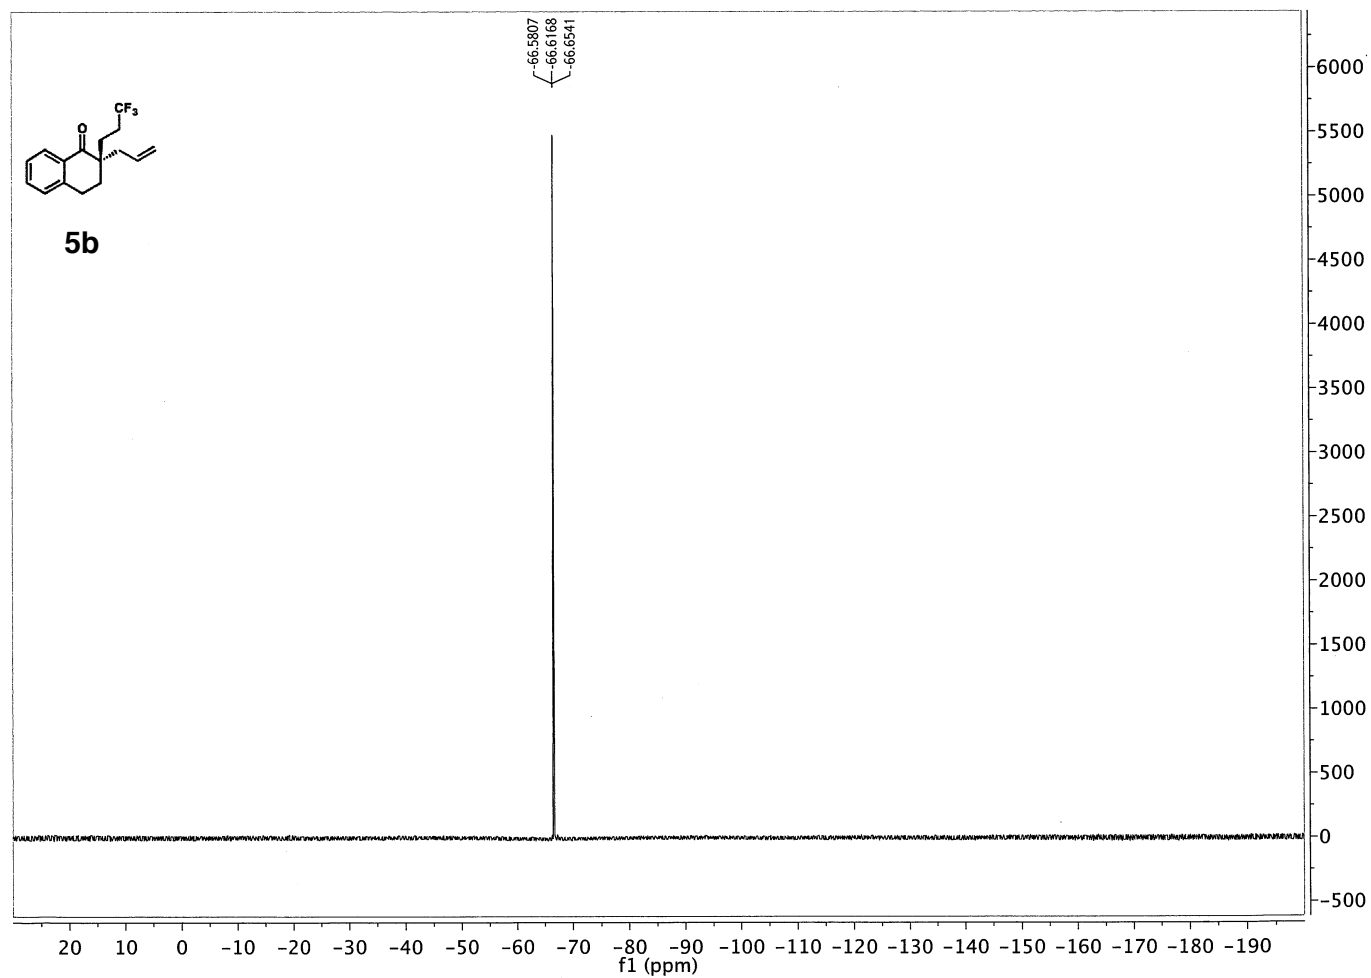



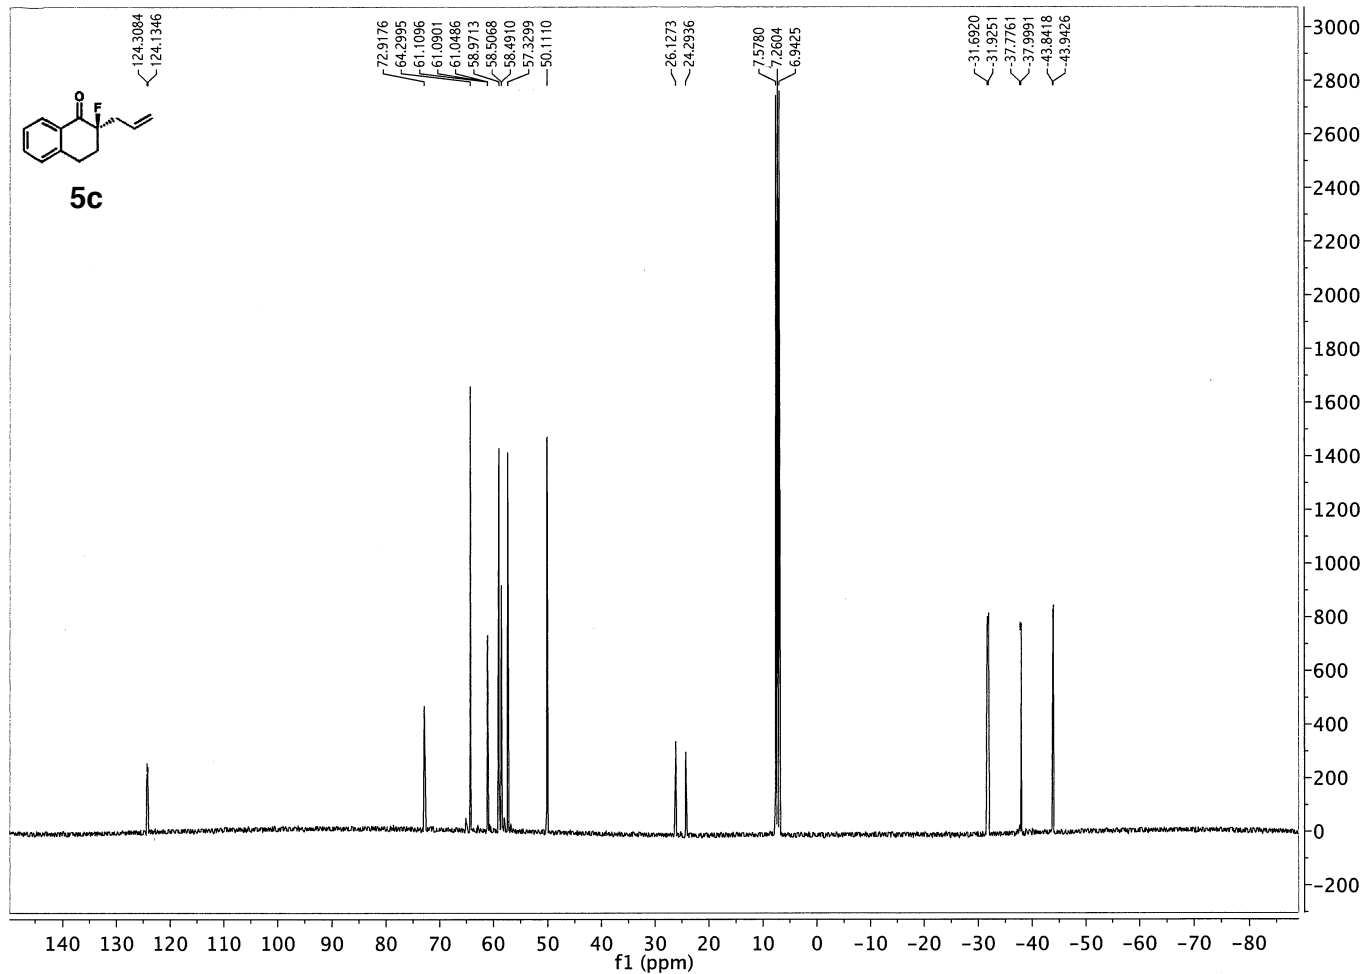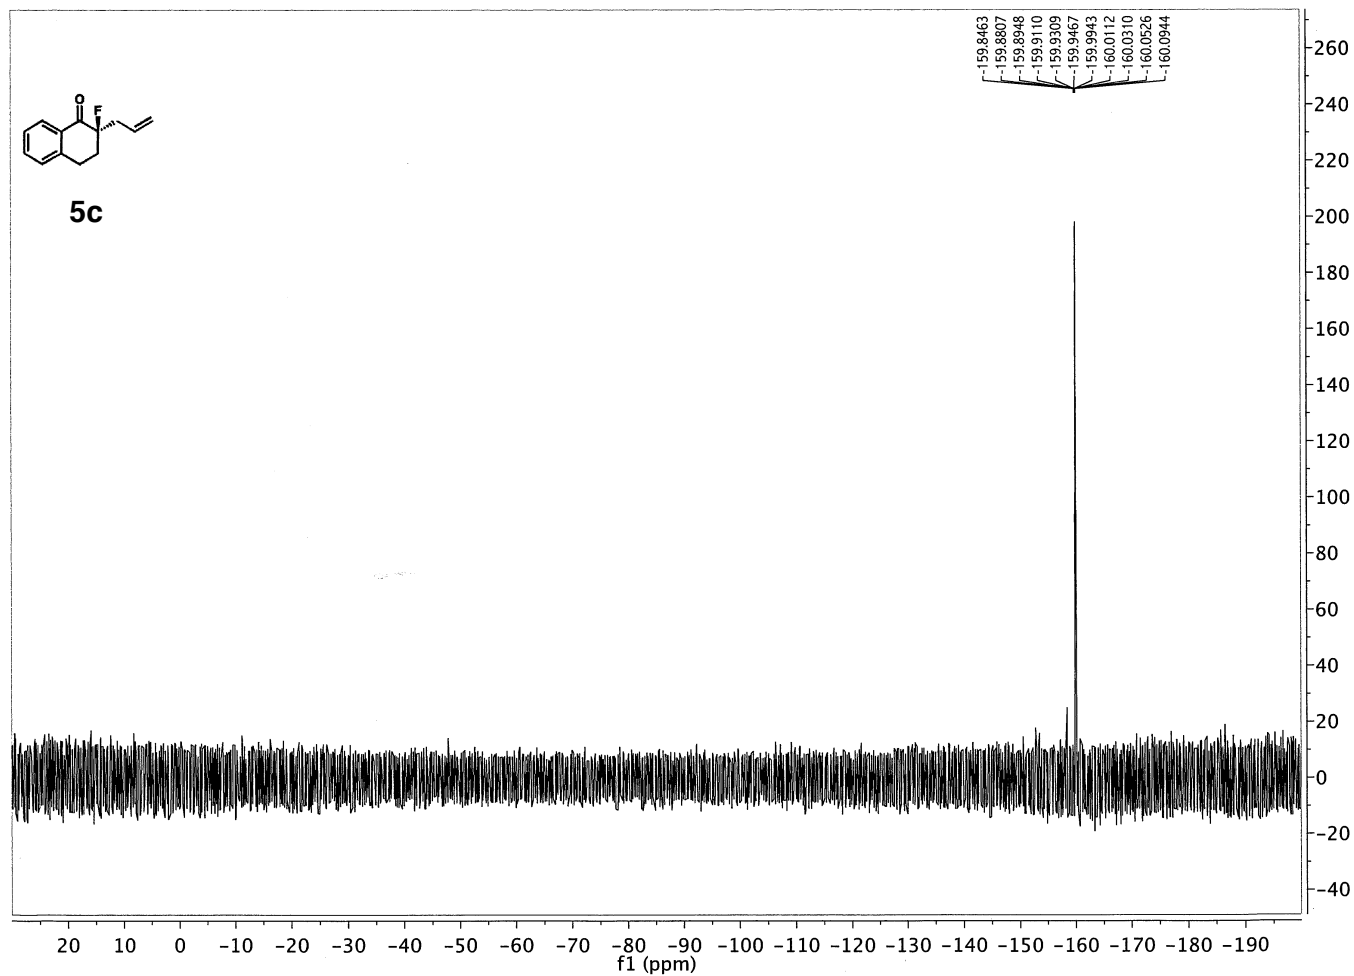

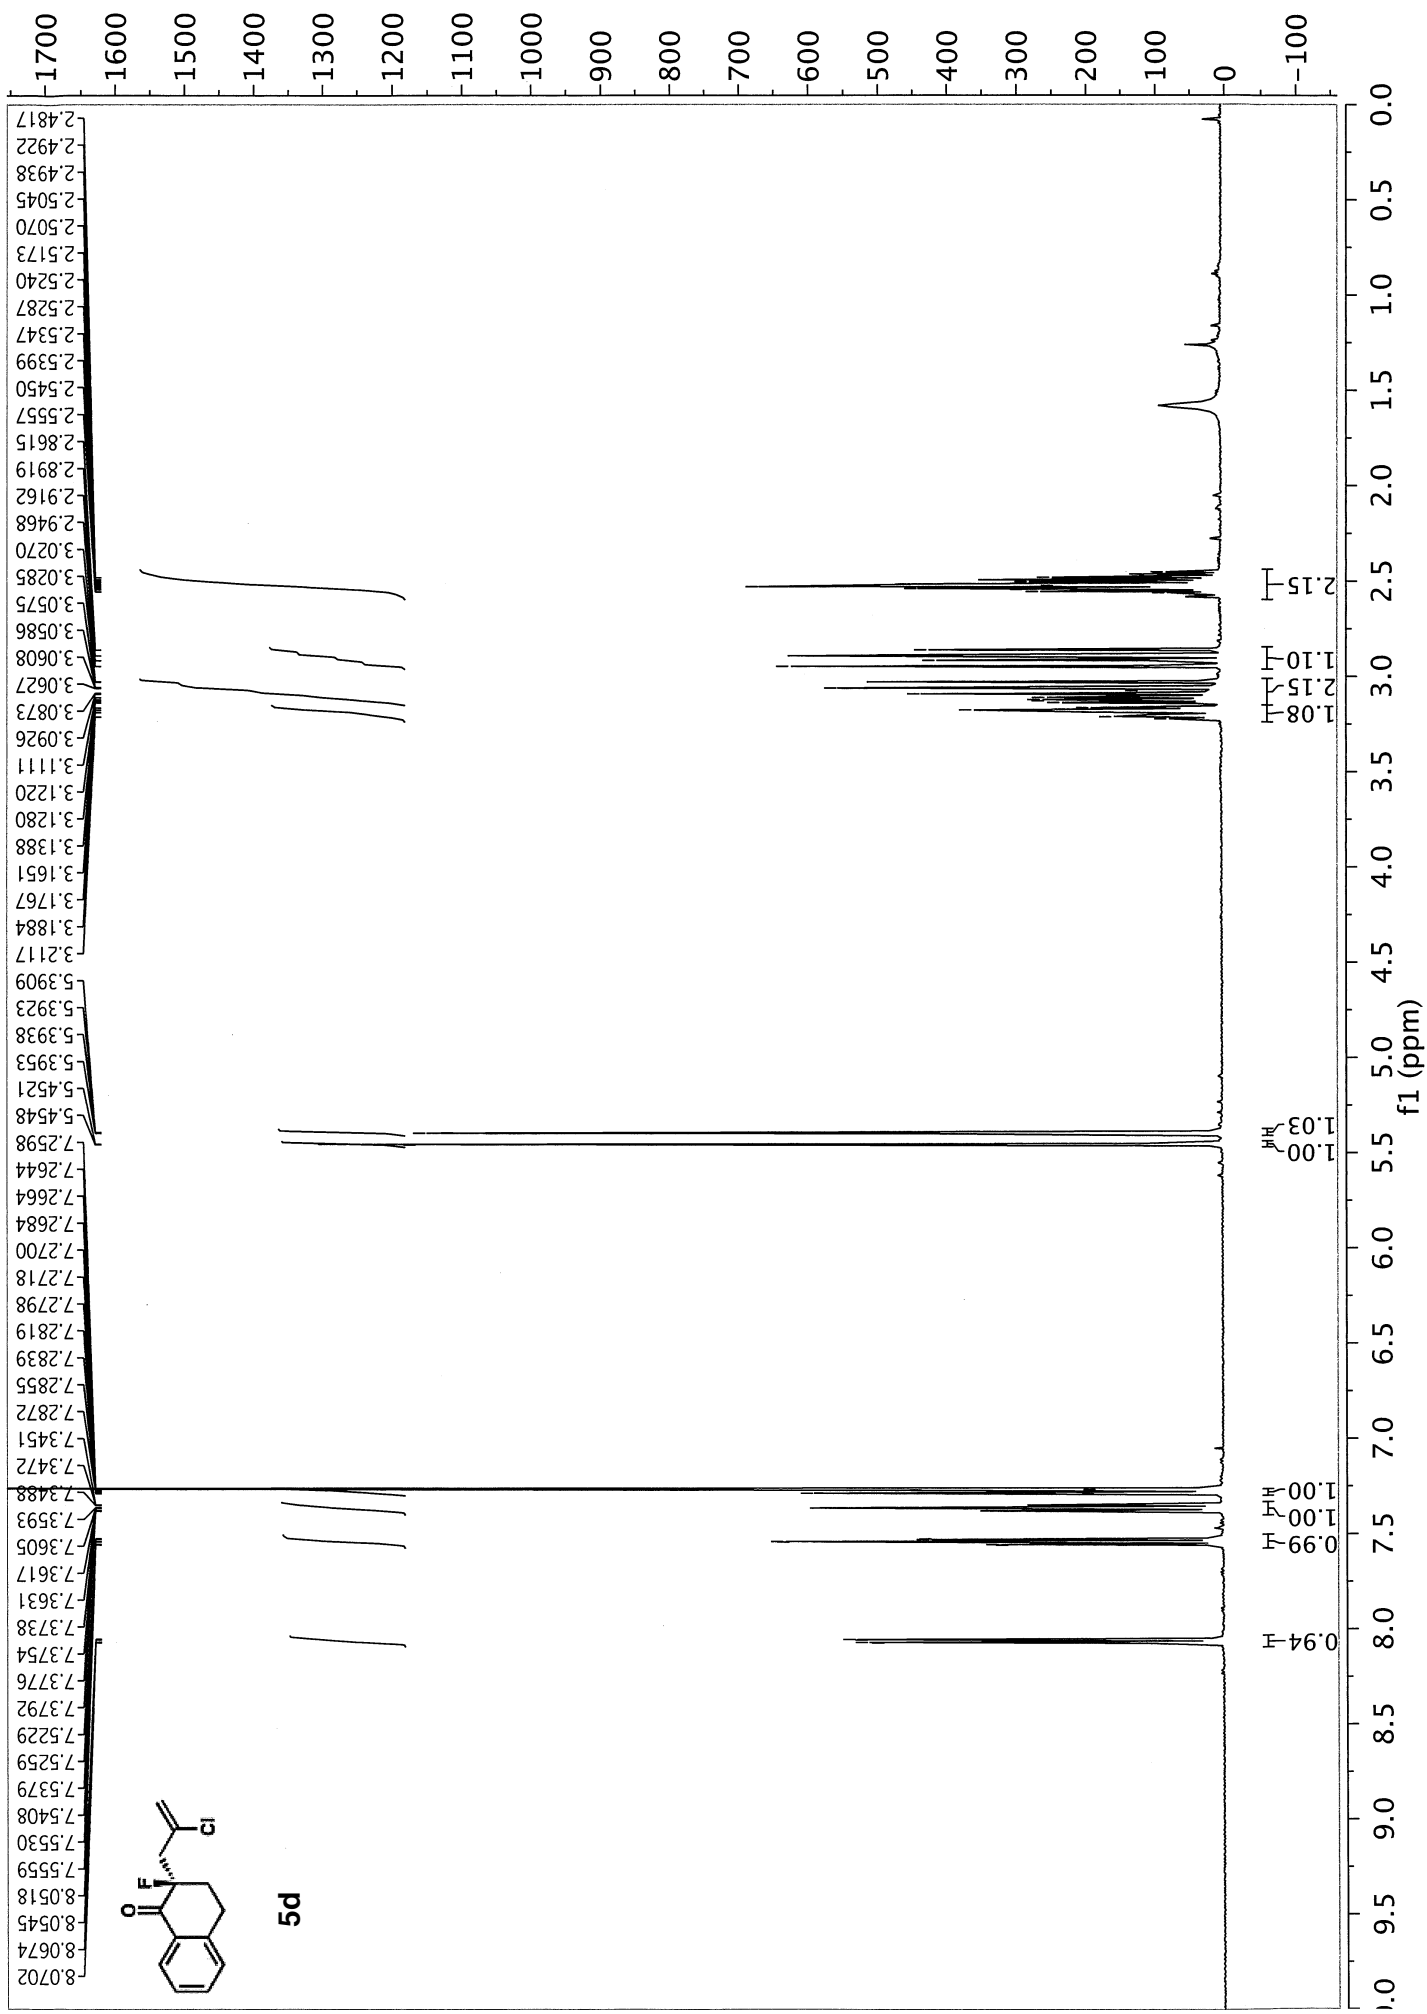

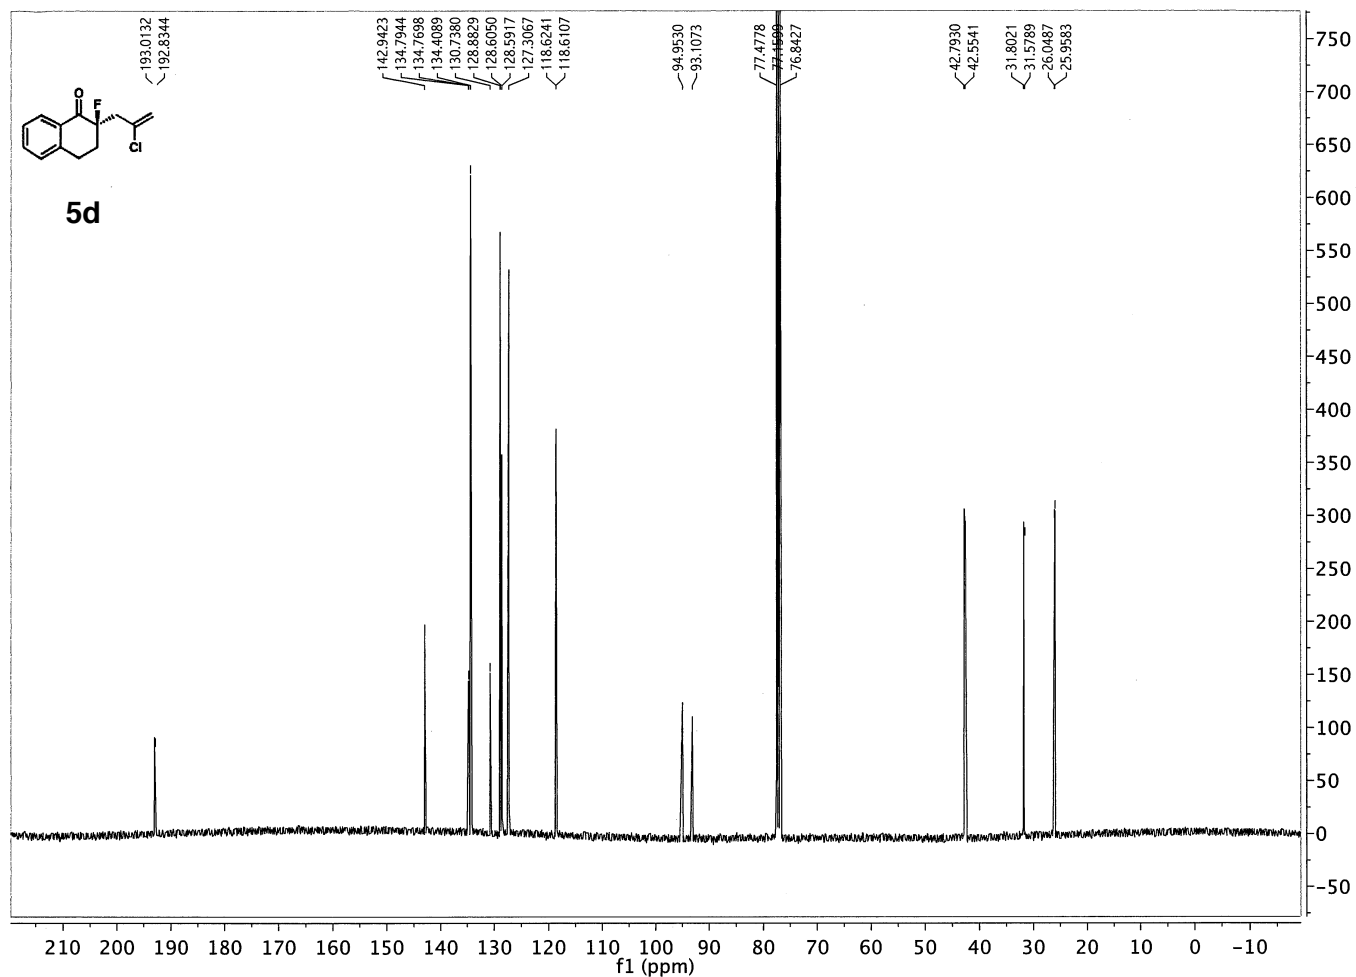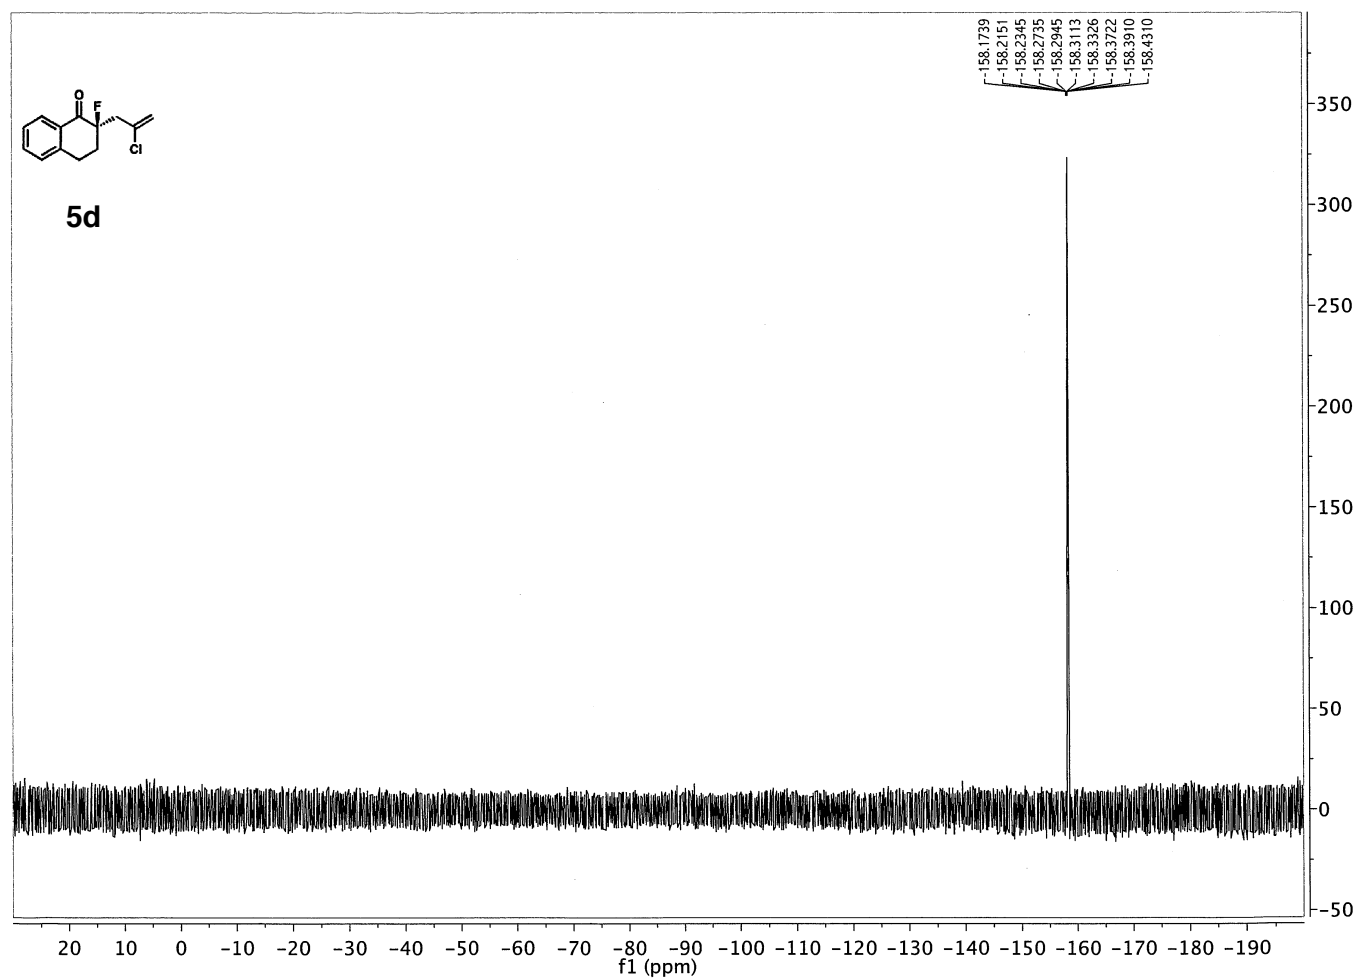

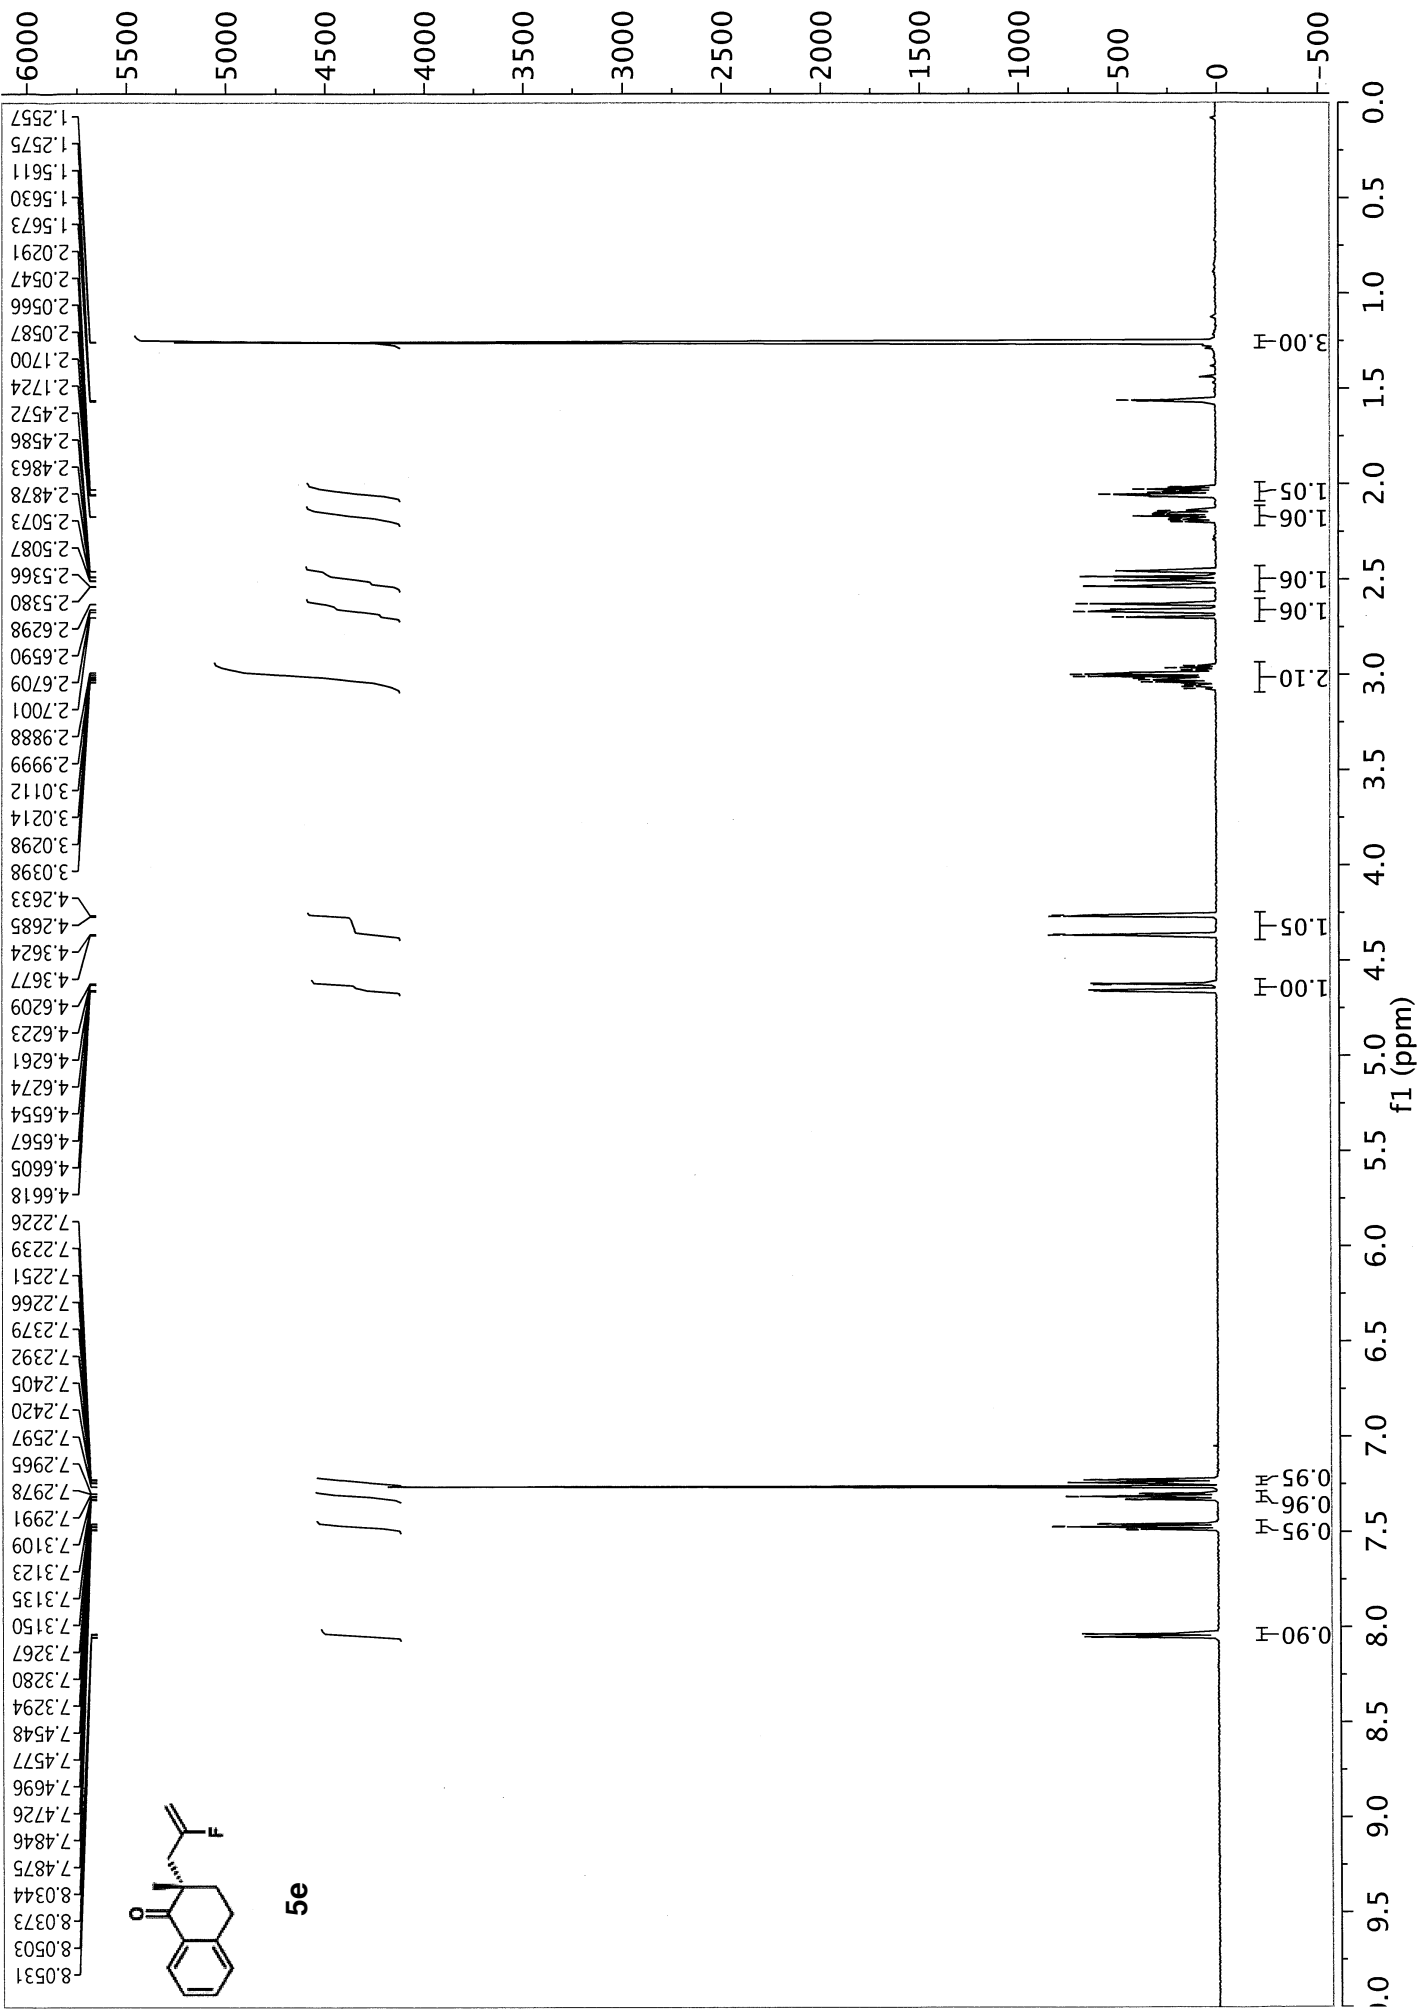

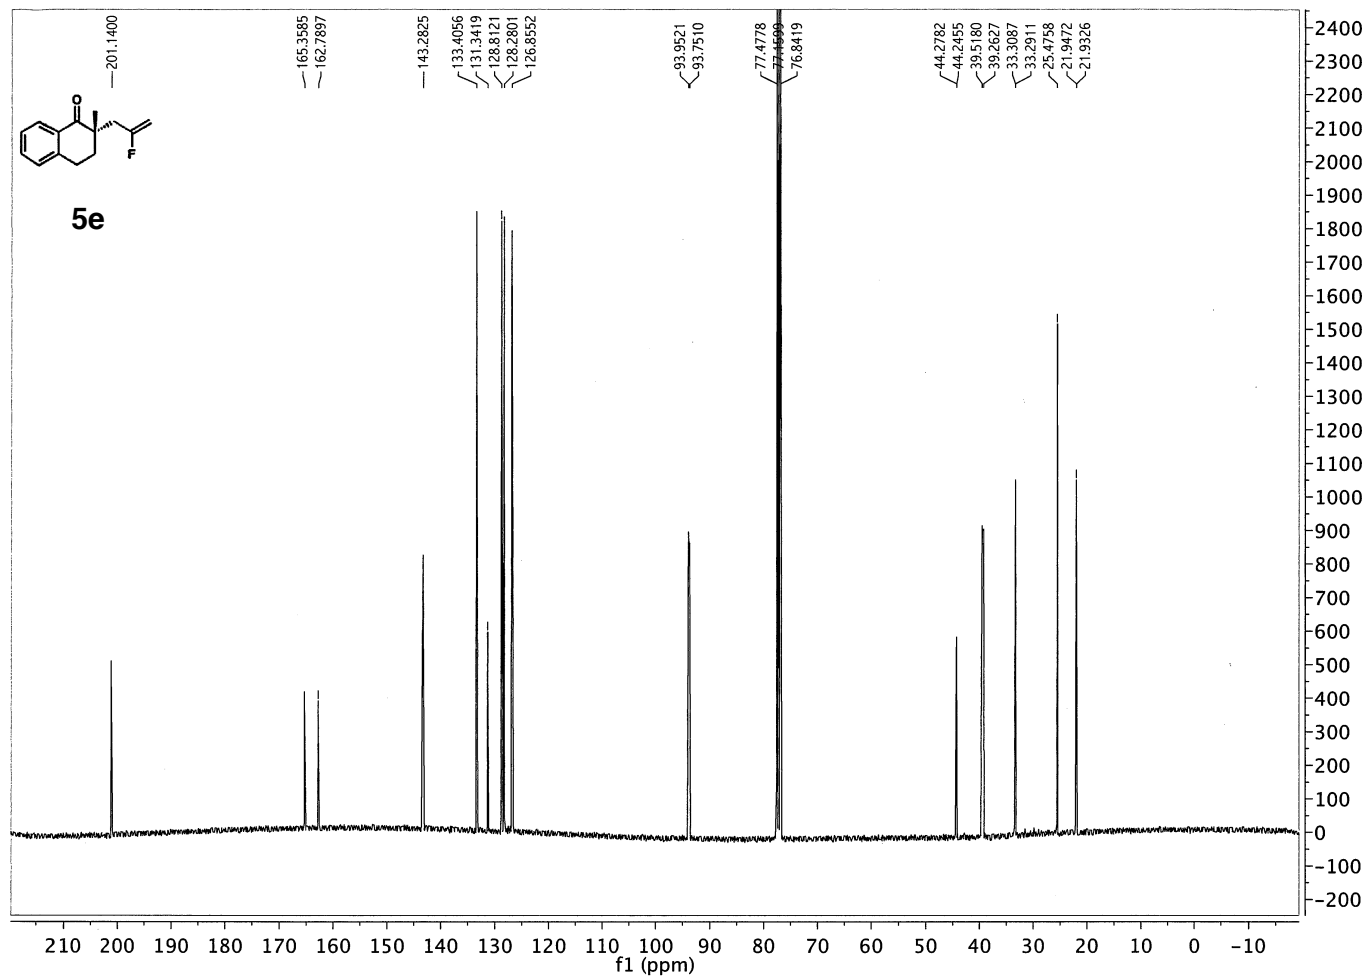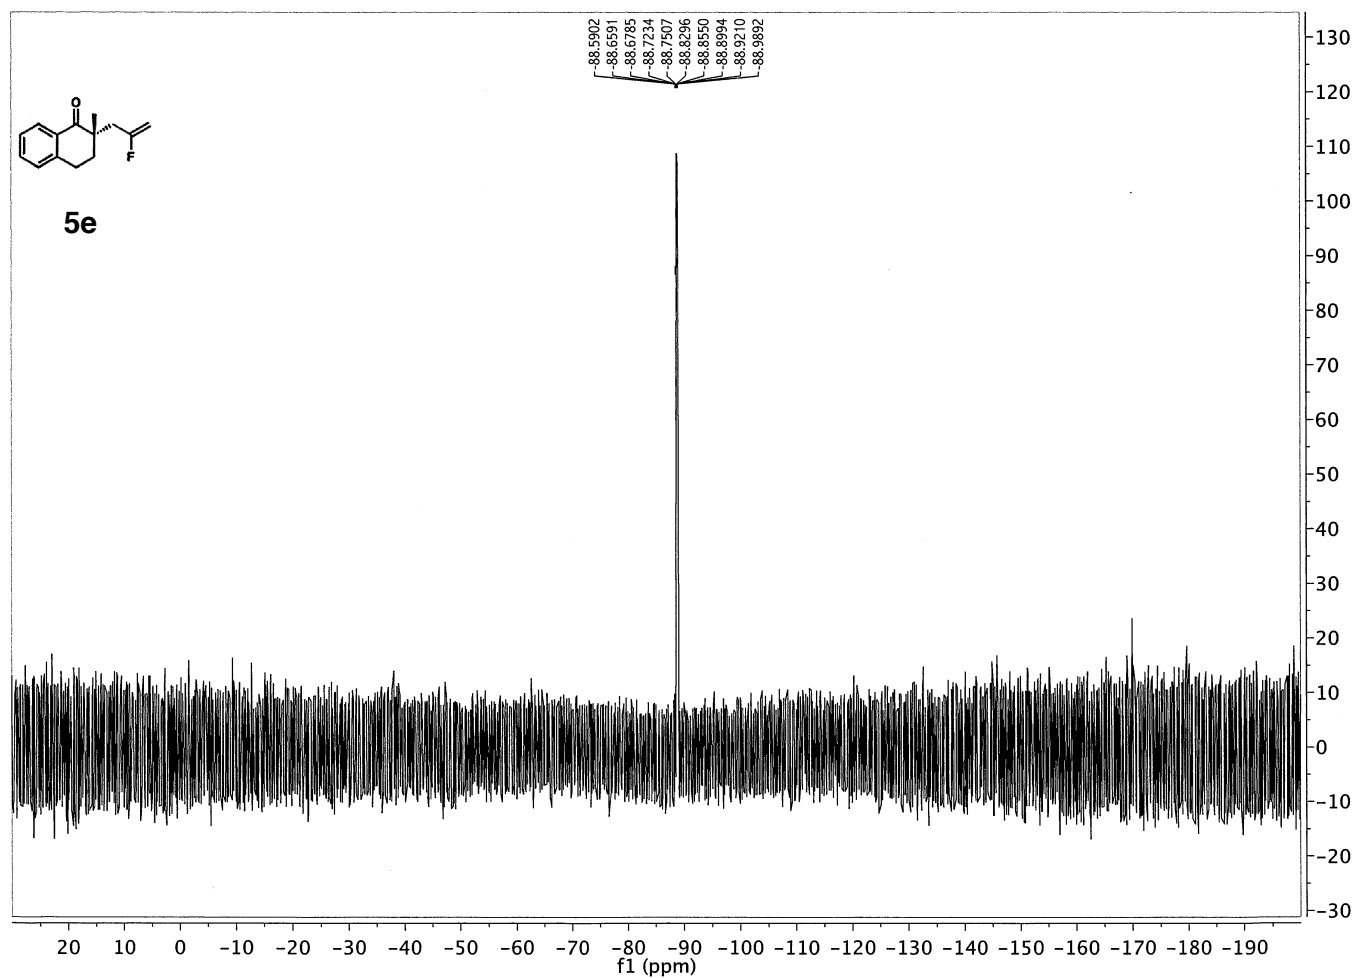

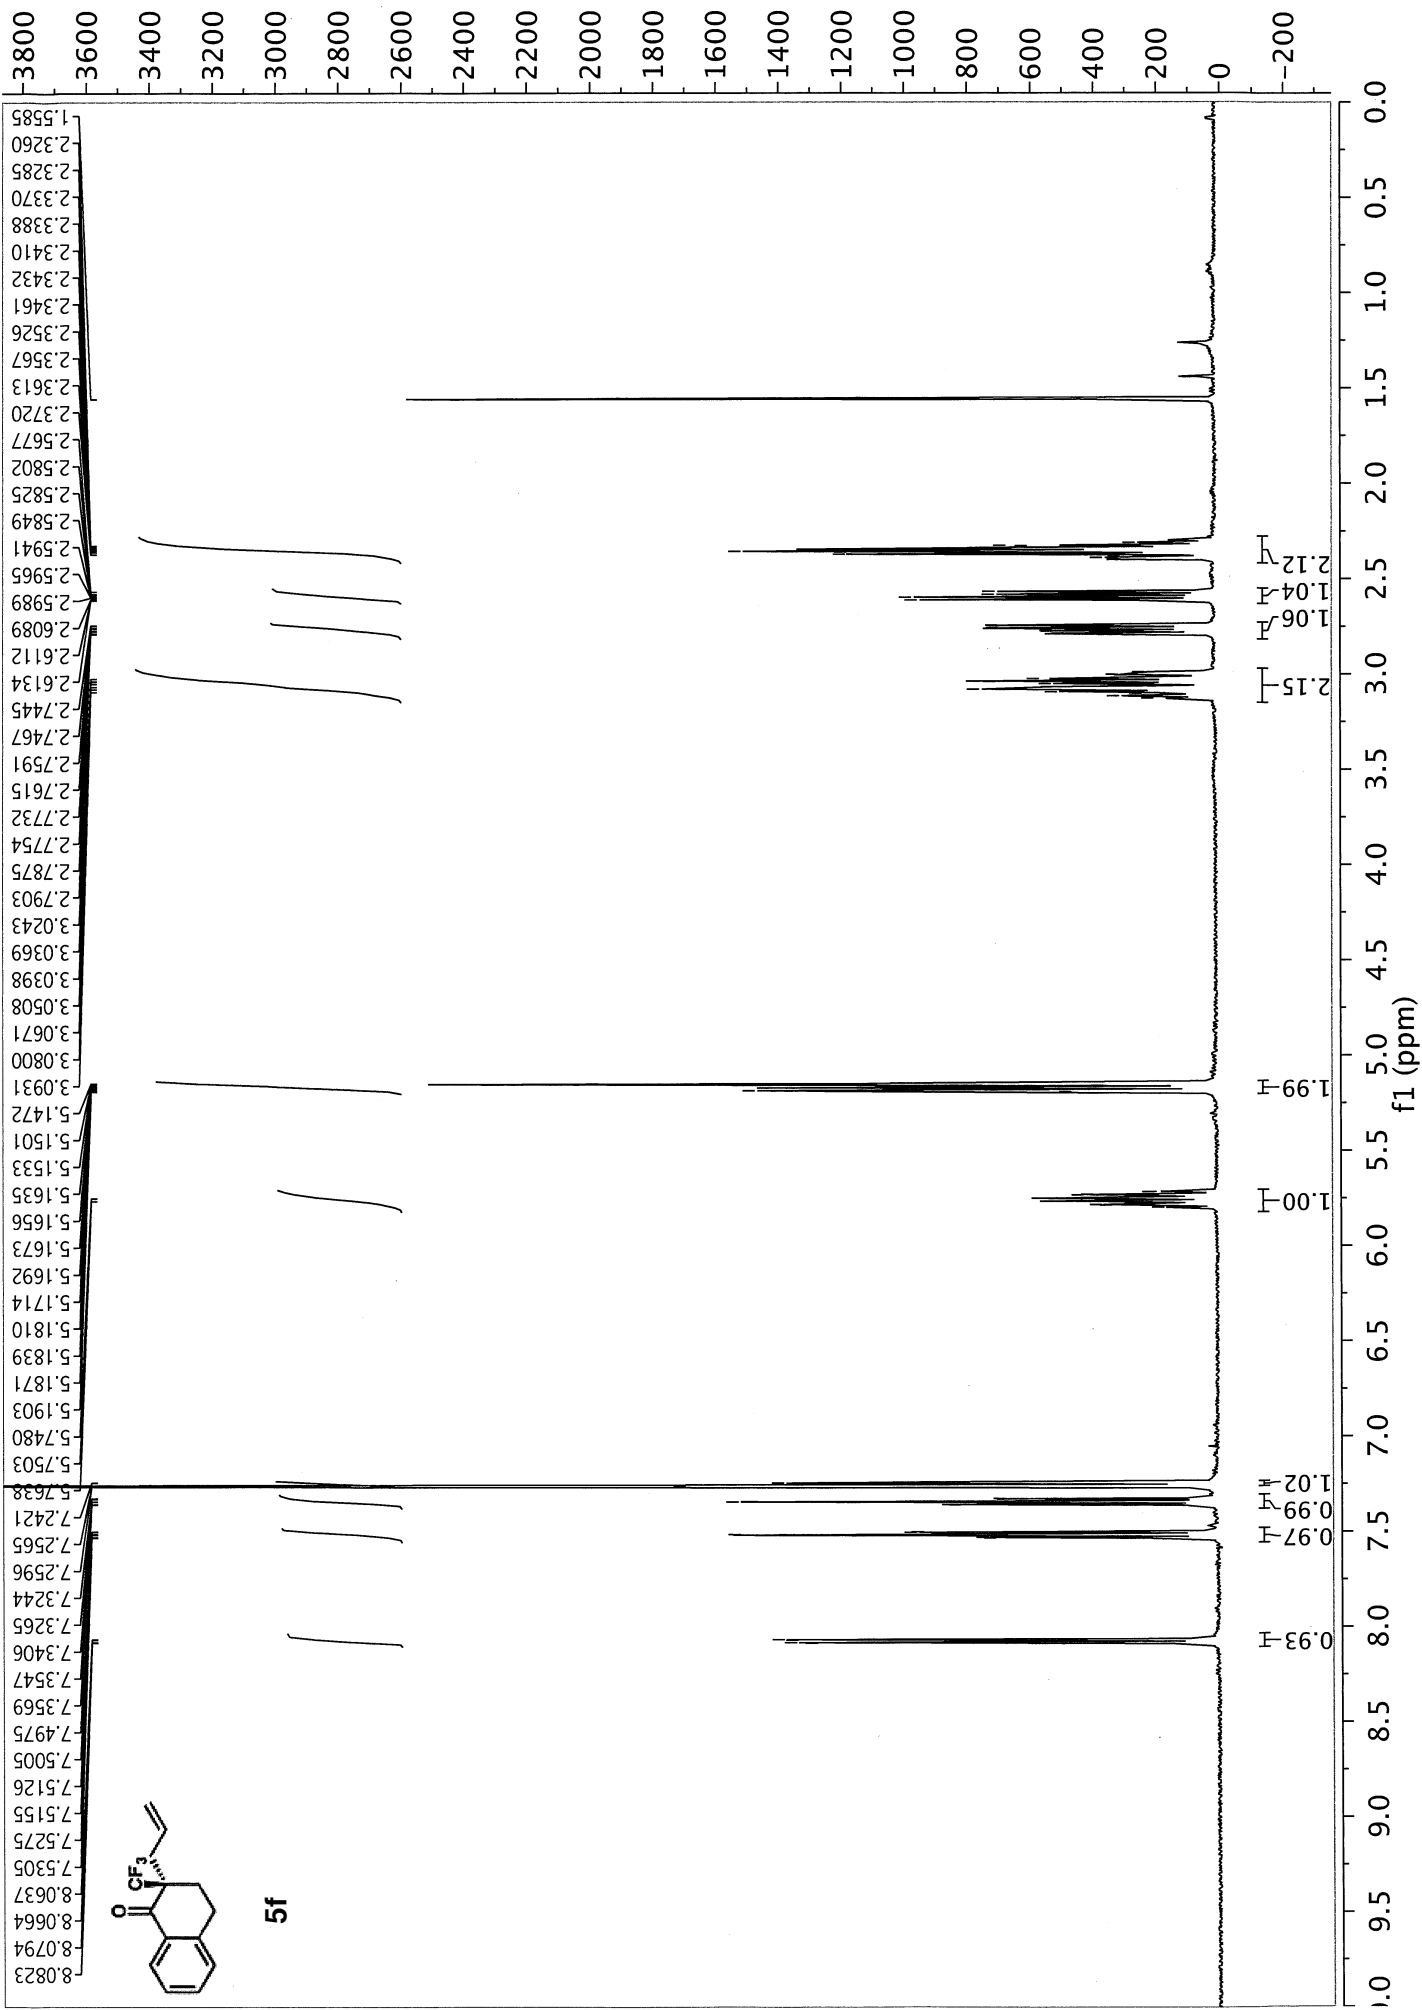

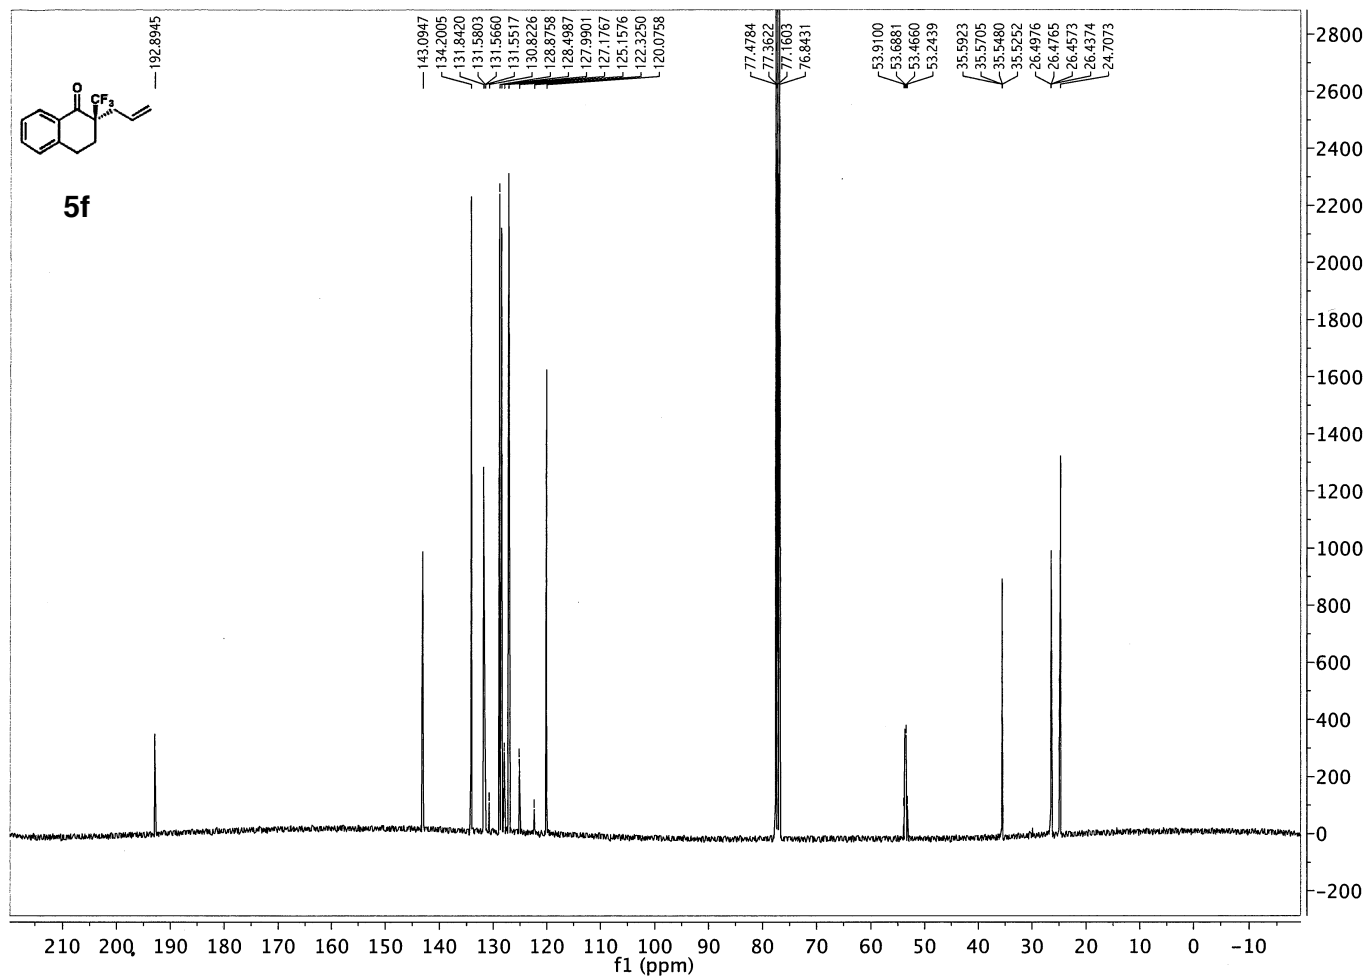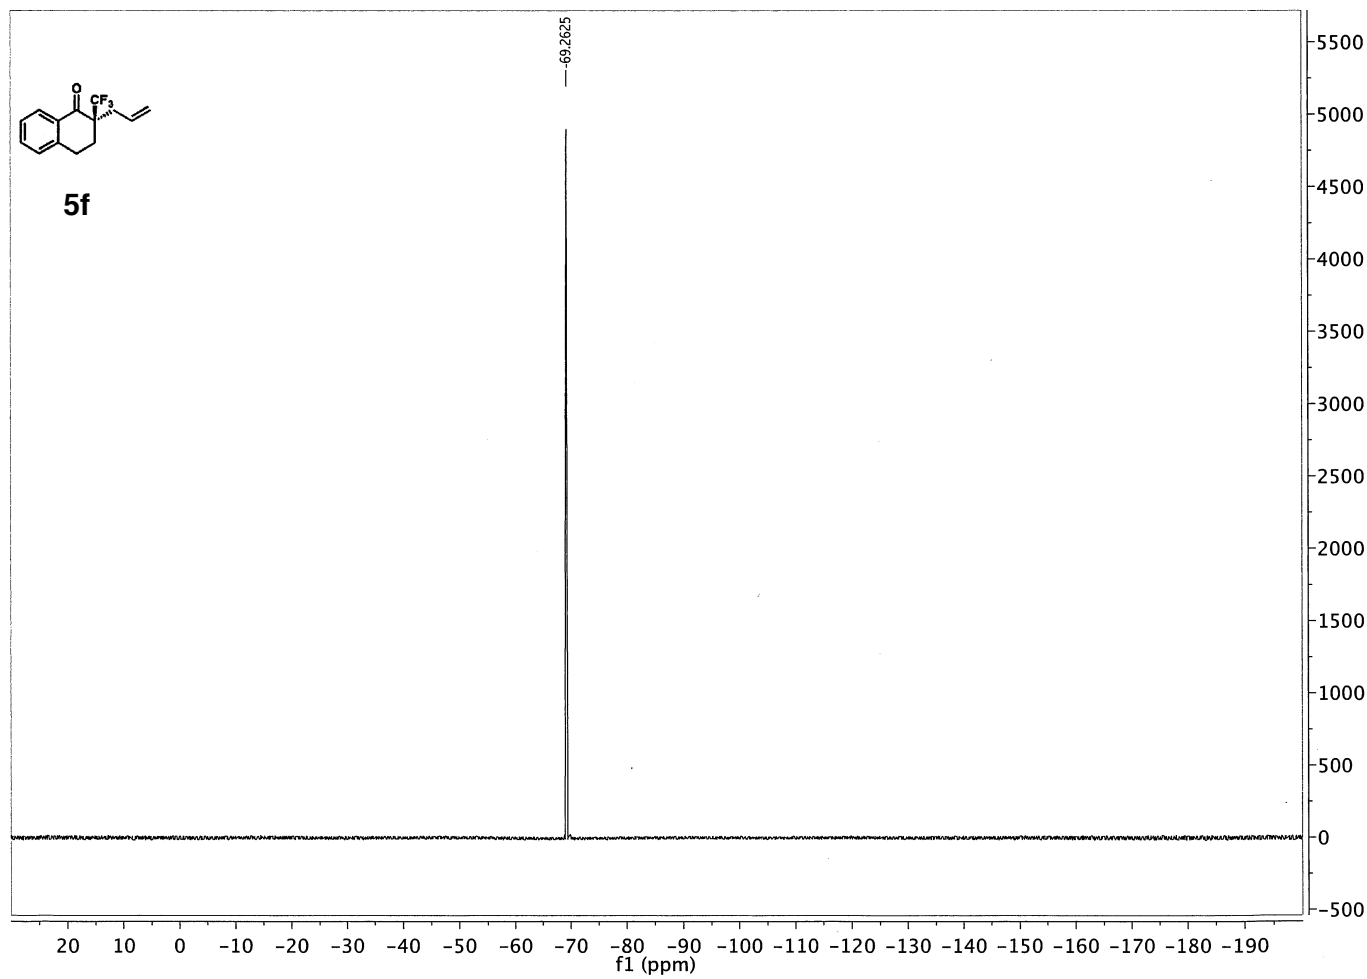

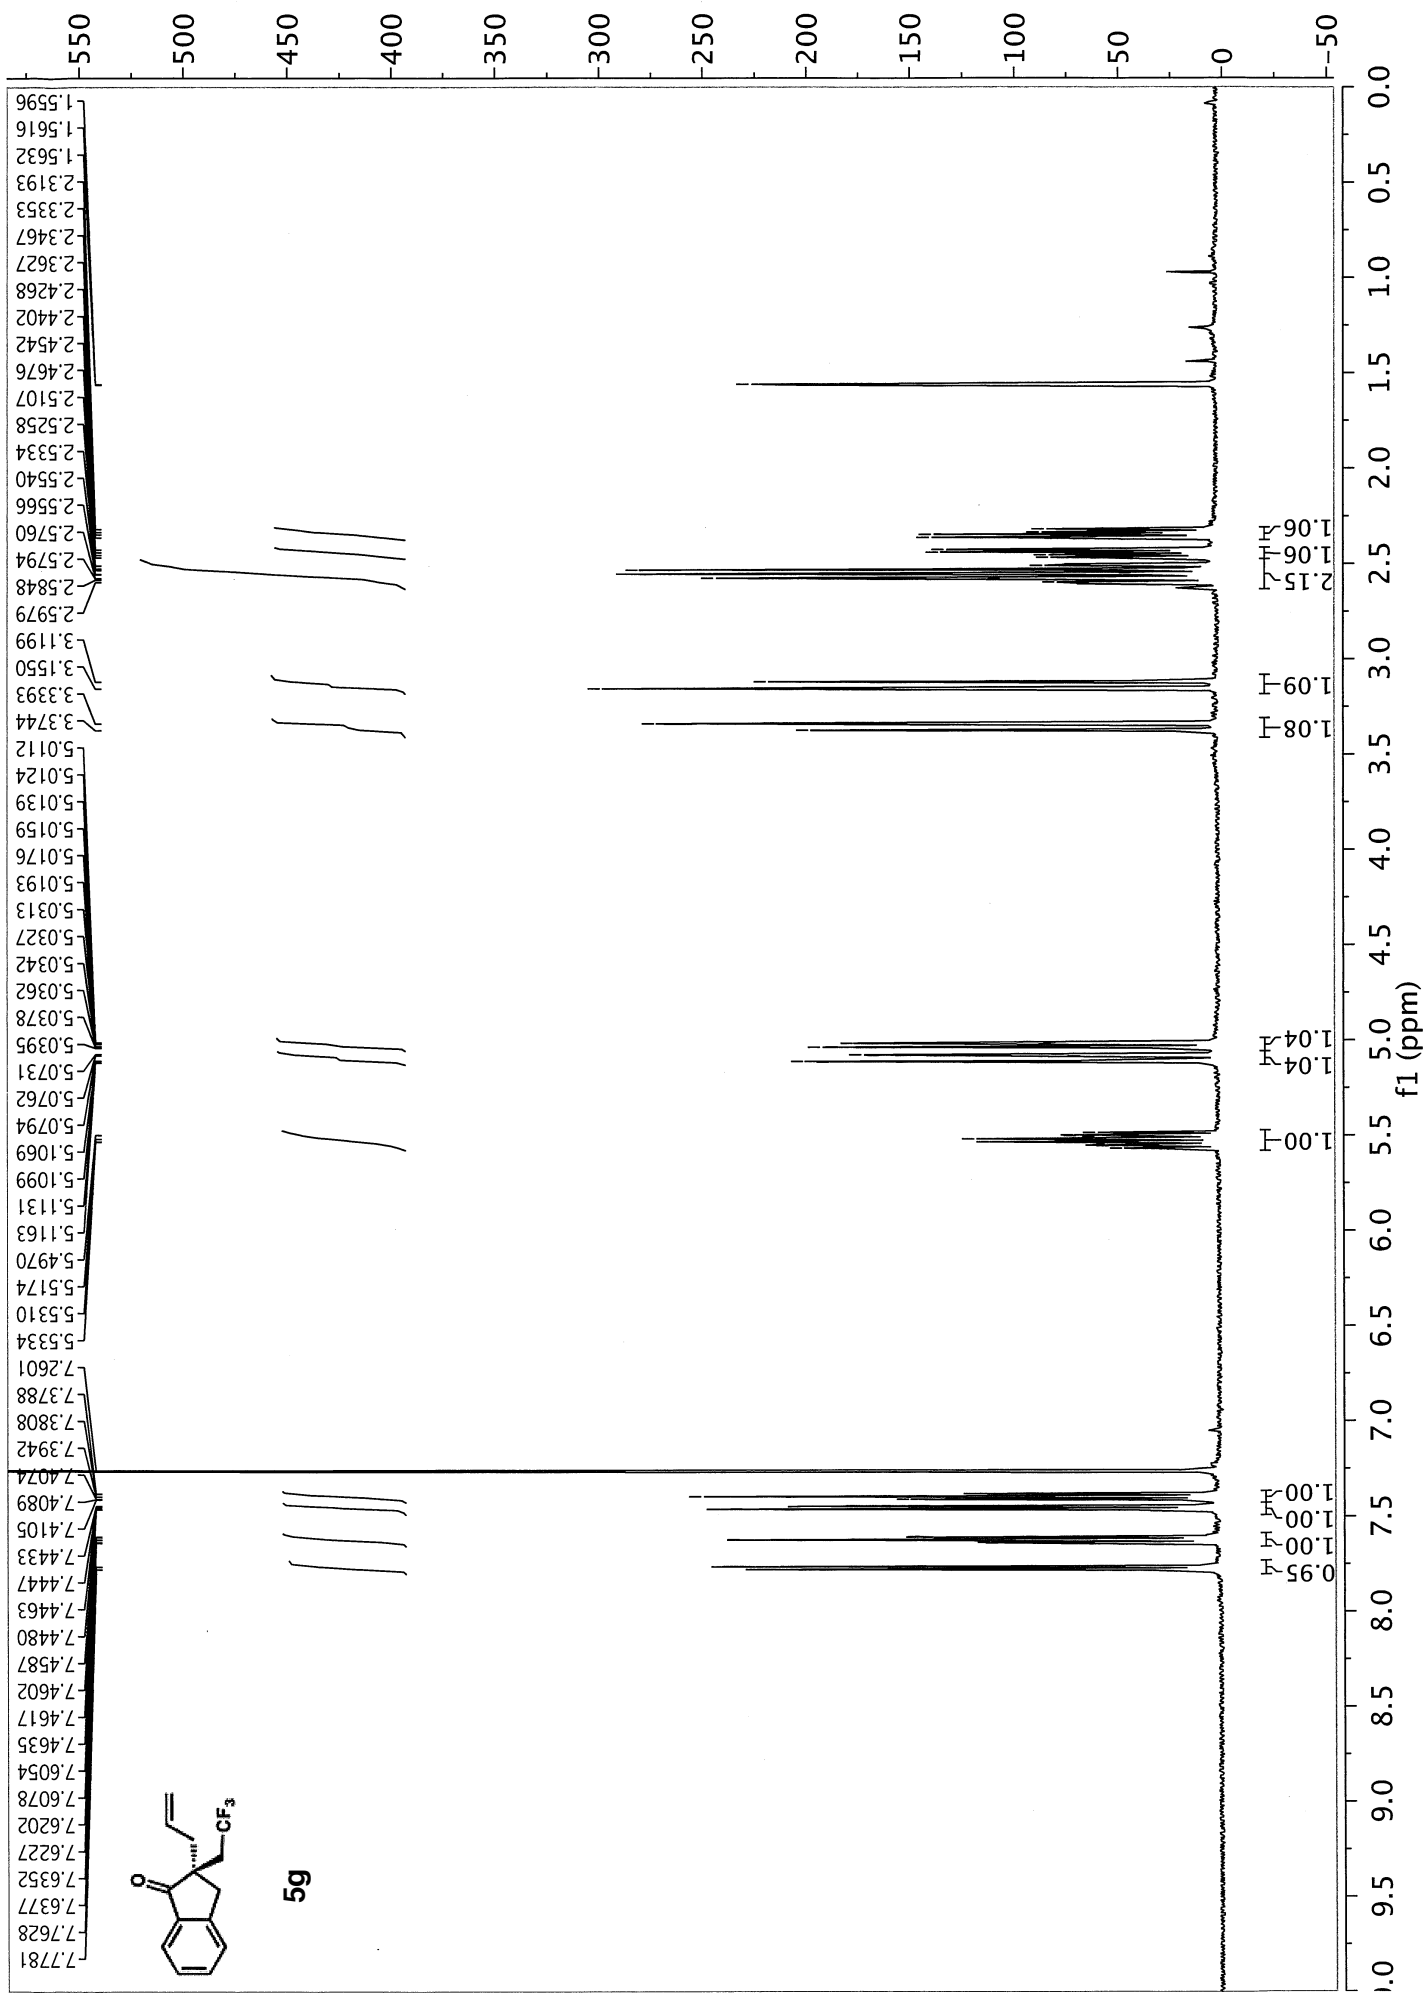

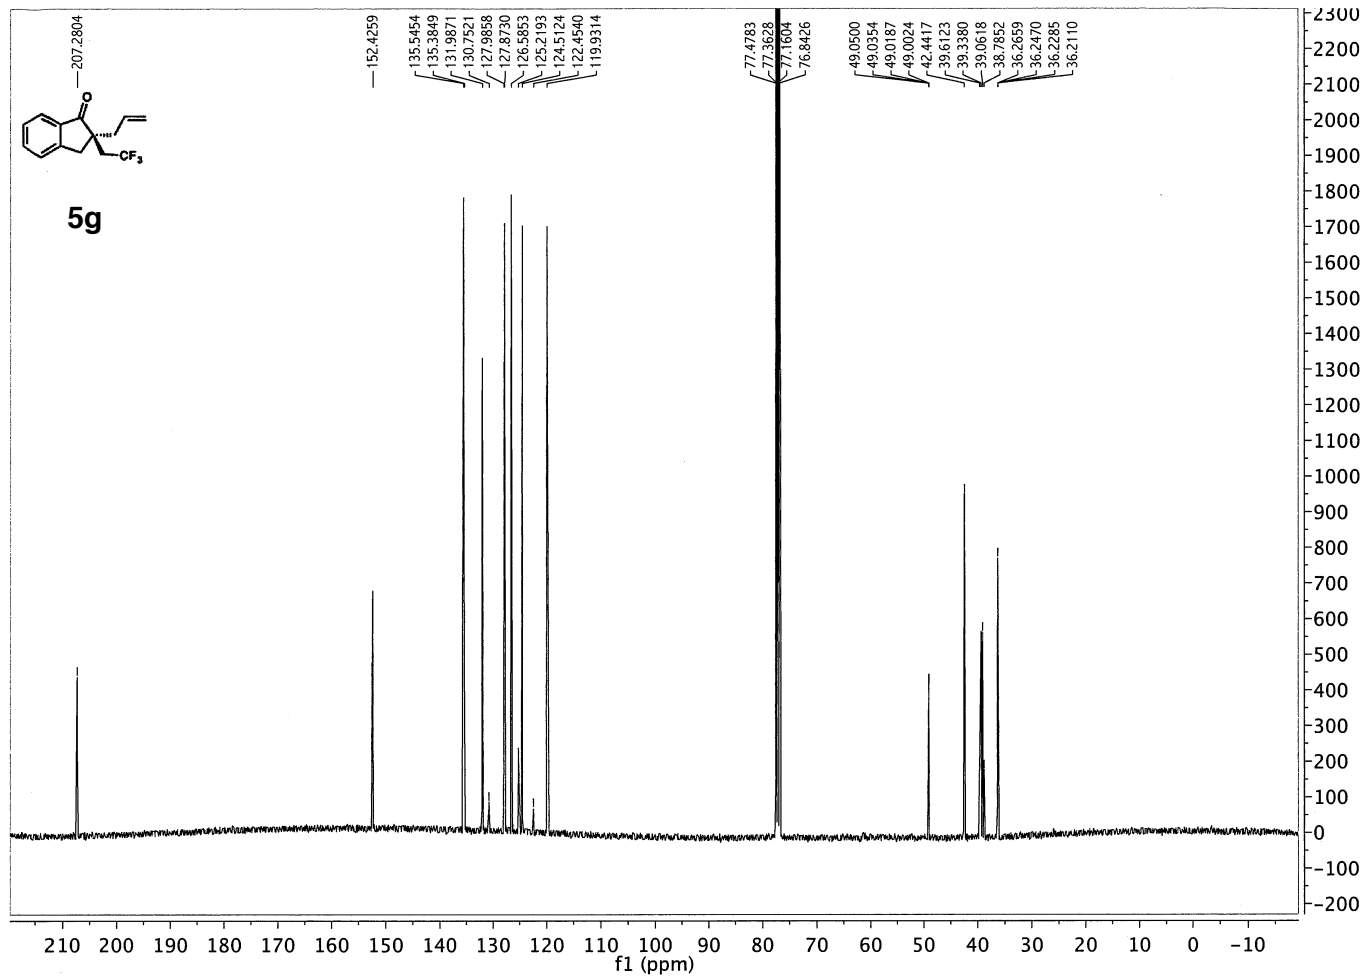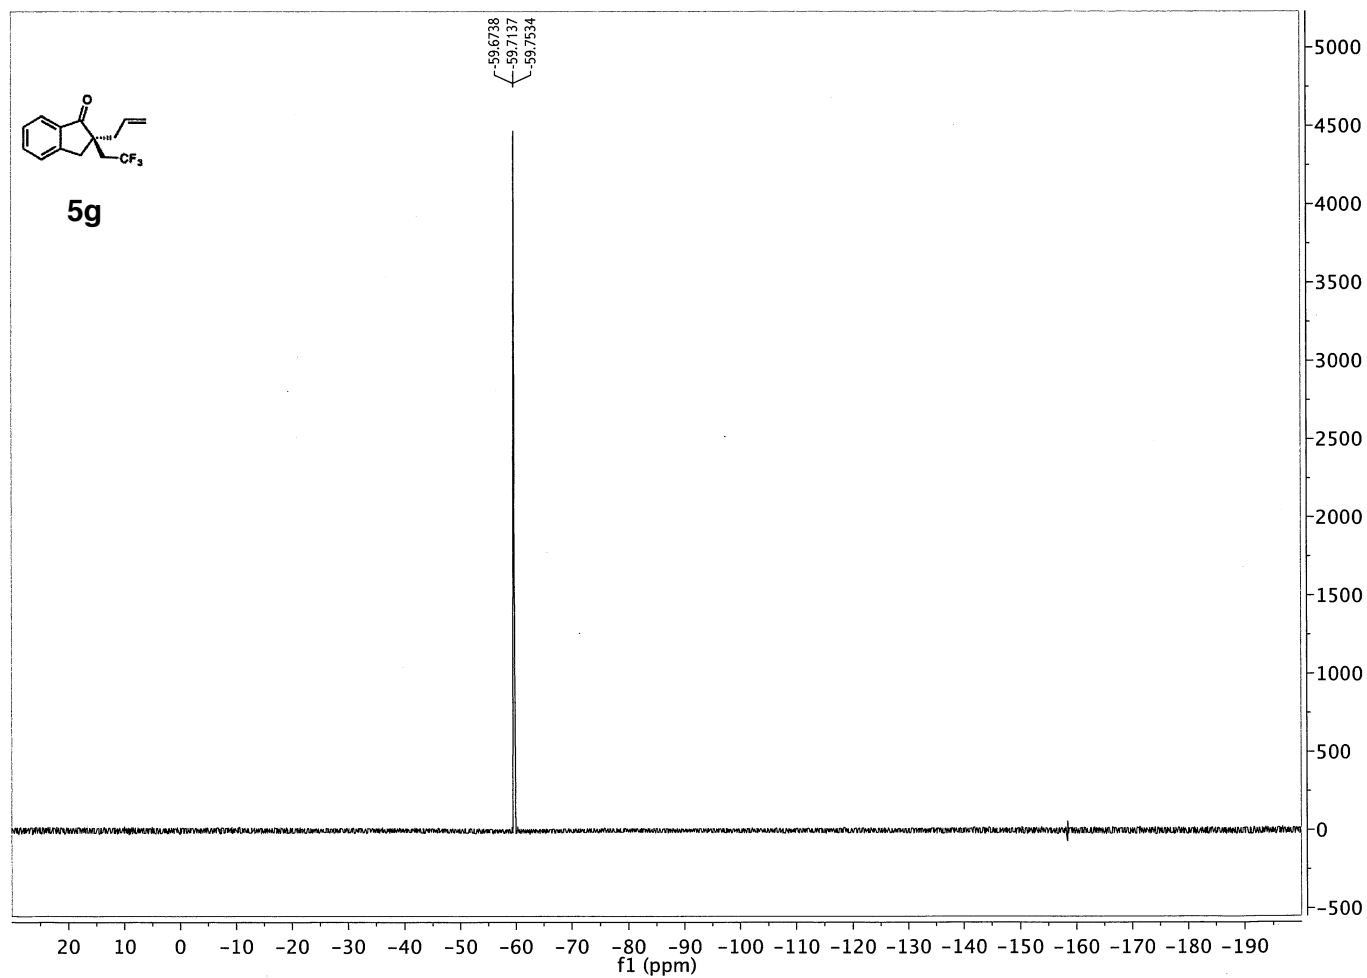

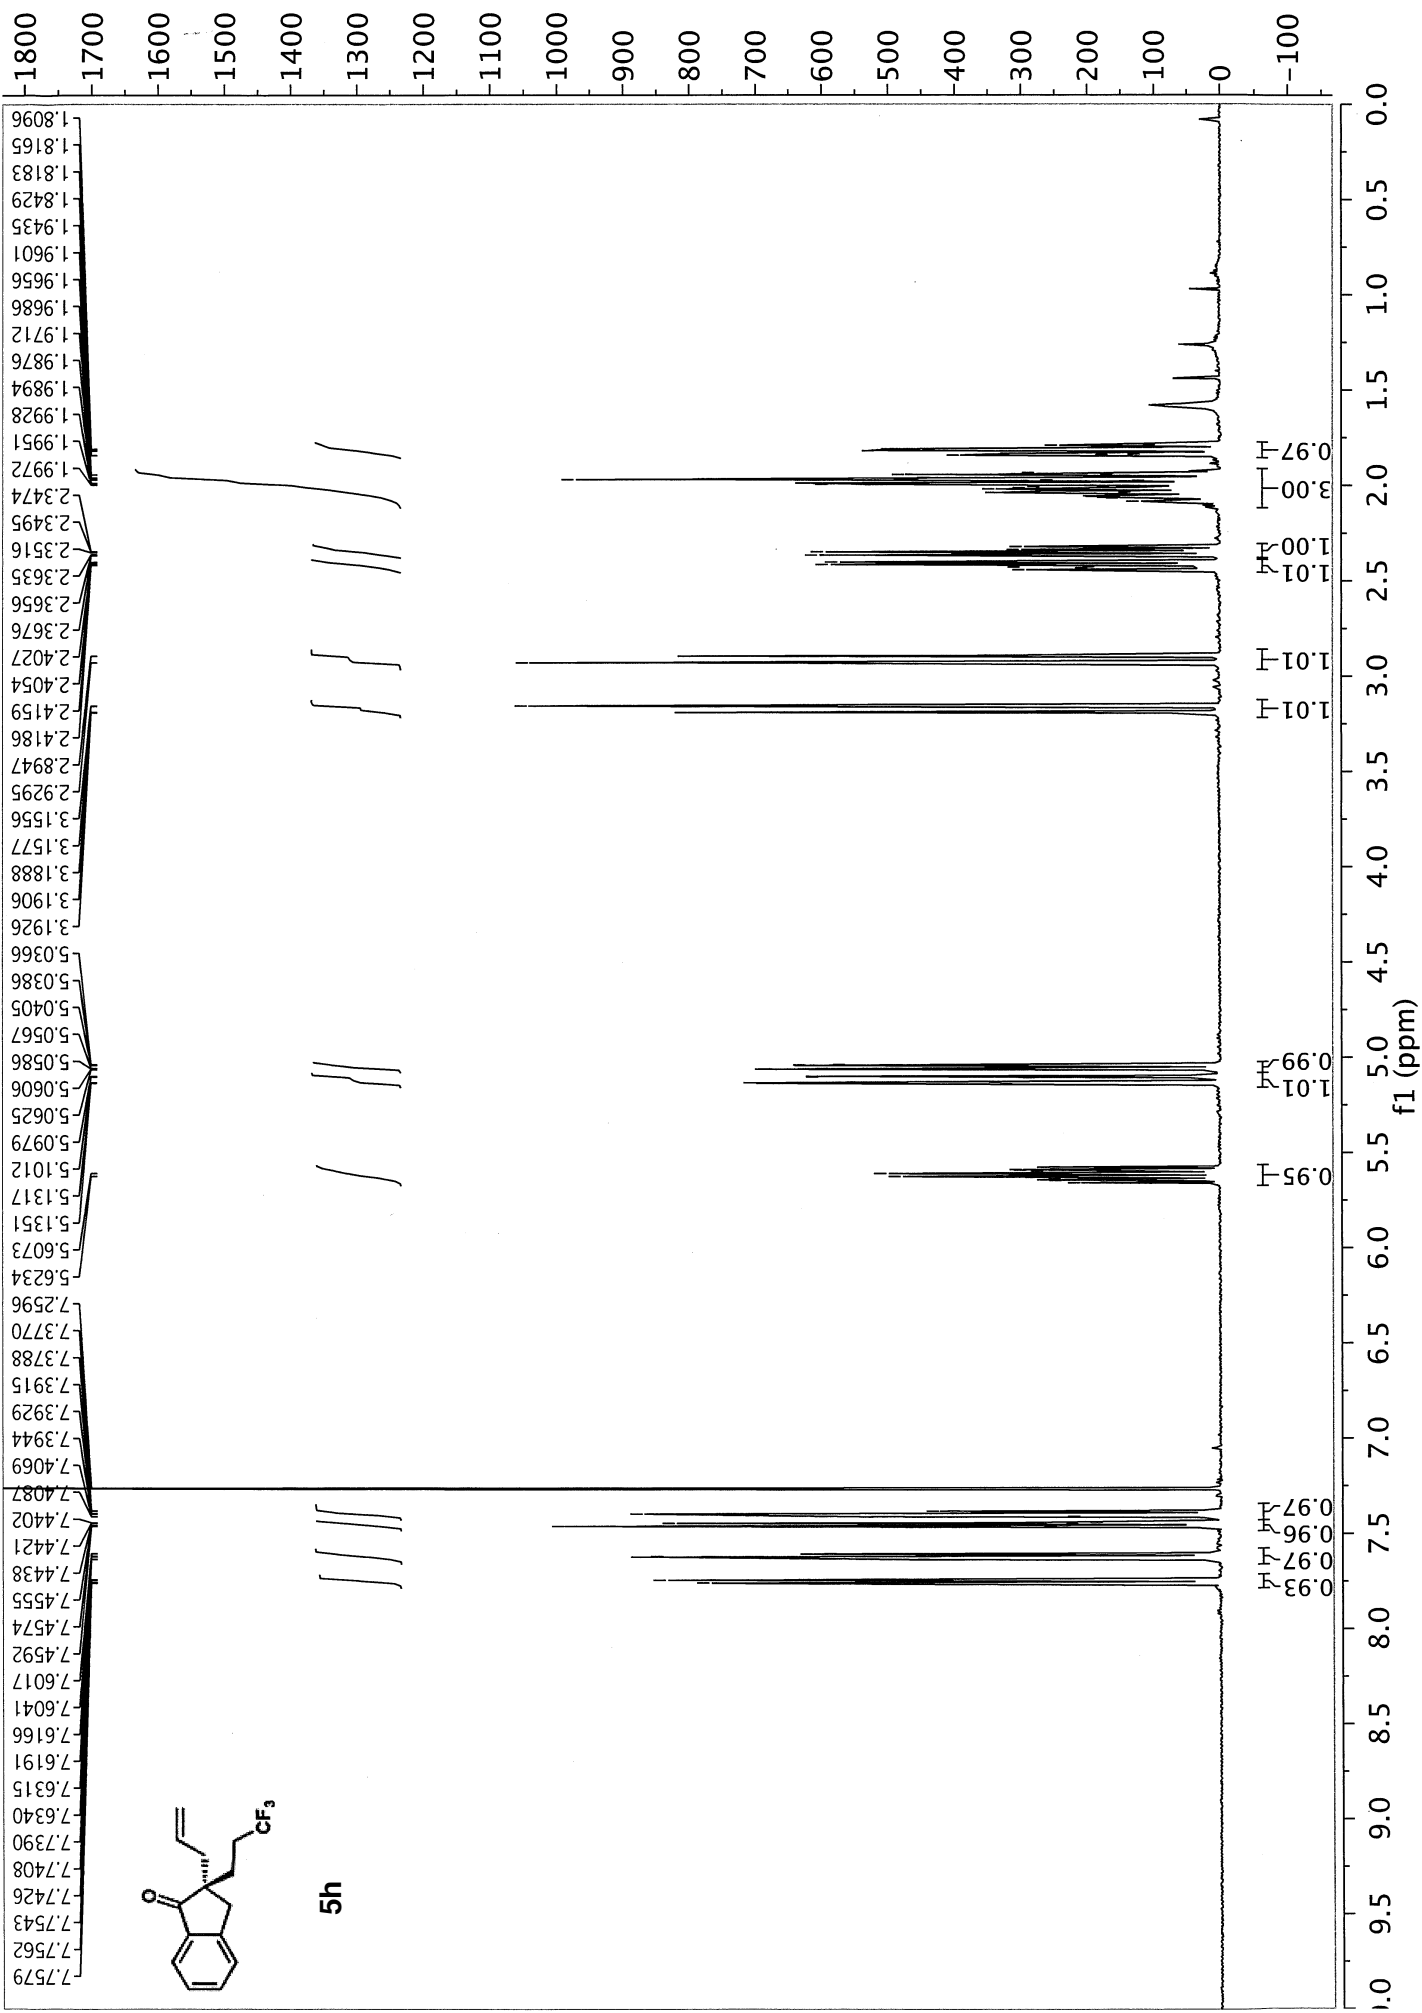

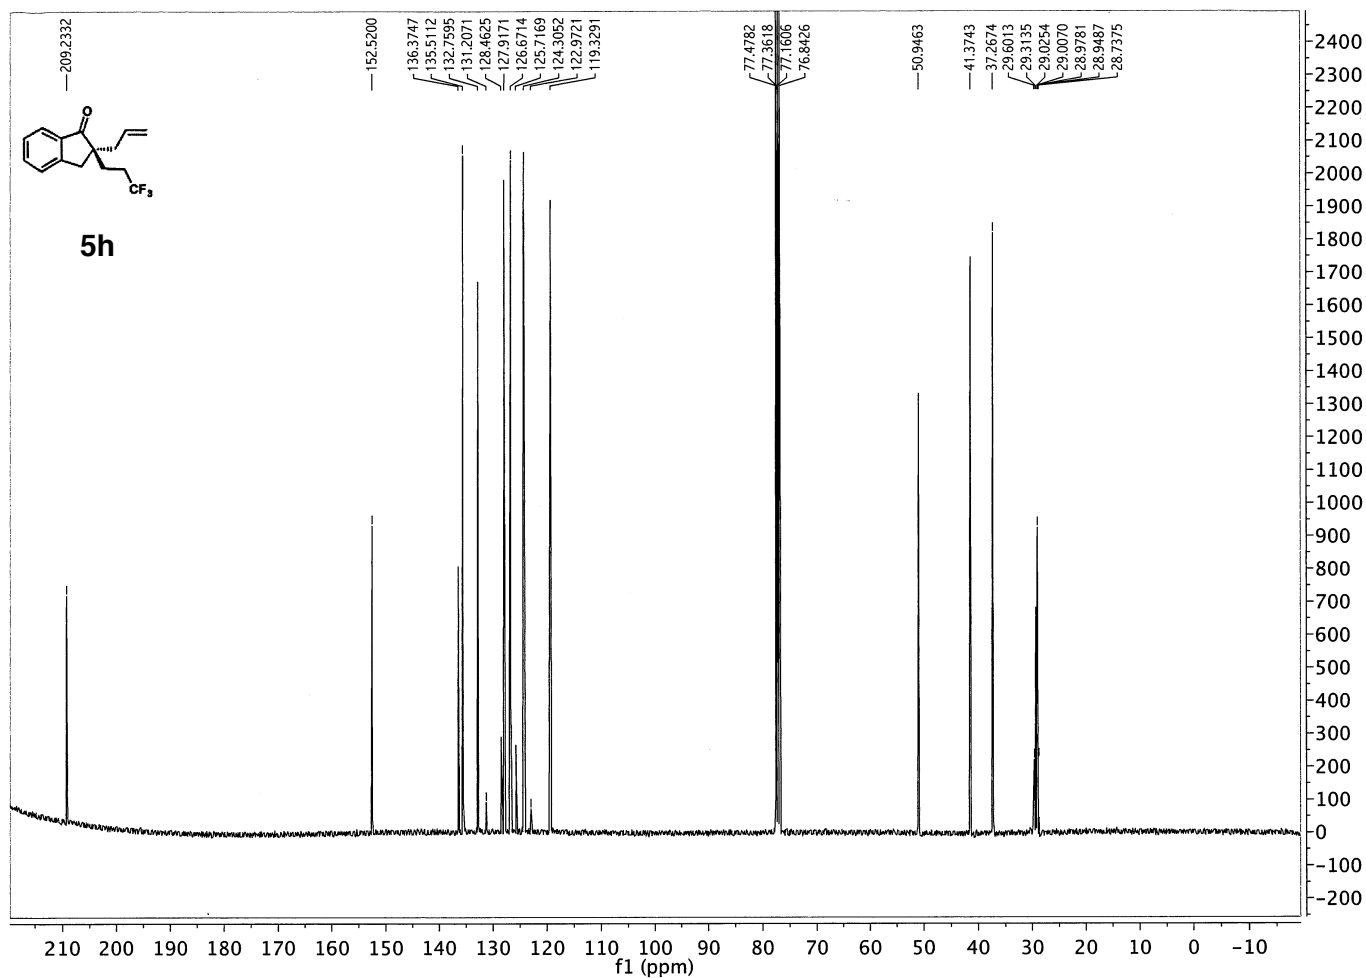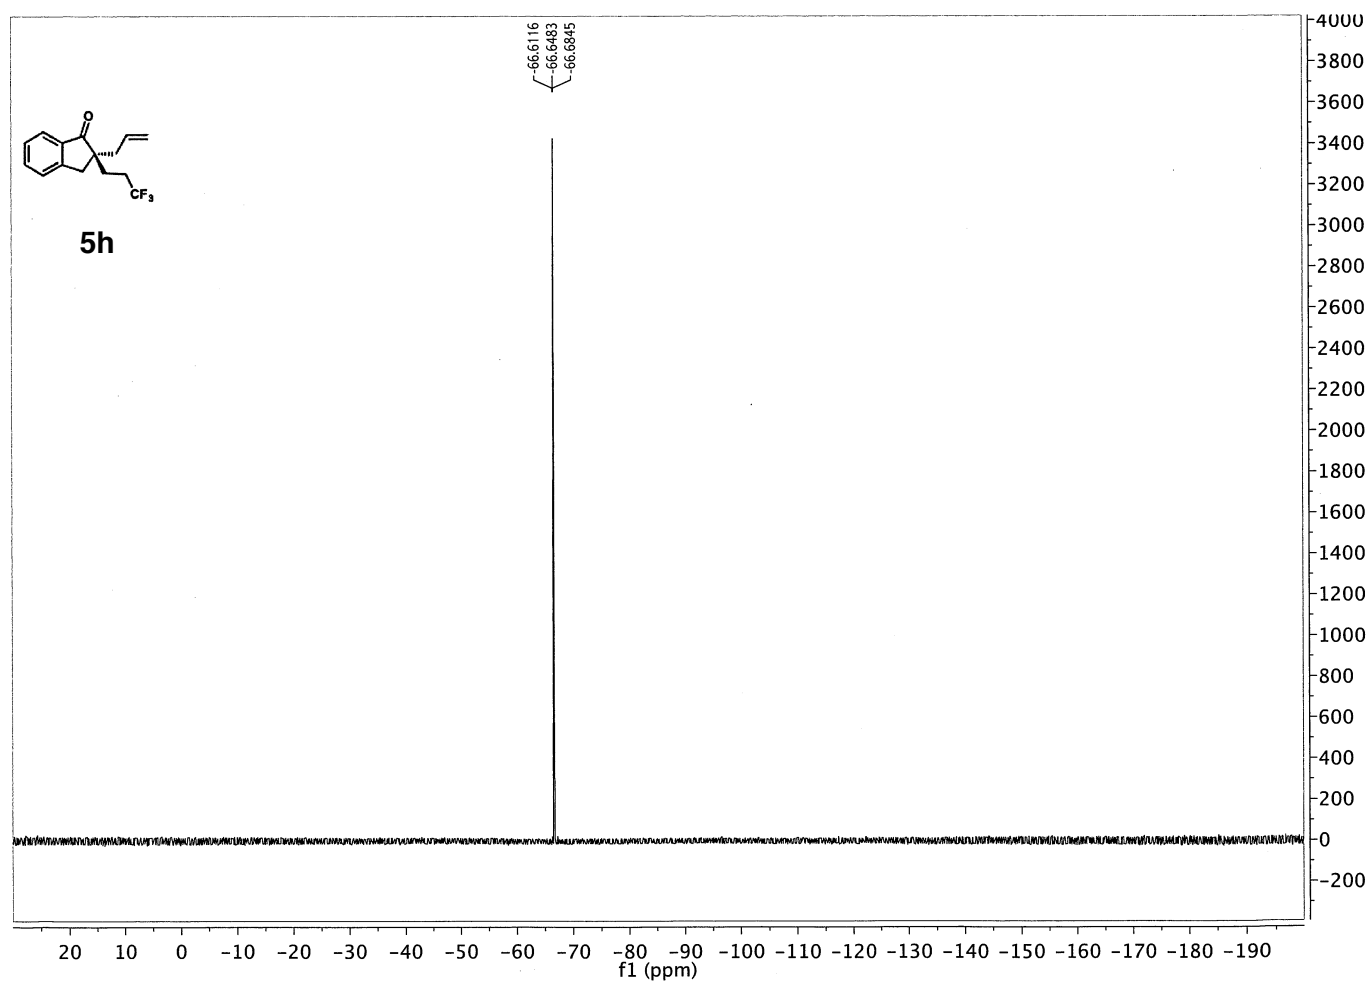

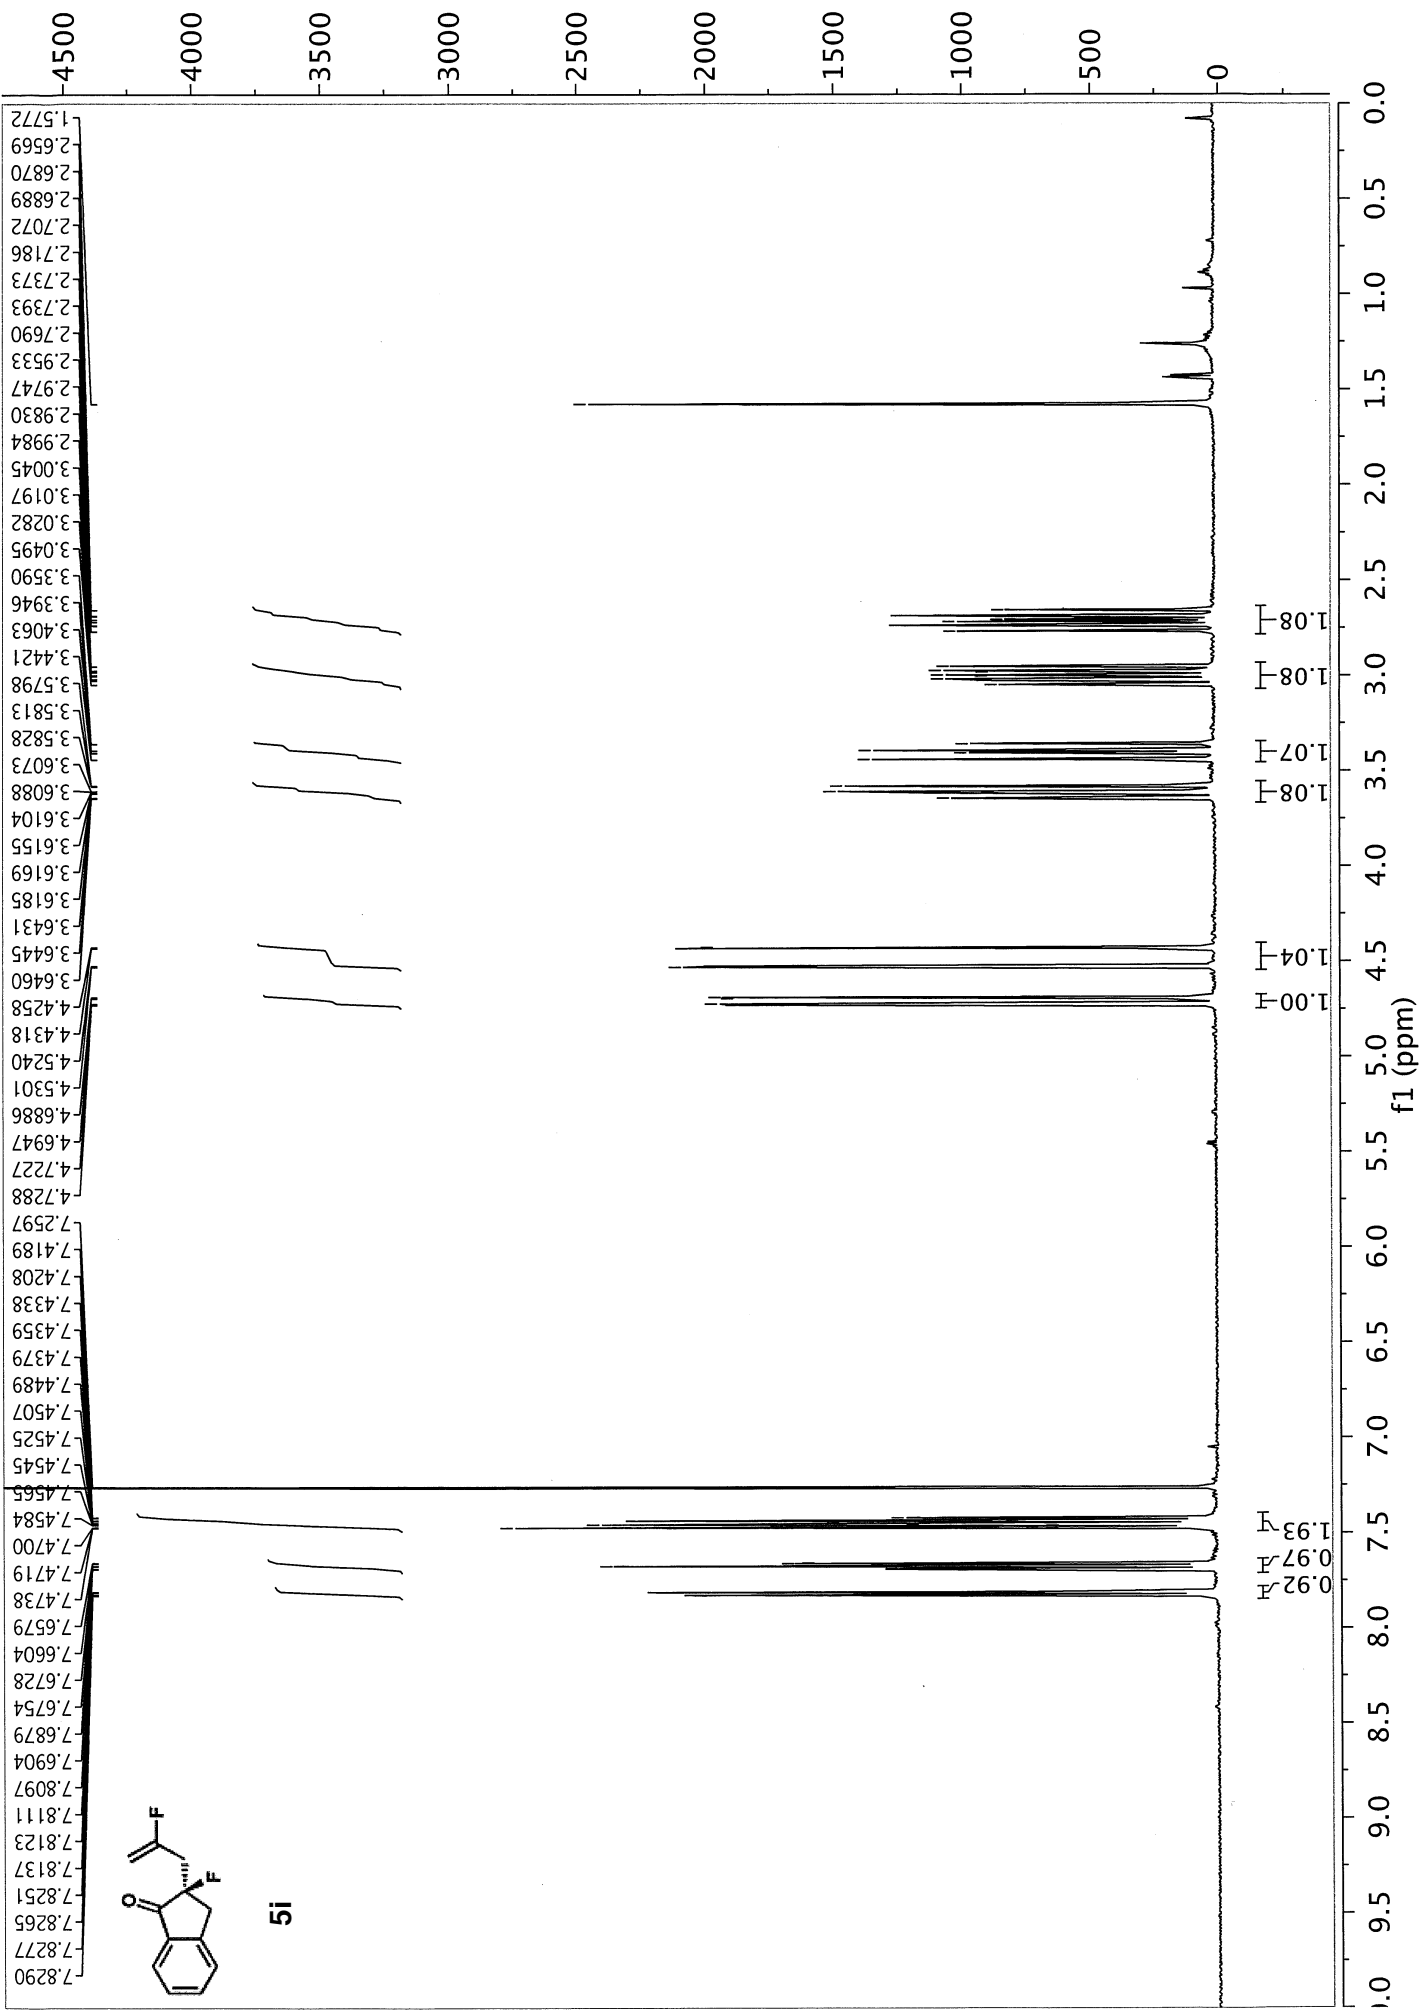

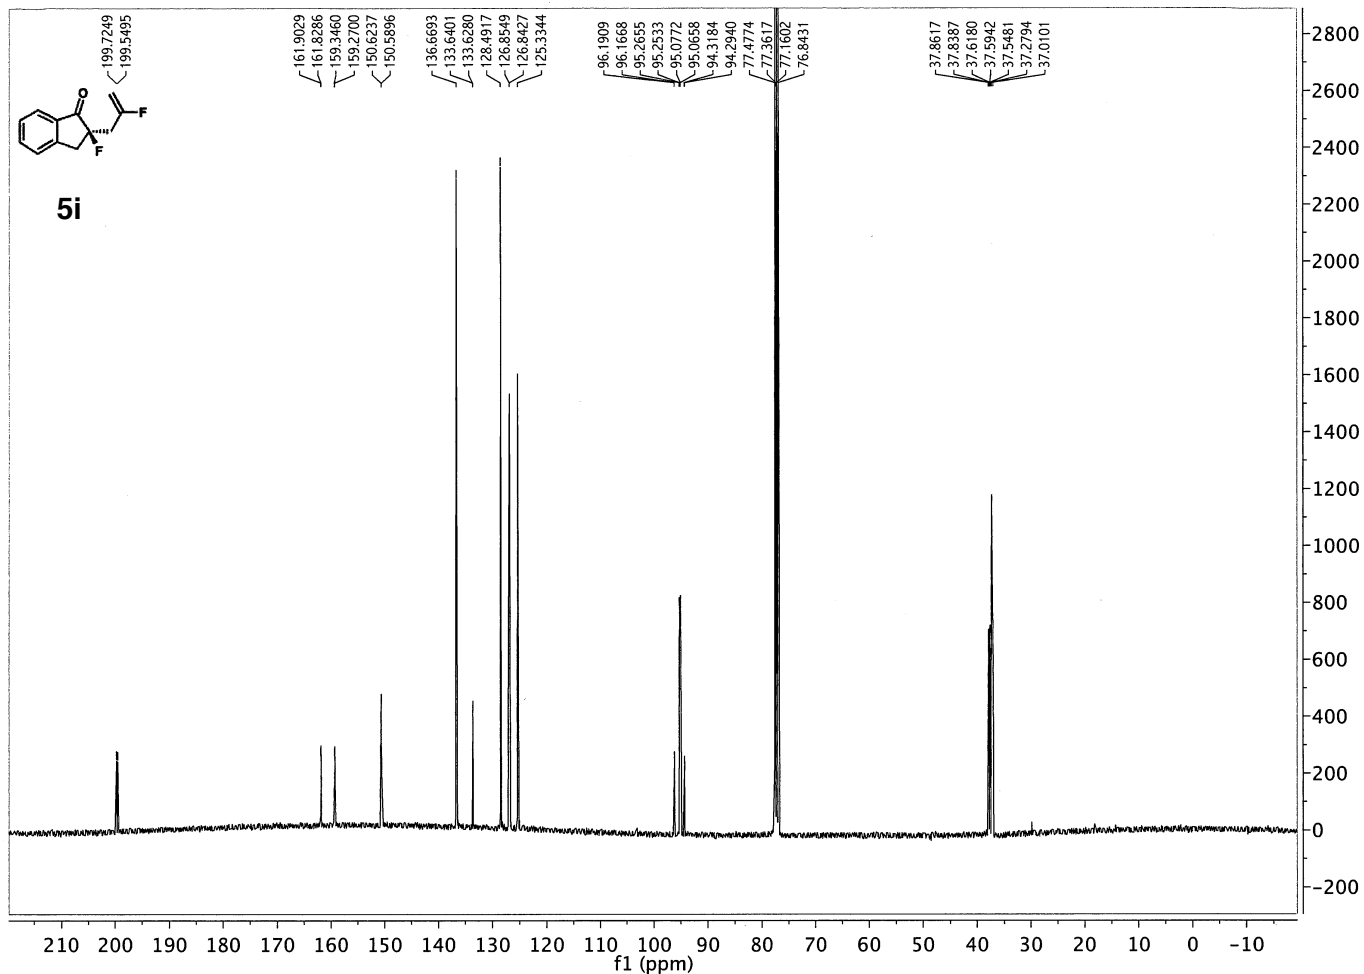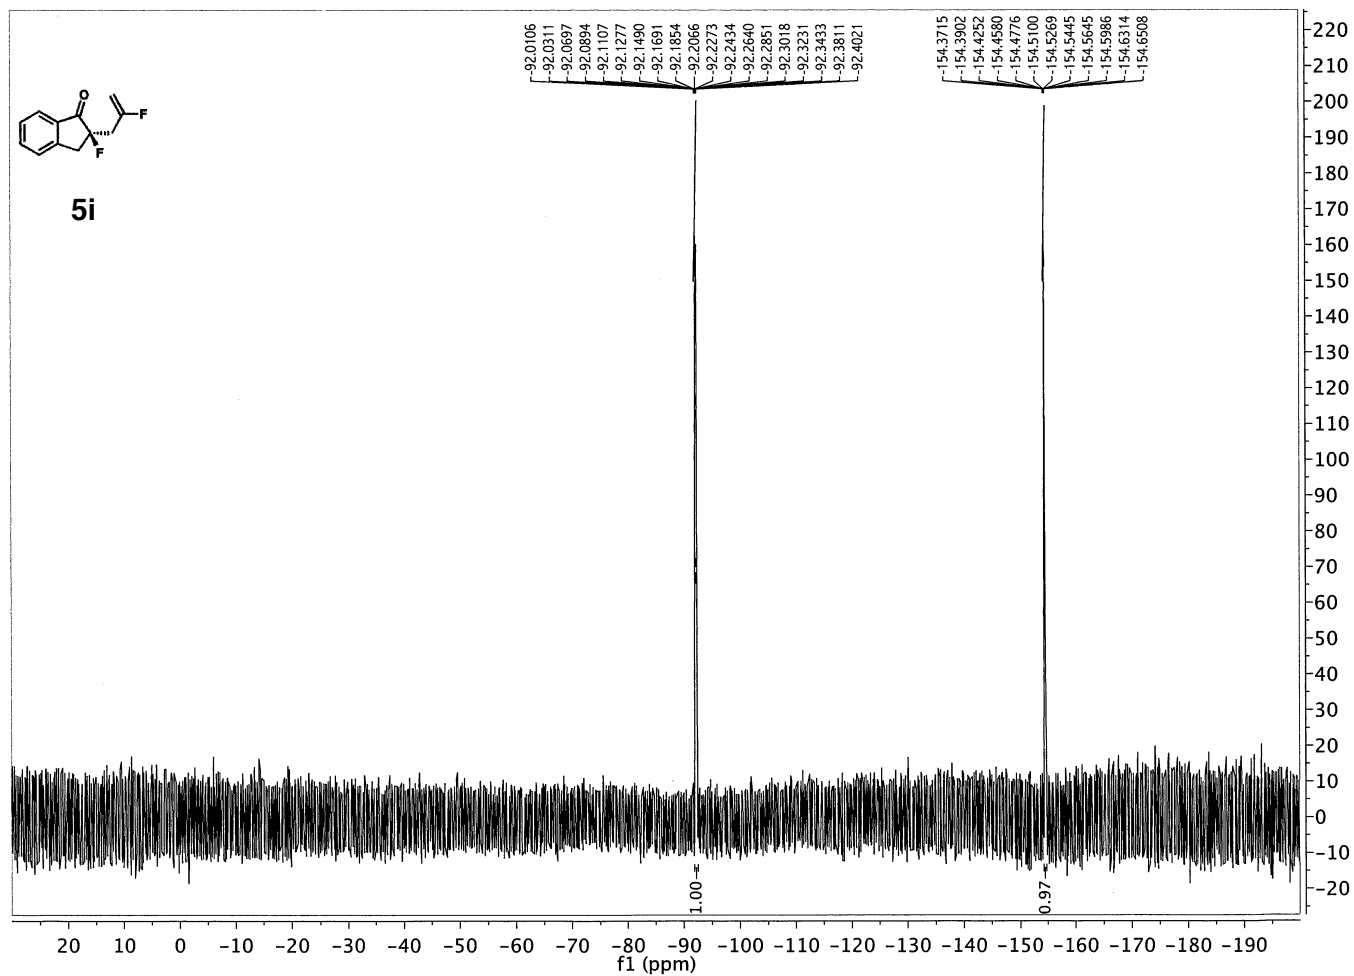

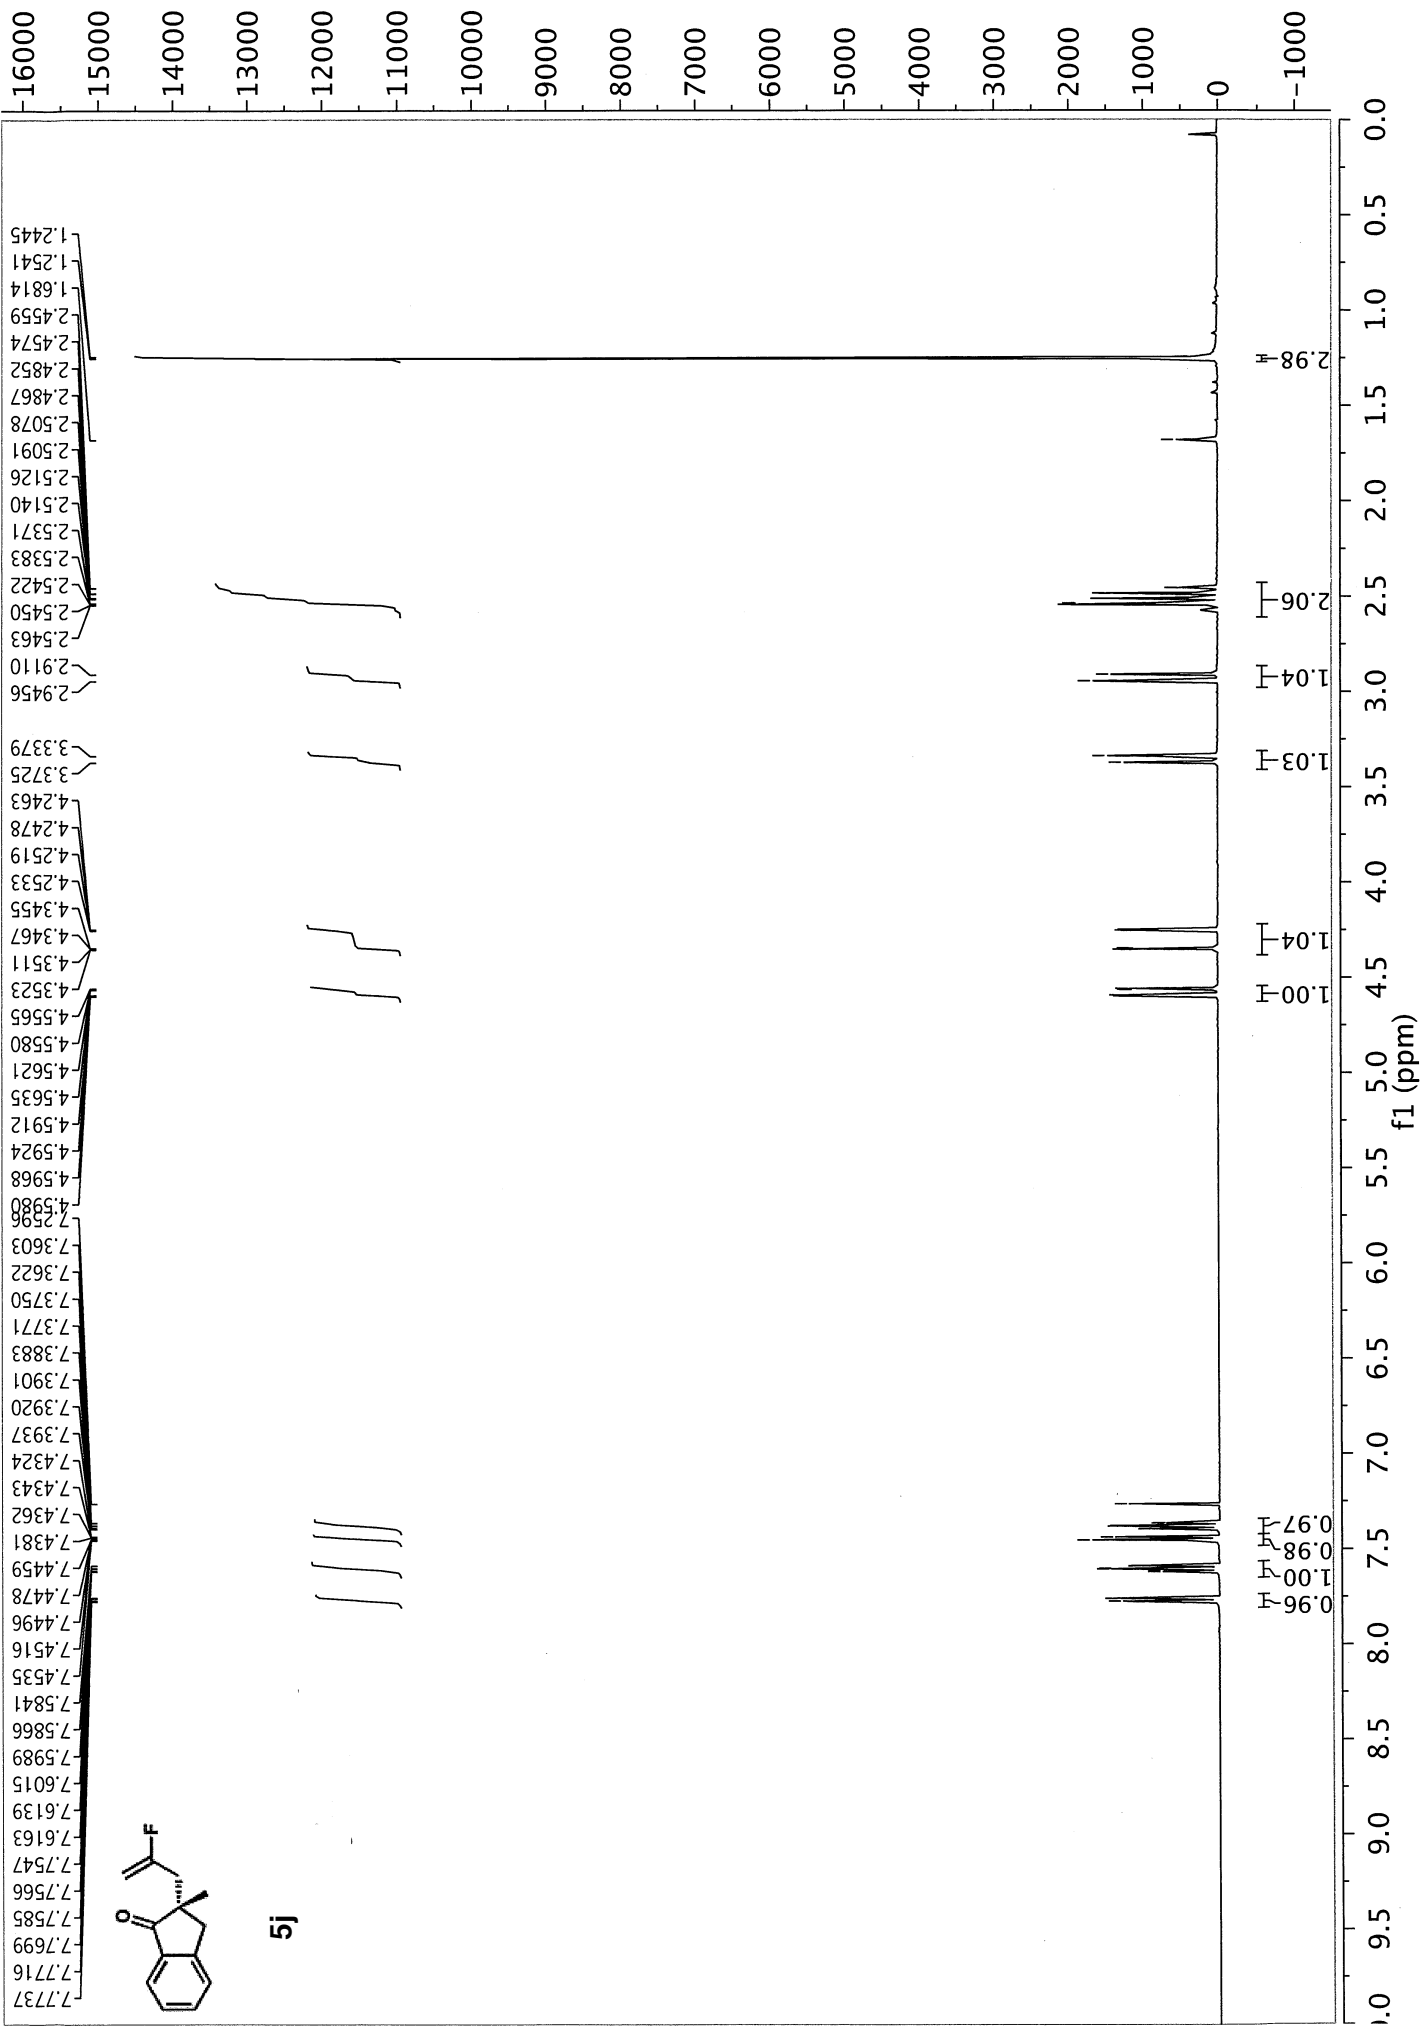

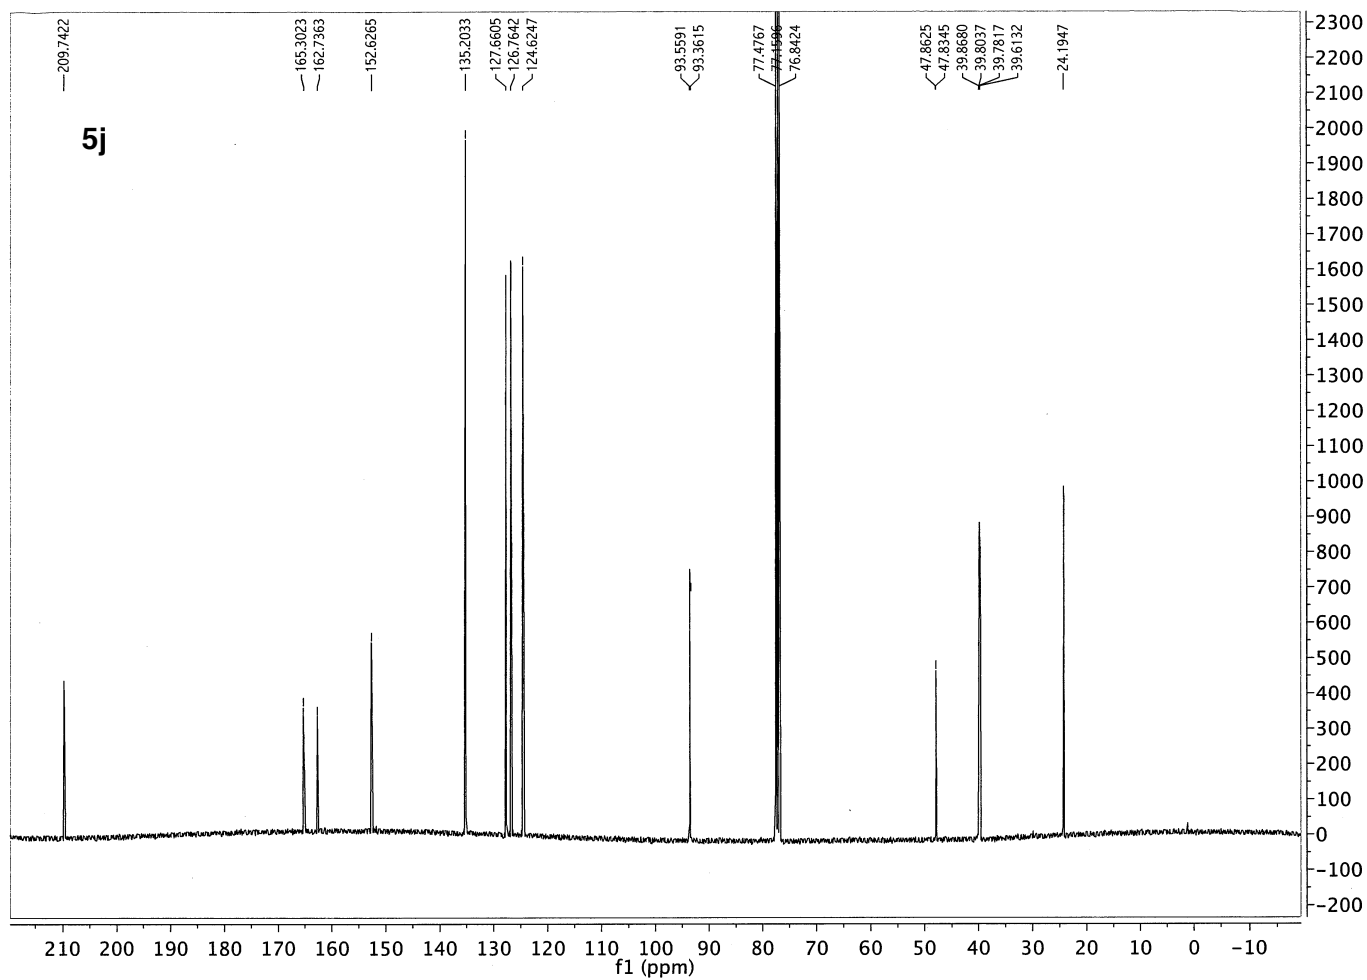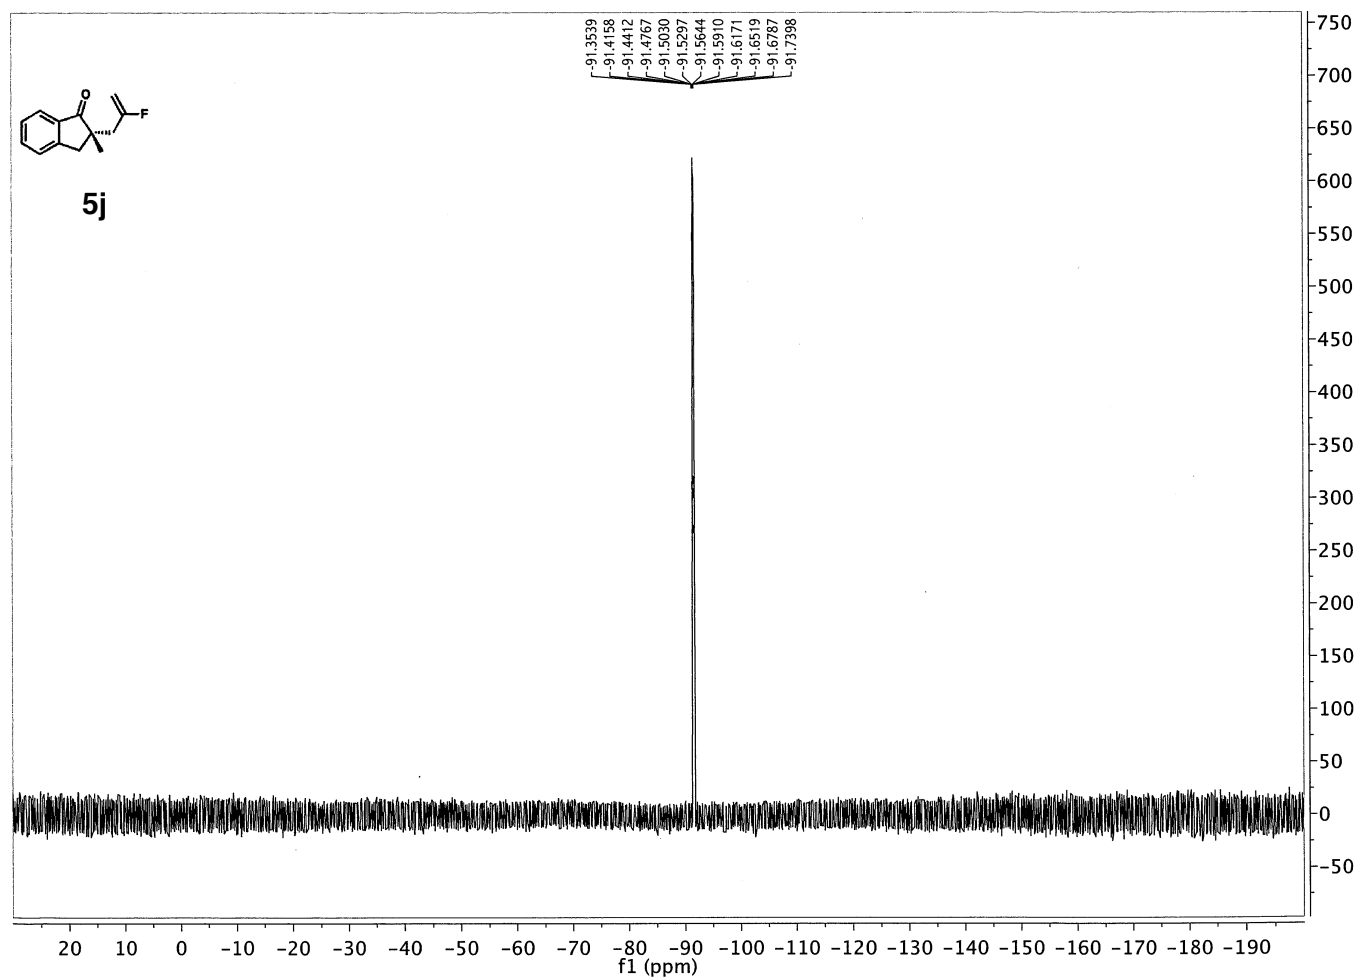

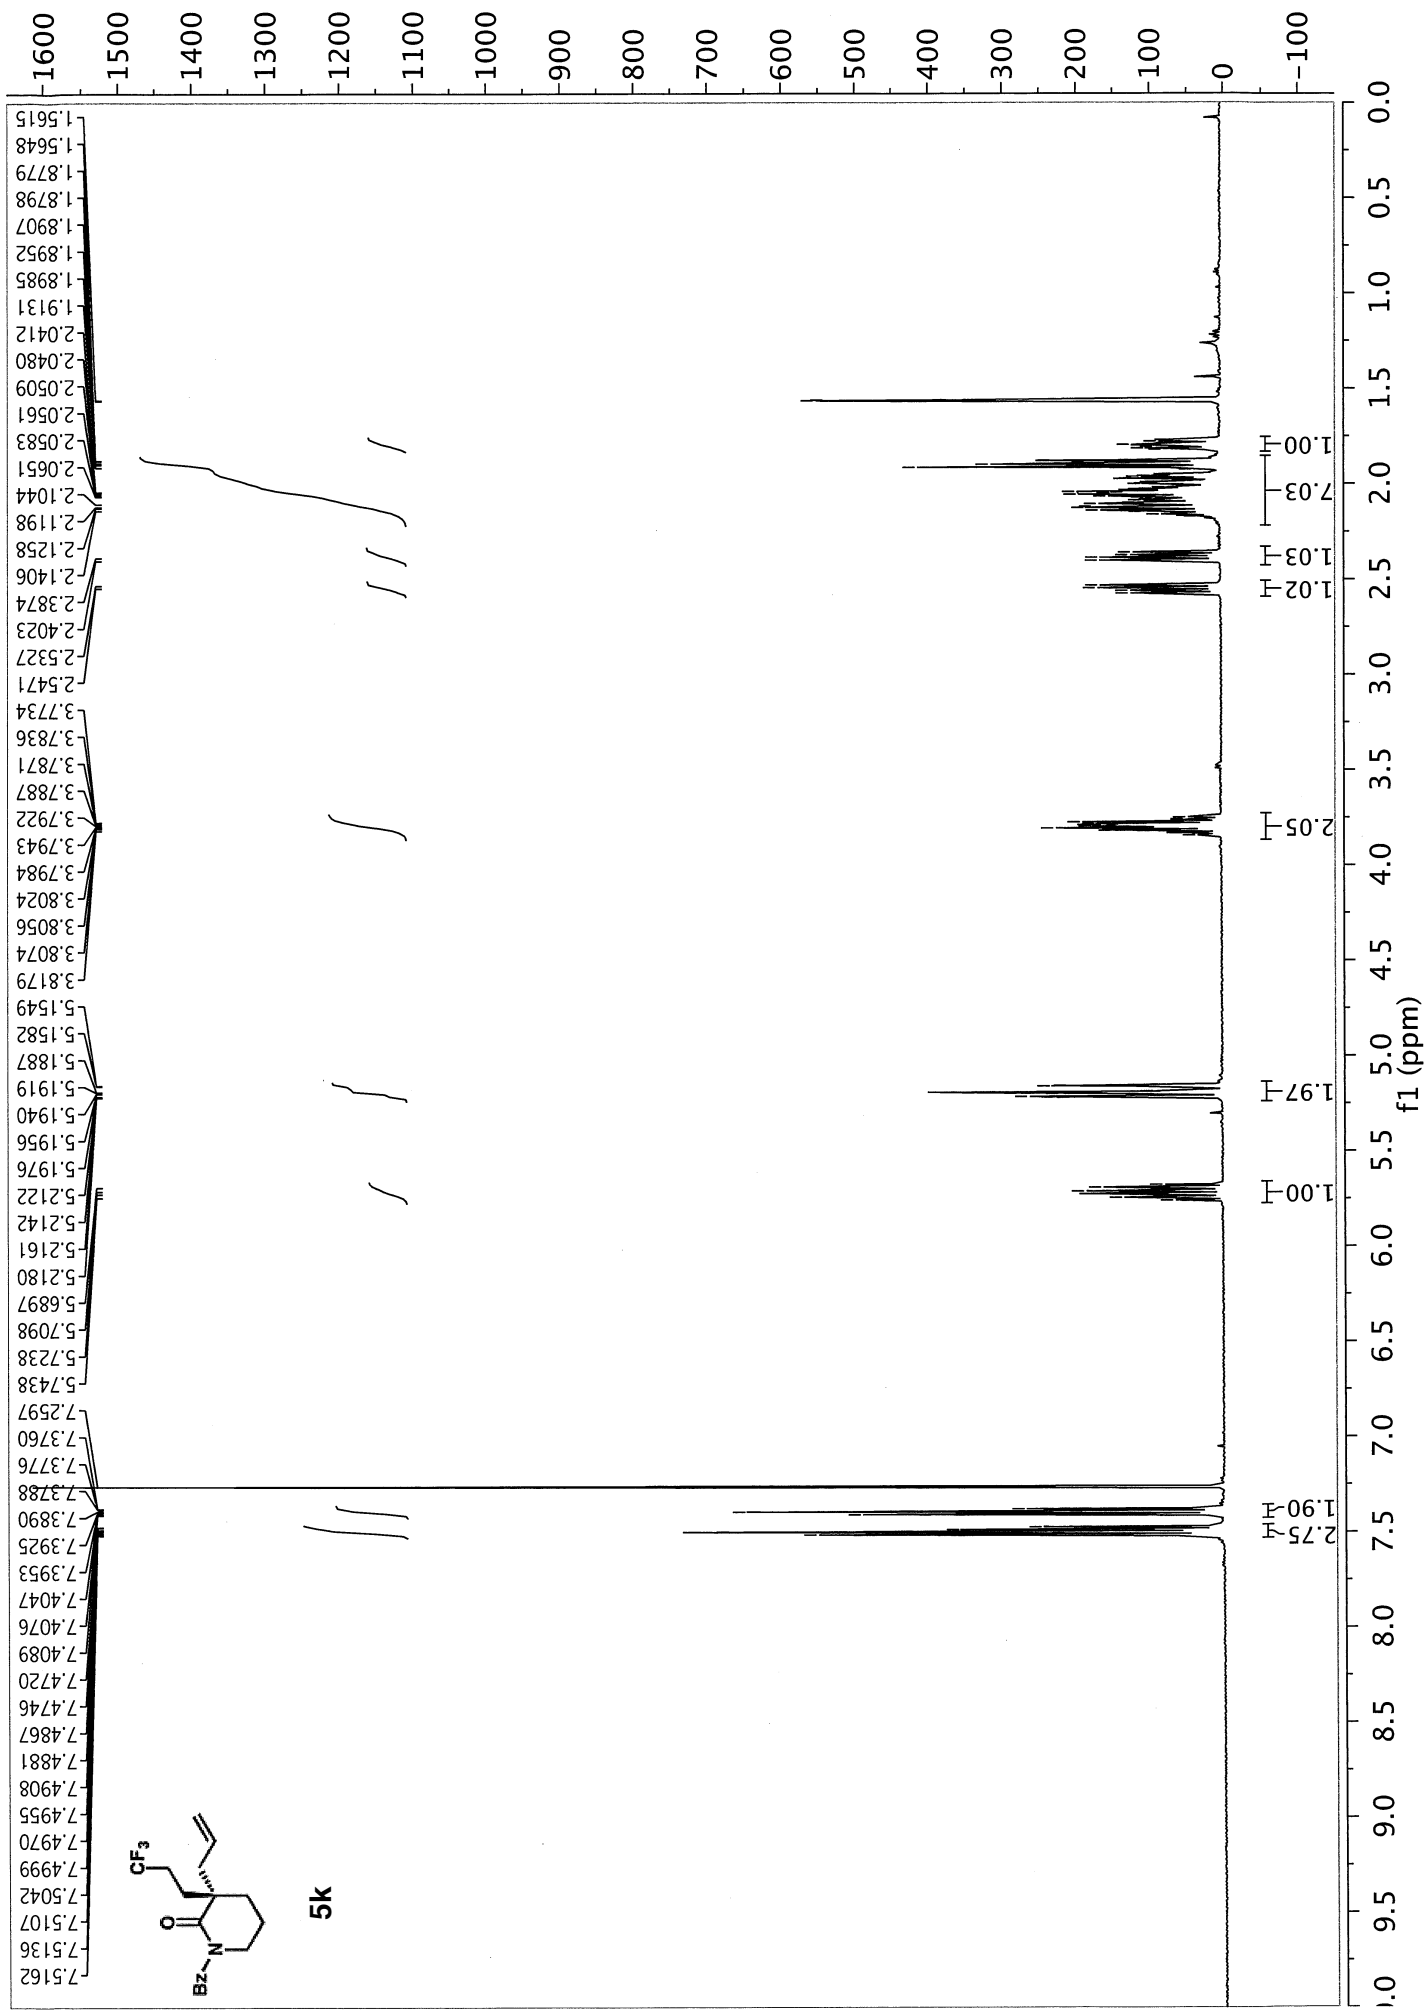

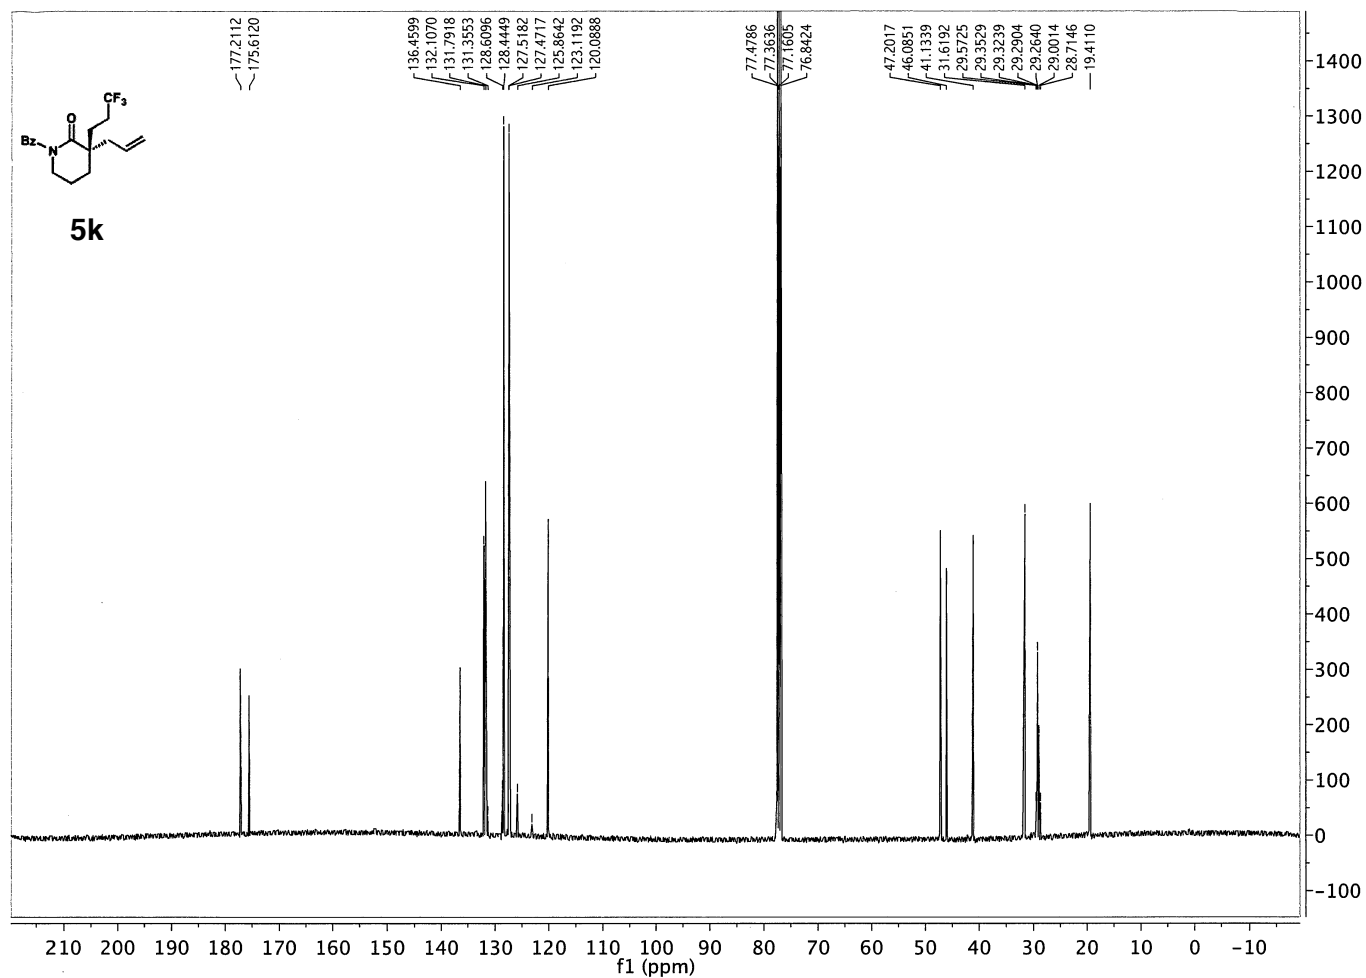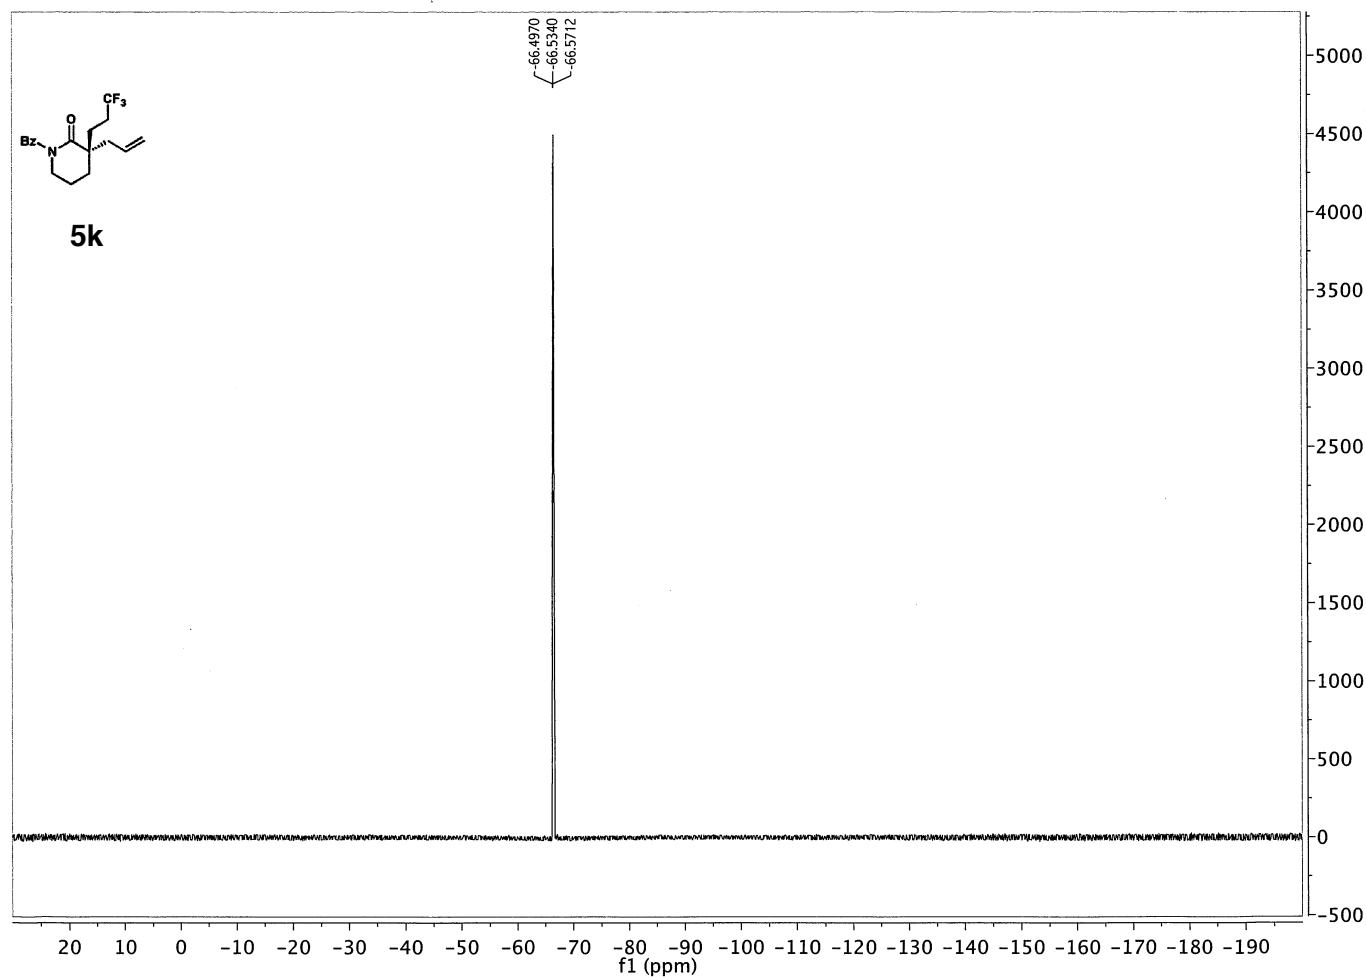

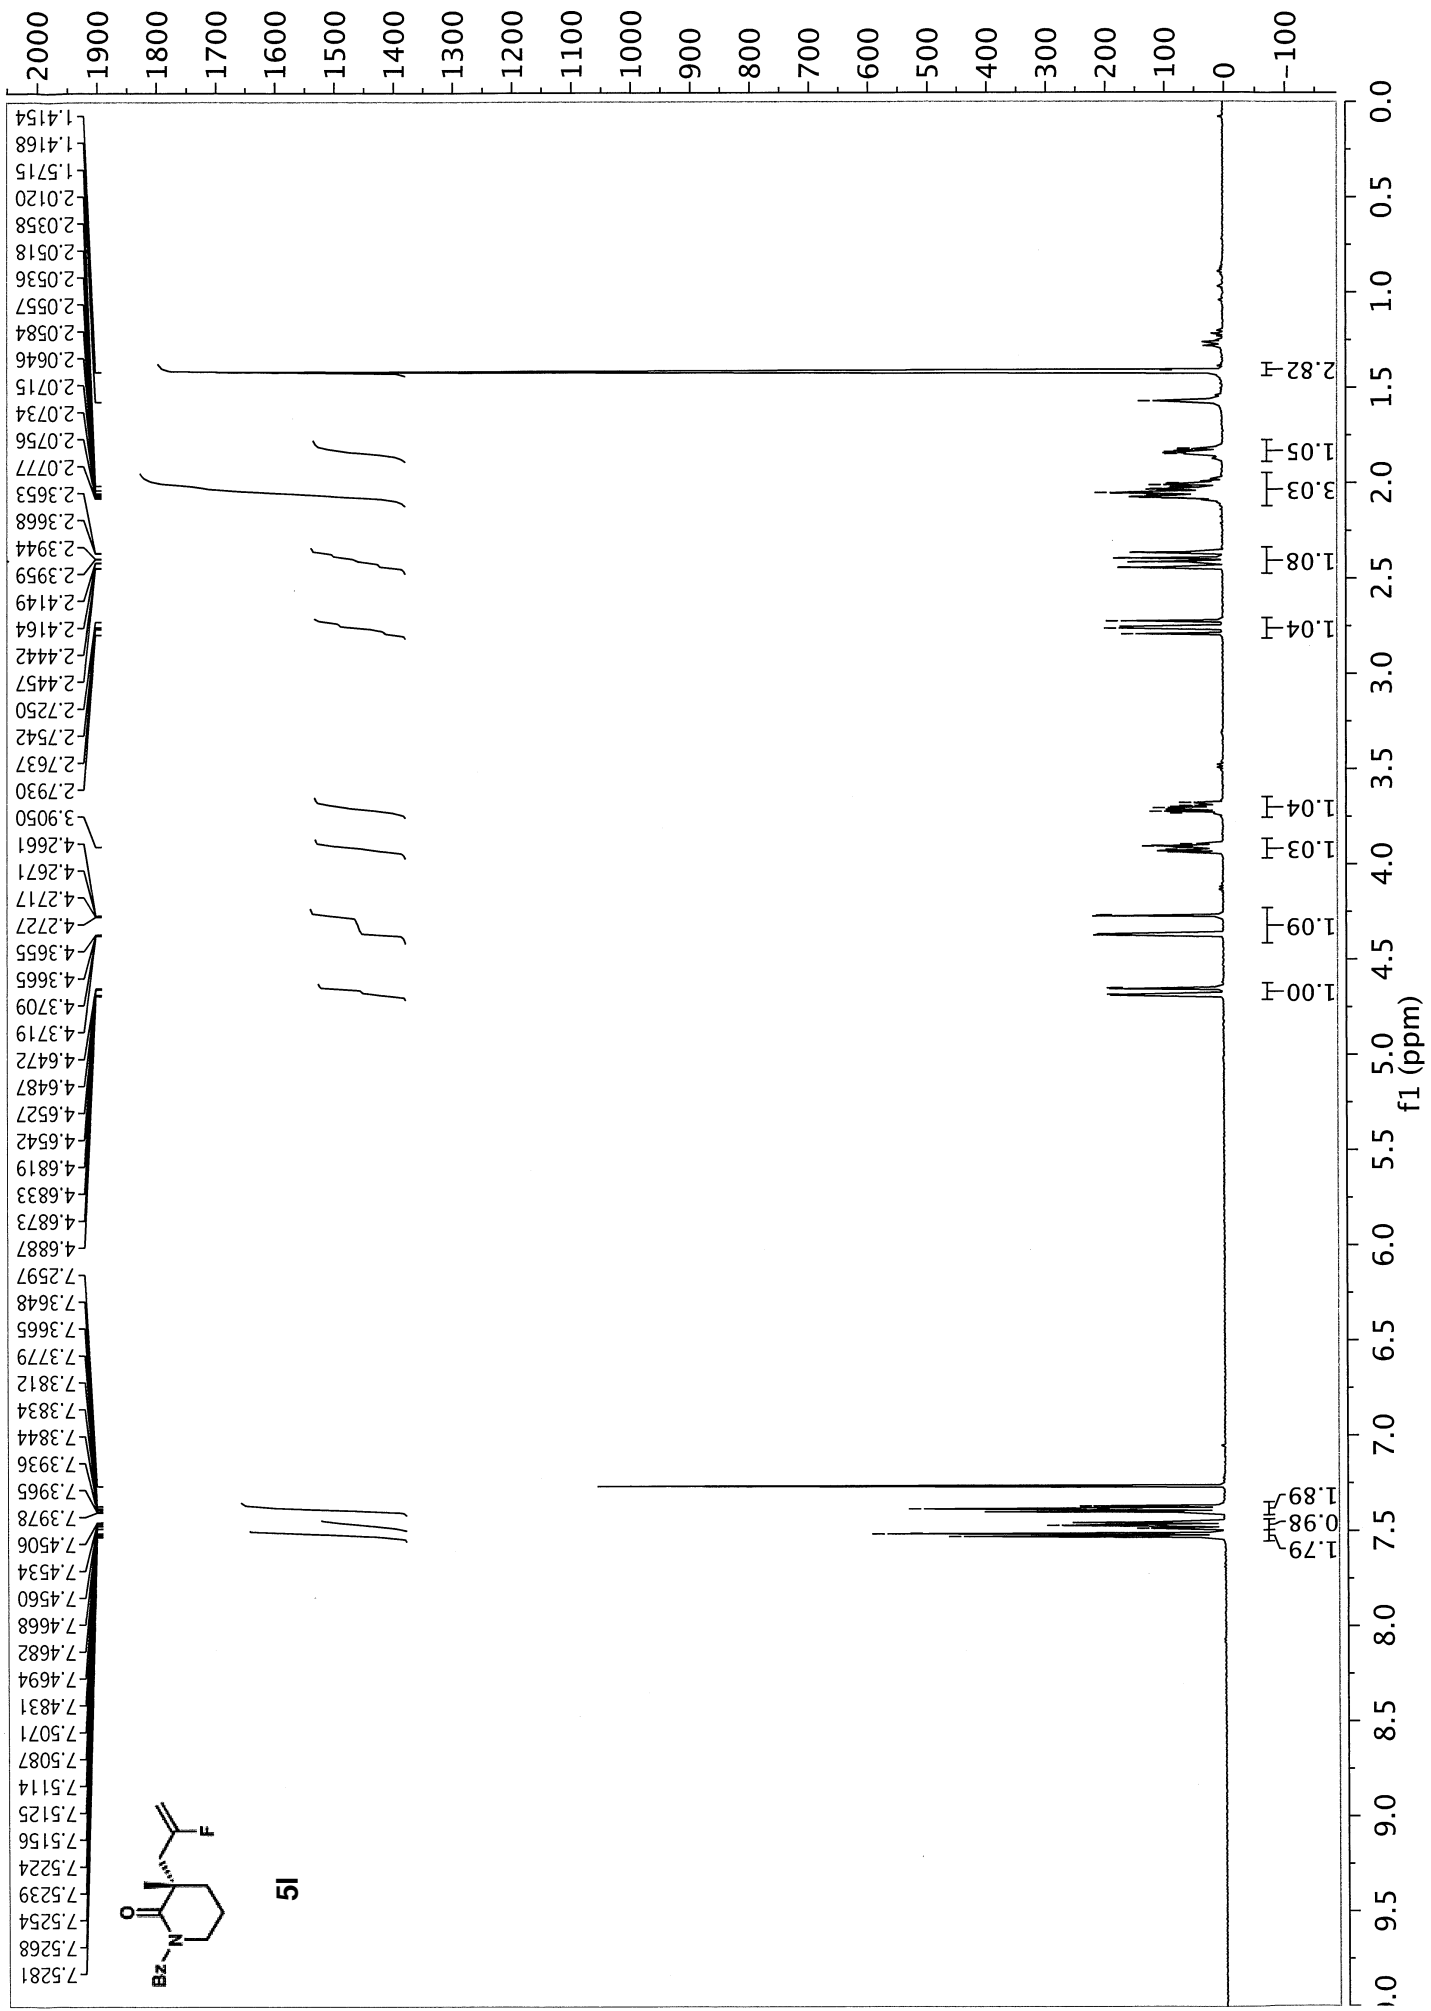

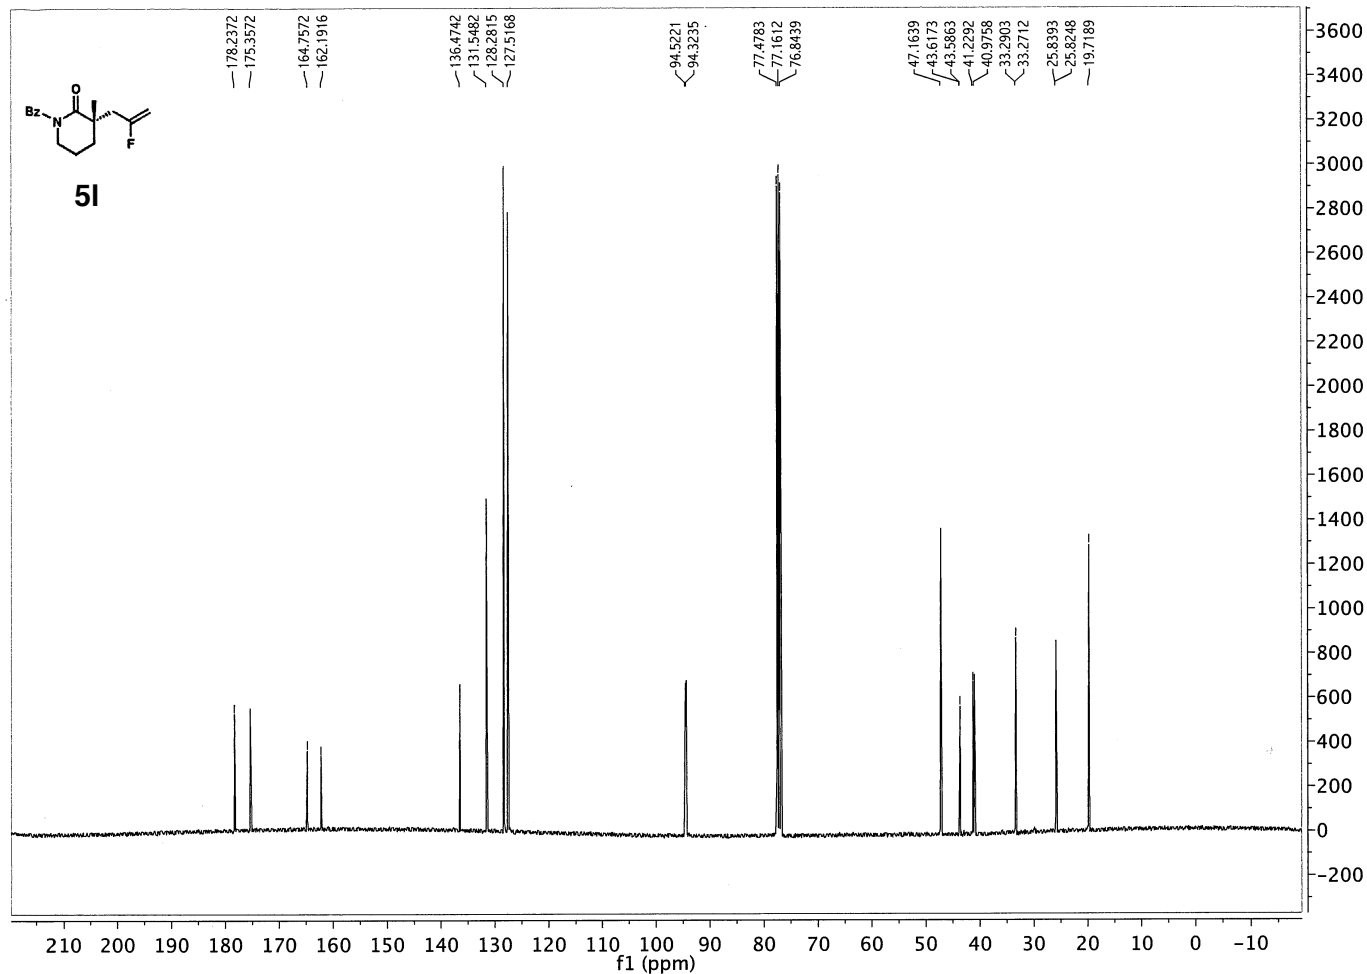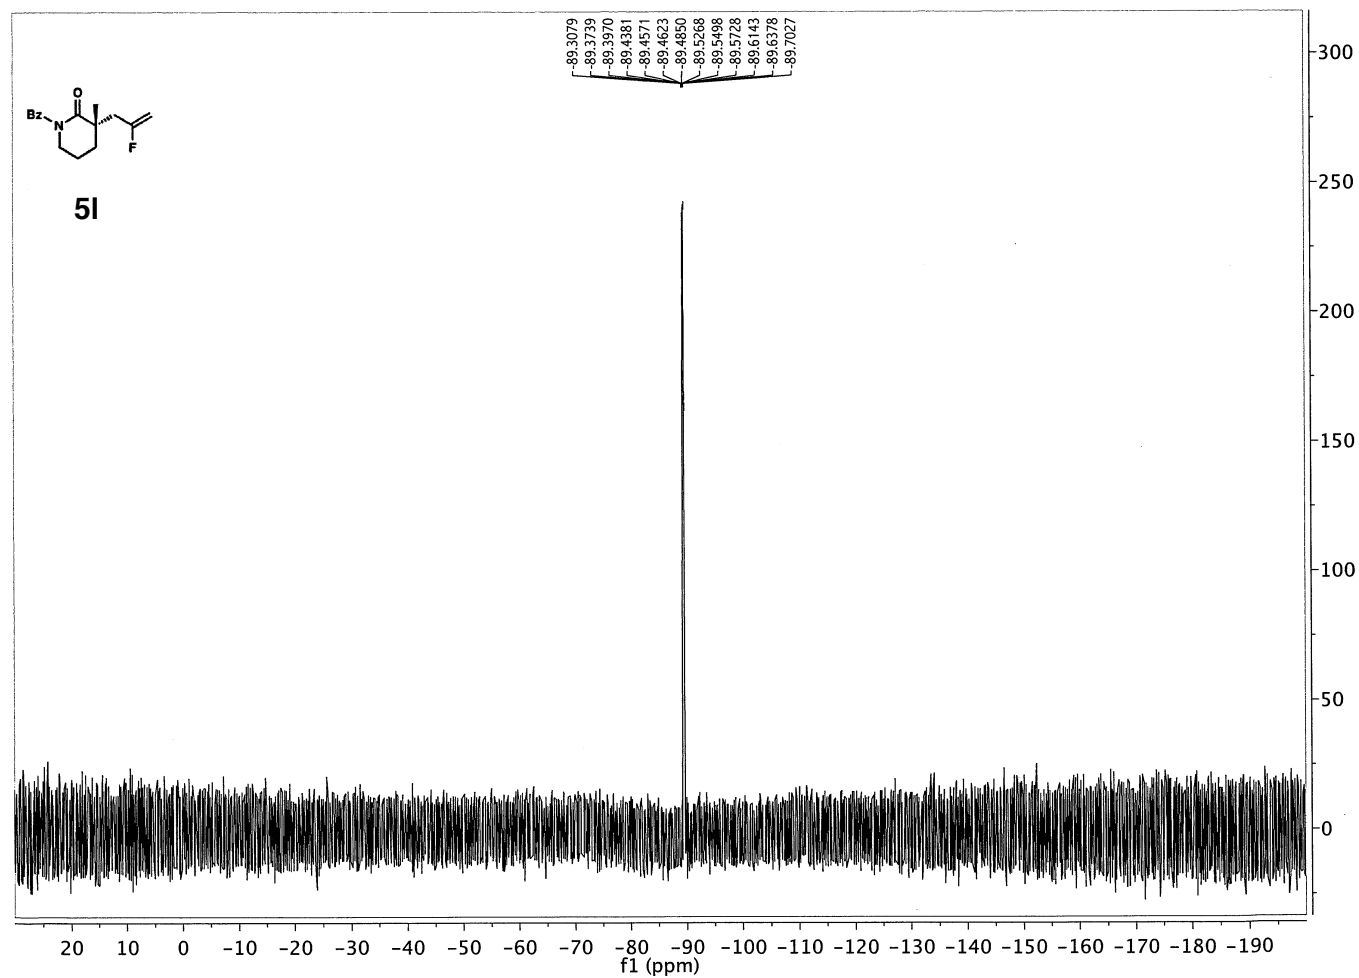

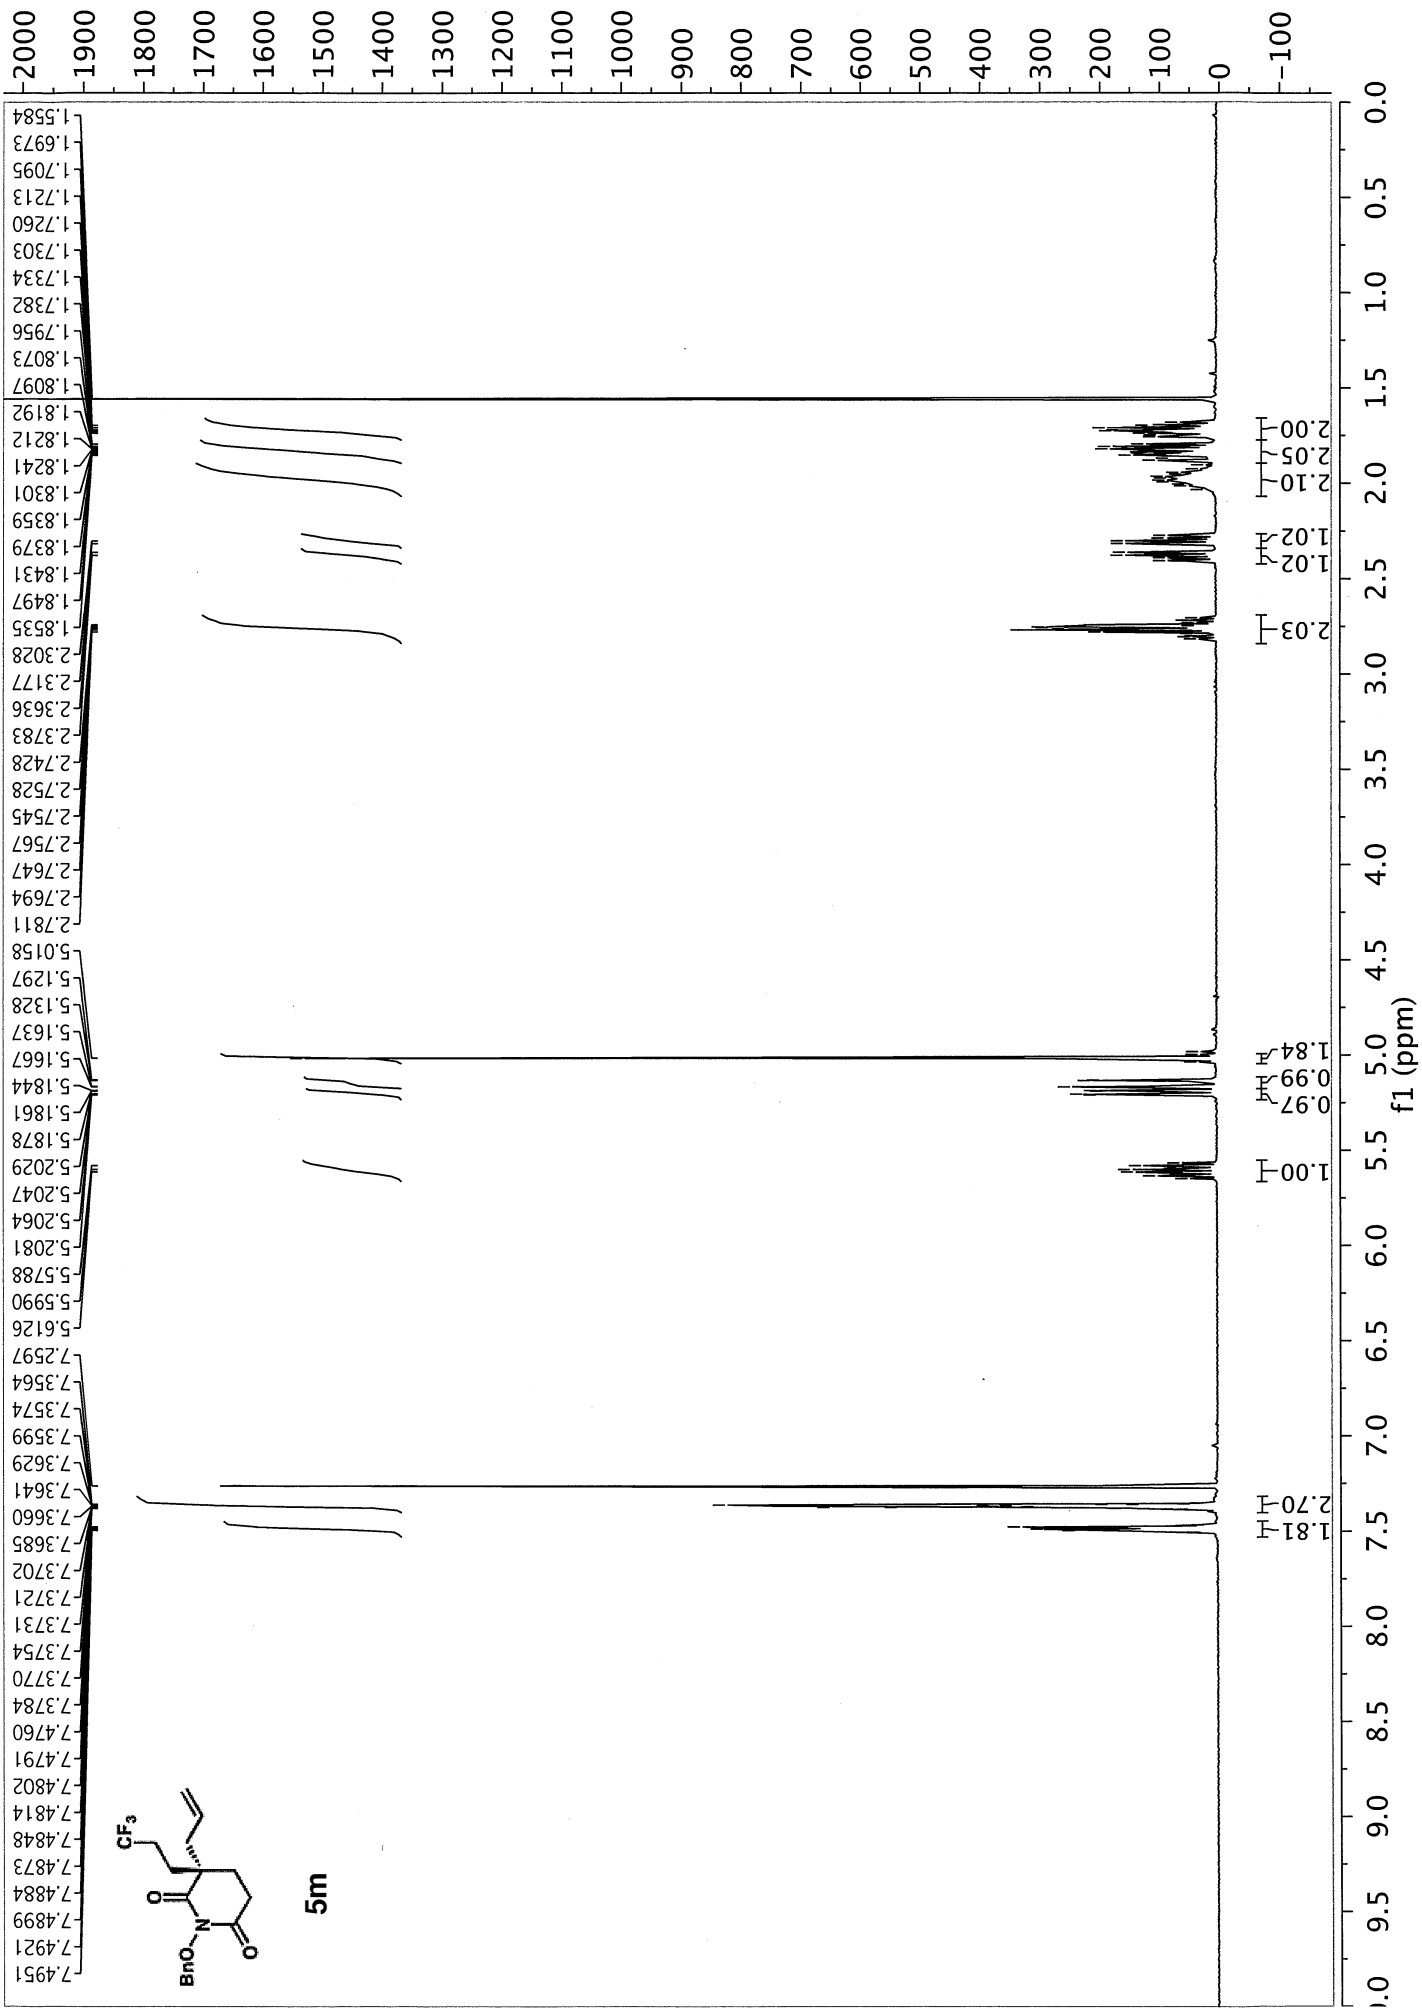

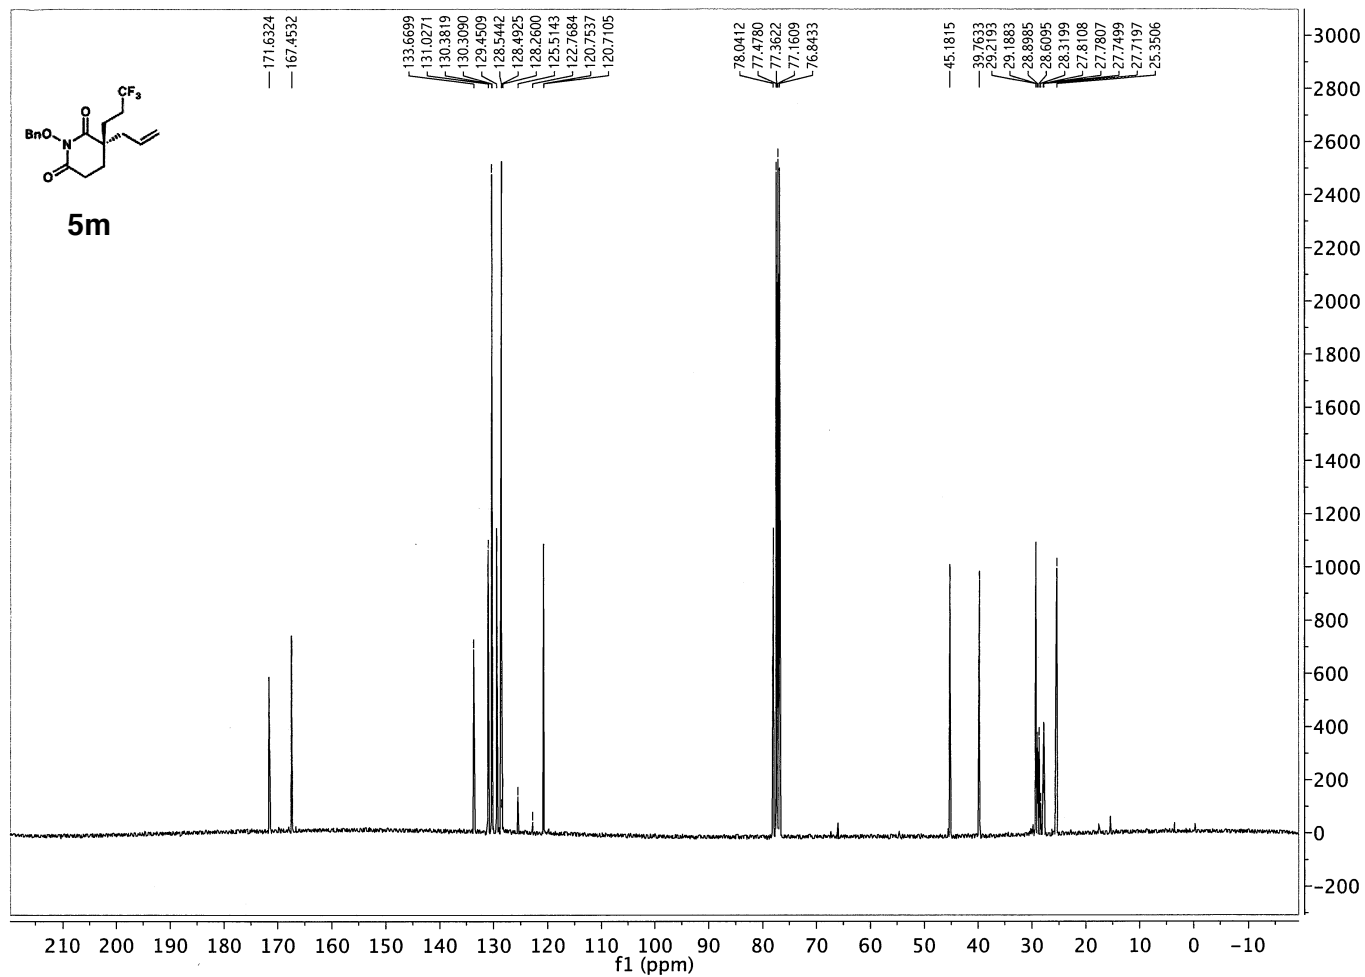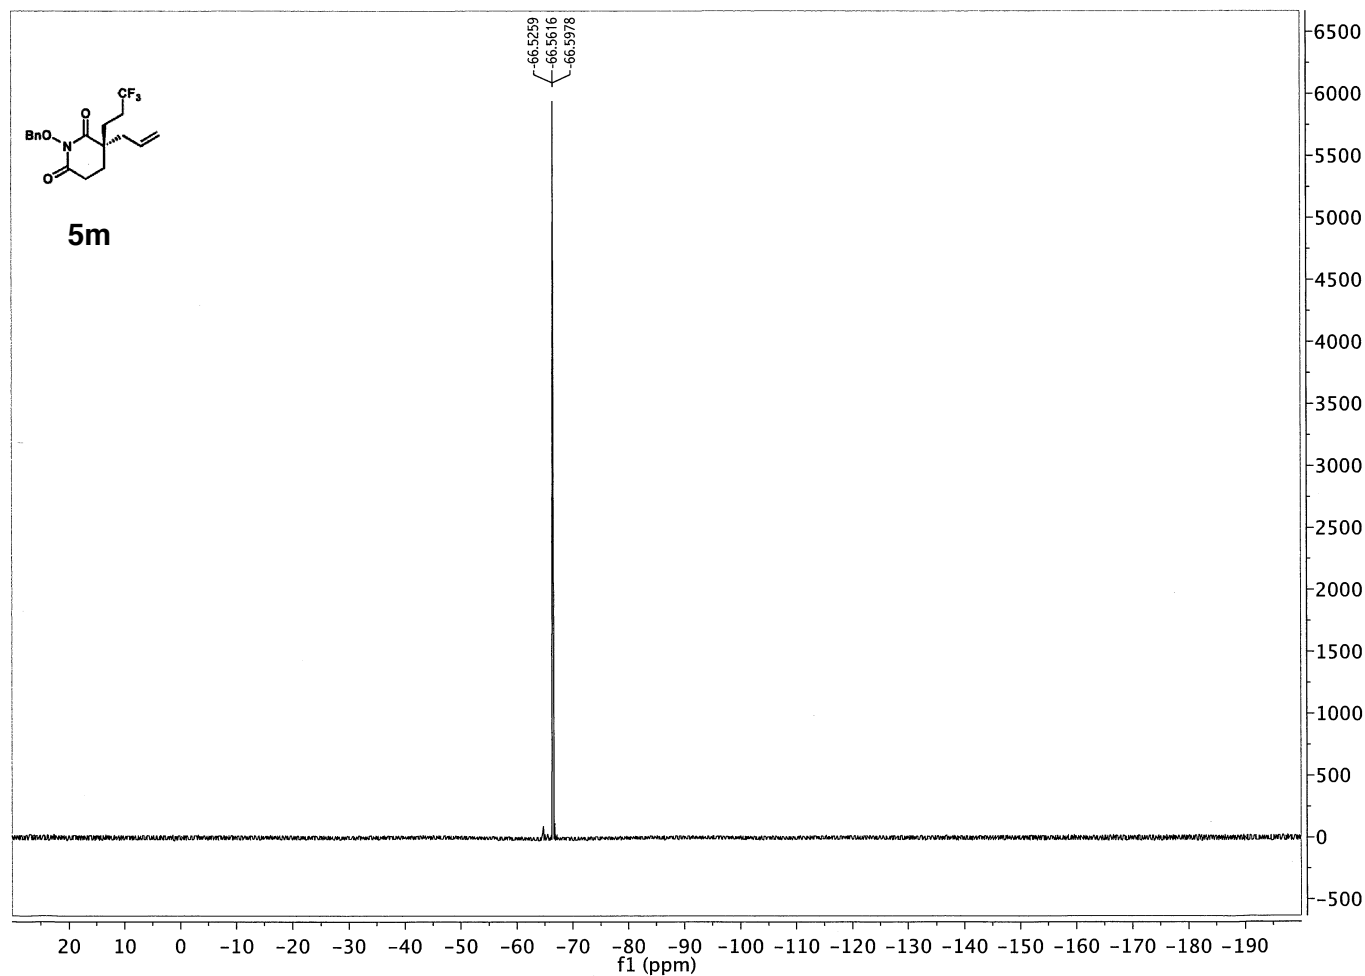

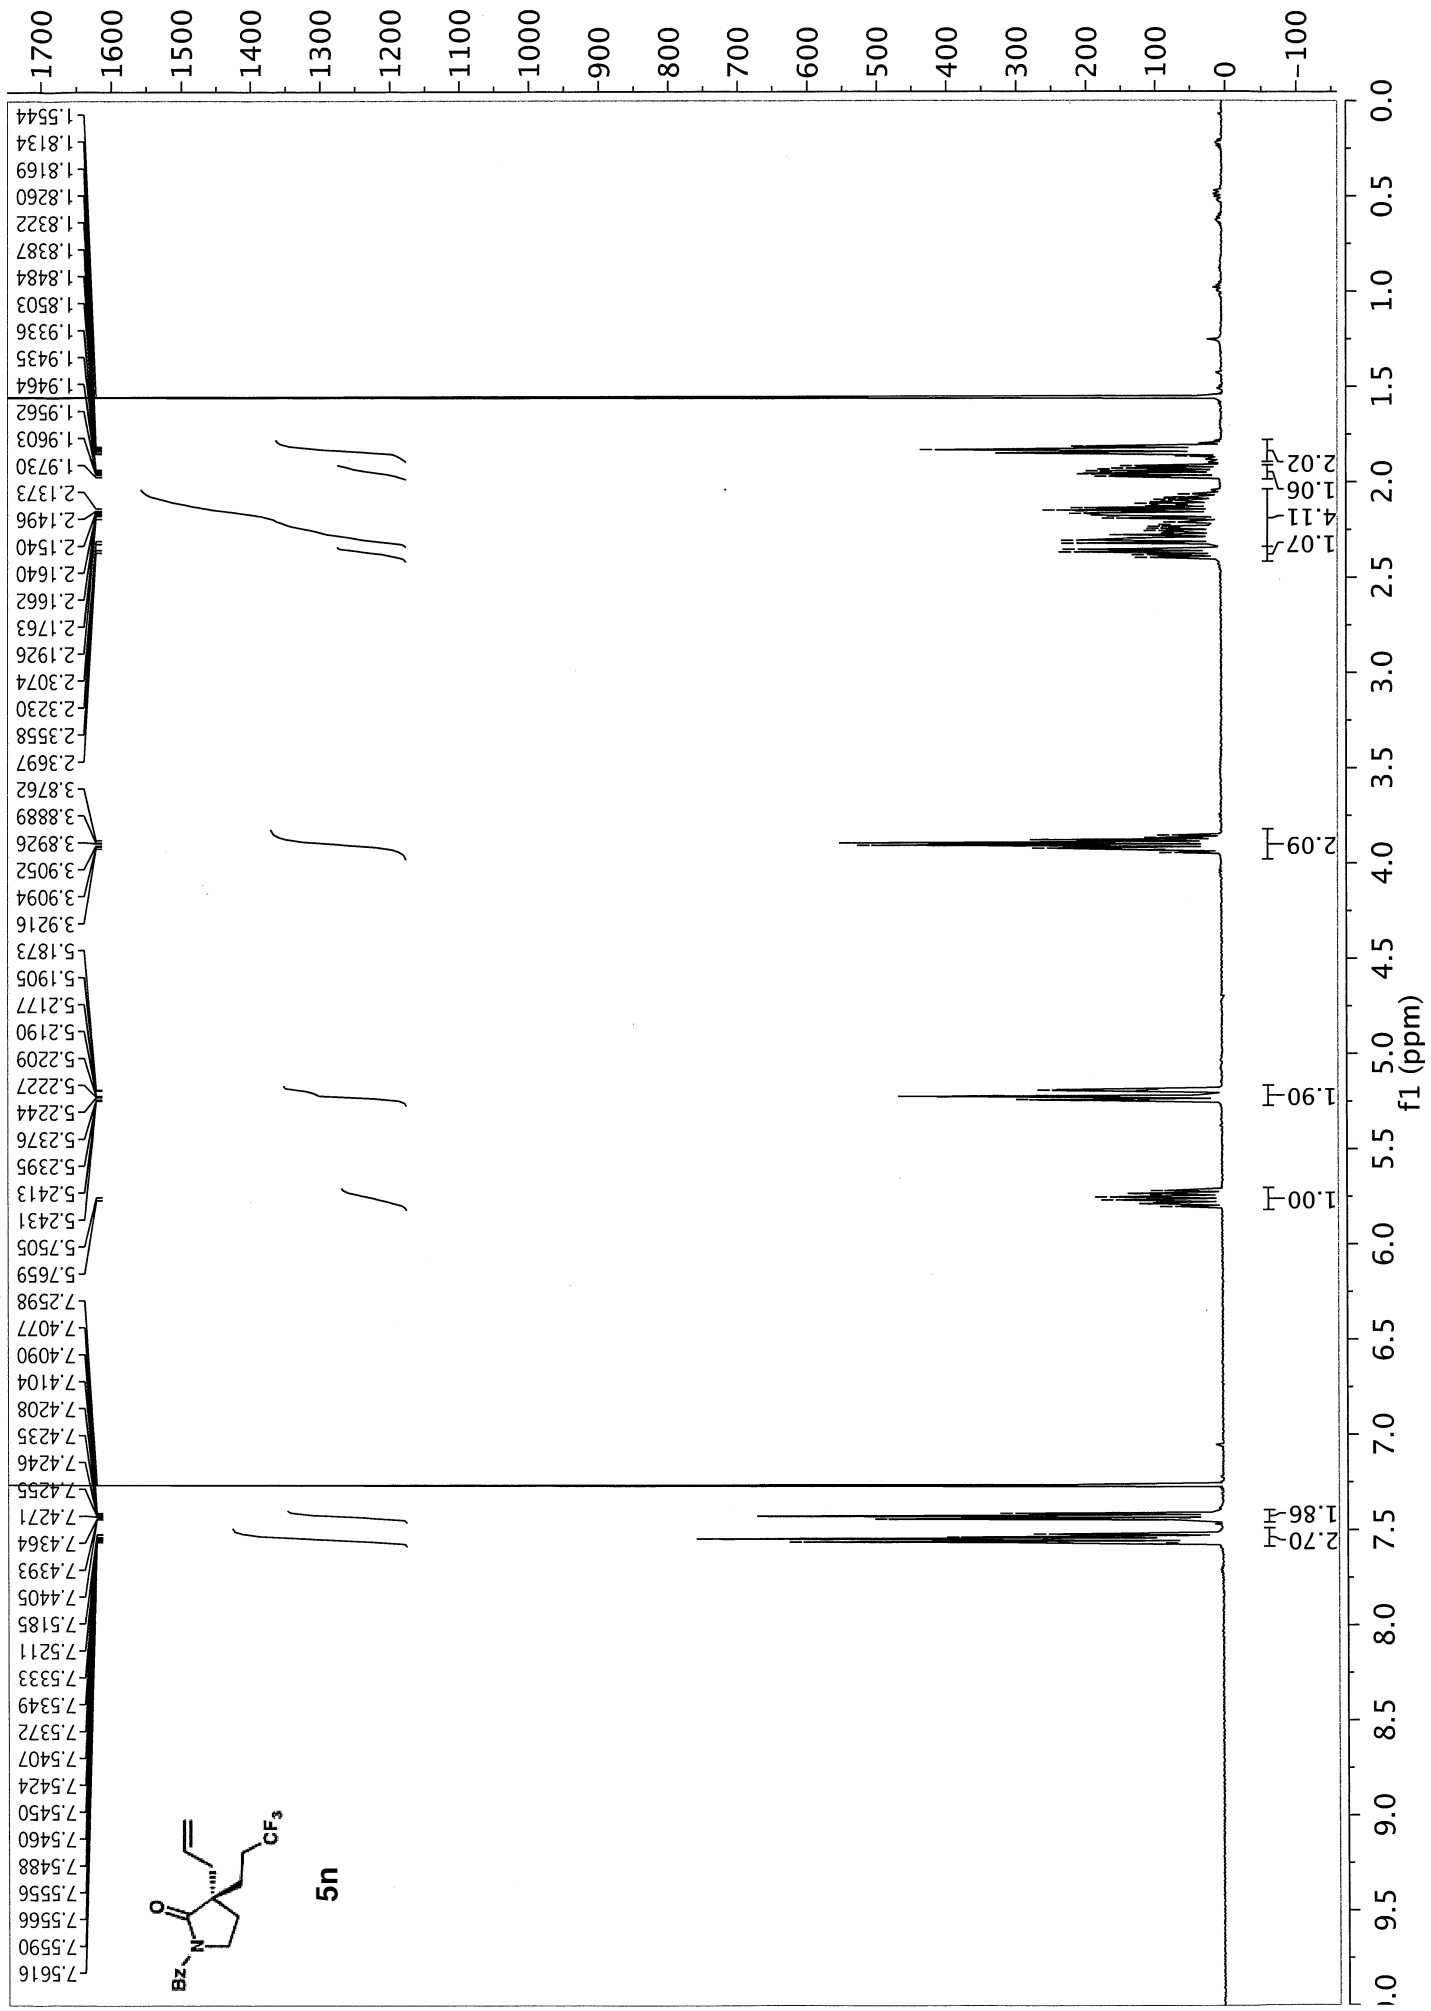

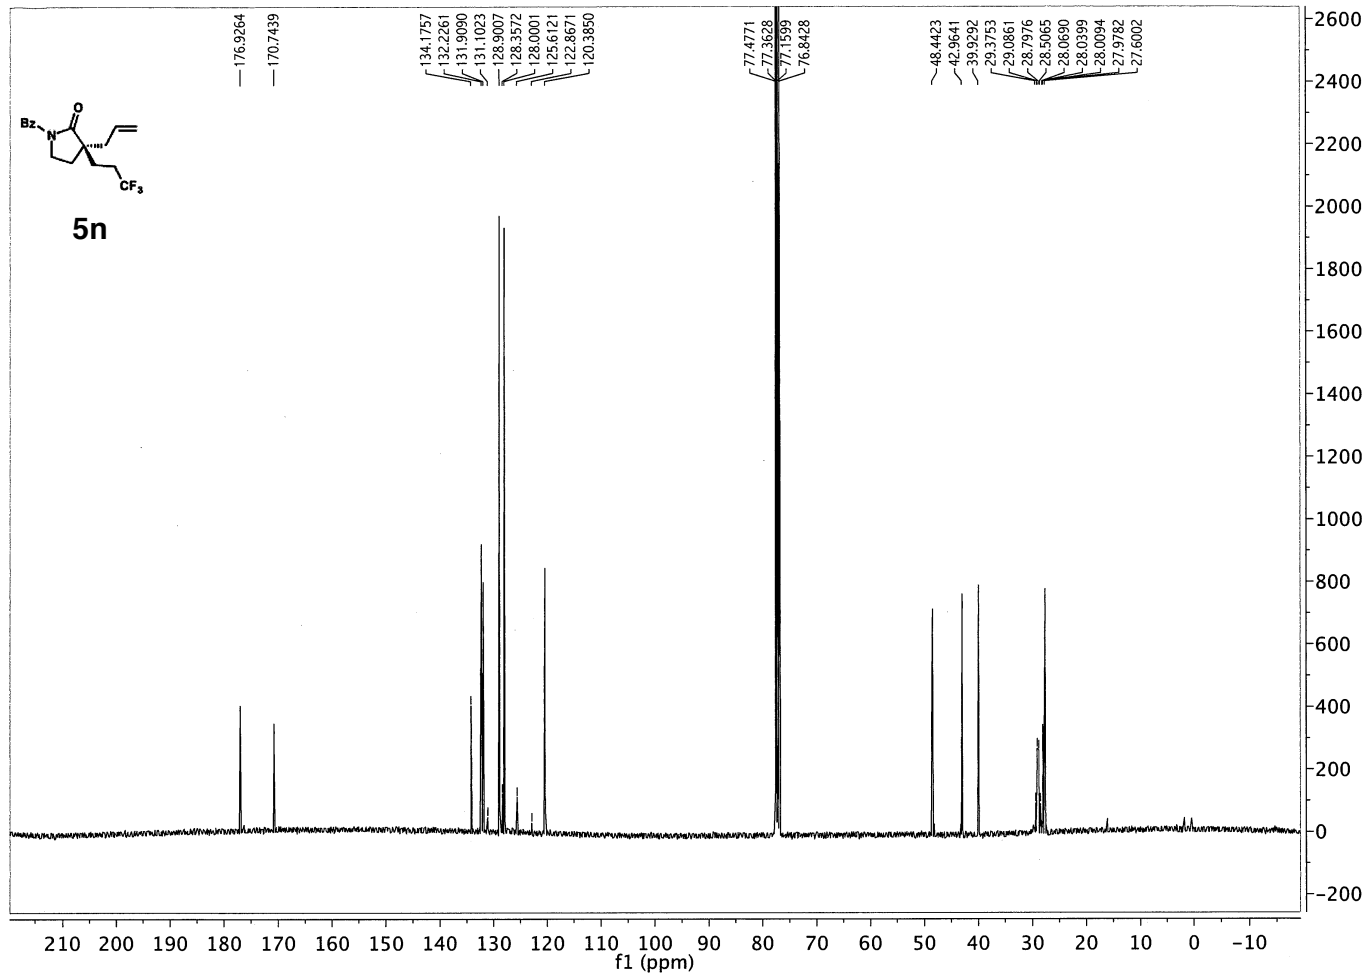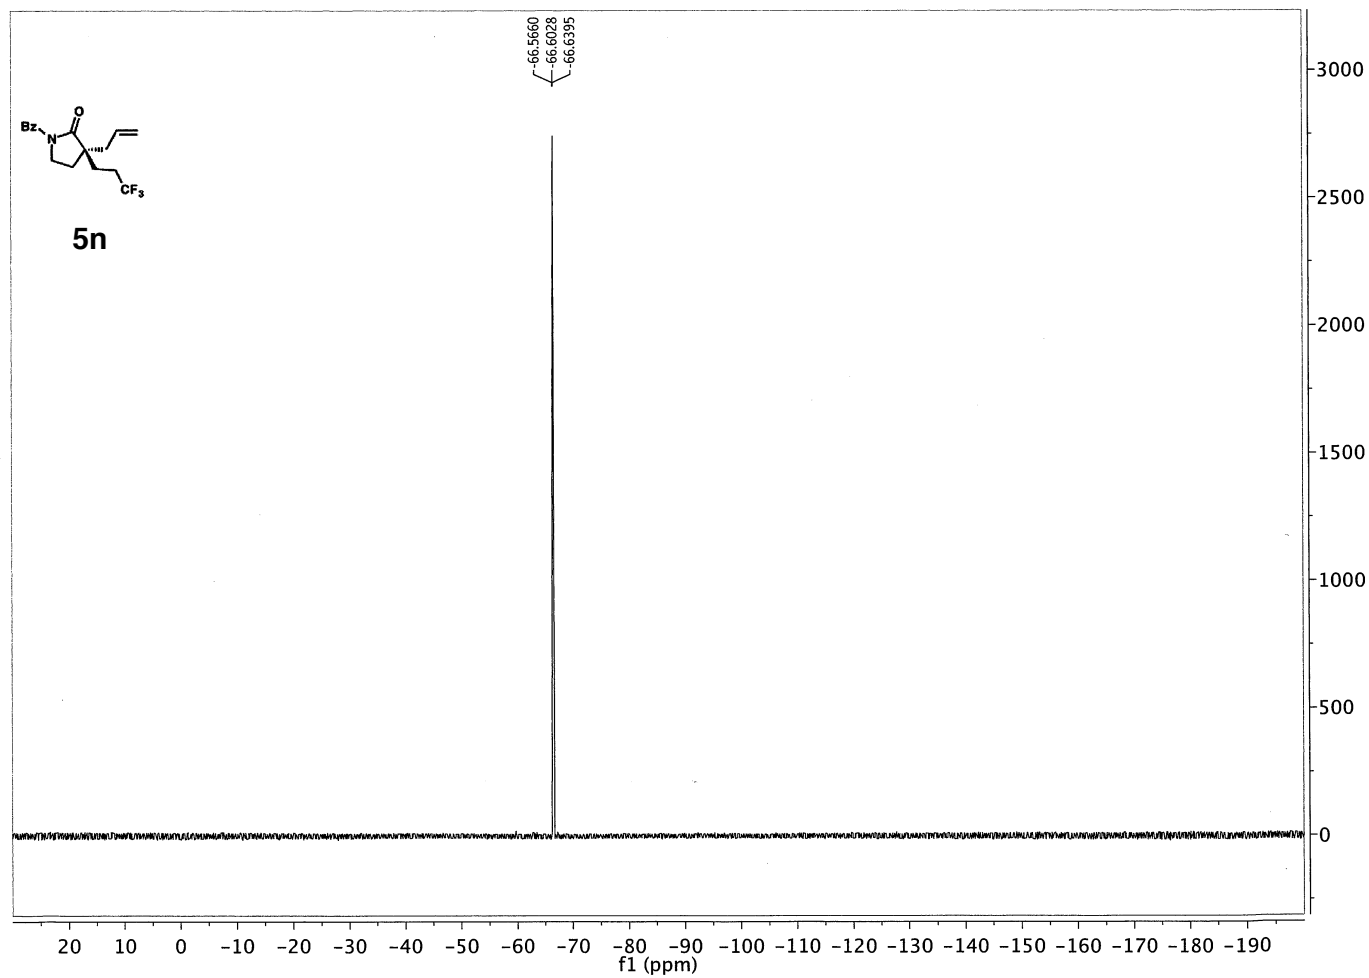

Supplement: NIHMS989121-supplement-Suppl_Info.pdf [file NIHMS989121-supplement-Suppl_Info.pdf]
